# Supplementary material for: Canopy soil bacterial communities altered by severing host tree limbs
Source: PeerJ. 2017 Sep 6;5:e3773. doi: 10.7717/peerj.3773 (PMC5591635; doi:10.7717/peerj.3773)
Supplement: File S3 [file peerj-05-3773-s003.xlsx]

## Sheet: rare (<10 ct) sequences removed
		CA-AT											CA-SE													GR-PE							GR-FL			GR-SO
Representative Sequence	total	CAATDIS1	CAATDIS3	CAATDIS4	CAATDIS7	CAATDIS8	CAATDIS9	CAATINT1	CAATINT2	CAATINT4	CAATINT6	CAATINT7	CASEDIS1	CASEDIS2	CASEDIS3	CASEDIS4	CASEDIS7	CASEDIS8	CASEINT1	CASEINT2	CASEINT3	CASEINT4	CASEINT6	CASEINT7	CASEINT9	GRDIS1	GRDIS2	GRDIS5	GRDIS7	GRINT2	GRINT4	GRINT6	GRFL2	GRFL6	GRFL9	Ground_soil_1	Ground_soil_2	Ground_soil_3	Category	Taxonomy
HWI-M02808_115_AHB9G_1_2114_21147_2777	37598	3	0	815	8695	1261	545	531	0	115	372	1978	1572	38	17	1408	7134	360	1174	229	368	1189	287	4727	278	6	7	268	15	285	597	205	6	574	0	2	12	0		Bacteria;Cyanobacteria;Chloroplast;Chloroplast_unclassified;Chloroplast_unclassified;Chloroplast_unclassified;Chloroplast_unclassified
HWI-M02808_115_AHB9G_1_1101_11641_16840	26207	87	2	0	50	105	28	332	0	2	0	2	64	54	2634	287	616	198	409	226	631	11506	1380	4104	7	0	0	76	0	68	6	3	0	0	0	0	0	0	CASE_Unique	Bacteria;Cyanobacteria;Chloroplast;Chloroplast_unclassified;Chloroplast_unclassified;Chloroplast_unclassified;Chloroplast_unclassified
HWI-M02808_115_AHB9G_1_1101_18854_2850	25444	1922	126	269	2733	5798	2780	6086	294	1198	515	9	110	11	0	7	0	1	68	0	5	7	3	0	0	4	0	0	4	0	8	14	0	0	9	0	0	0		Bacteria;Cyanobacteria;Chloroplast;Chloroplast_unclassified;Chloroplast_unclassified;Chloroplast_unclassified;Chloroplast_unclassified
HWI-M02808_115_AHB9G_1_1102_11518_8826	24911	0	0	1823	0	0	1182	2303	31	2572	433	3005	2194	361	0	2892	47	0	2878	5	116	44	11	3282	647	0	0	0	0	0	156	0	11	0	0	0	0	0		Bacteria;Proteobacteria;Alphaproteobacteria;Rickettsiales;Mitochondria;Mitochondria_unclassified;Mitochondria_unclassified
HWI-M02808_115_AHB9G_1_1101_10514_4053	23685	1106	509	1409	683	1406	1035	1371	441	873	379	895	703	471	214	1384	0	441	1181	396	0	0	0	1047	440	0	0	908	0	0	1412	0	0	0	1458	0	0	0		Bacteria;Proteobacteria;Alphaproteobacteria;Rhizobiales;Bradyrhizobiaceae;Bradyrhizobium;Bradyrhizobium_unclassified
HWI-M02808_115_AHB9G_1_1110_18359_7040	20008	15	2	1067	10	8	753	1064	8	1349	288	2594	1653	466	0	2576	22	1	3762	0	104	30	1	2675	562	0	1	26	6	17	33	1	0	0	5	0	0	0		Bacteria;Cyanobacteria;Chloroplast;Chloroplast_unclassified;Chloroplast_unclassified;Chloroplast_unclassified;Chloroplast_unclassified
HWI-M02808_115_AHB9G_1_1101_5444_15533	12657	227	60	116	408	391	133	582	81	48	23	216	391	166	182	532	390	110	802	269	256	715	236	676	182	168	98	1062	409	1186	587	177	104	139	136	38	45	31		Bacteria;Proteobacteria;Deltaproteobacteria;Myxococcales;BIrii41;uncultured_bacterium;uncultured_bacterium_unclassified
HWI-M02808_115_AHB9G_1_1101_23750_6223	12469	537	50	101	765	824	0	636	0	74	12	286	289	59	0	47	325	58	605	77	62	259	35	0	34	847	149	811	828	974	948	871	94	196	182	435	0	237		Bacteria;Bacteroidetes;Sphingobacteriia;Sphingobacteriales;Chitinophagaceae;Chitinophagaceae_unclassified;Chitinophagaceae_unclassified
HWI-M02808_115_AHB9G_1_1101_20235_5769	10681	0	0	0	0	0	0	0	0	0	0	0	0	0	0	0	551	0	0	0	143	491	109	0	0	1553	392	0	797	913	0	785	905	479	0	1485	1031	724	CAAT_Inhibited	Bacteria;Proteobacteria;Alphaproteobacteria;Rhizobiales;Bradyrhizobiaceae;Bradyrhizobium;Bradyrhizobium_elkanii
HWI-M02808_115_AHB9G_1_1101_20720_3079	8911	146	183	452	147	242	289	483	1029	525	147	215	231	171	22	638	119	696	266	144	5	2	20	60	197	340	39	83	109	95	354	102	4	0	315	10	0	71		Bacteria;Acidobacteria;Acidobacteria;Subgroup_2;uncultured_Acidobacteria_bacterium;uncultured_Acidobacteria_bacterium_unclassified;uncultured_Acidobacteria_bacterium_unclassified
HWI-M02808_115_AHB9G_1_1101_22787_3961	8543	380	220	0	0	1291	0	454	1164	0	135	0	0	0	29	0	0	155	203	74	2	38	17	326	0	885	59	110	88	54	503	183	99	112	0	274	25	700		Bacteria;Proteobacteria;Gammaproteobacteria;Xanthomonadales;Xanthomonadales_uncultured;uncultured_eubacterium_WD260;uncultured_eubacterium_WD260_unclassified
HWI-M02808_115_AHB9G_1_1101_18746_4630	8034	508	20	28	260	307	0	445	0	0	0	199	572	122	166	193	279	48	906	120	62	540	105	560	72	136	6	382	140	196	591	162	25	48	87	49	30	76		Bacteria;Bacteroidetes;Sphingobacteriia;Sphingobacteriales;Chitinophagaceae;Chitinophagaceae_uncultured;Chitinophagaceae_unclassified
HWI-M02808_115_AHB9G_1_1101_21197_8251	7990	0	0	0	0	0	169	0	1	0	0	0	222	0	28	160	4011	1691	349	81	0	0	0	6	0	0	7	801	0	165	59	1	0	64	0	1	3	41	CAAT_Inhibited	Bacteria;Cyanobacteria;Chloroplast;Chloroplast_unclassified;Chloroplast_unclassified;Chloroplast_unclassified;Chloroplast_unclassified
HWI-M02808_115_AHB9G_1_1101_19500_2871	7490	360	44	0	43	369	0	409	0	0	10	331	416	162	50	72	87	82	557	114	12	103	27	847	20	542	79	321	198	121	298	534	140	104	5	110	87	348		Bacteria;Acidobacteria;Acidobacteria;Acidobacteriales;Acidobacteriaceae_(Subgroup_1);Acidobacteriaceae_(Subgroup_1)_uncultured;uncultured_Acidobacteria_bacterium
HWI-M02808_115_AHB9G_1_1101_15914_7173	6685	201	0	7	32	103	4	101	0	1	0	36	426	33	92	134	228	35	665	56	145	848	99	432	15	74	59	379	821	277	670	161	20	41	15	27	28	11	CAAT_Inhibited	Bacteria;Verrucomicrobia;Opitutae;Opitutales;Opitutaceae;Opitutus;Opitutus_unclassified
HWI-M02808_115_AHB9G_1_1101_6001_10643	6412	105	53	333	376	363	308	191	81	307	45	359	209	74	12	334	214	28	180	38	1	38	20	261	38	173	46	173	392	200	259	221	37	87	307	79	47	87		Bacteria;Acidobacteria;Acidobacteria;Subgroup_3;Unknown_Family;Candidatus_Solibacter;uncultured_forest_soil_bacterium
HWI-M02808_115_AHB9G_1_1101_14011_7665	6313	484	11	0	111	157	5	253	1	6	6	68	438	44	233	76	337	24	588	106	125	953	367	428	10	24	7	151	102	185	471	40	24	9	4	12	2	4	CASE_Unique	Bacteria;Bacteroidetes;Sphingobacteriia;Sphingobacteriales;Chitinophagaceae;Chitinophagaceae_uncultured;uncultured_Chitinophaga_sp.
HWI-M02808_115_AHB9G_1_1101_15606_12831	6275	231	250	731	59	404	271	100	492	559	357	221	25	83	0	933	0	0	50	5	0	3	0	3	105	0	0	0	3	3	44	0	0	0	431	0	0	0		Bacteria;Actinobacteria;Actinobacteria;Frankiales;Acidothermaceae;Acidothermus;uncultured_soil_bacterium
HWI-M02808_115_AHB9G_1_1102_7804_7617	5993	26	0	0	0	18	2	120	1	0	0	9	263	9	165	4	166	43	379	35	293	1062	274	342	0	2	11	720	745	220	338	204	41	11	0	0	16	0	CASE_Unique	Bacteria;Proteobacteria;Deltaproteobacteria;Myxococcales;Haliangiaceae;Haliangium;Haliangium_unclassified
HWI-M02808_115_AHB9G_1_1101_20653_15069	5974	725	0	0	5	56	0	55	0	0	4	46	167	55	280	11	94	15	85	56	775	1101	618	169	1	0	12	52	100	112	364	26	41	3	0	37	17	6	CAAT_Inhibited	Bacteria;Actinobacteria;Thermoleophilia;Solirubrobacterales;Patulibacteraceae;Patulibacter;Patulibacter_unclassified
HWI-M02808_115_AHB9G_1_1104_2365_11435	5916	0	2	61	0	0	0	0	0	0	0	0	0	0	0	0	0	0	0	0	0	0	0	0	0	0	0	6	0	0	9	0	0	5835	1	1	0	0	GRFL_Unique	Bacteria;Cyanobacteria;Chloroplast;Cercis_gigantea;Cercis_gigantea_unclassified;Cercis_gigantea_unclassified;Cercis_gigantea_unclassified
HWI-M02808_115_AHB9G_1_1101_7275_25717	5904	0	0	669	1142	0	930	0	0	141	0	814	569	162	0	817	294	0	0	0	0	0	0	0	165	0	0	0	0	0	0	0	0	0	0	0	0	0		Bacteria;Proteobacteria;Gammaproteobacteria;Xanthomonadales;Xanthomonadales_uncultured;uncultured_eubacterium_WD260;uncultured_eubacterium_WD260_unclassified
HWI-M02808_115_AHB9G_1_1101_16598_10430	5562	61	61	57	256	90	261	236	54	162	133	387	329	193	66	430	120	274	171	176	0	28	33	72	536	9	9	22	0	88	184	6	0	6	167	6	0	23		Bacteria;Actinobacteria;Thermoleophilia;Solirubrobacterales;TM146;TM146_unclassified;TM146_unclassified
HWI-M02808_115_AHB9G_1_1101_23522_7740	5495	0	0	0	109	1248	0	224	1	0	3	520	738	83	49	97	195	32	1103	175	6	0	12	348	0	31	0	135	10	112	175	1	3	0	3	0	6	0		Bacteria;Verrucomicrobia;Spartobacteria;Chthoniobacterales;DA101_soil_group;uncultured_Verrucomicrobia_bacterium;uncultured_Verrucomicrobia_bacterium_unclassified
HWI-M02808_115_AHB9G_1_1101_20414_10266	5354	133	33	49	123	214	215	152	11	42	34	349	359	92	38	431	125	55	355	107	1	0	32	879	67	36	2	206	100	134	375	14	0	5	7	0	0	0		Bacteria;Acidobacteria;Acidobacteria;Acidobacteriales;Acidobacteriaceae_(Subgroup_1);Acidobacteriaceae_(Subgroup_1)_uncultured;Acidobacteriaceae_(Subgroup_1)_unclassified
HWI-M02808_115_AHB9G_1_1101_20255_11191	5268	505	107	0	0	0	0	205	215	77	0	0	0	202	21	658	16	8	525	0	0	2	11	238	112	433	0	193	53	127	431	208	0	0	287	0	0	47		Bacteria;Acidobacteria;Acidobacteria;Acidobacteriales;Acidobacteriaceae_(Subgroup_1);Acidobacteriaceae_(Subgroup_1)_uncultured;Acidobacteriaceae_(Subgroup_1)_unclassified
HWI-M02808_177_ANHM9_1_1101_14942_22066	5081	0	0	90	1251	164	80	78	1	17	50	189	146	13	10	102	1187	0	143	19	45	263	39	568	40	0	0	0	3	32	70	12	3	64	20	0	0	0		Bacteria;Proteobacteria;Alphaproteobacteria;Rickettsiales;Mitochondria;Funaria_hygrometrica;Funaria_hygrometrica_unclassified
HWI-M02808_115_AHB9G_1_1101_11492_2890	4904	1928	18	0	9	826	0	0	0	1	0	206	0	0	60	0	72	10	43	5	1	36	49	17	0	96	0	0	988	232	125	0	0	2	0	0	0	0		Bacteria;Verrucomicrobia;Spartobacteria;Chthoniobacterales;DA101_soil_group;uncultured_Verrucomicrobia_bacterium;uncultured_Verrucomicrobia_bacterium_unclassified
HWI-M02808_115_AHB9G_1_1101_7354_4650	4770	125	240	287	154	183	463	62	161	207	315	275	80	111	10	316	31	46	79	38	8	9	19	38	193	34	0	9	2	9	45	5	2	1	97	0	0	4		Bacteria;Actinobacteria;Thermoleophilia;Solirubrobacterales;YNPFFP1;uncultured_bacterium;uncultured_bacterium_unclassified
HWI-M02808_115_AHB9G_1_1101_11447_3127	4579	90	0	5	10	16	0	13	0	0	0	5	216	49	225	2	303	13	408	30	163	503	262	0	0	0	21	352	635	305	339	0	6	4	0	0	22	0	CAAT_Inhibited	Bacteria;Actinobacteria;Actinobacteria;Kineosporiales;Kineosporiaceae;Kineosporia;uncultured_bacterium
HWI-M02808_115_AHB9G_1_1101_10310_3569	4498	451	51	28	146	425	31	45	25	36	72	814	234	145	100	373	0	15	164	48	5	0	6	9	75	38	1	22	5	80	319	14	0	0	115	0	0	0		Bacteria;Actinobacteria;Actinobacteria;Pseudonocardiales;Pseudonocardiaceae;Crossiella;Crossiella_unclassified
HWI-M02808_115_AHB9G_1_1101_10645_6547	4479	92	0	0	0	0	0	32	0	0	0	0	60	0	19	0	39	0	0	1	18	37	32	19	0	138	41	690	1375	870	372	106	170	100	1	79	93	13	Ground	Bacteria;Verrucomicrobia;Opitutae;Opitutales;Opitutaceae;Opitutus;uncultured_soil_bacterium
HWI-M02808_115_AHB9G_1_1101_10289_2547	4402	513	74	239	142	387	157	218	117	169	95	139	133	162	65	184	35	78	97	112	0	1	12	28	72	98	0	56	23	41	178	4	0	0	10	0	0	0		Bacteria;Acidobacteria;Acidobacteria;Subgroup_2;uncultured_Acidobacteria_bacterium;uncultured_Acidobacteria_bacterium_unclassified;uncultured_Acidobacteria_bacterium_unclassified
HWI-M02808_115_AHB9G_1_1101_11990_4211	4180	517	8	16	42	235	12	200	0	0	8	223	221	69	43	18	87	62	240	77	10	98	31	265	9	175	33	209	284	183	177	22	52	10	3	75	84	54		Bacteria;Acidobacteria;Acidobacteria;Acidobacteriales;Acidobacteriaceae_(Subgroup_1);Acidobacteriaceae_(Subgroup_1)_uncultured;Acidobacteriaceae_(Subgroup_1)_unclassified
HWI-M02808_115_AHB9G_1_1101_13552_18478	4172	199	90	0	257	265	602	144	119	335	98	235	122	116	0	994	112	6	2	18	0	0	0	0	76	42	0	0	0	0	0	19	0	0	0	0	0	0		Bacteria;Bacteroidetes;Sphingobacteriia;Sphingobacteriales;Chitinophagaceae;Chitinophagaceae_unclassified;Chitinophagaceae_unclassified
HWI-M02808_115_AHB9G_1_1101_12622_5175	4121	168	0	0	13	6	0	0	0	0	0	11	201	4	138	0	196	16	48	7	22	239	110	93	0	2	30	509	1447	234	265	7	0	0	0	0	20	1	CAAT_Inhibited	Bacteria;Proteobacteria;Deltaproteobacteria;Myxococcales;Phaselicystidaceae;Phaselicystis;Phaselicystis_unclassified
HWI-M02808_115_AHB9G_1_1101_22949_7376	4090	249	0	0	25	161	0	166	0	0	0	0	86	0	55	0	48	0	130	93	7	0	7	22	0	232	283	240	0	298	149	204	365	69	2	309	428	0		Bacteria;Acidobacteria;Acidobacteria;Subgroup_6;Subgroup_6_unclassified;Subgroup_6_unclassified;Subgroup_6_unclassified
HWI-M02808_115_AHB9G_1_1101_18474_2988	4080	120	0	0	122	227	26	99	0	10	0	74	217	83	89	82	179	36	268	123	199	551	247	270	15	11	0	64	75	114	76	0	20	10	0	0	15	15	CASE_Unique	Bacteria;Proteobacteria;Betaproteobacteria;Burkholderiales;Comamonadaceae;Comamonadaceae_unclassified;Comamonadaceae_unclassified
HWI-M02808_115_AHB9G_1_1101_11085_6897	4037	252	73	76	81	148	190	73	33	163	32	90	95	22	15	271	40	10	180	16	0	13	11	99	43	184	28	110	131	120	182	236	67	78	267	155	63	136		Bacteria;Acidobacteria;Acidobacteria;Subgroup_3;Unknown_Family;Unknown_Family_unclassified;Unknown_Family_unclassified
HWI-M02808_115_AHB9G_1_1101_24083_10278	3934	0	50	24	0	117	12	130	34	8	27	0	169	85	0	30	47	21	202	74	11	15	0	44	27	171	94	67	157	240	521	114	269	60	8	218	325	106	Ground	Bacteria;Acidobacteria;Acidobacteria;Subgroup_6;Subgroup_6_unclassified;Subgroup_6_unclassified;Subgroup_6_unclassified
HWI-M02808_115_AHB9G_1_1104_14049_7536	3889	57	0	2	0	0	0	171	0	0	0	27	320	30	114	0	214	32	667	112	27	171	76	558	17	39	23	205	163	131	228	84	35	12	13	32	120	9	CAAT_Inhibited	Bacteria;Bacteroidetes;Sphingobacteriia;Sphingobacteriales;Chitinophagaceae;Chitinophagaceae_unclassified;Chitinophagaceae_unclassified
HWI-M02808_115_AHB9G_1_1101_17212_3601	3886	32	2	0	2	28	0	57	0	0	0	8	70	0	112	1	42	35	36	4	12	99	46	71	0	7	34	271	2198	256	199	45	17	55	0	5	0	4	CAAT_Inhibited	Bacteria;Bacteroidetes;Cytophagia;Cytophagales;Cytophagaceae;Cytophagaceae_unclassified;Cytophagaceae_unclassified
HWI-M02808_115_AHB9G_1_1101_9240_5988	3752	1557	134	856	0	0	0	1	62	310	21	1	0	0	0	0	3	0	1	0	0	0	0	5	0	66	12	38	50	47	80	15	236	0	1	65	44	24		Bacteria;Cyanobacteria;Chloroplast;Cercis_gigantea;Cercis_gigantea_unclassified;Cercis_gigantea_unclassified;Cercis_gigantea_unclassified
HWI-M02808_115_AHB9G_1_1103_16985_13113	3706	30	18	122	220	215	136	162	7	77	55	194	99	60	8	80	176	103	232	31	7	21	14	185	65	43	8	148	39	130	214	4	145	53	250	10	105	19		Bacteria;Actinobacteria;Actinobacteria;Micrococcales;Microbacteriaceae;Microbacteriaceae_unclassified;Microbacteriaceae_unclassified
HWI-M02808_115_AHB9G_1_1101_7699_5822	3688	142	93	279	50	79	61	121	275	418	56	117	34	10	2	277	37	73	80	27	5	1	11	53	29	127	19	44	39	55	508	21	34	0	133	45	16	0		Bacteria;Proteobacteria;Gammaproteobacteria;Xanthomonadales;Xanthomonadales_Incertae_Sedis;Acidibacter;uncultured_Steroidobacter_sp.
HWI-M02808_115_AHB9G_1_1101_18706_7538	3657	106	368	491	0	0	75	47	818	480	110	3	5	22	0	263	0	0	0	0	0	0	0	0	6	59	0	0	3	0	8	0	0	0	39	0	0	0		Bacteria;Acidobacteria;Acidobacteria;Subgroup_2;uncultured_Acidobacteria_bacterium;uncultured_Acidobacteria_bacterium_unclassified;uncultured_Acidobacteria_bacterium_unclassified
HWI-M02808_115_AHB9G_1_1101_14413_7324	3519	270	13	1	30	293	2	179	0	0	11	33	56	4	31	4	20	18	87	35	0	0	2	48	0	342	63	209	120	144	225	518	144	147	28	42	57	86		Bacteria;Proteobacteria;Deltaproteobacteria;Myxococcales;Haliangiaceae;Haliangium;Haliangium_unclassified
HWI-M02808_115_AHB9G_1_1101_20626_10969	3509	120	133	665	0	0	978	3	293	652	82	0	0	25	0	160	0	0	0	4	0	0	0	0	39	33	0	15	6	0	7	3	0	0	43	0	0	0		Bacteria;Verrucomicrobia;Opitutae;Opitutales;Opitutaceae;Opitutus;uncultured_bacterium
HWI-M02808_115_AHB9G_1_1109_24453_23135	3424	5	0	4	15	25	19	45	0	4	13	13	142	155	78	103	172	60	358	190	133	634	261	264	123	0	0	20	37	19	56	0	5	2	0	1	0	0	CASE_Unique	Bacteria;Proteobacteria;Alphaproteobacteria;Rhizobiales;Rhizobiales_unclassified;Rhizobiales_unclassified;Rhizobiales_unclassified
HWI-M02808_115_AHB9G_1_1101_14650_3141	3421	276	6	0	18	98	0	315	0	0	0	298	65	6	64	5	137	1	211	120	0	1	8	119	0	75	96	198	145	355	192	224	34	45	13	21	0	12		Bacteria;Proteobacteria;Deltaproteobacteria;Myxococcales;Haliangiaceae;Haliangium;Haliangium_unclassified
HWI-M02808_115_AHB9G_1_1102_14758_10648	3409	0	0	0	7	4	0	0	0	0	0	2	100	5	18	16	82	0	8	10	2	11	8	48	0	9	12	66	0	0	121	24	88	137	10	704	1684	152	CAAT_Inhibited	Bacteria;Proteobacteria;Gammaproteobacteria;Pseudomonadales;Pseudomonadaceae;Pseudomonas;Pseudomonas_unclassified
HWI-M02808_115_AHB9G_1_2109_11189_13172	3387	0	0	0	0	0	0	0	0	0	0	0	0	0	0	0	0	0	0	0	0	0	0	0	0	8	31	197	0	125	0	44	65	53	0	1428	1356	15	Ground	Bacteria;Proteobacteria;Gammaproteobacteria;Pseudomonadales;Pseudomonadaceae;Pseudomonas;Pseudomonas_unclassified
HWI-M02808_115_AHB9G_1_1101_15093_6662	3311	231	12	784	552	0	192	0	0	0	86	839	79	21	0	0	1	123	0	20	1	0	0	0	9	0	0	0	7	84	165	21	0	0	0	0	0	0		Bacteria;Verrucomicrobia;OPB35_soil_group;OPB35_soil_group_unclassified;OPB35_soil_group_unclassified;OPB35_soil_group_unclassified;OPB35_soil_group_unclassified
HWI-M02808_115_AHB9G_1_1101_9343_4803	3214	773	106	30	0	31	11	104	141	5	1	5	13	21	2	8	0	0	94	13	0	0	6	9	0	321	14	9	0	3	0	110	0	63	404	132	0	422		Bacteria;Acidobacteria;Acidobacteria;Acidobacteriales;Acidobacteriaceae_(Subgroup_1);Acidobacteriaceae_(Subgroup_1)_uncultured;Acidobacteriaceae_(Subgroup_1)_unclassified
HWI-M02808_115_AHB9G_1_1101_26610_9368	3109	131	20	0	0	0	152	324	0	0	11	163	180	0	19	114	141	0	284	31	0	83	8	287	0	0	0	102	340	192	335	0	45	0	0	0	30	0		Bacteria;Proteobacteria;Alphaproteobacteria;Rhizobiales;Rhizobiales_Incertae_Sedis;Rhizomicrobium;Rhizomicrobium_unclassified
HWI-M02808_115_AHB9G_1_1103_23755_6996	3038	10	41	323	0	81	536	81	126	477	234	1	16	120	0	247	1	72	0	0	0	0	0	5	28	38	0	7	3	8	131	58	0	0	71	7	0	1		Bacteria;Acidobacteria;Acidobacteria;Acidobacteriales;Acidobacteriaceae_(Subgroup_1);Acidobacteriaceae_(Subgroup_1)_uncultured;Acidobacteriaceae_(Subgroup_1)_unclassified
HWI-M02808_115_AHB9G_1_1101_19207_2755	3000	59	52	273	100	52	93	59	60	382	95	81	25	66	5	173	78	73	44	7	4	27	8	111	49	31	3	6	22	6	111	93	8	0	278	28	11	123		Bacteria;Proteobacteria;Betaproteobacteria;Burkholderiales;Burkholderiaceae;Burkholderia;Burkholderia_sordidicola
HWI-M02808_115_AHB9G_1_1101_9338_4664	2944	451	0	2	8	66	6	208	0	0	3	466	81	39	60	0	31	37	85	63	8	8	20	28	3	49	30	79	51	114	227	64	121	20	0	67	57	24		Bacteria;Proteobacteria;Alphaproteobacteria;Rhizobiales;Hyphomicrobiaceae;Rhodoplanes;uncultured_alpha_proteobacterium
HWI-M02808_115_AHB9G_1_1101_21433_4107	2931	87	0	0	119	0	0	0	0	2	0	31	166	0	138	0	351	0	96	82	180	832	195	144	0	0	0	0	0	0	126	0	0	0	0	9	0	0	CAAT_Inhibited	Bacteria;Proteobacteria;Alphaproteobacteria;Sphingomonadales;Sphingomonadaceae;Sphingomonas;Sphingomonas_unclassified
HWI-M02808_115_AHB9G_1_1101_21452_3362	2929	77	0	28	30	36	0	45	1	0	1	78	78	16	60	31	83	31	109	49	41	213	60	85	6	78	96	208	275	157	166	72	120	34	6	114	91	32	CAAT_Inhibited	Bacteria;Proteobacteria;Alphaproteobacteria;Rhizobiales;Hyphomicrobiaceae;Devosia;Devosia_unclassified
HWI-M02808_115_AHB9G_1_1103_18009_9246	2842	67	6	15	89	34	9	47	0	0	14	76	95	59	19	58	300	71	110	16	19	42	29	329	28	34	15	168	105	70	221	14	60	84	15	62	203	99	CAAT_Inhibited	Bacteria;Proteobacteria;Alphaproteobacteria;Rhizobiales;Rhizobiaceae;Rhizobium;Rhizobium_unclassified
HWI-M02808_115_AHB9G_1_1101_12109_13075	2842	90	23	0	368	486	0	199	0	70	0	383	269	92	0	0	79	0	0	0	0	52	4	308	107	0	0	18	8	0	81	27	4	0	1	0	0	0		Bacteria;Verrucomicrobia;Opitutae;Opitutales;Opitutaceae;Opitutus;Opitutus_unclassified
HWI-M02808_115_AHB9G_1_1101_24565_11003	2811	117	43	0	193	274	151	151	10	122	65	0	104	70	8	141	108	23	267	25	1	16	0	100	24	80	0	54	112	0	146	38	0	4	129	9	0	18		Bacteria;Acidobacteria;Acidobacteria;Acidobacteriales;Acidobacteriaceae_(Subgroup_1);Granulicella;uncultured_bacterium
HWI-M02808_115_AHB9G_1_1103_24448_13671	2762	49	23	6	49	64	13	109	8	5	5	114	101	25	58	75	65	66	96	46	0	0	57	89	21	72	41	230	354	112	84	80	45	31	84	16	65	53	Ground	Bacteria;Proteobacteria;Alphaproteobacteria;Rhizobiales;Hyphomicrobiaceae;Devosia;Devosia_unclassified
HWI-M02808_115_AHB9G_1_1101_10784_2729	2759	608	12	40	26	52	30	151	27	169	7	58	102	32	3	152	6	4	230	6	0	0	0	0	4	106	3	26	0	16	394	35	26	15	127	33	22	38		Bacteria;Acidobacteria;Acidobacteria;Subgroup_3;Unknown_Family;Bryobacter;uncultured_Holophaga_sp.
HWI-M02808_115_AHB9G_1_1101_20949_3237	2667	226	0	0	0	0	0	1	0	0	1	0	192	63	82	5	136	2	8	25	127	296	269	27	4	12	12	158	376	231	137	2	4	0	0	0	1	0	CASE_Unique	Bacteria;Proteobacteria;Alphaproteobacteria;Rhizobiales;Hyphomicrobiaceae;Rhodomicrobium;uncultured_bacterium
HWI-M02808_115_AHB9G_1_1101_14209_15056	2646	125	17	2	22	222	24	141	1	13	22	96	294	31	7	47	55	0	213	26	13	453	17	456	3	7	0	33	8	14	84	0	0	0	36	0	0	0		Bacteria;Verrucomicrobia;Spartobacteria;Chthoniobacterales;DA101_soil_group;uncultured_Verrucomicrobia_bacterium;uncultured_Verrucomicrobia_bacterium_unclassified
HWI-M02808_115_AHB9G_1_1101_13973_19510	2619	91	0	24	30	55	10	141	1	8	0	50	197	25	115	0	0	0	118	71	0	83	0	197	44	18	0	208	241	95	385	0	79	132	0	0	98	33		Bacteria;Proteobacteria;Betaproteobacteria;Burkholderiales;Comamonadaceae;Comamonadaceae_unclassified;Comamonadaceae_unclassified
HWI-M02808_115_AHB9G_1_1101_9378_5238	2572	132	0	24	68	127	13	102	0	12	10	44	160	42	26	78	108	9	195	54	26	192	56	302	7	0	11	102	52	63	147	33	38	43	7	39	60	29		Bacteria;Bacteroidetes;Sphingobacteriia;Sphingobacteriales;Chitinophagaceae;Chitinophagaceae_unclassified;Chitinophagaceae_unclassified
HWI-M02808_115_AHB9G_1_1105_12949_22890	2563	0	0	0	889	356	22	0	0	1	7	824	0	0	0	2	79	101	46	0	0	0	2	133	9	0	0	0	0	8	0	0	0	0	0	0	0	0		Bacteria;Cyanobacteria;Cyanobacteria;SubsectionV;FamilyI;Stigonema;Stigonema_mamillosum_DHS0072
HWI-M02808_115_AHB9G_1_1104_19946_9397	2548	16	56	192	253	259	261	62	6	255	10	10	22	45	0	513	0	0	0	0	1	0	0	0	72	4	0	1	4	0	30	57	0	0	0	0	0	0		Bacteria;Acidobacteria;Acidobacteria;Subgroup_2;Subgroup_2_unclassified;Subgroup_2_unclassified;Subgroup_2_unclassified
HWI-M02808_177_ANHM9_1_1105_17956_16201	2517	0	66	658	0	0	0	0	141	1571	0	0	0	0	0	0	0	0	0	0	0	0	0	0	0	0	0	0	2	0	0	0	0	0	0	0	0	0		Bacteria;Planctomycetes;Planctomycetacia;Planctomycetales;Planctomycetaceae;Planctomycetaceae_uncultured;Planctomycetaceae_unclassified
HWI-M02808_115_AHB9G_1_1101_5241_18862	2498	72	28	170	15	32	73	145	41	107	40	129	93	75	6	311	29	15	28	43	3	8	9	40	72	158	23	89	33	37	176	19	25	15	29	78	4	22		Bacteria;Proteobacteria;Gammaproteobacteria;Xanthomonadales;Xanthomonadales_Incertae_Sedis;Acidibacter;Acidibacter_unclassified
HWI-M02808_115_AHB9G_1_1102_12696_3887	2452	122	9	0	0	0	0	0	16	0	16	460	0	0	22	0	175	0	73	18	0	44	14	288	0	105	9	80	224	141	208	13	77	56	0	102	98	27		Bacteria;Bacteroidetes;Sphingobacteriia;Sphingobacteriales;Sphingobacteriaceae;Sphingobacteriaceae_unclassified;Sphingobacteriaceae_unclassified
HWI-M02808_115_AHB9G_1_1101_21469_9570	2450	0	0	18	71	116	3	80	0	4	1	12	110	30	50	41	190	34	340	17	28	143	31	167	13	7	10	95	215	117	132	14	21	70	0	22	61	13	CAAT_Inhibited	Bacteria;Bacteroidetes;Sphingobacteriia;Sphingobacteriales;Chitinophagaceae;Chitinophagaceae_uncultured;uncultured_Chitinophagaceae_bacterium
HWI-M02808_115_AHB9G_1_1103_11657_5025	2449	11	326	68	0	0	0	1	1356	255	0	0	0	0	0	0	0	0	0	0	0	0	0	0	0	18	0	0	0	0	0	0	0	0	0	0	0	0		Bacteria;Proteobacteria;Alphaproteobacteria;Rhizobiales;Xanthobacteraceae;Variibacter;Variibacter_unclassified
HWI-M02808_115_AHB9G_1_1101_4849_12058	2432	68	8	56	43	120	62	77	0	23	12	105	59	32	8	21	233	7	49	17	1	22	0	204	15	163	39	62	35	33	116	54	68	96	48	182	92	71		Bacteria;Proteobacteria;Betaproteobacteria;Burkholderiales;Comamonadaceae;Aquincola;uncultured_bacterium
HWI-M02808_115_AHB9G_1_1102_13018_14291	2418	0	40	0	190	140	363	0	72	274	0	101	0	29	0	681	0	0	55	0	0	0	0	0	15	0	0	20	14	6	0	0	1	0	265	0	0	0		Bacteria;Bacteroidetes;Sphingobacteriia;Sphingobacteriales;Chitinophagaceae;Chitinophagaceae_unclassified;Chitinophagaceae_unclassified
HWI-M02808_115_AHB9G_1_1101_24591_14289	2389	53	7	64	162	168	161	73	8	23	57	141	110	78	23	175	66	29	202	36	0	1	23	84	130	14	7	18	24	15	60	2	0	0	37	14	1	22		Bacteria;Actinobacteria;Actinobacteria;Frankiales;Acidothermaceae;Acidothermus;uncultured_bacterium
HWI-M02808_115_AHB9G_1_1101_4651_23882	2366	43	60	38	17	12	85	67	325	52	20	29	23	126	6	96	11	14	30	47	3	2	16	16	95	289	28	28	2	16	9	33	16	54	66	166	29	83		Bacteria;Actinobacteria;Thermoleophilia;Solirubrobacterales;TM146;uncultured_Conexibacteraceae_bacterium;uncultured_Conexibacteraceae_bacterium_unclassified
HWI-M02808_115_AHB9G_1_1110_7287_12900	2353	8	1	5	19	38	3	20	0	0	2	42	29	18	14	0	44	0	48	13	6	24	4	122	6	19	17	267	154	233	148	123	127	81	34	227	328	17	Ground	Bacteria;Proteobacteria;Betaproteobacteria;Burkholderiales;Comamonadaceae;Comamonadaceae_unclassified;Comamonadaceae_unclassified
HWI-M02808_115_AHB9G_1_1102_19650_16217	2319	73	43	188	104	151	104	105	28	205	67	72	104	27	4	271	20	9	66	5	0	0	0	9	32	48	0	22	10	19	87	80	0	4	190	0	0	0		Bacteria;Acidobacteria;Acidobacteria;Acidobacteriales;Acidobacteriaceae_(Subgroup_1);Acidobacterium;uncultured_Acidobacteria_bacterium
HWI-M02808_115_AHB9G_1_1101_16522_4871	2313	115	0	0	0	0	1	0	0	0	0	0	41	0	8	0	53	1	2	0	16	58	43	12	0	17	33	492	435	72	88	27	274	167	0	55	203	36	Ground	Bacteria;Proteobacteria;Gammaproteobacteria;Xanthomonadales;Xanthomonadales_Incertae_Sedis;Acidibacter;Acidibacter_unclassified
HWI-M02808_115_AHB9G_1_1101_12727_22602	2295	81	0	0	0	18	0	0	0	0	0	23	42	8	14	0	26	8	91	14	8	0	5	55	1	180	72	87	94	79	85	259	166	226	83	226	94	174	Ground	Bacteria;Proteobacteria;Gammaproteobacteria;Xanthomonadales;Xanthomonadales_uncultured;uncultured_proteobacterium;uncultured_proteobacterium_unclassified
HWI-M02808_115_AHB9G_1_1106_9760_22284	2267	5	27	485	62	32	434	2	65	522	78	79	4	14	0	259	0	20	0	1	0	0	0	1	25	0	0	0	0	8	5	11	0	0	58	0	0	0		Bacteria;Bacteroidetes;Sphingobacteriia;Sphingobacteriales;Chitinophagaceae;Chitinophagaceae_unclassified;Chitinophagaceae_unclassified
HWI-M02808_115_AHB9G_1_1101_23181_17382	2265	54	0	0	6	45	0	5	0	0	0	35	58	1	20	0	54	0	0	7	0	12	12	61	0	78	40	179	173	233	114	211	145	86	0	316	215	44	Ground	Bacteria;Bacteroidetes;Sphingobacteriia;Sphingobacteriales;Chitinophagaceae;Chitinophagaceae_uncultured;Chitinophagaceae_unclassified
HWI-M02808_177_ANHM9_1_2102_13719_23430	2259	0	0	174	0	2	121	176	3	240	24	347	301	24	0	262	4	0	244	0	2	3	0	243	27	0	0	5	1	0	7	0	0	0	0	0	0	0		Bacteria;Cyanobacteria;Chloroplast;Chloroplast_unclassified;Chloroplast_unclassified;Chloroplast_unclassified;Chloroplast_unclassified
HWI-M02808_115_AHB9G_1_1101_12416_5533	2241	243	88	15	29	304	24	182	29	10	20	34	61	24	18	42	11	9	43	22	0	3	4	18	38	44	20	25	13	27	191	18	48	10	0	69	42	43		Bacteria;Proteobacteria;Alphaproteobacteria;Rhizobiales;Hyphomicrobiaceae;Rhodoplanes;Rhodoplanes_unclassified
HWI-M02808_115_AHB9G_1_1102_15981_21714	2230	22	65	150	121	111	128	38	57	285	78	76	29	45	8	170	24	40	25	22	0	0	0	33	84	27	5	10	14	27	72	7	4	1	38	0	0	23		Bacteria;Proteobacteria;Alphaproteobacteria;Rhizobiales;alphaI_cluster;alphaI_cluster_unclassified;alphaI_cluster_unclassified
HWI-M02808_115_AHB9G_1_1102_22640_13818	2216	134	0	308	0	0	0	301	0	0	26	0	262	0	0	0	0	23	0	45	0	0	0	25	0	211	16	0	0	0	339	211	0	38	0	48	2	133		Bacteria;Bacteroidetes;Sphingobacteriia;Sphingobacteriales;Chitinophagaceae;Chitinophagaceae_unclassified;Chitinophagaceae_unclassified
HWI-M02808_115_AHB9G_1_1101_12303_7624	2208	0	0	0	294	143	0	160	0	0	13	104	275	0	0	0	300	0	275	47	0	0	0	253	23	0	0	0	0	157	151	0	0	0	0	0	0	0		Bacteria;Proteobacteria;Alphaproteobacteria;Rhizobiales;Rhizobiales_Incertae_Sedis;Rhizomicrobium;Rhizomicrobium_unclassified
HWI-M02808_115_AHB9G_1_1103_10777_16275	2205	10	7	14	56	91	42	60	0	0	0	142	99	5	7	11	276	0	55	11	0	6	0	68	1	0	16	172	115	274	129	35	0	68	15	213	0	103		Bacteria;Proteobacteria;Betaproteobacteria;Burkholderiales;Comamonadaceae;Roseateles;uncultured_bacterium
HWI-M02808_115_AHB9G_1_1101_27173_21340	2174	49	40	187	132	165	151	145	32	142	45	72	50	42	8	147	10	49	155	29	0	0	0	0	53	16	3	13	9	15	54	9	2	12	38	2	1	18		Bacteria;Planctomycetes;Phycisphaerae;WD2101_soil_group;WD2101_soil_group_unclassified;WD2101_soil_group_unclassified;WD2101_soil_group_unclassified
HWI-M02808_115_AHB9G_1_1101_7170_13103	2166	144	1	0	15	16	0	35	0	0	0	27	70	9	197	0	103	6	125	22	9	22	32	49	0	8	0	101	363	341	213	6	8	10	2	36	11	33	Ground	Bacteria;Proteobacteria;Gammaproteobacteria;Xanthomonadales;Xanthomonadaceae;Rhodanobacter;uncultured_Xanthomonadaceae_bacterium
HWI-M02808_115_AHB9G_1_1101_19119_6183	2155	41	97	239	75	171	374	34	12	0	58	235	0	20	0	235	1	2	9	4	0	0	0	4	40	6	0	0	0	0	0	19	0	0	113	0	0	0		Bacteria;Actinobacteria;Actinobacteria;Frankiales;Acidothermaceae;Acidothermus;Acidothermus_unclassified
HWI-M02808_115_AHB9G_1_1102_16937_17059	2150	46	0	7	17	78	1	118	0	0	1	122	160	75	39	35	70	33	191	77	97	219	88	0	0	22	11	47	9	39	110	0	108	47	3	11	38	4		Bacteria;Actinobacteria;Actinobacteria;Kineosporiales;Kineosporiaceae;Kineosporia;uncultured_bacterium
HWI-M02808_115_AHB9G_1_1104_17590_19394	2143	15	0	11	148	109	15	59	0	0	0	54	124	55	35	35	188	95	185	53	23	315	78	268	10	0	0	10	0	25	29	0	0	12	0	4	0	0	CASE_Unique	Bacteria;Proteobacteria;Betaproteobacteria;Burkholderiales;Burkholderiales_unclassified;Burkholderiales_unclassified;Burkholderiales_unclassified
HWI-M02808_115_AHB9G_1_1102_5519_23500	2131	0	22	441	116	53	97	0	23	140	63	59	65	56	0	388	5	42	17	29	0	0	0	11	61	0	0	0	15	0	188	0	0	0	0	0	0	0		Bacteria;Proteobacteria;Alphaproteobacteria;Rhizobiales;Bradyrhizobiaceae;Bradyrhizobium;Bradyrhizobium_unclassified
HWI-M02808_115_AHB9G_1_1101_17568_21812	2119	28	0	0	4	189	9	0	0	0	23	78	311	72	83	38	43	19	437	285	20	6	21	76	27	0	0	24	10	19	125	0	2	0	0	0	0	0	CASE_Unique	Bacteria;Actinobacteria;Thermoleophilia;Solirubrobacterales;Patulibacteraceae;Patulibacter;uncultured_bacterium
HWI-M02808_115_AHB9G_1_1106_8360_17193	2072	3	17	97	278	125	55	44	6	25	11	293	85	40	6	180	120	29	54	25	3	71	20	152	18	5	1	11	40	17	105	6	0	0	14	0	0	2		Bacteria;Bacteroidetes;Sphingobacteriia;Sphingobacteriales;Sphingobacteriaceae;Mucilaginibacter;uncultured_soil_bacterium
HWI-M02808_115_AHB9G_1_1101_11674_13761	2069	0	11	0	15	45	0	56	0	0	5	0	4	6	0	0	11	1	0	5	0	0	0	2	15	207	101	157	453	91	64	218	111	0	0	148	90	55	Ground	Bacteria;Proteobacteria;Alphaproteobacteria;Rhodospirillales;Rhodospirillaceae;Dongia;Dongia_unclassified
HWI-M02808_115_AHB9G_1_1101_25669_15327	2043	47	163	231	80	81	185	35	131	48	101	47	4	8	0	149	7	5	0	0	0	0	0	1	64	20	0	0	0	1	1	11	0	0	188	2	0	1		Bacteria;Actinobacteria;Actinobacteria;Frankiales;Acidothermaceae;Acidothermus;Acidothermus_unclassified
HWI-M02808_115_AHB9G_1_1101_7861_18726	2033	49	8	13	32	123	59	5	0	35	17	154	47	27	1	172	10	14	23	3	0	25	5	56	21	160	13	24	53	19	94	144	37	96	217	39	21	156		Bacteria;Proteobacteria;Alphaproteobacteria;Rhizobiales;Rhizobiales_Incertae_Sedis;Rhizomicrobium;uncultured_alpha_proteobacterium
HWI-M02808_115_AHB9G_1_1102_5500_15994	2024	0	0	17	1032	271	14	12	0	22	18	169	0	2	0	28	130	59	139	2	0	0	2	0	26	0	0	1	0	0	0	0	0	0	0	0	0	0		Bacteria;Cyanobacteria;Cyanobacteria;Cyanobacteria_unclassified;Cyanobacteria_unclassified;Cyanobacteria_unclassified;Cyanobacteria_unclassified
HWI-M02808_115_AHB9G_1_1101_18320_18638	2020	0	39	155	94	140	125	0	20	115	35	153	91	22	0	91	52	15	71	7	0	0	0	101	22	0	20	25	50	40	214	72	17	39	0	64	21	0		Bacteria;Proteobacteria;Alphaproteobacteria;Rhizobiales;Rhizobiales_Incertae_Sedis;Rhizomicrobium;uncultured_alpha_proteobacterium
HWI-M02808_115_AHB9G_1_1102_8668_15710	2020	0	44	65	44	62	52	63	0	34	45	47	68	80	47	106	63	75	139	73	25	48	60	80	59	16	18	35	0	45	106	14	7	0	12	7	0	6		Bacteria;Actinobacteria;Thermoleophilia;Thermoleophilia_unclassified;Thermoleophilia_unclassified;Thermoleophilia_unclassified;Thermoleophilia_unclassified
HWI-M02808_115_AHB9G_1_1102_5610_16809	2000	12	29	59	237	106	78	41	13	78	59	127	58	41	22	98	84	73	50	16	9	70	17	128	52	15	1	16	0	16	84	4	0	7	58	18	0	9		Bacteria;Proteobacteria;Alphaproteobacteria;Rhodospirillales;Acetobacteraceae;Acetobacteraceae_uncultured;Acetobacteraceae_unclassified
HWI-M02808_115_AHB9G_1_1101_9023_14252	1990	10	1	0	74	26	46	40	0	8	10	34	75	84	49	70	111	49	148	96	100	206	180	105	56	0	1	9	7	8	0	0	5	0	0	0	0	0	CASE_Unique	Bacteria;Proteobacteria;Alphaproteobacteria;Rhizobiales;Rhizobiales_unclassified;Rhizobiales_unclassified;Rhizobiales_unclassified
HWI-M02808_115_AHB9G_1_1101_14041_18762	1990	32	17	197	47	73	129	27	27	600	25	102	49	34	4	193	6	18	70	6	0	0	2	11	11	0	2	16	12	14	73	2	1	0	84	7	0	3		Bacteria;Acidobacteria;Acidobacteria;Subgroup_3;Unknown_Family;Candidatus_Solibacter;Candidatus_Solibacter_unclassified
HWI-M02808_115_AHB9G_1_1101_25183_11495	1988	298	0	0	0	114	0	51	5	0	3	113	103	0	25	45	84	0	123	31	15	42	10	64	37	14	8	72	147	100	49	48	52	38	12	99	36	26		Bacteria;Verrucomicrobia;Opitutae;Opitutales;Opitutaceae;Opitutus;uncultured_bacterium
HWI-M02808_115_AHB9G_1_1102_23349_7877	1986	168	0	0	3	268	12	59	0	0	1	67	75	16	13	25	92	0	135	31	43	583	27	24	5	0	2	12	0	9	38	16	1	27	1	12	9	36		Bacteria;Bacteroidetes;Sphingobacteriia;Sphingobacteriales;Chitinophagaceae;Chitinophagaceae_uncultured;Chitinophagaceae_unclassified
HWI-M02808_115_AHB9G_1_1102_16027_12331	1975	25	0	116	85	88	123	95	0	101	37	81	53	22	22	120	32	62	99	21	4	1	0	107	65	21	1	35	30	12	74	18	9	0	79	5	23	18		Bacteria;Proteobacteria;Alphaproteobacteria;Rhizobiales;alphaI_cluster;alphaI_cluster_unclassified;alphaI_cluster_unclassified
HWI-M02808_115_AHB9G_1_1101_23149_18060	1964	13	14	7	78	122	41	162	8	60	8	53	135	33	27	112	24	8	273	42	1	0	3	59	27	83	0	93	29	75	183	0	0	0	0	0	0	0		Bacteria;Proteobacteria;Alphaproteobacteria;Rhodospirillales;JG37-AG-20;uncultured_bacterium;uncultured_bacterium_unclassified
HWI-M02808_177_ANHM9_1_1101_14529_5976	1956	0	0	145	1	0	372	0	0	1438	0	0	0	0	0	0	0	0	0	0	0	0	0	0	0	0	0	0	0	0	0	0	0	0	0	0	0	0		Bacteria;Proteobacteria;Gammaproteobacteria;Xanthomonadales;Xanthomonadales_uncultured;uncultured_eubacterium_WD260;uncultured_eubacterium_WD260_unclassified
HWI-M02808_115_AHB9G_1_1103_14580_9384	1953	22	5	0	6	41	0	64	0	0	0	24	142	49	31	10	71	9	106	66	1	4	22	33	0	92	0	335	159	191	264	0	0	55	1	0	0	33	Ground	Bacteria;Proteobacteria;Alphaproteobacteria;Rhodospirillales;Rhodospirillaceae;Dongia;uncultured_bacterium
HWI-M02808_115_AHB9G_1_1102_9137_8207	1936	0	0	0	0	0	0	0	0	0	0	0	0	0	0	0	0	0	0	0	0	0	0	0	0	12	22	0	0	0	0	21	0	123	0	1144	598	7	Ground	Bacteria;Proteobacteria;Gammaproteobacteria;Pseudomonadales;Pseudomonadaceae;Pseudomonas;Pseudomonas_unclassified
HWI-M02808_115_AHB9G_1_1103_6417_22895	1927	2	198	1493	0	0	0	20	213	1	0	0	0	0	0	0	0	0	0	0	0	0	0	0	0	0	0	0	0	0	0	0	0	0	0	0	0	0		Bacteria;Chloroflexi;Ktedonobacteria;Ktedonobacterales;Ktedonobacterales_unclassified;Ktedonobacterales_unclassified;Ktedonobacterales_unclassified
HWI-M02808_115_AHB9G_1_1113_4937_16507	1921	0	0	0	0	0	0	0	0	0	0	4	0	0	13	68	238	9	133	23	69	1082	157	56	3	0	0	0	0	0	5	0	0	0	0	0	0	0	CASE_Unique	Bacteria;Cyanobacteria;Cyanobacteria;SubsectionIV;FamilyI;Nostoc;Nostoc_sp._Nephroma_bellum_cyanobiont
HWI-M02808_115_AHB9G_1_1102_21850_11221	1913	21	1	15	64	82	0	65	3	13	8	54	114	14	16	35	136	31	126	15	11	37	25	113	21	27	45	85	21	73	69	21	0	154	0	155	0	24		Bacteria;Proteobacteria;Betaproteobacteria;Burkholderiales;Comamonadaceae;Comamonadaceae_unclassified;Comamonadaceae_unclassified
HWI-M02808_115_AHB9G_1_1104_18527_12738	1909	6	19	145	73	129	192	57	40	24	57	115	101	119	0	196	0	55	66	56	0	0	0	37	102	0	0	0	0	0	111	0	0	0	4	0	0	1		Bacteria;Actinobacteria;Thermoleophilia;Solirubrobacterales;Solirubrobacterales_unclassified;Solirubrobacterales_unclassified;Solirubrobacterales_unclassified
HWI-M02808_115_AHB9G_1_1103_24528_12720	1894	16	25	52	289	90	107	53	0	37	31	118	72	51	3	362	36	26	111	20	0	6	0	81	56	0	0	0	12	10	85	0	0	1	42	3	0	0		Bacteria;Acidobacteria;Acidobacteria;Acidobacteriales;Acidobacteriaceae_(Subgroup_1);Granulicella;Granulicella_mallensis_MP5ACTX8
HWI-M02808_115_AHB9G_1_1101_20331_4392	1871	420	4	0	8	182	1	112	1	0	1	53	46	32	19	8	5	61	257	43	0	0	0	20	2	0	0	54	17	10	196	113	98	0	0	0	0	0		Bacteria;Acidobacteria;Acidobacteria;Acidobacteriales;Acidobacteriaceae_(Subgroup_1);Acidobacteriaceae_(Subgroup_1)_uncultured;Acidobacteriaceae_(Subgroup_1)_unclassified
HWI-M02808_115_AHB9G_1_1101_10090_7322	1868	40	0	1	16	52	0	208	0	10	0	57	74	10	37	33	50	34	145	66	0	0	0	115	20	11	18	207	0	0	252	95	32	43	12	39	0	55		Bacteria;Proteobacteria;Alphaproteobacteria;Rhizobiales;Rhizobiales_unclassified;Rhizobiales_unclassified;Rhizobiales_unclassified
HWI-M02808_115_AHB9G_1_1101_12541_2314	1850	1850	0	0	0	0	0	0	0	0	0	0	0	0	0	0	0	0	0	0	0	0	0	0	0	0	0	0	0	0	0	0	0	0	0	0	0	0		Bacteria;Acidobacteria;Acidobacteria;Subgroup_4;RB41;RB41_unclassified;RB41_unclassified
HWI-M02808_115_AHB9G_1_1102_8966_3291	1843	0	0	29	270	71	40	51	0	17	13	71	86	15	48	69	194	45	141	20	10	122	50	249	17	0	0	15	1	8	37	0	0	0	0	0	0	0		Bacteria;Acidobacteria;Acidobacteria;Acidobacteriales;Acidobacteriaceae_(Subgroup_1);Acidobacterium;uncultured_Acidobacteria_bacterium
HWI-M02808_115_AHB9G_1_1107_12633_12073	1817	0	19	42	223	164	135	155	0	9	38	72	0	0	0	123	86	6	199	43	0	0	0	96	50	0	0	13	0	0	251	0	0	0	0	0	0	0		Bacteria;Verrucomicrobia;OPB35_soil_group;OPB35_soil_group_unclassified;OPB35_soil_group_unclassified;OPB35_soil_group_unclassified;OPB35_soil_group_unclassified
HWI-M02808_115_AHB9G_1_1101_15000_14519	1812	0	17	36	94	49	48	0	7	28	56	28	37	47	45	49	109	20	87	53	0	67	31	141	29	11	17	62	122	108	151	50	5	0	0	0	5	0		Bacteria;Proteobacteria;Alphaproteobacteria;Caulobacterales;Caulobacteraceae;Caulobacteraceae_uncultured;Caulobacteraceae_unclassified
HWI-M02808_115_AHB9G_1_1103_11858_12989	1811	0	12	0	0	0	0	11	0	0	0	0	0	12	20	0	0	0	146	28	0	0	0	87	0	397	37	88	335	97	0	210	0	0	2	119	0	102	CAAT_Inhibited	Bacteria;Proteobacteria;Deltaproteobacteria;Myxococcales;Haliangiaceae;Haliangium;Haliangium_unclassified
HWI-M02808_115_AHB9G_1_1104_9385_18991	1806	0	0	0	0	0	0	0	0	0	0	0	0	0	0	0	0	0	0	0	0	0	0	0	0	263	90	273	24	0	10	267	275	60	0	183	101	171	Ground	Bacteria;Proteobacteria;Betaproteobacteria;Nitrosomonadales;Nitrosomonadaceae;Nitrosomonadaceae_uncultured;uncultured_Nitrosomonadaceae_bacterium
HWI-M02808_115_AHB9G_1_1101_21779_12962	1803	115	0	0	18	70	0	73	0	0	0	9	44	7	45	9	51	10	473	37	14	4	14	23	0	15	12	103	63	88	119	81	37	44	6	16	12	16		Bacteria;Proteobacteria;Deltaproteobacteria;Myxococcales;Phaselicystidaceae;Phaselicystis;Phaselicystis_unclassified
HWI-M02808_115_AHB9G_1_1103_7454_8970	1778	0	0	31	706	34	12	5	0	11	0	102	76	19	6	30	50	19	176	14	56	100	36	117	25	0	0	0	0	0	0	0	0	0	31	0	0	0		Bacteria;Cyanobacteria;Chloroplast;Chloroplast_unclassified;Chloroplast_unclassified;Chloroplast_unclassified;Chloroplast_unclassified
HWI-M02808_115_AHB9G_1_1101_22609_14207	1736	0	0	0	0	0	0	35	0	0	1	0	0	0	0	0	0	0	0	0	0	0	0	0	0	162	64	138	260	0	222	363	109	120	7	45	78	76	Ground	Bacteria;Proteobacteria;Betaproteobacteria;Nitrosomonadales;Nitrosomonadaceae;Nitrosomonadaceae_uncultured;uncultured_Nitrosomonadaceae_bacterium
HWI-M02808_115_AHB9G_1_1102_13918_3752	1734	20	10	39	87	0	71	178	1	6	0	0	128	1	16	47	246	7	74	9	0	0	0	77	0	19	0	60	200	88	199	3	14	61	1	0	2	11		Bacteria;Bacteroidetes;Cytophagia;Cytophagales;Cytophagaceae;Cytophagaceae_uncultured;uncultured_bacterium
HWI-M02808_115_AHB9G_1_1106_9859_8072	1716	27	31	33	15	40	7	21	48	21	17	19	4	0	0	28	2	6	14	0	0	0	1	0	12	112	67	95	10	51	14	42	180	21	16	198	265	130		Bacteria;Proteobacteria;Alphaproteobacteria;Rhizobiales;Bradyrhizobiaceae;Bradyrhizobium;Bradyrhizobium_unclassified
HWI-M02808_115_AHB9G_1_1101_27626_13473	1711	29	71	201	62	77	89	32	73	92	72	38	13	44	6	68	41	29	22	20	0	14	10	16	33	12	8	12	19	19	30	12	0	7	98	16	22	0		Bacteria;Proteobacteria;Alphaproteobacteria;Rhizobiales;alphaI_cluster;uncultured_bacterium;uncultured_bacterium_unclassified
HWI-M02808_115_AHB9G_1_1102_24145_18194	1704	25	30	116	101	104	168	0	9	0	22	107	47	29	0	102	48	0	0	0	0	32	0	84	0	0	14	31	0	59	0	60	33	33	193	75	46	0		Bacteria;Proteobacteria;Alphaproteobacteria;Rhizobiales;alphaI_cluster;uncultured_forest_soil_bacterium;uncultured_forest_soil_bacterium_unclassified
HWI-M02808_115_AHB9G_1_1112_6348_18425	1691	8	35	144	269	53	77	0	0	264	13	67	7	18	0	101	1	0	2	0	0	0	0	0	29	89	15	4	0	0	0	0	3	0	235	106	0	0		Bacteria;Actinobacteria;Actinobacteria;Frankiales;Acidothermaceae;Acidothermus;uncultured_Actinoallomurus_sp.
HWI-M02808_177_ANHM9_1_1101_17470_23059	1689	0	1	495	0	0	1	0	497	621	28	0	0	0	0	0	0	0	0	0	0	0	0	0	0	2	0	0	3	0	0	1	0	0	2	0	0	0		Bacteria;Actinobacteria;Actinobacteria;Frankiales;Acidothermaceae;Acidothermus;Acidothermus_unclassified
HWI-M02808_115_AHB9G_1_1101_6471_12402	1688	83	4	1	0	26	0	40	0	0	0	19	77	5	11	28	19	2	48	18	0	7	10	17	3	93	30	78	102	55	153	169	142	123	0	113	56	72	Ground	Bacteria;Proteobacteria;Betaproteobacteria;TRA3-20;TRA3-20_unclassified;TRA3-20_unclassified;TRA3-20_unclassified
HWI-M02808_115_AHB9G_1_1101_18546_2549	1685	219	31	6	0	0	0	0	5	1	9	0	0	1	26	1	0	0	0	28	0	7	0	20	0	399	150	0	0	0	0	0	0	105	17	286	0	187		Bacteria;Acidobacteria;Acidobacteria;Subgroup_6;uncultured_forest_soil_bacterium;uncultured_forest_soil_bacterium_unclassified;uncultured_forest_soil_bacterium_unclassified
HWI-M02808_115_AHB9G_1_1102_19795_3421	1665	46	44	48	10	43	40	4	102	186	93	126	225	37	0	378	0	16	10	11	0	0	0	0	36	8	0	0	0	0	18	0	0	0	15	0	0	0		Bacteria;Actinobacteria;Actinobacteria;Actinobacteria_unclassified;Actinobacteria_unclassified;Actinobacteria_unclassified;Actinobacteria_unclassified
HWI-M02808_115_AHB9G_1_1104_11971_10678	1665	0	0	0	0	0	0	0	0	0	0	0	0	0	0	0	0	0	0	0	0	0	0	0	0	20	5	0	0	0	0	26	4	0	0	627	208	773	Ground	Bacteria;Proteobacteria;Betaproteobacteria;Burkholderiales;Burkholderiaceae;Burkholderia;Burkholderia_caribensis
HWI-M02808_115_AHB9G_1_1114_17985_9050	1652	2	8	292	34	10	163	0	7	128	4	86	4	7	0	669	0	0	0	0	0	0	0	0	5	0	0	0	0	0	8	5	0	0	65	0	0	0		Bacteria;Bacteroidetes;Sphingobacteriia;Sphingobacteriales;Chitinophagaceae;Chitinophagaceae_uncultured;Chitinophagaceae_unclassified
HWI-M02808_115_AHB9G_1_1104_21293_11983	1643	13	45	205	84	36	202	25	38	361	30	120	35	13	0	223	8	12	1	0	0	0	0	5	30	0	0	0	0	0	0	2	0	0	76	0	0	0		Bacteria;Acidobacteria;Acidobacteria;Acidobacteriales;Acidobacteriaceae_(Subgroup_1);Acidobacterium;uncultured_Acidobacteria_bacterium
HWI-M02808_115_AHB9G_1_1101_8917_13424	1641	233	1	20	0	0	1	22	0	0	0	17	0	0	0	6	0	0	0	0	0	0	0	1	5	54	33	82	9	36	74	17	26	14	5	550	181	172		Bacteria;Actinobacteria;Actinobacteria;Streptomycetales;Streptomycetaceae;Streptomyces;Streptomyces_unclassified
HWI-M02808_115_AHB9G_1_1103_19212_15218	1634	30	27	22	25	34	0	41	0	22	30	27	64	100	59	157	52	30	121	60	16	31	32	70	0	0	1	12	73	34	127	8	4	2	28	8	0	7		Bacteria;Chloroflexi;TK10;TK10_unclassified;TK10_unclassified;TK10_unclassified;TK10_unclassified
HWI-M02808_115_AHB9G_1_1102_14380_6034	1621	42	6	3	0	1179	2	31	0	4	5	6	11	1	0	7	3	26	0	8	0	0	0	0	0	19	0	0	0	0	186	3	0	0	15	0	0	2		Bacteria;Acidobacteria;Acidobacteria;Acidobacteriales;Acidobacteriaceae_(Subgroup_1);Acidobacteriaceae_(Subgroup_1)_uncultured;Acidobacteriaceae_(Subgroup_1)_unclassified
HWI-M02808_115_AHB9G_1_1101_12267_2013	1614	82	59	40	6	63	72	22	57	18	27	48	19	47	6	68	0	87	47	13	0	0	0	3	55	38	18	9	16	10	115	12	17	17	135	29	20	60		Bacteria;Actinobacteria;Thermoleophilia;Gaiellales;Gaiellales_unclassified;Gaiellales_unclassified;Gaiellales_unclassified
HWI-M02808_115_AHB9G_1_1101_17851_16316	1584	0	0	225	0	0	227	0	6	0	26	0	0	0	9	403	0	121	407	56	0	0	0	0	0	3	0	0	0	27	0	0	0	0	0	0	0	0		Bacteria;Verrucomicrobia;Opitutae;Opitutales;Opitutaceae;Opitutus;Opitutus_unclassified
HWI-M02808_115_AHB9G_1_1101_6795_11317	1578	23	18	88	46	57	67	51	0	101	36	76	62	65	31	61	31	50	128	45	10	1	27	103	0	17	3	30	26	9	76	0	0	0	22	0	0	1		Bacteria;Actinobacteria;Actinobacteria;Frankiales;Frankiales_unclassified;Frankiales_unclassified;Frankiales_unclassified
HWI-M02808_115_AHB9G_1_1108_11701_10909	1574	11	128	388	0	0	173	0	39	181	76	0	0	0	0	377	0	0	0	0	0	0	0	0	0	0	0	0	0	0	0	0	0	0	0	0	0	0		Bacteria;Proteobacteria;Gammaproteobacteria;Xanthomonadales;Xanthomonadales_uncultured;Xanthomonadales_unclassified;Xanthomonadales_unclassified
HWI-M02808_115_AHB9G_1_1101_22438_10095	1571	95	0	3	14	38	0	60	0	0	2	12	30	22	52	3	101	16	52	38	79	32	61	205	6	0	10	67	76	76	139	2	33	13	11	0	0	0	CASE_Unique	Bacteria;Actinobacteria;Thermoleophilia;Solirubrobacterales;480-2;uncultured_bacterium;uncultured_bacterium_unclassified
HWI-M02808_115_AHB9G_1_2106_11818_9255	1551	1	0	2	0	5	0	0	0	1	0	0	0	0	0	0	0	0	0	0	0	0	0	0	0	206	21	52	0	0	0	301	62	304	3	514	32	15	Ground	Bacteria;Proteobacteria;Alphaproteobacteria;Rhizobiales;Xanthobacteraceae;Xanthobacteraceae_unclassified;Xanthobacteraceae_unclassified
HWI-M02808_115_AHB9G_1_2108_10292_12003	1549	0	182	539	0	0	0	12	0	457	27	0	0	0	0	140	0	0	0	0	0	0	0	0	0	0	0	0	0	0	0	0	5	0	120	0	0	0		Bacteria;Planctomycetes;Phycisphaerae;WD2101_soil_group;uncultured_bacterium;uncultured_bacterium_unclassified;uncultured_bacterium_unclassified
HWI-M02808_115_AHB9G_1_1101_24276_4296	1533	263	1	0	0	7	0	40	0	0	0	0	0	0	52	0	8	0	0	17	11	0	0	28	0	65	81	62	63	83	47	44	70	36	0	111	212	22		Bacteria;Acidobacteria;Holophagae;Subgroup_7;Subgroup_7_unclassified;Subgroup_7_unclassified;Subgroup_7_unclassified
HWI-M02808_115_AHB9G_1_1102_13840_1942	1522	20	0	33	96	105	72	187	0	29	9	134	97	6	1	111	45	19	76	16	1	0	0	0	12	34	14	56	49	90	46	0	27	19	9	35	13	21		Bacteria;Bacteroidetes;Sphingobacteriia;Sphingobacteriales;Sphingobacteriaceae;Mucilaginibacter;Mucilaginibacter_unclassified
HWI-M02808_115_AHB9G_1_1102_20501_4424	1520	116	6	5	12	52	0	59	0	0	11	52	68	35	35	14	54	17	78	70	36	52	24	89	10	31	22	45	0	47	82	17	49	13	0	30	36	11		Bacteria;Acidobacteria;Acidobacteria;Subgroup_6;Subgroup_6_unclassified;Subgroup_6_unclassified;Subgroup_6_unclassified
HWI-M02808_115_AHB9G_1_1101_15691_21863	1514	10	0	1	2	3	0	9	8	4	0	1	11	0	0	1	17	0	0	5	0	0	1	0	0	70	9	33	59	27	29	42	15	24	54	467	98	483	Ground	Bacteria;Proteobacteria;Betaproteobacteria;Burkholderiales;Burkholderiaceae;Burkholderia;Burkholderia_unclassified
HWI-M02808_115_AHB9G_1_1111_8179_22003	1513	0	0	0	0	0	0	122	0	0	0	0	114	16	15	0	111	0	144	23	14	69	17	134	0	0	18	52	67	89	260	30	11	8	51	33	16	12	CAAT_Inhibited	Bacteria;Proteobacteria;Alphaproteobacteria;Rhizobiales;Rhizobiales_Incertae_Sedis;Rhizomicrobium;Rhizomicrobium_unclassified
HWI-M02808_115_AHB9G_1_1102_20418_6813	1507	58	3	0	21	89	0	99	0	0	7	23	121	40	19	34	94	14	220	50	21	61	31	73	2	1	0	43	16	31	68	0	1	1	6	0	0	0		Bacteria;Gemmatimonadetes;Gemmatimonadetes;Gemmatimonadales;Gemmatimonadaceae;Gemmatimonas;uncultured_bacterium
HWI-M02808_177_ANHM9_1_1101_12152_10600	1498	0	4	70	173	137	73	51	3	44	26	83	0	43	20	58	69	78	0	28	1	0	42	109	63	0	0	0	0	0	0	9	0	0	32	0	0	0		Bacteria;Proteobacteria;Alphaproteobacteria;Rhodospirillales;Acetobacteraceae;Acetobacteraceae_uncultured;Acetobacteraceae_unclassified
HWI-M02808_115_AHB9G_1_1105_21900_24748	1495	27	85	65	0	8	51	41	168	422	59	26	0	23	0	91	0	0	0	0	0	0	0	0	12	3	0	0	0	0	15	2	0	0	81	0	0	26		Bacteria;Chloroflexi;JG37-AG-4;uncultured_Chloroflexi_bacterium;uncultured_Chloroflexi_bacterium_unclassified;uncultured_Chloroflexi_bacterium_unclassified;uncultured_Chloroflexi_bacterium_unclassified
HWI-M02808_115_AHB9G_1_1101_18864_8208	1485	521	21	3	17	108	4	101	5	0	3	84	0	0	0	71	0	0	1	0	0	0	0	0	5	103	0	2	10	23	30	65	13	23	85	19	14	67		Bacteria;Acidobacteria;Acidobacteria;Subgroup_3;Unknown_Family;Candidatus_Solibacter;Candidatus_Solibacter_unclassified
HWI-M02808_115_AHB9G_1_1101_7679_21592	1478	22	13	112	103	61	68	60	17	69	24	90	69	28	2	77	74	28	145	11	1	0	2	80	22	13	1	13	5	13	24	22	12	9	47	3	23	36		Bacteria;Proteobacteria;Betaproteobacteria;Burkholderiales;Comamonadaceae;Comamonadaceae_unclassified;Comamonadaceae_unclassified
HWI-M02808_115_AHB9G_1_1101_10321_5697	1463	176	1	8	0	167	4	50	0	0	0	130	35	9	26	7	43	9	111	46	8	55	8	85	4	20	1	26	35	33	93	13	22	0	0	26	49	4		Bacteria;Proteobacteria;Alphaproteobacteria;Sphingomonadales;Sphingomonadales_unclassified;Sphingomonadales_unclassified;Sphingomonadales_unclassified
HWI-M02808_115_AHB9G_1_1101_12652_13931	1457	0	0	0	0	52	0	212	253	364	0	0	0	0	0	223	0	0	0	0	0	0	0	0	0	0	4	4	0	0	0	0	7	30	62	19	17	62		Bacteria;Verrucomicrobia;OPB35_soil_group;OPB35_soil_group_unclassified;OPB35_soil_group_unclassified;OPB35_soil_group_unclassified;OPB35_soil_group_unclassified
HWI-M02808_115_AHB9G_1_1105_15530_3475	1454	2	0	3	0	8	0	27	0	0	0	29	49	1	13	31	41	7	123	37	141	147	52	23	0	13	0	94	62	127	157	48	46	0	0	0	26	3	CAAT_Inhibited	Bacteria;Proteobacteria;Deltaproteobacteria;Myxococcales;BIrii41;BIrii41_unclassified;BIrii41_unclassified
HWI-M02808_115_AHB9G_1_1101_16446_11272	1453	7	4	41	128	122	185	11	18	196	44	136	84	17	0	139	24	4	95	12	0	0	2	53	51	0	0	0	0	0	18	0	0	0	0	0	0	0		Bacteria;Acidobacteria;Acidobacteria;Subgroup_3;Unknown_Family;Candidatus_Solibacter;uncultured_Acidobacteria_bacterium
HWI-M02808_177_ANHM9_1_1103_10671_20777	1449	0	15	8	292	79	79	0	4	85	0	116	0	9	0	180	0	0	0	0	0	0	0	0	20	119	10	4	14	13	3	64	72	9	115	21	32	6		Bacteria;Bacteroidetes;Sphingobacteriia;Sphingobacteriales;Chitinophagaceae;Chitinophagaceae_unclassified;Chitinophagaceae_unclassified
HWI-M02808_115_AHB9G_1_1101_10289_8094	1448	0	4	0	79	241	34	0	7	12	0	171	0	10	12	40	176	0	249	0	0	0	0	0	50	0	0	52	183	90	0	0	0	0	16	0	0	0		Bacteria;Bacteroidetes;Sphingobacteriia;Sphingobacteriales;Chitinophagaceae;Chitinophagaceae_unclassified;Chitinophagaceae_unclassified
HWI-M02808_115_AHB9G_1_1102_9777_6516	1447	28	5	2	65	110	1	55	0	0	0	40	87	16	14	25	165	23	113	27	23	185	17	95	0	8	0	33	45	41	75	26	1	4	1	0	0	2		Bacteria;Verrucomicrobia;Opitutae;Opitutales;Opitutaceae;Opitutus;Opitutus_unclassified
HWI-M02808_115_AHB9G_1_1101_13801_20218	1440	0	0	0	10	168	0	2	0	0	0	25	2	82	0	0	14	4	0	1	1	6	0	493	0	0	0	14	4	12	0	2	73	54	6	0	263	38		Bacteria;Proteobacteria;Gammaproteobacteria;Pseudomonadales;Pseudomonadaceae;Pseudomonas;Pseudomonas_unclassified
HWI-M02808_115_AHB9G_1_1102_14494_10796	1440	11	8	35	33	22	7	36	1	33	1	33	49	14	7	7	43	0	99	18	4	7	0	70	5	154	22	54	31	0	47	33	69	60	18	97	142	88		Bacteria;Proteobacteria;Gammaproteobacteria;Xanthomonadales;Xanthomonadales_Incertae_Sedis;Acidibacter;Acidibacter_unclassified
HWI-M02808_115_AHB9G_1_1101_9938_22974	1431	61	6	0	25	98	7	182	0	7	10	82	43	46	10	42	66	15	167	8	0	9	11	17	51	8	5	42	16	17	82	2	22	13	21	0	5	3		Bacteria;Actinobacteria;Actinobacteria;Micromonosporales;Micromonosporaceae;Actinoplanes;Actinoplanes_unclassified
HWI-M02808_177_ANHM9_1_1102_9536_18506	1421	0	23	402	9	24	151	17	186	165	96	27	10	15	0	43	23	77	0	5	0	0	0	0	9	0	0	0	3	4	29	0	0	0	0	0	0	0		Bacteria;Proteobacteria;Deltaproteobacteria;Myxococcales;Polyangiaceae;Sorangium;Sorangium_unclassified
HWI-M02808_115_AHB9G_1_1102_12771_16463	1408	46	83	51	0	0	31	2	869	78	0	0	0	0	0	74	0	16	0	0	0	0	0	0	0	9	0	0	7	0	0	0	0	0	0	0	0	0		Bacteria;Verrucomicrobia;Opitutae;Opitutales;Opitutaceae;Opitutus;Opitutus_unclassified
HWI-M02808_115_AHB9G_1_1109_16060_22538	1408	50	0	0	0	29	1	43	0	0	0	21	196	20	41	10	96	8	115	34	46	216	43	95	6	4	4	23	34	43	85	0	21	13	1	7	19	0	CAAT_Inhibited	Bacteria;Bacteroidetes;Sphingobacteriia;Sphingobacteriales;Chitinophagaceae;Ferruginibacter;Ferruginibacter_unclassified
HWI-M02808_115_AHB9G_1_1109_17405_8635	1406	11	13	127	0	27	0	0	14	0	0	0	0	7	0	92	0	0	0	0	0	0	1	0	0	29	22	27	32	37	0	17	0	0	261	97	0	350		Bacteria;Proteobacteria;Betaproteobacteria;Burkholderiales;Burkholderiaceae;Burkholderia;Burkholderia_fungorum
HWI-M02808_115_AHB9G_1_1101_20205_11973	1394	53	0	0	0	0	0	0	0	0	0	0	0	0	0	0	0	0	0	0	0	0	0	0	0	127	36	156	39	207	23	264	167	94	0	89	77	35	Ground	Bacteria;Bacteroidetes;Cytophagia;Cytophagales;Cytophagaceae;Cytophagaceae_uncultured;uncultured_Ohtaekwangia_sp.
HWI-M02808_115_AHB9G_1_1101_18615_3668	1394	20	1	0	14	2	0	4	0	0	0	0	20	3	203	0	0	0	24	10	545	244	48	19	0	0	15	15	57	24	20	0	27	33	0	2	0	0	CASE_Unique	Bacteria;Fibrobacteres;Fibrobacteria;Fibrobacterales;Fibrobacteraceae;possible_genus_04;uncultured_bacterium
HWI-M02808_115_AHB9G_1_1101_7898_15254	1389	22	9	68	84	209	85	65	8	35	18	140	112	48	0	98	0	31	9	10	0	0	0	22	28	18	0	0	9	16	108	11	0	0	17	2	0	12		Bacteria;Bacteroidetes;Sphingobacteriia;Sphingobacteriales;Chitinophagaceae;Chitinophagaceae_uncultured;uncultured_soil_bacterium
HWI-M02808_115_AHB9G_1_1102_8596_12656	1387	46	4	0	0	1	0	625	0	0	0	137	10	15	3	5	12	67	0	4	0	0	1	25	0	83	0	34	35	48	82	0	0	0	8	0	0	0		Bacteria;Chloroflexi;Ktedonobacteria;Ktedonobacterales;Thermosporotrichaceae;Thermosporotrichaceae_uncultured;uncultured_soil_bacterium
HWI-M02808_115_AHB9G_1_1112_25736_21735	1376	6	0	0	0	6	0	0	0	0	0	1	24	0	51	0	23	5	35	31	202	370	77	50	1	0	0	0	13	11	21	0	0	0	0	0	0	0	CASE_Unique	Bacteria;Actinobacteria;Thermoleophilia;Solirubrobacterales;Solirubrobacterales_unclassified;Solirubrobacterales_unclassified;Solirubrobacterales_unclassified
HWI-M02808_115_AHB9G_1_2113_25483_12000	1371	0	0	0	0	0	0	0	0	0	0	0	0	0	0	0	0	0	0	0	12	0	2	0	0	20	0	155	0	0	0	124	108	50	0	452	305	130	Ground	Bacteria;Proteobacteria;Betaproteobacteria;Burkholderiales;Comamonadaceae;Variovorax;Variovorax_soli
HWI-M02808_115_AHB9G_1_1102_11862_6909	1363	54	12	0	0	0	357	0	0	572	0	0	0	0	0	0	0	0	0	0	0	0	1	0	52	0	0	0	0	0	16	2	0	0	211	0	0	0		Bacteria;Bacteroidetes;Sphingobacteriia;Sphingobacteriales;Sphingobacteriaceae;Mucilaginibacter;Mucilaginibacter_unclassified
HWI-M02808_177_ANHM9_1_1103_10990_5380	1355	0	9	0	0	0	0	0	0	0	0	0	0	0	0	0	0	0	0	0	0	0	0	0	0	114	49	44	0	14	0	38	176	94	0	329	228	214	Ground	Bacteria;Proteobacteria;Alphaproteobacteria;Rhizobiales;Xanthobacteraceae;Xanthobacteraceae_unclassified;Xanthobacteraceae_unclassified
HWI-M02808_115_AHB9G_1_1102_29308_13632	1351	79	1	5	44	84	9	134	0	0	0	98	41	0	0	0	17	0	0	6	0	0	0	0	8	11	23	70	36	251	41	38	52	16	23	140	55	20		Bacteria;Bacteroidetes;Sphingobacteriia;Sphingobacteriales;Chitinophagaceae;Chitinophagaceae_unclassified;Chitinophagaceae_unclassified
HWI-M02808_115_AHB9G_1_1113_13009_10390	1347	0	5	90	31	34	92	14	8	208	13	100	39	29	0	537	0	0	2	0	0	0	0	0	12	5	0	0	11	0	20	0	0	0	39	0	0	9		Bacteria;Actinobacteria;Acidimicrobiia;Acidimicrobiales;Acidimicrobiales_uncultured;Acidimicrobiales_unclassified;Acidimicrobiales_unclassified
HWI-M02808_115_AHB9G_1_1102_7762_10049	1337	40	60	49	12	28	15	3	366	224	96	80	1	20	0	65	0	10	4	3	0	0	0	0	10	0	0	0	0	0	0	0	0	0	0	0	0	0		Bacteria;Actinobacteria;Thermoleophilia;Solirubrobacterales;YNPFFP1;uncultured_bacterium;uncultured_bacterium_unclassified
HWI-M02808_115_AHB9G_1_1111_13876_19322	1334	0	0	12	228	0	15	18	0	32	10	0	45	0	30	81	106	51	157	24	14	109	35	180	48	0	0	5	5	0	0	0	0	0	1	0	0	0		Bacteria;Proteobacteria;Alphaproteobacteria;Rhizobiales;Rhizobiales_unclassified;Rhizobiales_unclassified;Rhizobiales_unclassified
HWI-M02808_115_AHB9G_1_1101_3756_9472	1331	309	0	0	5	1	0	3	0	0	0	7	32	0	9	0	23	5	60	18	0	8	3	22	0	89	33	278	33	54	51	30	68	14	1	53	66	0		Bacteria;Proteobacteria;Alphaproteobacteria;Rhizobiales;Bradyrhizobiaceae;Bradyrhizobium;Bradyrhizobium_unclassified
HWI-M02808_115_AHB9G_1_1107_17706_13705	1328	14	0	0	0	25	0	0	0	0	0	8	22	0	0	0	37	0	0	6	1	0	3	0	0	19	50	212	233	241	121	33	85	14	0	81	20	6	Ground	Bacteria;Proteobacteria;Alphaproteobacteria;Rhodospirillales;Rhodospirillaceae;Dongia;Dongia_unclassified
HWI-M02808_115_AHB9G_1_1101_23407_15026	1325	255	0	2	0	0	0	0	0	0	0	75	44	0	17	0	35	0	65	0	0	13	20	11	0	11	11	159	143	26	32	74	75	1	0	19	169	14		Bacteria;Proteobacteria;Alphaproteobacteria;Rhizobiales;MNG7;MNG7_unclassified;MNG7_unclassified
HWI-M02808_115_AHB9G_1_1101_3502_15078	1323	56	27	120	6	33	131	69	48	198	23	37	35	16	5	57	15	11	45	20	5	18	6	10	25	0	0	17	21	4	87	0	0	0	0	0	5	0		Bacteria;Proteobacteria;Alphaproteobacteria;Rhodospirillales;Acetobacteraceae;Acetobacteraceae_uncultured;Acetobacteraceae_unclassified
HWI-M02808_115_AHB9G_1_1105_22892_10233	1315	17	0	25	2	7	0	8	0	1	4	0	34	20	0	21	198	15	10	8	9	35	21	275	0	0	33	54	38	37	186	0	34	4	7	31	20	8	CAAT_Inhibited	Bacteria;Proteobacteria;Gammaproteobacteria;Xanthomonadales;Xanthomonadaceae;Luteibacter;Luteibacter_rhizovicinus
HWI-M02808_115_AHB9G_1_1105_11291_7997	1313	0	0	0	6	35	1	15	0	0	0	12	64	38	22	0	42	5	98	30	30	457	69	254	0	0	0	15	1	0	10	0	0	0	0	0	0	0	CASE_Unique	Bacteria;Verrucomicrobia;Spartobacteria;Chthoniobacterales;DA101_soil_group;DA101_soil_group_unclassified;DA101_soil_group_unclassified
HWI-M02808_115_AHB9G_1_1102_16801_12263	1313	25	6	49	61	79	18	47	0	14	8	59	37	7	10	43	24	9	32	13	0	33	5	61	3	52	11	90	126	15	99	64	13	25	33	26	18	31		Bacteria;Proteobacteria;Alphaproteobacteria;Rhizobiales;Rhizobiales_Incertae_Sedis;Rhizomicrobium;Rhizomicrobium_unclassified
HWI-M02808_115_AHB9G_1_1101_11085_7120	1309	348	0	0	9	67	0	142	0	0	0	161	95	16	1	7	34	8	23	39	4	2	4	23	4	74	0	15	61	35	82	0	1	0	0	0	0	0		Bacteria;Acidobacteria;Acidobacteria;Acidobacteriales;Acidobacteriaceae_(Subgroup_1);Acidobacteriaceae_(Subgroup_1)_uncultured;Acidobacteriaceae_(Subgroup_1)_unclassified
HWI-M02808_115_AHB9G_1_1107_6621_14305	1308	0	28	132	129	0	143	92	18	79	0	0	0	47	0	165	131	0	0	33	11	0	0	0	0	0	0	28	0	28	105	0	9	2	0	0	0	12		Bacteria;Actinobacteria;Actinobacteria;Frankiales;Frankiaceae;Jatrophihabitans;Jatrophihabitans_unclassified
HWI-M02808_115_AHB9G_1_1105_12034_18090	1297	9	6	201	172	68	141	39	6	119	12	100	120	12	0	133	4	7	39	11	0	1	0	8	9	12	0	0	0	0	0	4	0	0	0	0	0	0		Bacteria;Bacteroidetes;Sphingobacteriia;Sphingobacteriales;Sphingobacteriaceae;Mucilaginibacter;Mucilaginibacter_unclassified
HWI-M02808_115_AHB9G_1_1102_17283_15867	1296	0	0	0	0	53	0	50	0	0	0	144	3	0	0	0	0	26	0	0	0	0	8	0	0	0	0	81	144	70	67	70	244	0	0	0	251	0		Bacteria;Acidobacteria;Acidobacteria;Subgroup_6;Subgroup_6_unclassified;Subgroup_6_unclassified;Subgroup_6_unclassified
HWI-M02808_115_AHB9G_1_1102_15709_14735	1290	5	11	108	120	91	117	36	11	96	49	113	10	42	0	70	11	72	8	0	0	1	0	48	73	0	0	5	0	3	15	4	0	0	4	0	0	0		Bacteria;Proteobacteria;Alphaproteobacteria;Rhodospirillales;Acetobacteraceae;Acidisoma;uncultured_bacterium
HWI-M02808_115_AHB9G_1_1101_12260_3866	1273	91	7	75	13	116	86	9	7	276	22	97	71	5	5	118	1	6	61	1	0	24	0	13	10	8	0	13	3	10	36	10	0	0	30	0	0	0		Bacteria;Actinobacteria;Actinobacteria;Pseudonocardiales;Pseudonocardiaceae;Pseudonocardiaceae_unclassified;Pseudonocardiaceae_unclassified
HWI-M02808_115_AHB9G_1_1102_14829_10502	1265	68	4	0	12	33	0	0	0	0	0	8	67	4	9	0	17	0	35	4	3	46	13	69	0	0	22	66	137	99	78	162	72	47	0	78	78	0	Ground	Bacteria;Acidobacteria;Acidobacteria;Subgroup_3;Unknown_Family;Bryobacter;Bryobacter_unclassified
HWI-M02808_115_AHB9G_1_1101_22335_11551	1259	0	0	0	0	0	374	0	0	0	0	0	0	0	76	0	0	0	0	0	0	0	0	584	0	0	0	0	0	0	0	0	0	0	0	0	169	0		Bacteria;Bacteroidetes;Sphingobacteriia;Sphingobacteriales;Chitinophagaceae;Chitinophagaceae_unclassified;Chitinophagaceae_unclassified
HWI-M02808_115_AHB9G_1_1101_17408_25816	1257	152	15	0	0	271	0	51	0	0	0	0	46	11	6	32	0	0	0	0	0	0	0	0	0	115	8	7	73	7	82	52	22	12	115	13	7	41		Bacteria;Proteobacteria;Alphaproteobacteria;Rhodospirillales;JG37-AG-20;uncultured_bacterium;uncultured_bacterium_unclassified
HWI-M02808_115_AHB9G_1_1101_25569_21389	1252	110	7	1	14	15	0	9	0	0	0	12	38	12	34	1	14	24	14	0	9	3	17	6	11	19	49	49	167	219	25	0	39	8	1	71	170	0	Ground	Bacteria;Actinobacteria;Thermoleophilia;Solirubrobacterales;480-2;uncultured_Rubrobacteraceae_bacterium;uncultured_Rubrobacteraceae_bacterium_unclassified
HWI-M02808_177_ANHM9_1_1102_8155_8437	1249	0	29	0	0	0	11	61	43	0	0	0	0	0	0	0	0	0	20	7	0	2	0	4	1	83	32	164	35	50	265	34	23	43	0	63	79	42	Ground	Bacteria;Proteobacteria;Gammaproteobacteria;Xanthomonadales;Xanthomonadaceae;Rhodanobacter;uncultured_Xanthomonadaceae_bacterium
HWI-M02808_115_AHB9G_1_1101_19664_2787	1243	0	0	0	0	0	0	0	0	0	0	0	0	0	0	0	0	0	0	0	0	0	0	0	0	1191	0	23	0	0	0	0	0	0	0	0	0	0	GRPE_Unique	Bacteria;Proteobacteria;Gammaproteobacteria;Xanthomonadales;Xanthomonadales_Incertae_Sedis;Steroidobacter;bacterium_MI-37
HWI-M02808_115_AHB9G_1_1102_15797_15791	1241	23	20	218	0	0	365	0	55	450	22	0	0	0	0	5	0	0	0	0	0	0	0	0	1	0	0	0	0	0	0	0	0	0	15	0	0	0		Bacteria;Verrucomicrobia;Opitutae;Opitutales;Opitutaceae;Opitutus;uncultured_bacterium
HWI-M02808_115_AHB9G_1_1101_10749_19027	1240	0	0	0	0	51	15	61	0	0	0	0	0	37	0	58	0	43	0	0	0	0	0	0	13	63	21	243	113	172	0	45	45	35	7	0	100	26	Ground	Bacteria;Proteobacteria;Alphaproteobacteria;Sphingomonadales;Sphingomonadaceae;Sphingomonas;Sphingomonas_unclassified
HWI-M02808_177_ANHM9_1_1103_20989_13907	1235	0	7	22	109	68	305	7	4	54	21	117	141	30	0	118	3	11	21	29	0	0	0	2	9	4	1	4	0	4	19	4	0	0	10	0	0	6		Bacteria;Acidobacteria;Acidobacteria;Acidobacteriales;Acidobacteriaceae_(Subgroup_1);Acidobacteriaceae_(Subgroup_1)_uncultured;Acidobacteriaceae_(Subgroup_1)_unclassified
HWI-M02808_115_AHB9G_1_1101_22977_7628	1235	0	0	0	0	0	0	0	0	0	0	0	0	0	0	0	0	0	0	0	0	0	0	0	0	352	17	61	0	8	0	0	0	97	16	220	3	429	Ground	Bacteria;Proteobacteria;Betaproteobacteria;Nitrosomonadales;Nitrosomonadaceae;Nitrosomonadaceae_uncultured;uncultured_delta_proteobacterium
HWI-M02808_115_AHB9G_1_1102_17917_11826	1229	37	26	115	124	195	165	0	19	57	16	172	0	0	0	129	0	23	0	0	0	0	0	0	20	51	0	0	0	0	0	0	0	0	0	0	0	0		Bacteria;Proteobacteria;Alphaproteobacteria;Rhizobiales;Rhizobiales_Incertae_Sedis;Rhizomicrobium;Rhizomicrobium_unclassified
HWI-M02808_115_AHB9G_1_1102_21100_3370	1227	66	0	0	0	0	0	0	0	0	0	0	62	0	24	0	52	8	82	26	21	105	19	43	0	0	15	65	72	124	37	27	88	20	0	55	124	16	CAAT_Inhibited	Bacteria;Proteobacteria;Alphaproteobacteria;Rhizobiales;Bradyrhizobiaceae;Bradyrhizobiaceae_unclassified;Bradyrhizobiaceae_unclassified
HWI-M02808_115_AHB9G_1_1102_18761_9293	1226	71	0	34	0	0	108	103	0	59	0	0	71	27	17	14	97	16	159	27	2	50	13	138	0	18	5	0	72	0	0	0	0	0	22	0	0	0		Bacteria;Acidobacteria;Acidobacteria;Subgroup_3;Unknown_Family;Candidatus_Solibacter;uncultured_Acidobacteria_bacterium
HWI-M02808_115_AHB9G_1_1101_9889_23260	1222	55	0	13	29	56	15	85	0	0	0	73	103	18	8	37	42	18	107	45	2	26	12	71	6	29	3	16	34	47	106	35	16	0	19	15	0	14		Bacteria;Proteobacteria;Alphaproteobacteria;Rhizobiales;KF-JG30-B3;uncultured_bacterium;uncultured_bacterium_unclassified
HWI-M02808_115_AHB9G_1_1103_23395_22877	1217	0	0	0	0	0	0	0	0	0	0	0	9	0	7	0	2	0	0	0	22	5	42	0	0	0	15	440	0	194	0	0	283	0	0	109	52	0	CAAT_Inhibited	Bacteria;Proteobacteria;Gammaproteobacteria;Xanthomonadales;Xanthomonadales_Incertae_Sedis;Acidibacter;Acidibacter_unclassified
HWI-M02808_115_AHB9G_1_1102_3377_15967	1216	39	14	60	89	69	19	21	7	36	19	62	80	27	0	195	97	26	35	24	2	0	0	59	19	3	0	6	15	0	26	0	0	0	99	0	0	7		Bacteria;Acidobacteria;Acidobacteria;Acidobacteriales;Acidobacteriaceae_(Subgroup_1);Granulicella;Granulicella_unclassified
HWI-M02808_115_AHB9G_1_2109_20319_4987	1208	2	3	1	0	14	0	17	0	1	0	0	18	0	8	13	58	18	25	3	6	18	8	69	2	49	65	69	99	111	70	13	90	52	4	86	87	53	CAAT_Inhibited	Bacteria;Actinobacteria;Actinobacteria;Micrococcales;Microbacteriaceae;Lysinimonas;uncultured_actinobacterium
HWI-M02808_115_AHB9G_1_1101_22378_12126	1200	29	0	0	3	11	0	49	0	0	0	36	45	15	13	4	20	10	63	7	1	45	0	384	0	0	1	186	93	50	32	0	23	3	0	14	20	5	CAAT_Inhibited	Bacteria;Proteobacteria;Alphaproteobacteria;Caulobacterales;Hyphomonadaceae;Woodsholea;uncultured_bacterium
HWI-M02808_115_AHB9G_1_2108_20567_14952	1189	2	0	9	82	67	88	12	0	5	10	361	112	25	0	116	6	1	21	5	0	0	0	2	31	5	5	26	3	11	15	40	5	6	8	14	0	51		Bacteria;Proteobacteria;Gammaproteobacteria;Xanthomonadales;Xanthomonadaceae;Rhodanobacter;Rhodanobacter_unclassified
HWI-M02808_115_AHB9G_1_1101_16845_21104	1188	79	0	0	0	18	0	15	0	0	1	114	22	14	0	0	37	32	19	4	14	19	69	50	3	36	24	95	135	60	14	9	62	13	1	77	20	14		Bacteria;Actinobacteria;Thermoleophilia;Solirubrobacterales;Solirubrobacterales_unclassified;Solirubrobacterales_unclassified;Solirubrobacterales_unclassified
HWI-M02808_177_ANHM9_1_1102_24329_14427	1183	0	0	266	0	0	108	7	0	106	46	0	0	50	0	293	0	60	0	0	0	0	0	0	0	0	0	0	0	0	0	2	0	2	150	0	0	0		Bacteria;Actinobacteria;Thermoleophilia;Solirubrobacterales;Solirubrobacterales_unclassified;Solirubrobacterales_unclassified;Solirubrobacterales_unclassified
HWI-M02808_115_AHB9G_1_1103_12681_2639	1174	19	4	0	8	4	6	94	0	0	0	66	132	15	19	83	81	9	142	33	0	33	14	30	0	24	3	39	39	50	61	5	28	15	0	27	14	0		Bacteria;Bacteroidetes;Sphingobacteriia;Sphingobacteriales;Chitinophagaceae;Sediminibacterium;Sediminibacterium_unclassified
HWI-M02808_115_AHB9G_1_1101_10785_18573	1171	0	24	0	0	35	33	63	10	0	0	35	91	20	2	122	27	13	69	19	0	0	6	80	26	126	8	0	36	100	58	0	61	49	0	0	0	0		Bacteria;Bacteroidetes;Sphingobacteriia;Sphingobacteriales;Chitinophagaceae;Chitinophagaceae_uncultured;Chitinophagaceae_unclassified
HWI-M02808_115_AHB9G_1_1101_28479_16226	1168	0	0	49	153	0	0	48	9	0	15	140	45	28	0	69	0	0	0	0	0	0	0	0	0	156	9	0	0	0	0	0	39	0	0	122	97	145		Bacteria;Bacteroidetes;Sphingobacteriia;Sphingobacteriales;Sphingobacteriaceae;Mucilaginibacter;Mucilaginibacter_unclassified
HWI-M02808_115_AHB9G_1_1101_13302_11209	1162	47	147	114	49	80	34	78	0	0	6	37	0	30	0	11	1	41	92	0	0	3	1	6	51	25	0	7	3	2	59	0	0	0	9	0	0	0		Bacteria;Acidobacteria;Acidobacteria;Subgroup_2;Subgroup_2_unclassified;Subgroup_2_unclassified;Subgroup_2_unclassified
HWI-M02808_115_AHB9G_1_1113_4727_17066	1162	0	0	0	108	0	0	38	0	0	0	118	35	13	20	0	108	47	96	7	0	47	12	147	8	52	12	20	2	13	36	32	4	29	43	0	0	41		Bacteria;Proteobacteria;Gammaproteobacteria;Xanthomonadales;Xanthomonadales_uncultured;Xanthomonadales_unclassified;Xanthomonadales_unclassified
HWI-M02808_115_AHB9G_1_1104_3885_10734	1160	0	0	82	306	295	39	18	0	21	0	0	173	27	0	126	0	19	0	0	0	0	0	0	15	0	0	0	0	0	0	0	0	0	0	0	0	0		Bacteria;Bacteroidetes;Sphingobacteriia;Sphingobacteriales;Sphingobacteriaceae;Mucilaginibacter;Mucilaginibacter_unclassified
HWI-M02808_115_AHB9G_1_1111_3915_17279	1152	0	0	0	0	0	0	0	0	0	0	0	107	116	24	0	256	0	32	4	228	10	100	0	0	0	0	4	0	230	0	0	0	0	0	0	0	0	CASE_Unique	Bacteria;Acidobacteria;Acidobacteria;Subgroup_4;RB41;RB41_unclassified;RB41_unclassified
HWI-M02808_115_AHB9G_1_1101_23101_14575	1148	145	0	13	42	41	0	51	0	0	0	19	28	6	0	21	19	5	91	10	0	0	0	73	7	113	6	45	9	11	40	116	7	33	11	102	4	70		Bacteria;Bacteroidetes;Sphingobacteriia;Sphingobacteriales;Chitinophagaceae;Chitinophagaceae_unclassified;Chitinophagaceae_unclassified
HWI-M02808_115_AHB9G_1_2101_22862_13562	1142	0	0	51	75	26	43	64	0	0	35	46	66	40	11	72	34	20	50	30	0	18	9	73	20	31	3	22	4	11	54	13	0	4	0	0	0	11		Bacteria;Proteobacteria;Alphaproteobacteria;Rhodospirillales;Rhodospirillaceae;Inquilinus;Inquilinus_unclassified
HWI-M02808_115_AHB9G_1_1103_11518_19332	1139	12	0	42	1	289	0	10	0	48	24	170	0	18	0	75	10	11	0	8	0	0	0	0	0	97	5	38	35	0	101	24	6	6	0	35	6	29		Bacteria;Proteobacteria;Alphaproteobacteria;Rhizobiales;Rhizobiales_Incertae_Sedis;Rhizomicrobium;Rhizomicrobium_unclassified
HWI-M02808_115_AHB9G_1_2109_10634_17005	1138	0	0	0	0	0	0	0	0	0	0	0	0	0	0	0	0	0	0	0	0	0	0	0	0	0	0	0	0	0	0	0	361	0	0	0	777	0	Ground	Bacteria;Proteobacteria;Betaproteobacteria;Burkholderiales;Comamonadaceae;Comamonadaceae_unclassified;Comamonadaceae_unclassified
HWI-M02808_115_AHB9G_1_1101_17367_17379	1134	0	0	0	0	0	0	0	0	0	0	0	0	0	0	0	0	0	0	0	0	0	0	0	0	140	14	99	321	15	4	192	76	176	0	0	0	75	Ground	Bacteria;Bacteroidetes;Cytophagia;Cytophagales;Cytophagaceae;Cytophagaceae_uncultured;uncultured_bacterium
HWI-M02808_115_AHB9G_1_1112_15817_11057	1129	3	1	0	2	4	4	14	0	0	0	6	48	5	5	1	58	6	10	0	2	28	8	30	0	18	2	25	0	40	8	199	23	25	2	440	94	0	CAAT_Inhibited	Bacteria;Proteobacteria;Betaproteobacteria;Burkholderiales;Oxalobacteraceae;Massilia;Massilia_unclassified
HWI-M02808_115_AHB9G_1_1101_17860_2365	1129	0	8	0	31	71	7	94	0	0	4	18	50	4	33	0	1	1	0	9	0	0	0	0	1	12	31	18	63	119	201	93	0	20	0	0	0	0		Bacteria;Proteobacteria;Deltaproteobacteria;Myxococcales;Phaselicystidaceae;Phaselicystis;Phaselicystis_unclassified
HWI-M02808_115_AHB9G_1_2109_9779_27554	1114	0	1	23	28	46	24	94	0	17	20	62	110	27	12	78	87	31	115	31	2	23	15	87	39	3	0	14	1	14	22	3	0	2	4	0	0	0		Bacteria;Proteobacteria;Alphaproteobacteria;Rhizobiales;Bradyrhizobiaceae;Bradyrhizobiaceae_unclassified;Bradyrhizobiaceae_unclassified
HWI-M02808_115_AHB9G_1_1104_20236_6704	1109	13	12	32	0	17	14	0	9	14	0	0	2	3	0	2	2	7	0	1	0	0	0	0	0	212	72	23	0	0	17	101	116	87	0	92	76	126	Ground	Bacteria;Proteobacteria;Alphaproteobacteria;Rhodospirillales;Rhodospirillales_Incertae_Sedis;Reyranella;Reyranella_unclassified
HWI-M02808_115_AHB9G_1_1107_6192_14125	1106	16	18	7	24	133	19	10	8	0	8	31	3	3	0	28	0	8	1	0	0	0	0	7	7	14	2	12	9	2	189	31	5	0	474	0	0	20	Ground	Bacteria;Bacteroidetes;Sphingobacteriia;Sphingobacteriales;Sphingobacteriaceae;Mucilaginibacter;Mucilaginibacter_unclassified
HWI-M02808_115_AHB9G_1_1104_19581_21392	1103	32	66	189	0	0	124	0	131	249	35	0	0	0	0	12	0	0	0	0	0	0	0	0	3	12	0	0	0	0	0	9	0	0	0	0	0	0		Bacteria;Proteobacteria;Alphaproteobacteria;Rhizobiales;Xanthobacteraceae;Variibacter;Variibacter_unclassified
HWI-M02808_115_AHB9G_1_1105_8991_21654	1100	26	15	27	0	12	2	57	0	21	0	0	11	1	0	0	11	0	46	19	7	0	11	0	0	87	47	0	0	0	73	75	98	44	0	107	108	108		Bacteria;Proteobacteria;Alphaproteobacteria;Rhizobiales;Xanthobacteraceae;Variibacter;uncultured_Hyphomicrobiaceae_bacterium
HWI-M02808_115_AHB9G_1_1101_6276_13732	1098	67	0	0	0	48	45	178	11	150	8	46	44	0	3	0	49	13	30	10	0	0	0	0	17	0	0	31	23	23	221	0	0	0	29	0	0	0		Bacteria;Verrucomicrobia;Spartobacteria;Chthoniobacterales;Chthoniobacteraceae;Chthoniobacter;Chthoniobacter_unclassified
HWI-M02808_115_AHB9G_1_1102_4673_21822	1096	38	17	11	67	114	58	0	2	0	27	57	60	79	0	276	0	0	0	5	0	0	0	0	46	0	0	0	0	0	19	0	0	0	30	0	0	0		Bacteria;Actinobacteria;Actinobacteria;Micromonosporales;Micromonosporaceae;Micromonosporaceae_unclassified;Micromonosporaceae_unclassified
HWI-M02808_177_ANHM9_1_1102_9285_20852	1096	0	0	0	0	0	0	0	0	0	0	0	0	0	0	0	0	0	0	0	0	0	0	0	1	261	0	41	0	0	0	110	0	176	0	421	0	0	Ground	Bacteria;Acidobacteria;Acidobacteria;Subgroup_6;Subgroup_6_unclassified;Subgroup_6_unclassified;Subgroup_6_unclassified
HWI-M02808_115_AHB9G_1_2105_17704_27584	1095	0	0	2	0	59	5	39	1	0	0	40	29	4	0	5	21	20	29	8	0	0	3	22	1	95	20	48	181	56	102	73	0	26	13	95	21	45	Ground	Bacteria;Proteobacteria;Alphaproteobacteria;Rhizobiales;Rhizobiales_Incertae_Sedis;Rhizomicrobium;Rhizomicrobium_unclassified
HWI-M02808_115_AHB9G_1_1105_24801_12708	1095	23	10	175	23	21	236	14	51	53	9	35	29	2	0	102	0	2	0	5	0	0	1	2	7	32	0	0	7	0	124	7	0	0	44	0	0	3		Bacteria;Bacteroidetes;Sphingobacteriia;Sphingobacteriales;Chitinophagaceae;Chitinophagaceae_unclassified;Chitinophagaceae_unclassified
HWI-M02808_115_AHB9G_1_1112_3573_17456	1092	0	0	3	0	7	23	1	0	0	0	0	22	0	1	33	827	62	63	4	0	0	0	3	0	0	0	15	0	3	3	0	0	8	0	0	0	0	CASE_Unique	Bacteria;Cyanobacteria;Chloroplast;Chloroplast_unclassified;Chloroplast_unclassified;Chloroplast_unclassified;Chloroplast_unclassified
HWI-M02808_115_AHB9G_1_1101_20135_3757	1090	33	269	3	0	8	24	22	4	0	0	0	6	18	0	124	1	0	0	5	0	0	3	4	91	33	11	0	0	11	0	4	37	0	5	83	21	8		Bacteria;Proteobacteria;Alphaproteobacteria;Rhizobiales;Bradyrhizobiaceae;Bradyrhizobiaceae_unclassified;Bradyrhizobiaceae_unclassified
HWI-M02808_115_AHB9G_1_1106_1918_14256	1088	18	0	0	231	0	0	0	0	0	0	70	86	12	8	0	57	0	47	14	3	30	3	0	0	26	6	0	0	56	0	67	40	137	0	41	50	9		Bacteria;Verrucomicrobia;OPB35_soil_group;OPB35_soil_group_unclassified;OPB35_soil_group_unclassified;OPB35_soil_group_unclassified;OPB35_soil_group_unclassified
HWI-M02808_177_ANHM9_1_1102_23456_9132	1083	0	31	112	55	76	26	9	98	35	64	48	2	11	15	89	18	38	46	0	0	13	21	58	23	0	0	0	0	0	0	0	0	0	0	0	0	0		Bacteria;WD272;uncultured_bacterium;uncultured_bacterium_unclassified;uncultured_bacterium_unclassified;uncultured_bacterium_unclassified;uncultured_bacterium_unclassified
HWI-M02808_115_AHB9G_1_1101_15828_25755	1083	0	0	21	23	0	41	0	0	12	25	71	0	87	0	77	0	0	184	0	46	0	28	219	52	4	0	0	0	0	70	0	0	0	19	0	0	0		Bacteria;Proteobacteria;Alphaproteobacteria;Rhodospirillales;Acetobacteraceae;Acetobacteraceae_uncultured;Acetobacteraceae_unclassified
HWI-M02808_115_AHB9G_1_1101_16676_5150	1079	309	6	0	0	0	0	240	0	0	0	0	17	8	0	0	0	35	0	0	0	0	0	0	1	0	0	0	114	168	96	0	0	0	1	0	0	0		Bacteria;Verrucomicrobia;Opitutae;Opitutales;Opitutaceae;Opitutus;Opitutus_unclassified
HWI-M02808_115_AHB9G_1_2103_8901_10701	1074	6	0	8	3	101	0	0	1	0	0	0	20	11	17	3	94	9	0	5	0	30	0	26	5	0	20	0	172	333	116	0	0	0	0	0	0	0	Ground	Bacteria;Proteobacteria;Betaproteobacteria;Burkholderiales;Comamonadaceae;Comamonadaceae_unclassified;Comamonadaceae_unclassified
HWI-M02808_115_AHB9G_1_1101_20075_5641	1072	0	0	474	13	81	11	409	3	26	14	0	5	0	0	5	26	0	0	2	0	0	0	2	0	0	0	0	0	0	1	0	0	0	0	0	0	0		Bacteria;Cyanobacteria;Chloroplast;uncultured_Streptophyta;uncultured_Streptophyta_unclassified;uncultured_Streptophyta_unclassified;uncultured_Streptophyta_unclassified
HWI-M02808_115_AHB9G_1_1101_6550_6968	1069	0	0	0	0	0	0	0	0	0	0	0	0	0	0	0	0	0	0	0	0	0	0	0	0	179	34	3	1	0	0	105	62	132	0	60	25	461	Ground	Bacteria;Acidobacteria;Acidobacteria;Subgroup_2;Subgroup_2_unclassified;Subgroup_2_unclassified;Subgroup_2_unclassified
HWI-M02808_115_AHB9G_1_1104_6325_12187	1067	8	6	200	241	163	58	20	13	19	14	58	0	40	0	109	0	50	0	0	0	0	0	9	22	1	0	0	0	0	0	0	0	0	3	0	0	0		Bacteria;Verrucomicrobia;Opitutae;Opitutales;Opitutaceae;Opitutus;uncultured_bacterium
HWI-M02808_115_AHB9G_1_1101_9775_14644	1055	48	20	52	104	122	71	91	0	69	6	67	32	6	0	81	0	4	0	0	0	0	1	0	10	55	9	0	18	11	81	0	0	0	17	0	0	0		Bacteria;Acidobacteria;Acidobacteria;Acidobacteriales;Acidobacteriaceae_(Subgroup_1);Candidatus_Koribacter;uncultured_bacterium
HWI-M02808_177_ANHM9_1_1107_22957_16547	1053	0	6	617	5	0	104	1	0	170	16	8	6	11	0	86	0	0	0	3	0	0	0	0	0	0	0	0	0	0	0	0	0	0	2	0	0	0		Bacteria;Acidobacteria;Acidobacteria;Acidobacteriales;Acidobacteriaceae_(Subgroup_1);Acidobacteriaceae_(Subgroup_1)_uncultured;Acidobacteriaceae_(Subgroup_1)_unclassified
HWI-M02808_115_AHB9G_1_1103_6965_12592	1045	0	0	188	100	118	0	0	15	45	0	0	0	30	0	0	0	33	0	0	0	0	0	0	18	54	5	0	0	0	0	30	0	59	179	52	0	60		Bacteria;Proteobacteria;Alphaproteobacteria;Rhizobiales;Rhizobiales_Incertae_Sedis;Rhizomicrobium;Rhizomicrobium_unclassified
HWI-M02808_115_AHB9G_1_1101_19664_23957	1040	0	0	0	26	0	11	86	0	0	0	0	81	21	20	5	14	12	67	24	0	6	6	30	4	6	30	73	124	0	102	68	0	0	0	33	79	6	Ground	Bacteria;Bacteria_unclassified;Bacteria_unclassified;Bacteria_unclassified;Bacteria_unclassified;Bacteria_unclassified;Bacteria_unclassified
HWI-M02808_115_AHB9G_1_1105_10674_21721	1039	0	0	0	12	0	15	0	0	8	0	0	120	0	1	6	121	15	95	9	38	253	40	187	7	0	0	0	0	7	8	0	0	2	0	0	0	0	CASE_Unique	Bacteria;Cyanobacteria;Chloroplast;uncultured_eubacterium_WD215;uncultured_eubacterium_WD215_unclassified;uncultured_eubacterium_WD215_unclassified;uncultured_eubacterium_WD215_unclassified
HWI-M02808_115_AHB9G_1_1106_21789_12477	1037	0	1	25	0	0	0	0	0	0	4	0	0	21	0	719	0	0	0	218	0	0	0	0	0	7	0	0	0	0	0	0	0	0	8	0	0	0	CAAT_Inhibited	Bacteria;Chloroflexi;Ktedonobacteria;Ktedonobacterales;1959-1;uncultured_bacterium;uncultured_bacterium_unclassified
HWI-M02808_177_ANHM9_1_1102_16064_13598	1034	0	103	154	0	6	47	0	234	75	8	18	0	74	0	104	0	0	0	0	0	0	0	0	31	0	0	0	5	0	0	0	0	0	0	0	0	0		Bacteria;Acidobacteria;Acidobacteria;Subgroup_2;uncultured_forest_soil_bacterium;uncultured_forest_soil_bacterium_unclassified;uncultured_forest_soil_bacterium_unclassified
HWI-M02808_115_AHB9G_1_1108_16082_22548	1034	1	0	8	22	41	6	17	0	0	5	13	24	9	3	47	8	22	34	7	0	0	0	50	7	10	4	20	27	13	54	9	3	9	289	41	1	202	Ground	Bacteria;Actinobacteria;Actinobacteria;Streptomycetales;Streptomycetaceae;Streptomycetaceae_unclassified;Streptomycetaceae_unclassified
HWI-M02808_177_ANHM9_1_1103_28190_12248	1033	0	0	0	0	0	0	0	0	0	0	0	0	0	0	0	1	0	0	0	0	0	0	0	0	8	5	13	0	1	1	13	18	21	0	465	343	142	Ground	Bacteria;Actinobacteria;Actinobacteria;Streptomycetales;Streptomycetaceae;Kitasatospora;Kitasatospora_unclassified
HWI-M02808_115_AHB9G_1_1105_12496_9049	1033	21	10	102	29	35	47	11	17	74	3	118	3	0	0	83	0	0	1	0	0	0	0	5	0	54	6	0	9	0	2	19	17	26	147	24	26	74		Bacteria;Planctomycetes;Planctomycetacia;Planctomycetales;Planctomycetaceae;Planctomycetaceae_uncultured;uncultured_Zavarzinella_sp.
HWI-M02808_177_ANHM9_1_1101_23382_12773	1030	0	5	43	28	48	68	57	5	49	44	53	21	45	5	91	5	4	24	9	0	2	5	20	19	19	7	0	25	17	152	3	7	0	32	4	4	13		Bacteria;Actinobacteria;Actinobacteria;Frankiales;Sporichthyaceae;Sporichthya;Sporichthya_polymorpha
HWI-M02808_115_AHB9G_1_1104_26016_11645	1030	9	4	27	27	37	26	20	7	159	28	66	45	22	4	55	25	3	97	19	0	0	13	102	27	8	0	17	41	17	9	9	0	0	34	0	0	0		Bacteria;Cyanobacteria;Chloroplast;uncultured_Chlorophyta;uncultured_Chlorophyta_unclassified;uncultured_Chlorophyta_unclassified;uncultured_Chlorophyta_unclassified
HWI-M02808_115_AHB9G_1_1101_12560_3114	1019	118	21	0	9	81	81	0	0	0	0	74	0	12	0	180	0	0	0	0	0	0	0	0	42	0	5	45	37	0	34	45	0	0	144	0	0	6		Bacteria;Bacteroidetes;Sphingobacteriia;Sphingobacteriales;Sphingobacteriaceae;Mucilaginibacter;uncultured_Mucilaginibacter_sp.
HWI-M02808_115_AHB9G_1_1106_2855_12687	1014	0	12	29	34	117	163	96	14	31	0	36	8	1	0	25	3	0	0	0	0	0	0	0	2	17	4	11	21	11	6	58	15	67	97	3	1	66		Bacteria;Proteobacteria;Deltaproteobacteria;Myxococcales;Haliangiaceae;Haliangium;Haliangium_unclassified
HWI-M02808_115_AHB9G_1_1101_17223_22655	1013	0	0	0	0	0	0	0	0	0	0	0	0	0	0	0	0	0	0	0	0	0	0	0	0	113	49	12	0	0	0	86	100	101	0	223	266	38	Ground	Bacteria;Acidobacteria;Acidobacteria;Subgroup_6;Subgroup_6_unclassified;Subgroup_6_unclassified;Subgroup_6_unclassified
HWI-M02808_115_AHB9G_1_1112_13938_5050	1013	11	38	75	54	35	57	41	0	63	31	59	43	21	0	109	67	9	25	23	0	0	3	36	12	6	2	0	2	7	31	12	0	3	88	0	0	0		Bacteria;Acidobacteria;Acidobacteria;Acidobacteriales;Acidobacteriaceae_(Subgroup_1);Granulicella;uncultured_Acidobacteria_bacterium
HWI-M02808_177_ANHM9_1_1107_9926_23631	1010	0	2	2	6	38	4	8	0	1	0	1	0	12	0	0	97	0	0	0	0	0	0	203	0	12	4	13	0	15	30	3	11	40	0	181	227	3		Bacteria;Proteobacteria;Betaproteobacteria;Burkholderiales;Oxalobacteraceae;Duganella;uncultured_bacterium
HWI-M02808_177_ANHM9_1_1107_14389_25451	1008	0	0	0	0	0	0	0	0	0	0	0	0	0	0	0	0	0	0	0	47	951	0	0	0	0	0	0	0	0	0	0	0	0	0	0	0	0	CASE_Unique	Bacteria;Cyanobacteria;Cyanobacteria;SubsectionIV;FamilyI;Nostoc;Nostoc_unclassified
HWI-M02808_115_AHB9G_1_1101_7831_24545	1007	54	0	0	0	0	0	0	4	0	0	0	195	47	15	0	0	0	0	0	9	62	15	0	0	72	11	0	0	329	0	39	11	19	75	2	13	3	CAAT_Inhibited	Bacteria;Verrucomicrobia;OPB35_soil_group;OPB35_soil_group_unclassified;OPB35_soil_group_unclassified;OPB35_soil_group_unclassified;OPB35_soil_group_unclassified
HWI-M02808_115_AHB9G_1_1101_23941_14584	1002	43	6	0	58	51	40	52	5	95	9	27	40	25	5	119	23	19	56	7	0	0	1	17	24	20	0	19	11	26	68	25	0	9	52	2	0	0		Bacteria;Verrucomicrobia;Spartobacteria;Chthoniobacterales;Xiphinematobacteraceae;Candidatus_Xiphinematobacter;Candidatus_Xiphinematobacter_unclassified
HWI-M02808_115_AHB9G_1_1107_3910_8160	998	0	4	76	142	73	140	12	0	119	25	0	54	12	7	75	54	17	19	2	0	0	3	35	7	0	0	0	9	36	0	0	10	0	33	0	0	0		Bacteria;Bacteroidetes;Sphingobacteriia;Sphingobacteriales;Chitinophagaceae;Chitinophagaceae_unclassified;Chitinophagaceae_unclassified
HWI-M02808_177_ANHM9_1_2104_13601_16865	996	0	1	169	0	0	0	0	0	771	0	0	0	0	0	0	0	0	0	0	0	0	0	0	0	0	0	0	0	0	0	0	0	0	0	0	0	0		Bacteria;Acidobacteria;Acidobacteria;Acidobacteriales;Acidobacteriaceae_(Subgroup_1);Acidobacteriaceae_(Subgroup_1)_uncultured;Acidobacteriaceae_(Subgroup_1)_unclassified
HWI-M02808_177_ANHM9_1_1106_9646_14914	994	0	0	0	139	13	0	26	0	0	52	0	0	41	0	31	0	0	121	4	0	0	0	0	28	0	0	4	0	4	383	0	4	6	0	0	0	4		Bacteria;Actinobacteria;Thermoleophilia;Solirubrobacterales;Solirubrobacterales_unclassified;Solirubrobacterales_unclassified;Solirubrobacterales_unclassified
HWI-M02808_177_ANHM9_1_2103_28162_11540	990	0	0	0	5	0	0	0	0	0	0	2	39	0	37	21	16	0	42	0	6	16	0	19	0	0	14	0	325	0	218	0	0	74	0	0	86	48	CAAT_Inhibited	Bacteria;Bacteroidetes;Cytophagia;Cytophagales;Cytophagaceae;Cytophagaceae_uncultured;Cytophagaceae_unclassified
HWI-M02808_115_AHB9G_1_1102_10222_16914	987	38	1	0	34	37	2	122	0	0	0	40	68	2	12	6	48	16	158	35	2	13	13	62	1	0	0	0	61	0	172	0	6	1	0	0	3	0		Bacteria;Bacteroidetes;Cytophagia;Cytophagales;Cytophagaceae;Cytophagaceae_unclassified;Cytophagaceae_unclassified
HWI-M02808_115_AHB9G_1_1108_11669_23761	983	5	12	33	0	0	7	0	36	836	0	0	0	5	0	15	0	0	0	0	0	0	0	0	1	0	0	0	0	0	12	0	0	0	16	0	0	0		Bacteria;Bacteroidetes;Sphingobacteriia;Sphingobacteriales;Sphingobacteriaceae;Mucilaginibacter;Mucilaginibacter_unclassified
HWI-M02808_115_AHB9G_1_1103_11946_14821	979	32	0	0	0	0	1	8	0	0	0	2	68	13	50	0	37	0	84	14	34	15	38	20	1	0	12	92	97	29	114	19	0	0	0	0	17	2	CAAT_Inhibited	Bacteria;Chloroflexi;Anaerolineae;Anaerolineales;Anaerolineaceae;Anaerolineaceae_uncultured;Anaerolineaceae_unclassified
HWI-M02808_115_AHB9G_1_1101_2735_11955	975	61	0	0	0	25	0	2	0	0	0	14	44	8	32	0	4	8	26	21	0	0	0	1	1	48	51	56	90	26	43	44	55	29	0	117	48	0	Ground	Bacteria;Acidobacteria;Acidobacteria;Subgroup_6;Subgroup_6_unclassified;Subgroup_6_unclassified;Subgroup_6_unclassified
HWI-M02808_115_AHB9G_1_1101_8828_9003	971	8	2	0	10	29	1	20	0	0	0	17	46	7	17	1	40	3	329	25	0	0	8	168	1	7	2	51	22	22	23	5	18	5	0	0	9	4	CAAT_Inhibited	Bacteria;Proteobacteria;Deltaproteobacteria;Myxococcales;Cystobacteraceae;Anaeromyxobacter;uncultured_bacterium
HWI-M02808_115_AHB9G_1_1103_6389_25725	970	27	1	0	29	8	0	14	0	0	0	13	1	0	1	0	8	4	0	0	0	0	1	0	0	71	20	42	71	39	5	106	56	63	16	170	100	79	Ground	Bacteria;Acidobacteria;Acidobacteria;Subgroup_3;Unknown_Family;Candidatus_Solibacter;bacterium_Ellin6071
HWI-M02808_115_AHB9G_1_1103_20536_7994	968	20	8	0	16	35	0	67	0	0	1	18	60	29	18	0	77	25	48	30	16	31	14	87	14	18	12	26	42	14	46	3	17	13	5	21	0	6		Bacteria;Actinobacteria;Actinobacteria;Kineosporiales;Kineosporiaceae;Kineosporiaceae_unclassified;Kineosporiaceae_unclassified
HWI-M02808_115_AHB9G_1_1101_3376_9293	961	0	0	0	0	0	0	0	0	0	0	0	0	0	0	0	0	0	0	0	0	0	0	0	0	159	52	72	0	29	0	175	100	100	0	106	72	52	Ground	Bacteria;Proteobacteria;Betaproteobacteria;Betaproteobacteria_unclassified;Betaproteobacteria_unclassified;Betaproteobacteria_unclassified;Betaproteobacteria_unclassified
HWI-M02808_115_AHB9G_1_1102_22355_5510	960	93	0	6	7	1	0	10	0	0	0	16	21	1	4	0	27	1	117	7	0	1	7	45	0	26	16	72	111	82	74	39	27	22	3	54	42	10	Ground	Bacteria;Planctomycetes;Planctomycetacia;Planctomycetales;Planctomycetaceae;Planctomycetaceae_unclassified;Planctomycetaceae_unclassified
HWI-M02808_115_AHB9G_1_1103_19282_20771	959	26	0	0	2	9	0	8	0	0	0	21	57	0	13	6	13	0	245	6	0	93	5	68	0	0	0	59	107	60	89	0	27	0	0	31	0	0	CAAT_Inhibited	Bacteria;Chloroflexi;Anaerolineae;Anaerolineales;Anaerolineaceae;Anaerolineaceae_uncultured;wastewater_metagenome
HWI-M02808_115_AHB9G_1_1104_24528_4866	952	14	0	0	21	49	0	12	0	0	0	42	99	1	4	9	45	0	122	17	0	4	1	24	0	274	1	4	0	1	25	96	12	0	0	7	13	21		Bacteria;Proteobacteria;Deltaproteobacteria;Myxococcales;Haliangiaceae;Haliangium;Haliangium_unclassified
HWI-M02808_115_AHB9G_1_1106_6484_15177	946	0	0	0	11	4	0	0	0	0	0	0	0	0	0	0	0	0	0	0	30	276	54	451	0	0	0	0	0	0	0	0	0	0	0	0	0	0	CASE_Unique	Bacteria;Cyanobacteria;Chloroplast;Chloroplast_unclassified;Chloroplast_unclassified;Chloroplast_unclassified;Chloroplast_unclassified
HWI-M02808_115_AHB9G_1_1101_18224_5411	945	0	0	0	0	0	0	0	0	0	0	0	0	0	0	0	0	0	0	0	0	0	0	0	0	0	151	0	3	5	0	0	260	0	0	0	344	178	Ground	Bacteria;Acidobacteria;Acidobacteria;Subgroup_6;uncultured_Anaeromyxobacter_sp.;uncultured_Anaeromyxobacter_sp._unclassified;uncultured_Anaeromyxobacter_sp._unclassified
HWI-M02808_115_AHB9G_1_1101_19073_23803	944	58	13	2	7	46	4	25	0	9	14	26	28	13	9	17	19	6	23	14	21	30	14	50	19	27	12	24	17	10	28	43	19	23	39	75	22	13		Bacteria;Actinobacteria;Actinobacteria;Propionibacteriales;Nocardioidaceae;Nocardioides;Nocardioides_unclassified
HWI-M02808_115_AHB9G_1_1102_16161_22365	943	37	0	0	5	30	0	23	0	0	0	0	31	20	56	12	35	12	100	75	54	71	42	65	6	0	0	0	0	37	39	0	0	0	0	0	0	0	CASE_Unique	Bacteria;Acidobacteria;Acidobacteria;Subgroup_6;Subgroup_6_unclassified;Subgroup_6_unclassified;Subgroup_6_unclassified
HWI-M02808_115_AHB9G_1_1101_5325_7859	943	0	0	0	0	4	0	5	0	0	0	0	3	0	7	12	82	5	18	9	27	291	36	323	0	0	0	0	0	0	0	0	0	0	0	0	0	0	CASE_Unique	Bacteria;Cyanobacteria;Chloroplast;Chloroplast_unclassified;Chloroplast_unclassified;Chloroplast_unclassified;Chloroplast_unclassified
HWI-M02808_115_AHB9G_1_1101_19180_2177	942	115	58	90	0	0	0	0	225	208	19	0	0	0	0	24	0	0	0	0	0	0	0	0	0	0	0	0	0	0	0	0	0	2	0	0	0	0		Bacteria;Acidobacteria;Acidobacteria;Acidobacteriales;Acidobacteriaceae_(Subgroup_1);Acidobacteriaceae_(Subgroup_1)_uncultured;uncultured_Acidobacteriaceae_bacterium
HWI-M02808_115_AHB9G_1_1103_11989_11783	942	47	33	106	0	0	0	64	120	76	23	26	0	23	0	66	0	19	0	0	0	0	0	0	29	38	4	0	0	0	0	11	0	2	48	6	0	10		Bacteria;Proteobacteria;Alphaproteobacteria;Rhizobiales;alphaI_cluster;alphaI_cluster_unclassified;alphaI_cluster_unclassified
HWI-M02808_115_AHB9G_1_1102_21376_11391	936	48	1	0	0	17	0	7	0	7	0	10	6	1	0	0	1	6	0	0	0	0	0	0	0	92	13	22	49	12	8	53	53	92	14	201	38	159	Ground	Bacteria;Acidobacteria;Acidobacteria;Subgroup_3;Unknown_Family;Bryobacter;uncultured_Acidobacteria_bacterium
HWI-M02808_115_AHB9G_1_1101_9651_23262	935	83	1	0	0	1	0	56	0	0	0	10	106	26	15	7	36	4	152	10	12	27	27	6	12	48	0	35	40	33	133	0	2	0	3	3	1	0		Bacteria;Actinobacteria;Actinobacteria;Micromonosporales;Micromonosporaceae;Micromonosporaceae_unclassified;Micromonosporaceae_unclassified
HWI-M02808_177_ANHM9_1_2103_23836_20797	934	0	0	0	0	0	0	0	0	0	0	0	0	1	0	2	871	0	2	0	0	0	0	0	0	0	0	14	0	11	6	2	3	0	0	19	0	0	CAAT_Inhibited	Bacteria;Proteobacteria;Alphaproteobacteria;Sphingomonadales;Sphingomonadaceae;Sphingomonas;Sphingomonas_sp._PR090111-T3T-6A
HWI-M02808_115_AHB9G_1_1103_11667_22935	934	42	59	121	5	0	110	0	92	161	15	91	0	7	0	49	0	5	0	0	0	0	0	0	15	0	0	0	6	0	0	1	0	0	3	0	0	13		Bacteria;Verrucomicrobia;Opitutae;Opitutales;Opitutaceae;Opitutus;Opitutus_unclassified
HWI-M02808_115_AHB9G_1_1101_18364_16409	931	36	0	0	0	16	0	48	0	0	0	45	24	5	4	0	10	15	18	4	0	3	5	6	0	108	14	0	71	0	83	5	89	0	0	162	95	0		Bacteria;Proteobacteria;Alphaproteobacteria;Rhizobiales;Hyphomicrobiaceae;Hyphomicrobium;Hyphomicrobium_unclassified
HWI-M02808_115_AHB9G_1_1101_24024_9661	931	4	0	0	0	0	0	5	0	0	0	0	77	42	24	4	41	1	182	11	6	73	24	187	6	0	0	60	40	48	68	0	0	0	0	0	0	0	CASE_Unique	Bacteria;Bacteroidetes;Sphingobacteriia;Sphingobacteriales;Chitinophagaceae;Chitinophagaceae_uncultured;uncultured_Sphingobacteriales_bacterium
HWI-M02808_115_AHB9G_1_1102_9673_9417	920	0	0	498	0	0	0	0	0	0	0	0	0	0	0	0	0	0	0	0	0	0	0	0	0	0	0	0	0	0	309	0	0	0	22	0	0	0		Bacteria;Bacteroidetes;Sphingobacteriia;Sphingobacteriales;Chitinophagaceae;Flavisolibacter;uncultured_bacterium
HWI-M02808_115_AHB9G_1_1103_7551_19300	915	58	0	0	0	20	2	27	0	0	0	0	5	0	8	78	6	0	62	0	0	12	4	0	0	39	8	20	33	114	159	64	30	26	0	33	65	8	Ground	Bacteria;Planctomycetes;Planctomycetacia;Planctomycetales;Planctomycetaceae;Planctomycetaceae_uncultured;uncultured_Zavarzinella_sp.
HWI-M02808_115_AHB9G_1_1102_11824_13109	915	0	0	0	0	0	0	0	0	0	0	0	0	0	0	0	0	0	0	0	0	0	0	0	0	0	0	0	0	0	0	0	0	0	915	0	0	0	GRFL_Unique	Bacteria;Proteobacteria;Gammaproteobacteria;Xanthomonadales;Xanthomonadales_uncultured;uncultured_eubacterium_WD260;uncultured_eubacterium_WD260_unclassified
HWI-M02808_115_AHB9G_1_2103_24765_22789	909	0	0	0	0	0	478	0	27	221	10	0	0	10	0	79	0	0	2	0	0	0	0	0	4	0	0	0	0	0	0	0	0	0	6	0	0	0		Bacteria;Bacteroidetes;Sphingobacteriia;Sphingobacteriales;Chitinophagaceae;Sediminibacterium;Sediminibacterium_unclassified
HWI-M02808_115_AHB9G_1_1101_9075_12952	909	49	46	105	20	34	140	20	53	57	5	27	25	12	0	55	0	3	5	6	0	0	0	1	13	2	0	0	0	0	7	0	0	0	77	0	0	39		Bacteria;Proteobacteria;Deltaproteobacteria;Myxococcales;Haliangiaceae;Haliangium;uncultured_Myxococcales_bacterium
HWI-M02808_115_AHB9G_1_2102_15358_17179	899	0	0	0	0	0	0	0	0	0	0	4	0	7	0	0	0	0	0	0	0	0	0	0	0	1	7	13	0	1	0	49	10	23	0	496	208	79	Ground	Bacteria;Actinobacteria;Actinobacteria;Micrococcales;Micrococcaceae;Arthrobacter;Arthrobacter_oxydans
HWI-M02808_115_AHB9G_1_2103_7911_23090	897	8	0	0	2	0	0	12	0	0	0	0	10	13	60	0	42	4	127	3	59	49	58	27	0	2	10	38	153	6	21	0	11	12	0	0	9	0	CAAT_Inhibited	Bacteria;Acidobacteria;Acidobacteria;Subgroup_4;DS-100;DS-100_unclassified;DS-100_unclassified
HWI-M02808_115_AHB9G_1_1102_20447_16302	894	17	0	0	0	0	0	0	0	4	0	11	0	0	0	22	0	0	0	1	0	0	0	0	0	34	6	5	0	0	1	10	0	49	679	36	0	0	Ground	Bacteria;Proteobacteria;Alphaproteobacteria;Rhizobiales;Xanthobacteraceae;Variibacter;uncultured_forest_soil_bacterium
HWI-M02808_115_AHB9G_1_1103_10143_20716	894	0	0	119	178	37	46	15	0	81	8	57	61	16	0	30	49	6	37	0	0	68	0	38	14	0	0	0	0	0	13	0	0	0	0	0	0	0		Bacteria;Acidobacteria;Acidobacteria;Subgroup_3;Unknown_Family;Bryobacter;uncultured_Acidobacteria_bacterium
HWI-M02808_115_AHB9G_1_1101_20041_11130	892	135	0	0	0	13	0	16	0	0	0	5	0	0	0	0	0	4	0	0	0	0	0	0	0	184	5	26	9	24	8	146	47	51	0	98	85	27	Ground	Bacteria;Planctomycetes;Planctomycetacia;Planctomycetales;Planctomycetaceae;Pir4_lineage;uncultured_bacterium
HWI-M02808_115_AHB9G_1_1101_11485_18719	892	0	0	131	110	135	62	0	30	96	34	100	0	0	0	93	0	0	0	0	0	0	0	0	56	0	0	0	0	0	0	2	0	0	0	0	0	0		Bacteria;WD272;uncultured_bacterium;uncultured_bacterium_unclassified;uncultured_bacterium_unclassified;uncultured_bacterium_unclassified;uncultured_bacterium_unclassified
HWI-M02808_115_AHB9G_1_1105_11558_13254	891	18	1	99	111	198	0	48	0	0	0	106	0	0	0	0	0	44	0	9	0	0	0	0	0	27	2	15	8	32	34	18	6	13	0	0	3	64		Bacteria;Bacteroidetes;Sphingobacteriia;Sphingobacteriales;Chitinophagaceae;Sediminibacterium;Sediminibacterium_unclassified
HWI-M02808_115_AHB9G_1_1101_24385_12324	889	117	0	0	0	13	0	0	0	0	0	0	0	0	0	0	59	0	0	0	1	27	8	0	0	0	0	0	0	0	13	0	319	212	0	0	100	0	Ground	Bacteria;Proteobacteria;Deltaproteobacteria;Myxococcales;Haliangiaceae;Haliangium;Haliangium_unclassified
HWI-M02808_115_AHB9G_1_1101_13874_2735	888	71	0	0	2	24	0	21	0	0	0	30	15	13	3	2	0	7	36	13	4	19	6	22	5	94	16	16	0	17	33	146	83	14	0	52	44	18		Bacteria;Proteobacteria;Alphaproteobacteria;Rhizobiales;Xanthobacteraceae;Variibacter;Variibacter_unclassified
HWI-M02808_115_AHB9G_1_1107_28110_19853	886	7	0	0	1	0	0	0	0	0	0	12	13	0	6	7	6	9	10	0	16	84	7	2	0	0	35	122	87	114	88	0	135	18	0	12	31	0	CAAT_Inhibited	Bacteria;Proteobacteria;Deltaproteobacteria;Myxococcales;BIrii41;uncultured_delta_proteobacterium;uncultured_delta_proteobacterium_unclassified
HWI-M02808_115_AHB9G_1_1104_13672_16535	885	21	35	143	88	28	19	11	0	64	45	0	75	5	0	43	22	3	69	2	0	0	2	101	1	27	0	0	7	11	2	7	0	0	7	0	0	2		Bacteria;Bacteroidetes;Sphingobacteriia;Sphingobacteriales;Sphingobacteriaceae;Mucilaginibacter;Mucilaginibacter_unclassified
HWI-M02808_115_AHB9G_1_1104_23465_10558	884	27	0	0	0	123	0	43	5	0	0	0	92	0	11	0	95	80	0	85	0	146	0	0	0	0	0	47	6	17	0	0	3	0	0	0	0	1		Bacteria;Proteobacteria;Alphaproteobacteria;Rhodospirillales;Acetobacteraceae;Acetobacteraceae_uncultured;uncultured_soil_bacterium
HWI-M02808_115_AHB9G_1_1101_12522_2171	883	812	0	0	0	0	0	0	0	0	0	0	0	0	1	0	0	0	14	0	0	0	0	0	0	11	0	0	0	0	0	0	1	0	0	0	2	0		Bacteria;Bacteroidetes;Sphingobacteriia;Sphingobacteriales;Chitinophagaceae;Terrimonas;Terrimonas_unclassified
HWI-M02808_115_AHB9G_1_1101_21369_7295	883	100	0	0	0	12	0	5	0	0	0	18	44	25	28	6	22	0	36	34	156	130	95	0	14	0	6	15	8	17	16	0	0	2	0	0	0	0	CASE_Unique	Bacteria;Actinobacteria;Thermoleophilia;Solirubrobacterales;Solirubrobacteraceae;Solirubrobacter;uncultured_bacterium
HWI-M02808_115_AHB9G_1_1101_5446_16286	881	129	5	0	0	52	0	18	0	0	0	41	7	16	1	0	0	0	51	9	0	0	0	1	4	41	18	25	6	13	22	35	17	31	19	98	0	50		Bacteria;Actinobacteria;Thermoleophilia;Gaiellales;Gaiellales_uncultured;Gaiellales_unclassified;Gaiellales_unclassified
HWI-M02808_115_AHB9G_1_1102_2345_11550	881	15	0	0	11	63	0	54	0	0	0	57	47	25	17	2	41	11	104	48	0	0	0	11	3	9	20	13	44	33	85	46	6	12	0	17	16	15		Bacteria;Chloroflexi;Anaerolineae;Anaerolineales;Anaerolineaceae;Anaerolineaceae_uncultured;uncultured_Gemmatimonadetes_bacterium
HWI-M02808_115_AHB9G_1_1101_6276_24651	879	53	3	0	11	16	1	28	0	3	0	14	22	7	9	4	21	0	67	12	0	7	2	64	1	107	22	17	32	20	32	114	50	27	0	19	20	39	Ground	Bacteria;Proteobacteria;Alphaproteobacteria;Rhodospirillales;KCM-B-15;uncultured_bacterium;uncultured_bacterium_unclassified
HWI-M02808_115_AHB9G_1_2107_19254_14739	878	0	0	0	0	0	0	0	0	0	0	0	0	0	0	0	0	0	0	0	0	0	0	0	0	0	0	1	0	0	2	14	4	1	0	48	105	703		Bacteria;Actinobacteria;Actinobacteria;Micrococcales;Micrococcaceae;Arthrobacter;Arthrobacter_unclassified
HWI-M02808_115_AHB9G_1_1105_17336_3106	876	1	0	11	6	1	0	6	2	0	2	1	49	2	0	0	47	26	1	0	5	0	8	83	6	29	7	55	6	39	121	8	110	53	0	20	98	28	CAAT_Inhibited	Bacteria;Proteobacteria;Alphaproteobacteria;Rhizobiales;Bradyrhizobiaceae;Tardiphaga;uncultured_bacterium
HWI-M02808_115_AHB9G_1_1101_20448_3984	872	91	0	0	29	19	0	86	0	0	0	4	48	0	18	0	124	13	0	33	0	88	10	76	0	0	0	0	20	59	35	0	2	1	0	0	12	0		Bacteria;Verrucomicrobia;Opitutae;Opitutales;Opitutaceae;Opitutus;uncultured_bacterium
HWI-M02808_115_AHB9G_1_2108_27309_19970	871	0	0	0	0	1	0	11	0	0	0	0	1	0	0	0	0	0	0	0	0	0	0	0	0	83	29	118	127	84	11	136	46	34	0	102	33	15	Ground	Bacteria;Proteobacteria;Alphaproteobacteria;Rhizobiales;Rhizobiales_Incertae_Sedis;Rhizomicrobium;uncultured_alpha_proteobacterium
HWI-M02808_115_AHB9G_1_1101_23027_13421	871	52	6	2	12	75	0	50	0	0	0	51	51	6	4	12	12	4	52	18	0	8	4	24	5	57	6	9	30	34	88	70	36	0	0	0	24	15		Bacteria;Proteobacteria;Alphaproteobacteria;Rhizobiales;KF-JG30-B3;KF-JG30-B3_unclassified;KF-JG30-B3_unclassified
HWI-M02808_115_AHB9G_1_1101_21079_21706	869	24	33	157	0	0	78	5	44	66	0	0	0	0	0	0	0	0	0	0	0	0	0	0	0	81	0	0	0	0	0	11	0	0	222	0	0	0		Bacteria;Acidobacteria;Acidobacteria;Subgroup_2;Subgroup_2_unclassified;Subgroup_2_unclassified;Subgroup_2_unclassified
HWI-M02808_115_AHB9G_1_1102_11685_22410	867	0	0	0	0	0	0	0	0	0	0	0	3	0	3	0	851	0	0	0	0	0	0	0	0	1	0	0	0	2	1	0	2	0	0	0	4	0	CAAT_Inhibited	Bacteria;Acidobacteria;Acidobacteria;Subgroup_4;Subgroup_4_unclassified;Subgroup_4_unclassified;Subgroup_4_unclassified
HWI-M02808_115_AHB9G_1_1108_7947_14724	867	11	4	26	90	37	66	37	0	24	13	36	61	33	0	65	68	4	46	3	1	8	0	64	7	0	0	23	15	34	35	0	0	0	14	0	0	0		Bacteria;Acidobacteria;Acidobacteria;Acidobacteriales;Acidobacteriaceae_(Subgroup_1);Acidobacterium;Acidobacterium_unclassified
HWI-M02808_115_AHB9G_1_2101_8536_7800	866	0	0	2	89	63	16	10	0	7	6	9	128	19	0	130	163	8	99	27	0	0	1	34	13	0	0	0	0	2	2	0	0	0	0	0	0	0		Bacteria;Verrucomicrobia;OPB35_soil_group;OPB35_soil_group_unclassified;OPB35_soil_group_unclassified;OPB35_soil_group_unclassified;OPB35_soil_group_unclassified
HWI-M02808_177_ANHM9_1_1103_19408_12107	866	0	3	77	108	36	34	34	5	34	1	71	34	5	0	70	32	5	21	8	0	0	3	48	18	8	1	5	3	5	83	0	0	0	106	1	0	0		Bacteria;Bacteroidetes;Sphingobacteriia;Sphingobacteriales;Sphingobacteriaceae;Mucilaginibacter;Mucilaginibacter_unclassified
HWI-M02808_115_AHB9G_1_1101_13220_18899	863	54	0	0	0	156	0	0	0	0	28	126	0	0	58	0	0	38	80	0	0	0	15	158	22	0	0	0	12	0	0	0	0	0	20	0	0	0		Bacteria;Actinobacteria;Actinobacteria;Frankiales;Frankiaceae;Jatrophihabitans;uncultured_Frankineae_bacterium
HWI-M02808_115_AHB9G_1_1102_6134_24599	863	3	8	0	54	180	99	20	10	64	10	36	74	16	0	139	9	0	0	18	0	0	0	0	21	0	0	0	0	0	14	0	0	0	23	0	0	0		Bacteria;Bacteroidetes;Sphingobacteriia;Sphingobacteriales;Sphingobacteriaceae;Mucilaginibacter;Mucilaginibacter_unclassified
HWI-M02808_115_AHB9G_1_1101_24428_18987	859	39	41	76	0	12	39	11	30	159	27	8	0	17	0	133	0	0	0	1	0	0	0	0	28	8	0	0	0	0	0	13	0	1	89	0	0	0		Bacteria;Actinobacteria;Actinobacteria;Frankiales;Acidothermaceae;Acidothermus;Acidothermus_unclassified
HWI-M02808_115_AHB9G_1_1105_8583_24045	854	24	15	89	0	0	239	19	0	112	1	15	0	6	0	33	0	0	0	0	0	0	0	0	0	35	0	1	16	0	0	19	0	0	161	4	5	37		Bacteria;Acidobacteria;Acidobacteria;Subgroup_3;Unknown_Family;Candidatus_Solibacter;Candidatus_Solibacter_unclassified
HWI-M02808_115_AHB9G_1_1101_12971_14334	851	11	3	16	201	124	203	54	0	4	0	74	0	0	6	0	0	0	72	0	0	0	0	0	13	2	0	0	0	0	0	0	3	0	0	0	0	0		Bacteria;Acidobacteria;Acidobacteria;Subgroup_3;Unknown_Family;Bryobacter;uncultured_Acidobacteria_bacterium
HWI-M02808_115_AHB9G_1_1101_5526_17075	845	53	57	2	0	0	2	21	7	0	166	0	19	0	0	79	12	0	3	15	4	11	1	34	1	5	0	39	16	38	25	0	0	0	1	0	0	0		Bacteria;Verrucomicrobia;Spartobacteria;Chthoniobacterales;DA101_soil_group;uncultured_Verrucomicrobia_bacterium;uncultured_Verrucomicrobia_bacterium_unclassified
HWI-M02808_115_AHB9G_1_1106_20940_10544	844	31	0	0	0	0	0	0	0	0	0	0	54	0	15	0	28	0	27	0	105	334	107	12	0	0	0	16	0	17	8	0	0	0	0	0	0	0	CASE_Unique	Bacteria;Bacteroidetes;Cytophagia;Cytophagales;Cytophagaceae;Cytophagaceae_uncultured;Cytophagaceae_unclassified
HWI-M02808_115_AHB9G_1_1106_21677_16267	843	0	0	0	4	0	0	0	0	0	0	0	0	10	5	3	287	14	73	18	12	169	27	160	0	0	0	12	0	0	0	0	8	0	0	0	0	0	CASE_Unique	Bacteria;Cyanobacteria;Cyanobacteria;SubsectionIV;FamilyI;Nostoc;Nostoc_unclassified
HWI-M02808_115_AHB9G_1_1102_8757_8120	839	9	7	0	2	454	46	1	0	0	1	117	28	0	0	0	0	0	0	0	0	0	0	0	0	6	0	0	0	1	0	1	0	0	8	0	0	3		Bacteria;Actinobacteria;Thermoleophilia;Solirubrobacterales;Solirubrobacterales_unclassified;Solirubrobacterales_unclassified;Solirubrobacterales_unclassified
HWI-M02808_115_AHB9G_1_1111_12882_7249	838	6	17	31	17	33	52	15	7	8	17	37	20	7	0	35	23	3	16	15	0	0	0	22	36	48	0	10	8	3	29	23	1	3	107	0	0	20		Bacteria;Proteobacteria;Alphaproteobacteria;Caulobacterales;Caulobacteraceae;Caulobacteraceae_uncultured;Caulobacteraceae_unclassified
HWI-M02808_115_AHB9G_1_1101_8367_4061	834	164	9	0	0	0	0	0	0	0	0	0	0	9	26	51	0	0	0	0	17	127	28	0	0	0	0	130	76	0	0	0	38	0	47	0	0	0		Bacteria;Proteobacteria;Alphaproteobacteria;Rhizobiales;Rhizobiales_Incertae_Sedis;Rhizomicrobium;uncultured_alpha_proteobacterium
HWI-M02808_115_AHB9G_1_2101_15503_7119	831	3	0	0	7	8	0	0	0	0	0	0	74	29	15	0	90	25	219	45	0	44	6	91	0	18	8	21	16	21	34	0	0	0	0	8	0	0	CASE_Unique	Bacteria;Proteobacteria;Gammaproteobacteria;Xanthomonadales;Xanthomonadaceae;Rhodanobacter;uncultured_Xanthomonadaceae_bacterium
HWI-M02808_115_AHB9G_1_1101_27087_10674	831	20	0	0	0	0	0	1	0	0	0	5	0	0	0	0	0	1	1	0	0	0	0	0	0	174	32	12	0	0	2	42	179	67	0	118	166	11	Ground	Bacteria;Proteobacteria;Alphaproteobacteria;Rhizobiales;Rhizobiales_unclassified;Rhizobiales_unclassified;Rhizobiales_unclassified
HWI-M02808_115_AHB9G_1_1101_22126_14714	830	161	147	0	0	0	0	160	38	0	0	0	0	0	0	41	0	0	0	5	0	0	0	0	0	52	0	9	0	0	0	81	2	0	41	0	2	2		Bacteria;Verrucomicrobia;OPB35_soil_group;bacterium_enrichment_culture_clone_auto67_4W;bacterium_enrichment_culture_clone_auto67_4W_unclassified;bacterium_enrichment_culture_clone_auto67_4W_unclassified;bacterium_enrichment_culture_clone_auto67_4W_unclassified
HWI-M02808_115_AHB9G_1_1108_16120_14297	829	0	0	110	146	138	74	14	0	10	5	104	20	4	0	28	28	0	34	2	1	9	0	8	4	5	0	7	0	1	10	3	0	0	3	0	0	0		Bacteria;Acidobacteria;Acidobacteria;Subgroup_3;Unknown_Family;Bryobacter;Bryobacter_unclassified
HWI-M02808_115_AHB9G_1_1101_22176_6345	824	543	0	0	0	3	0	0	0	0	0	88	5	0	0	0	15	0	23	4	0	0	0	0	0	11	7	14	70	10	13	0	13	2	0	0	0	0		Bacteria;Actinobacteria;Actinobacteria;Pseudonocardiales;Pseudonocardiaceae;Amycolatopsis;Amycolatopsis_unclassified
HWI-M02808_115_AHB9G_1_1101_11584_19630	820	0	10	0	107	195	0	0	0	0	33	124	0	0	0	0	0	0	0	0	0	0	0	0	12	0	0	54	0	89	128	19	1	9	0	4	5	0		Bacteria;Acidobacteria;Acidobacteria;Subgroup_3;Unknown_Family;Candidatus_Solibacter;uncultured_Acidobacteria_bacterium
HWI-M02808_115_AHB9G_1_1101_4469_8727	816	24	40	19	3	38	118	25	70	14	0	8	6	6	0	73	0	0	1	4	0	0	0	0	6	26	6	10	10	4	9	18	1	0	83	14	0	43		Bacteria;Acidobacteria;Acidobacteria;Acidobacteriales;Acidobacteriaceae_(Subgroup_1);Acidobacteriaceae_(Subgroup_1)_uncultured;Acidobacteriaceae_(Subgroup_1)_unclassified
HWI-M02808_115_AHB9G_1_1104_10427_21162	814	9	53	148	117	5	61	85	19	59	10	23	17	7	10	21	3	9	3	1	0	0	0	12	6	11	1	0	0	0	24	13	0	0	16	0	0	0		Bacteria;Planctomycetes;Phycisphaerae;WD2101_soil_group;uncultured_bacterium;uncultured_bacterium_unclassified;uncultured_bacterium_unclassified
HWI-M02808_115_AHB9G_1_1101_25447_13062	810	7	0	0	3	42	0	82	0	0	0	35	20	0	14	1	46	3	8	4	0	0	0	21	0	11	12	40	81	73	70	82	18	37	0	24	28	31		Bacteria;Chloroflexi;Anaerolineae;Anaerolineales;Anaerolineaceae;Anaerolineaceae_uncultured;Anaerolineaceae_unclassified
HWI-M02808_115_AHB9G_1_1106_22152_5019	810	0	5	0	0	23	0	0	8	0	0	0	58	0	3	0	10	0	34	0	0	0	0	14	0	150	13	11	0	0	0	87	46	49	0	32	0	245	Ground	Bacteria;Proteobacteria;Gammaproteobacteria;Xanthomonadales;Xanthomonadales_uncultured;Xanthomonadales_unclassified;Xanthomonadales_unclassified
HWI-M02808_115_AHB9G_1_2111_3966_8810	809	1	0	2	0	0	0	0	0	0	0	0	0	0	0	0	0	0	0	0	0	2	0	0	0	0	0	45	22	11	15	8	259	18	2	7	178	229	Ground	Bacteria;Proteobacteria;Gammaproteobacteria;Enterobacteriales;Enterobacteriaceae;Enterobacteriaceae_unclassified;Enterobacteriaceae_unclassified
HWI-M02808_177_ANHM9_1_1102_15975_12553	808	0	1	12	90	23	32	14	0	20	0	54	45	6	5	22	43	7	51	1	14	88	10	154	8	0	1	15	10	14	16	0	0	0	0	9	2	0		Bacteria;Cyanobacteria;Chloroplast;Coccomyxa_solorinae-saccatae;Coccomyxa_solorinae-saccatae_unclassified;Coccomyxa_solorinae-saccatae_unclassified;Coccomyxa_solorinae-saccatae_unclassified
HWI-M02808_115_AHB9G_1_1107_8387_14775	808	18	0	0	1	1	0	20	0	0	0	13	26	1	22	8	17	0	102	6	2	22	8	12	0	0	5	0	119	108	239	18	1	6	0	2	0	0	CAAT_Inhibited	Bacteria;Bacteroidetes;Cytophagia;Cytophagales;Cytophagaceae;Cytophagaceae_uncultured;Cytophagaceae_unclassified
HWI-M02808_115_AHB9G_1_1103_5395_9513	806	24	25	69	0	10	91	0	96	273	31	0	12	0	0	53	0	0	0	0	0	0	0	0	0	13	0	0	5	0	4	0	0	0	0	0	0	0		Bacteria;Acidobacteria;Acidobacteria;Subgroup_2;Subgroup_2_unclassified;Subgroup_2_unclassified;Subgroup_2_unclassified
HWI-M02808_115_AHB9G_1_1102_8510_23336	806	11	15	169	38	32	64	12	0	39	42	49	7	23	0	137	0	1	12	0	0	0	0	0	29	0	0	0	0	0	0	0	0	0	10	0	0	0		Bacteria;Actinobacteria;Actinobacteria;Frankiales;Acidothermaceae;Acidothermus;Acidothermus_unclassified
HWI-M02808_177_ANHM9_1_1107_16869_7906	805	0	44	86	81	95	116	14	7	79	22	52	6	0	0	38	2	1	2	1	0	1	0	1	10	3	0	0	3	0	14	3	0	0	48	0	0	0		Bacteria;Acidobacteria;Acidobacteria;Acidobacteriales;Acidobacteriaceae_(Subgroup_1);Acidobacterium;uncultured_Acidobacteria_bacterium
HWI-M02808_115_AHB9G_1_1106_14112_16519	801	14	0	0	9	17	0	3	0	0	0	4	48	0	23	3	21	1	25	4	6	0	6	17	0	2	0	60	146	121	23	11	40	34	0	47	95	7	Ground	Bacteria;Proteobacteria;Betaproteobacteria;Nitrosomonadales;Nitrosomonadaceae;Nitrosomonadaceae_uncultured;alpha_proteobacterium_BAC29
HWI-M02808_177_ANHM9_1_1105_14020_22488	800	0	0	454	0	0	254	0	1	10	0	0	0	0	0	26	2	6	0	0	0	0	0	0	0	0	0	0	0	0	3	0	0	0	32	0	0	0		Bacteria;Verrucomicrobia;OPB35_soil_group;OPB35_soil_group_unclassified;OPB35_soil_group_unclassified;OPB35_soil_group_unclassified;OPB35_soil_group_unclassified
HWI-M02808_115_AHB9G_1_1102_2626_11968	800	30	0	0	8	20	0	1	0	0	0	7	3	0	0	0	7	0	5	0	0	0	0	0	0	0	21	126	36	23	3	40	79	47	0	193	65	70	Ground	Bacteria;Proteobacteria;Betaproteobacteria;Burkholderiales;Comamonadaceae;Comamonadaceae_unclassified;Comamonadaceae_unclassified
HWI-M02808_115_AHB9G_1_1101_7835_13139	799	15	26	110	42	74	59	36	22	41	16	28	1	18	0	31	2	1	0	0	0	0	0	1	5	30	8	8	26	15	11	20	9	10	20	14	0	16		Bacteria;Proteobacteria;Alphaproteobacteria;Rhodospirillales;Acetobacteraceae;Acetobacteraceae_unclassified;Acetobacteraceae_unclassified
HWI-M02808_115_AHB9G_1_1101_18043_20257	799	0	0	0	10	0	34	58	59	0	4	34	0	0	0	22	5	12	11	0	4	0	2	0	0	88	10	31	32	53	74	34	65	0	0	0	16	0		Bacteria;Proteobacteria;Alphaproteobacteria;Rhodospirillales;Rhodospirillales_Incertae_Sedis;Reyranella;Reyranella_unclassified
HWI-M02808_115_AHB9G_1_1101_11787_28477	798	27	1	0	3	17	0	29	0	0	0	9	43	4	19	0	35	0	69	31	0	0	12	0	1	0	5	56	35	66	80	10	33	1	11	26	39	91	Ground	Bacteria;Proteobacteria;Betaproteobacteria;SC-I-84;SC-I-84_unclassified;SC-I-84_unclassified;SC-I-84_unclassified
HWI-M02808_115_AHB9G_1_2101_21981_4032	798	21	6	16	53	26	24	22	0	8	4	29	50	10	9	49	38	14	79	25	3	0	13	62	10	0	0	30	19	37	32	9	0	2	11	0	0	0		Bacteria;Proteobacteria;Betaproteobacteria;SC-I-84;SC-I-84_unclassified;SC-I-84_unclassified;SC-I-84_unclassified
HWI-M02808_115_AHB9G_1_2107_10985_3105	796	9	24	105	0	0	87	0	181	43	3	0	0	0	0	0	0	0	0	0	0	0	0	0	0	17	0	0	1	0	0	0	0	4	113	0	0	11		Bacteria;Proteobacteria;Alphaproteobacteria;Rhizobiales;Rhizobiales_unclassified;Rhizobiales_unclassified;Rhizobiales_unclassified
HWI-M02808_115_AHB9G_1_1106_17181_23442	796	0	0	0	0	0	7	114	0	2	0	0	0	0	0	176	0	0	0	0	0	0	0	0	12	0	0	0	0	0	0	29	2	39	213	0	0	152	Ground	Bacteria;Proteobacteria;Gammaproteobacteria;Xanthomonadales;Xanthomonadaceae;Rhodanobacter;uncultured_Xanthomonadaceae_bacterium
HWI-M02808_115_AHB9G_1_1110_14257_8217	795	8	7	50	0	0	13	65	6	6	13	25	33	4	0	0	12	10	0	14	0	0	1	0	1	24	15	71	58	59	19	64	26	25	24	11	67	20		Bacteria;Proteobacteria;Betaproteobacteria;Betaproteobacteria_unclassified;Betaproteobacteria_unclassified;Betaproteobacteria_unclassified;Betaproteobacteria_unclassified
HWI-M02808_177_ANHM9_1_1103_12989_2825	794	0	0	12	376	21	4	0	0	0	0	53	72	0	4	1	142	3	18	4	0	0	17	51	2	0	0	0	0	2	0	0	0	0	0	0	0	0		Bacteria;Cyanobacteria;Cyanobacteria;SubsectionIV;FamilyI;Nostoc;Nostoc_unclassified
HWI-M02808_177_ANHM9_1_2113_15045_8894	793	0	0	6	114	13	7	7	0	0	0	12	45	0	12	19	75	6	92	4	0	186	41	95	5	0	0	2	1	7	2	0	0	0	0	0	0	0		Bacteria;Acidobacteria;Acidobacteria;Subgroup_3;Unknown_Family;Candidatus_Solibacter;Candidatus_Solibacter_unclassified
HWI-M02808_115_AHB9G_1_1113_5792_17636	792	0	0	2	11	23	1	101	0	8	2	12	52	6	5	10	12	4	56	9	0	17	4	47	2	38	7	37	37	43	51	30	23	27	4	41	18	8		Bacteria;Verrucomicrobia;Spartobacteria;Chthoniobacterales;Chthoniobacteraceae;Chthoniobacter;Chthoniobacter_unclassified
HWI-M02808_115_AHB9G_1_1101_12275_10866	792	54	9	6	53	195	26	198	16	30	26	0	0	0	0	0	0	0	0	0	0	0	1	0	0	0	0	0	0	0	0	0	0	0	0	0	0	0		Bacteria;Bacteria_unclassified;Bacteria_unclassified;Bacteria_unclassified;Bacteria_unclassified;Bacteria_unclassified;Bacteria_unclassified
HWI-M02808_115_AHB9G_1_1109_5203_15743	790	0	0	0	0	0	0	0	0	0	0	0	0	0	0	0	0	635	0	0	0	0	0	0	0	0	0	155	0	0	0	0	0	0	0	0	0	0	CAAT_Inhibited	Bacteria;Proteobacteria;Alphaproteobacteria;Rickettsiales;Mitochondria;Funaria_hygrometrica;Funaria_hygrometrica_unclassified
HWI-M02808_115_AHB9G_1_1102_11765_3810	789	29	0	3	0	0	0	11	0	0	0	0	0	0	0	0	0	0	0	0	0	0	0	0	0	20	0	239	0	229	0	47	150	0	0	33	0	0	Ground	Bacteria;Bacteroidetes;Cytophagia;Cytophagales;Cytophagaceae;Cytophagaceae_uncultured;Cytophagaceae_unclassified
HWI-M02808_115_AHB9G_1_1101_18840_3205	787	2	0	0	0	0	0	5	0	0	0	0	278	0	0	0	0	1	4	0	0	8	4	0	0	9	1	0	0	1	16	0	141	118	1	0	69	0	CAAT_Inhibited	Bacteria;Bacteroidetes;Sphingobacteriia;Sphingobacteriales;Chitinophagaceae;Chitinophaga;Chitinophaga_arvensicola
HWI-M02808_115_AHB9G_1_1104_14692_17326	785	0	40	1	0	0	20	0	0	8	18	93	0	43	0	56	0	22	0	0	0	0	0	0	49	0	0	0	220	0	0	0	0	0	0	0	0	10		Bacteria;Acidobacteria;Acidobacteria;Subgroup_6;Subgroup_6_unclassified;Subgroup_6_unclassified;Subgroup_6_unclassified
HWI-M02808_115_AHB9G_1_1101_16869_2003	784	25	0	0	0	0	0	11	0	0	0	0	73	35	35	5	43	3	97	48	19	143	34	76	0	0	0	23	0	10	14	0	0	0	0	0	0	0	CASE_Unique	Bacteria;Proteobacteria;Betaproteobacteria;SC-I-84;SC-I-84_unclassified;SC-I-84_unclassified;SC-I-84_unclassified
HWI-M02808_115_AHB9G_1_1101_17156_6226	783	341	58	169	0	0	0	0	24	46	14	0	0	0	0	0	0	0	1	0	0	0	0	0	0	11	0	0	3	0	15	0	11	0	0	13	0	0		Bacteria;Proteobacteria;Alphaproteobacteria;Rickettsiales;Mitochondria;Mitochondria_unclassified;Mitochondria_unclassified
HWI-M02808_115_AHB9G_1_1101_14505_2482	780	0	0	0	0	0	0	0	0	0	0	0	0	0	0	0	74	0	0	0	14	103	19	0	0	45	39	0	26	51	0	68	62	95	0	65	68	18	CAAT_Inhibited	Bacteria;Proteobacteria;Alphaproteobacteria;Rhizobiales;Bradyrhizobiaceae;Bradyrhizobiaceae_unclassified;Bradyrhizobiaceae_unclassified
HWI-M02808_115_AHB9G_1_2103_10249_2522	779	0	0	0	0	4	0	1	0	0	0	3	5	0	0	0	0	1	9	1	0	0	3	31	0	54	8	88	103	36	7	52	67	24	0	120	134	13	Ground	Bacteria;Verrucomicrobia;Spartobacteria;Chthoniobacterales;DA101_soil_group;DA101_soil_group_unclassified;DA101_soil_group_unclassified
HWI-M02808_115_AHB9G_1_1101_17070_2310	778	0	0	0	11	249	7	0	0	0	1	184	94	0	0	0	0	0	0	0	0	0	0	0	0	0	10	0	0	0	0	0	32	142	0	8	30	0		Bacteria;Acidobacteria;Acidobacteria;Acidobacteriales;Acidobacteriaceae_(Subgroup_1);Acidobacteriaceae_(Subgroup_1)_uncultured;uncultured_Acidobacteriaceae_bacterium
HWI-M02808_115_AHB9G_1_1104_11937_28272	774	7	30	16	0	0	0	29	226	122	11	0	0	0	0	13	0	0	0	0	0	0	0	0	1	144	0	6	0	1	73	0	0	0	22	0	0	29		Bacteria;Acidobacteria;Acidobacteria;Acidobacteriales;Acidobacteriaceae_(Subgroup_1);Acidobacteriaceae_(Subgroup_1)_uncultured;Acidobacteriaceae_(Subgroup_1)_unclassified
HWI-M02808_115_AHB9G_1_2113_8282_3922	773	0	0	0	0	0	0	0	0	0	0	0	0	0	0	0	0	0	0	0	0	0	0	0	0	0	0	0	0	0	0	0	0	0	769	0	0	4	GRFL_Unique	Bacteria;Acidobacteria;Acidobacteria;Subgroup_2;uncultured_forest_soil_bacterium;uncultured_forest_soil_bacterium_unclassified;uncultured_forest_soil_bacterium_unclassified
HWI-M02808_115_AHB9G_1_2101_8967_14230	772	3	0	0	0	0	0	0	0	0	0	0	56	0	6	0	0	0	0	1	8	5	0	2	0	14	14	79	89	55	17	109	113	17	0	48	93	4	CAAT_Inhibited	Bacteria;Proteobacteria;Deltaproteobacteria;Deltaproteobacteria_unclassified;Deltaproteobacteria_unclassified;Deltaproteobacteria_unclassified;Deltaproteobacteria_unclassified
HWI-M02808_115_AHB9G_1_1101_14865_11434	771	39	0	0	0	17	0	2	0	0	0	0	99	18	13	14	26	11	61	11	33	91	12	133	1	0	0	10	34	26	19	0	4	0	0	2	3	0	CASE_Unique	Bacteria;Verrucomicrobia;Spartobacteria;Chthoniobacterales;DA101_soil_group;DA101_soil_group_unclassified;DA101_soil_group_unclassified
HWI-M02808_177_ANHM9_1_1113_7347_17499	771	0	0	0	0	0	0	0	1	0	0	0	0	0	4	0	14	0	0	0	601	0	82	0	0	0	0	0	0	0	0	0	0	0	0	0	0	0	CASE_Unique	Bacteria;Acidobacteria;Holophagae;Subgroup_10;ABS-19;ABS-19_unclassified;ABS-19_unclassified
HWI-M02808_115_AHB9G_1_1105_11443_24691	770	0	0	0	0	0	0	0	0	0	0	0	1	0	0	0	20	2	25	0	7	693	12	4	0	0	0	0	0	3	0	0	0	2	0	0	0	0	CASE_Unique	Bacteria;Cyanobacteria;Cyanobacteria;SubsectionIV;FamilyI;Nostoc;Nostoc_unclassified
HWI-M02808_177_ANHM9_1_2105_20420_7126	769	0	0	0	18	0	11	19	0	0	0	11	43	26	19	36	64	28	94	25	15	58	27	90	30	2	0	23	12	0	3	0	0	0	0	6	0	0	CASE_Unique	Bacteria;Proteobacteria;Alphaproteobacteria;Rhodospirillales;Acetobacteraceae;Acetobacteraceae_uncultured;Acetobacteraceae_unclassified
HWI-M02808_115_AHB9G_1_1102_27079_18399	766	0	0	5	37	35	1	10	0	4	3	49	49	9	0	12	0	9	30	0	4	17	0	116	7	46	0	20	46	33	55	35	11	18	16	26	9	33		Bacteria;Bacteroidetes;Sphingobacteriia;Sphingobacteriales;Sphingobacteriaceae;Mucilaginibacter;Mucilaginibacter_unclassified
HWI-M02808_115_AHB9G_1_1101_22568_4505	765	692	0	0	0	6	0	0	0	0	0	18	0	0	0	0	1	0	6	0	0	0	0	0	0	21	0	0	0	3	7	0	1	2	0	1	4	0		Bacteria;Verrucomicrobia;Spartobacteria;Chthoniobacterales;DA101_soil_group;uncultured_Verrucomicrobia_bacterium;uncultured_Verrucomicrobia_bacterium_unclassified
HWI-M02808_115_AHB9G_1_1102_26428_23408	765	68	0	0	0	59	0	6	0	0	1	66	36	8	125	2	5	7	4	0	9	0	2	12	0	0	1	74	2	180	69	3	0	0	0	0	0	0		Bacteria;Actinobacteria;Actinobacteria;Pseudonocardiales;Pseudonocardiaceae;Crossiella;Crossiella_unclassified
HWI-M02808_115_AHB9G_1_1101_9580_6135	760	0	0	0	0	0	0	0	0	0	0	0	0	0	0	0	0	0	0	0	0	0	0	0	0	272	0	5	0	0	0	46	38	113	0	69	22	195	Ground	Bacteria;Acidobacteria;Acidobacteria;Acidobacteriales;Acidobacteriaceae_(Subgroup_1);Acidobacteriaceae_(Subgroup_1)_uncultured;Acidobacteriaceae_(Subgroup_1)_unclassified
HWI-M02808_115_AHB9G_1_1105_26871_7709	759	10	0	17	14	19	0	45	0	0	0	0	23	0	8	18	6	4	36	7	0	0	2	19	6	25	25	54	25	104	17	94	28	33	6	20	29	16	Ground	Bacteria;Proteobacteria;Alphaproteobacteria;Rhodospirillales;Acetobacteraceae;Acetobacteraceae_unclassified;Acetobacteraceae_unclassified
HWI-M02808_115_AHB9G_1_1112_17440_27734	758	0	0	0	0	0	0	0	0	0	0	0	0	0	0	0	0	0	0	0	0	0	0	0	0	0	75	0	0	0	0	167	135	0	0	129	130	0	Ground	Bacteria;Proteobacteria;Alphaproteobacteria;Rhodospirillales;Rhodospirillaceae;Dongia;uncultured_bacterium
HWI-M02808_177_ANHM9_1_1101_6267_16736	752	0	3	245	0	0	0	0	10	0	0	0	0	0	0	0	0	0	0	0	0	0	0	0	0	0	0	0	0	0	0	0	0	0	468	0	0	0	Ground	Bacteria;Planctomycetes;Phycisphaerae;WD2101_soil_group;uncultured_bacterium;uncultured_bacterium_unclassified;uncultured_bacterium_unclassified
HWI-M02808_115_AHB9G_1_1107_19445_21053	750	0	0	3	83	29	11	58	0	0	1	33	81	8	4	3	61	17	41	3	10	102	13	117	1	0	2	4	0	10	0	24	0	1	0	0	0	2		Bacteria;Bacteroidetes;Sphingobacteriia;Sphingobacteriales;Chitinophagaceae;Chitinophagaceae_uncultured;Chitinophagaceae_unclassified
HWI-M02808_177_ANHM9_1_1109_20827_9861	750	0	0	5	436	1	2	1	0	0	2	38	2	10	0	109	0	1	0	8	0	0	0	23	7	0	0	0	0	0	0	0	0	0	0	0	0	0		Bacteria;Proteobacteria;Alphaproteobacteria;Rhizobiales;Rhizobiales_Incertae_Sedis;Rhizomicrobium;Rhizomicrobium_unclassified
HWI-M02808_115_AHB9G_1_1101_19683_28145	749	0	0	0	0	0	0	29	0	0	6	0	4	3	0	1	0	0	0	6	0	0	0	0	6	92	52	3	22	0	7	74	0	49	10	66	123	73	Ground	Bacteria;Acidobacteria;Acidobacteria;Subgroup_6;Subgroup_6_unclassified;Subgroup_6_unclassified;Subgroup_6_unclassified
HWI-M02808_115_AHB9G_1_1101_5814_14730	748	36	0	8	76	42	30	10	4	13	0	40	26	24	8	19	25	33	24	5	1	18	6	68	8	1	3	28	11	24	48	0	0	0	15	0	0	26		Bacteria;Acidobacteria;Acidobacteria;Acidobacteriales;Acidobacteriaceae_(Subgroup_1);Acidicapsa;Acidicapsa_unclassified
HWI-M02808_115_AHB9G_1_1111_23918_19762	744	2	21	52	18	56	75	24	0	103	11	27	0	17	0	149	10	8	5	7	0	0	0	5	14	3	2	11	4	9	24	5	0	0	0	0	0	0		Bacteria;Acidobacteria;Acidobacteria;Acidobacteriales;Acidobacteriaceae_(Subgroup_1);Acidobacteriaceae_(Subgroup_1)_unclassified;Acidobacteriaceae_(Subgroup_1)_unclassified
HWI-M02808_115_AHB9G_1_2105_7189_12740	743	0	0	0	0	0	0	0	0	0	0	0	0	0	0	0	0	0	0	0	0	0	0	0	0	230	27	0	0	0	0	0	0	37	89	126	53	181	Ground	Bacteria;Acidobacteria;Acidobacteria;Acidobacteriales;Acidobacteriaceae_(Subgroup_1);Acidobacteriaceae_(Subgroup_1)_uncultured;Acidobacteriaceae_(Subgroup_1)_unclassified
HWI-M02808_115_AHB9G_1_1101_8800_16272	741	55	8	0	3	35	1	42	5	0	11	21	11	14	6	10	18	9	20	13	1	0	3	30	6	41	4	38	80	45	53	12	1	0	0	9	7	0		Bacteria;Proteobacteria;Alphaproteobacteria;Rhodospirillales;JG37-AG-20;JG37-AG-20_unclassified;JG37-AG-20_unclassified
HWI-M02808_115_AHB9G_1_1107_11593_18413	739	11	0	0	0	2	2	0	0	0	0	3	36	0	0	2	0	0	3	7	0	0	0	0	0	0	0	0	51	17	602	0	1	0	0	0	0	0	Ground	Bacteria;Chlorobi;Chlorobia;Chlorobiales;SJA-28;uncultured_bacterium;uncultured_bacterium_unclassified
HWI-M02808_115_AHB9G_1_1102_10673_14429	737	0	0	0	0	19	0	0	0	0	0	65	21	0	27	5	4	4	1	5	4	0	6	0	0	0	0	0	103	0	55	0	312	6	0	0	47	17	Ground	Bacteria;Proteobacteria;Deltaproteobacteria;Myxococcales;BIrii41;uncultured_delta_proteobacterium;uncultured_delta_proteobacterium_unclassified
HWI-M02808_115_AHB9G_1_1109_25675_6986	736	0	0	4	20	7	12	0	0	5	6	2	10	5	0	18	2	7	2	3	0	0	0	4	9	67	26	16	0	0	1	29	119	52	0	173	86	30	Ground	Bacteria;Proteobacteria;Alphaproteobacteria;Rhizobiales;Rhizobiales_unclassified;Rhizobiales_unclassified;Rhizobiales_unclassified
HWI-M02808_115_AHB9G_1_1104_22925_11451	736	0	0	0	0	0	0	0	0	0	0	0	0	0	0	0	0	0	0	0	0	0	0	0	0	25	23	125	141	93	0	75	90	43	0	59	26	11	Ground	Bacteria;Proteobacteria;Betaproteobacteria;Nitrosomonadales;Nitrosomonadaceae;Nitrosomonadaceae_uncultured;Nitrosomonadaceae_unclassified
HWI-M02808_115_AHB9G_1_2109_16593_21793	733	0	0	0	1	0	0	1	0	0	0	0	0	0	0	0	0	0	3	0	0	0	0	0	0	0	15	43	3	6	0	49	98	0	1	95	271	109	Ground	Bacteria;Acidobacteria;Acidobacteria;Subgroup_2;Subgroup_2_unclassified;Subgroup_2_unclassified;Subgroup_2_unclassified
HWI-M02808_115_AHB9G_1_2101_7828_18800	733	7	0	0	28	0	0	21	0	0	0	0	29	3	17	0	78	47	58	14	15	30	13	54	9	0	0	31	0	43	31	0	0	0	10	87	0	0	CAAT_Inhibited	Bacteria;Actinobacteria;Actinobacteria;Corynebacteriales;Mycobacteriaceae;Mycobacterium;Mycobacterium_unclassified
HWI-M02808_115_AHB9G_1_2113_16569_11282	732	0	5	54	43	80	92	60	8	0	4	59	104	3	0	43	8	38	0	0	0	0	0	29	4	19	0	0	0	0	0	5	0	0	41	0	0	11		Bacteria;Bacteroidetes;Sphingobacteriia;Sphingobacteriales;Sphingobacteriaceae;Sphingobacteriaceae_unclassified;Sphingobacteriaceae_unclassified
HWI-M02808_115_AHB9G_1_1102_7900_15352	732	10	0	424	21	5	0	0	8	171	5	11	20	0	0	17	0	0	0	0	0	0	0	0	2	0	0	0	0	0	8	1	0	0	9	0	0	1		Bacteria;Acidobacteria;Acidobacteria;Subgroup_3;Unknown_Family;Bryobacter;Bryobacter_unclassified
HWI-M02808_115_AHB9G_1_1101_27459_9407	728	0	0	0	0	0	0	0	0	0	0	0	0	0	0	0	0	0	0	0	0	0	0	0	0	191	44	0	0	0	0	223	0	202	0	0	0	68	Ground	Bacteria;Nitrospirae;Nitrospira;Nitrospirales;Nitrospiraceae;Nitrospira;Nitrospira_unclassified
HWI-M02808_115_AHB9G_1_1101_9423_8484	725	529	33	50	2	0	0	0	0	0	0	7	0	0	0	0	0	6	0	0	0	0	0	0	0	44	0	0	5	0	4	0	0	0	0	0	0	0		Bacteria;Verrucomicrobia;OPB35_soil_group;bacterium_enrichment_culture_clone_auto67_4W;bacterium_enrichment_culture_clone_auto67_4W_unclassified;bacterium_enrichment_culture_clone_auto67_4W_unclassified;bacterium_enrichment_culture_clone_auto67_4W_unclassified
HWI-M02808_115_AHB9G_1_1102_25068_10937	724	7	0	0	0	0	0	2	0	0	0	2	0	0	0	0	0	0	0	0	0	0	0	0	0	24	25	67	55	129	1	53	39	53	2	85	106	36	Ground	Bacteria;Proteobacteria;Betaproteobacteria;SC-I-84;SC-I-84_unclassified;SC-I-84_unclassified;SC-I-84_unclassified
HWI-M02808_115_AHB9G_1_1101_4286_9228	716	0	0	71	0	14	39	10	0	0	351	25	0	137	0	29	0	0	0	0	0	0	0	0	0	0	0	0	0	0	0	0	0	0	0	0	0	0		Bacteria;Proteobacteria;Alphaproteobacteria;Rhodospirillales;Acetobacteraceae;Acetobacteraceae_unclassified;Acetobacteraceae_unclassified
HWI-M02808_115_AHB9G_1_1101_9731_16763	715	36	0	73	15	0	61	48	0	77	27	64	0	26	0	59	0	50	0	8	0	0	0	0	13	0	0	0	21	34	44	0	0	0	0	0	0	0		Bacteria;Proteobacteria;Gammaproteobacteria;Xanthomonadales;Xanthomonadales_uncultured;Xanthomonadales_unclassified;Xanthomonadales_unclassified
HWI-M02808_115_AHB9G_1_1101_21485_9930	714	19	4	8	4	10	0	0	0	0	0	8	2	3	2	11	6	0	6	0	0	2	1	0	5	97	22	13	8	23	31	97	35	42	80	34	23	39	Ground	Bacteria;Proteobacteria;Alphaproteobacteria;Rhodospirillales;Acetobacteraceae;Acetobacteraceae_uncultured;Acetobacteraceae_unclassified
HWI-M02808_115_AHB9G_1_1101_19642_21027	713	38	7	0	36	0	6	124	3	0	3	27	67	18	0	48	49	8	68	0	0	62	13	32	0	0	0	0	0	0	16	0	0	0	0	0	0	0		Bacteria;Bacteroidetes;Sphingobacteriia;Sphingobacteriales;Chitinophagaceae;Parafilimonas;Parafilimonas_unclassified
HWI-M02808_115_AHB9G_1_1104_14872_7357	713	5	0	1	7	87	1	3	0	0	0	188	17	0	9	0	12	3	37	0	0	0	0	0	1	0	0	28	11	16	219	20	3	5	0	10	6	7		Bacteria;Bacteroidetes;Sphingobacteriia;Sphingobacteriales;Chitinophagaceae;Chitinophagaceae_unclassified;Chitinophagaceae_unclassified
HWI-M02808_177_ANHM9_1_1101_13927_6419	709	0	1	0	8	10	2	44	0	0	0	1	5	0	10	0	5	0	10	2	0	16	3	40	0	4	8	75	87	152	30	37	33	19	0	41	18	4	Ground	Bacteria;Verrucomicrobia;OPB35_soil_group;uncultured_verrucomicrobium_DEV059;uncultured_verrucomicrobium_DEV059_unclassified;uncultured_verrucomicrobium_DEV059_unclassified;uncultured_verrucomicrobium_DEV059_unclassified
HWI-M02808_115_AHB9G_1_1103_23313_26492	706	16	30	0	11	30	72	5	28	0	72	32	19	16	0	64	0	4	1	0	0	0	0	0	17	10	0	0	0	0	3	11	0	0	21	0	0	0		Bacteria;Actinobacteria;Thermoleophilia;Solirubrobacterales;YNPFFP1;uncultured_bacterium;uncultured_bacterium_unclassified
HWI-M02808_115_AHB9G_1_1106_25131_16457	702	43	0	6	37	0	10	0	11	0	0	15	40	0	0	9	13	7	82	14	0	0	0	18	0	29	4	32	56	52	54	19	31	33	1	26	17	26		Bacteria;Verrucomicrobia;Opitutae;Opitutales;Opitutaceae;Opitutus;Opitutus_unclassified
HWI-M02808_115_AHB9G_1_1101_12558_2435	700	0	0	42	68	39	90	30	19	46	7	81	18	9	0	45	0	33	5	4	0	0	0	6	0	0	0	0	0	0	44	0	0	0	0	0	0	0		Bacteria;Verrucomicrobia;Opitutae;Opitutales;Opitutaceae;Opitutus;uncultured_bacterium
HWI-M02808_115_AHB9G_1_1102_10992_3548	697	0	0	0	0	0	0	0	0	0	0	0	0	0	0	0	0	0	0	0	0	0	0	0	0	44	20	4	0	0	0	11	91	49	0	197	226	32	Ground	Bacteria;Proteobacteria;Alphaproteobacteria;Rhizobiales;Rhodobiaceae;Rhodobiaceae_uncultured;Rhodobiaceae_unclassified
HWI-M02808_115_AHB9G_1_1103_21626_12123	697	3	0	34	15	61	0	7	0	0	17	107	31	21	0	101	0	29	56	2	0	0	0	25	25	19	0	14	0	6	37	0	2	25	0	7	0	0		Bacteria;Bacteroidetes;Sphingobacteriia;Sphingobacteriales;Chitinophagaceae;Chitinophagaceae_uncultured;Chitinophagaceae_unclassified
HWI-M02808_115_AHB9G_1_1106_4128_14605	694	0	0	0	0	0	0	22	0	0	0	0	0	0	0	0	0	0	0	0	0	0	0	0	0	110	23	0	31	0	0	71	0	17	333	0	0	87	Ground	Bacteria;Acidobacteria;Acidobacteria;Subgroup_3;Unknown_Family;Bryobacter;uncultured_Acidobacteria_bacterium
HWI-M02808_115_AHB9G_1_1104_19335_19463	694	34	1	0	4	13	0	4	0	0	5	18	18	8	9	18	14	11	17	6	18	50	5	22	0	6	13	76	35	26	45	0	32	10	8	44	25	12		Bacteria;Proteobacteria;Alphaproteobacteria;Rhizobiales;Phyllobacteriaceae;Phyllobacteriaceae_unclassified;Phyllobacteriaceae_unclassified
HWI-M02808_115_AHB9G_1_1101_12527_9424	691	166	27	77	0	0	13	142	120	0	8	0	0	0	0	0	0	0	2	0	0	0	0	0	0	12	1	4	4	0	0	1	8	0	0	12	0	0		Bacteria;Bacteroidetes;Sphingobacteriia;Sphingobacteriales;Chitinophagaceae;Flavisolibacter;uncultured_bacterium
HWI-M02808_115_AHB9G_1_2103_18699_26791	682	0	0	0	3	0	0	0	0	0	0	0	0	0	0	0	0	0	0	0	0	0	0	0	0	103	30	9	0	0	0	42	61	92	3	132	124	79	Ground	Bacteria;Proteobacteria;Alphaproteobacteria;Rhizobiales;Rhodobiaceae;Rhodobiaceae_uncultured;uncultured_Rhizobiales_bacterium
HWI-M02808_115_AHB9G_1_1109_22305_25143	680	20	29	0	36	60	0	50	58	88	14	34	0	0	0	86	5	0	0	4	0	0	0	4	0	22	0	4	0	19	42	0	0	0	18	0	0	0		Bacteria;Proteobacteria;Alphaproteobacteria;Rhizobiales;Rhizobiales_unclassified;Rhizobiales_unclassified;Rhizobiales_unclassified
HWI-M02808_115_AHB9G_1_1101_23473_22258	676	96	0	0	0	0	0	126	0	0	0	0	0	0	3	0	0	0	0	0	0	0	0	0	0	171	0	0	0	0	0	0	0	0	147	0	0	109		Bacteria;Proteobacteria;Alphaproteobacteria;Rhizobiales;Rhizobiales_Incertae_Sedis;Rhizomicrobium;Rhizomicrobium_unclassified
HWI-M02808_115_AHB9G_1_1101_11335_19113	675	0	0	0	0	0	0	62	0	0	0	26	13	5	28	0	0	0	10	78	6	0	20	0	0	0	0	63	0	22	259	0	0	0	0	0	0	0	Ground	Bacteria;Actinobacteria;Actinobacteria;Streptomycetales;Streptomycetaceae;Streptomycetaceae_unclassified;Streptomycetaceae_unclassified
HWI-M02808_177_ANHM9_1_1102_13473_23888	675	0	7	68	0	0	21	70	0	0	0	0	0	0	0	29	0	0	0	0	0	0	0	0	12	0	0	0	0	0	259	0	0	0	123	0	0	0		Bacteria;Verrucomicrobia;OPB35_soil_group;OPB35_soil_group_unclassified;OPB35_soil_group_unclassified;OPB35_soil_group_unclassified;OPB35_soil_group_unclassified
HWI-M02808_177_ANHM9_1_1107_21370_11847	674	0	0	0	0	0	0	0	0	0	0	0	0	0	0	0	0	0	0	0	0	0	0	0	0	0	0	146	0	281	0	14	82	0	0	28	110	0	Ground	Bacteria;Bacteroidetes;Cytophagia;Cytophagales;Cytophagaceae;Cytophagaceae_unclassified;Cytophagaceae_unclassified
HWI-M02808_115_AHB9G_1_1101_19425_7927	670	0	0	51	51	93	83	0	0	0	21	0	0	0	0	0	0	0	0	48	4	0	0	0	0	0	24	0	0	0	0	0	70	16	0	121	56	0		Bacteria;Acidobacteria;Acidobacteria;Acidobacteriales;Acidobacteriaceae_(Subgroup_1);Acidobacteriaceae_(Subgroup_1)_uncultured;Acidobacteriaceae_(Subgroup_1)_unclassified
HWI-M02808_115_AHB9G_1_1101_18502_5062	666	44	6	0	0	0	0	112	0	0	2	25	0	0	0	0	0	3	0	0	0	0	0	0	0	21	1	12	68	30	277	9	0	0	0	0	0	0		Bacteria;Verrucomicrobia;Opitutae;Opitutales;Opitutaceae;Opitutus;Opitutus_unclassified
HWI-M02808_115_AHB9G_1_1101_15785_4677	665	0	0	21	149	286	96	0	0	0	4	99	0	2	0	0	0	0	0	0	0	0	0	0	0	0	0	0	0	0	0	0	0	0	0	0	0	0		Bacteria;Bacteroidetes;Sphingobacteriia;Sphingobacteriales;Chitinophagaceae;Chitinophagaceae_unclassified;Chitinophagaceae_unclassified
HWI-M02808_115_AHB9G_1_1110_22119_13490	665	3	0	0	0	4	0	0	1	0	0	0	0	0	0	0	1	1	0	0	0	1	57	188	0	9	69	2	0	1	5	0	49	0	0	8	194	2	CAAT_Inhibited	Bacteria;Proteobacteria;Gammaproteobacteria;Enterobacteriales;Enterobacteriaceae;Enterobacteriaceae_unclassified;Enterobacteriaceae_unclassified
HWI-M02808_115_AHB9G_1_1101_8716_27100	665	19	51	289	0	0	0	0	11	179	0	0	0	0	0	0	0	0	0	0	0	0	0	0	0	0	0	0	3	0	0	0	0	0	4	0	0	0		Bacteria;Acidobacteria;Acidobacteria;Acidobacteriales;Acidobacteriaceae_(Subgroup_1);Acidobacteriaceae_(Subgroup_1)_uncultured;uncultured_Acidobacteria_bacterium
HWI-M02808_115_AHB9G_1_1103_8890_25508	662	17	0	22	61	105	63	22	0	11	7	46	43	7	0	53	25	6	0	20	0	0	1	0	9	10	2	0	0	12	31	14	1	8	2	6	17	10		Bacteria;Planctomycetes;Planctomycetacia;Planctomycetales;Planctomycetaceae;Planctomycetaceae_uncultured;Planctomycetaceae_unclassified
HWI-M02808_115_AHB9G_1_2110_20226_5032	660	1	17	80	47	49	11	2	31	72	41	39	0	12	0	25	0	0	0	0	0	0	0	0	12	1	4	0	0	0	4	2	0	0	64	0	0	3		Bacteria;WD272;uncultured_bacterium;uncultured_bacterium_unclassified;uncultured_bacterium_unclassified;uncultured_bacterium_unclassified;uncultured_bacterium_unclassified
HWI-M02808_115_AHB9G_1_1101_16766_10284	660	26	4	30	58	39	53	12	3	0	4	20	10	14	0	49	71	18	0	0	1	9	1	0	13	5	0	0	0	0	112	0	0	0	49	12	0	21		Bacteria;Bacteroidetes;Sphingobacteriia;Sphingobacteriales;Sphingobacteriaceae;Mucilaginibacter;Mucilaginibacter_unclassified
HWI-M02808_177_ANHM9_1_1112_12532_11054	659	0	0	9	33	39	151	0	1	67	34	160	0	15	0	74	0	0	0	0	0	0	0	0	35	0	0	0	0	0	0	0	0	0	0	0	0	0		Bacteria;Chloroflexi;Ktedonobacteria;Ktedonobacterales;Ktedonobacterales_unclassified;Ktedonobacterales_unclassified;Ktedonobacterales_unclassified
HWI-M02808_115_AHB9G_1_1101_25733_20132	657	93	0	0	0	0	0	0	0	0	0	0	0	0	0	0	0	0	0	0	0	0	0	0	0	38	11	0	0	0	0	57	10	0	0	0	23	41		Bacteria;Acidobacteria;Holophagae;Subgroup_7;uncultured_candidate_division_OS-K_bacterium;uncultured_candidate_division_OS-K_bacterium_unclassified;uncultured_candidate_division_OS-K_bacterium_unclassified
HWI-M02808_177_ANHM9_1_1108_23582_12819	655	0	4	1	8	0	28	96	45	55	0	86	4	83	0	0	0	0	0	7	0	0	0	1	0	0	0	0	0	0	101	0	0	0	17	0	0	0		Bacteria;Chloroflexi;Ktedonobacteria;Ktedonobacterales;Thermosporotrichaceae;Thermosporotrichaceae_uncultured;Thermosporotrichaceae_unclassified
HWI-M02808_115_AHB9G_1_1108_19072_15914	655	0	9	0	14	0	15	0	0	0	0	19	0	0	14	0	18	0	46	5	6	17	7	35	0	0	18	37	67	26	0	84	15	35	0	74	0	33		Bacteria;Proteobacteria;Alphaproteobacteria;Caulobacterales;Caulobacteraceae;Phenylobacterium;Phenylobacterium_unclassified
HWI-M02808_115_AHB9G_1_1103_19223_16030	653	15	11	0	0	388	0	16	0	0	2	0	0	5	0	0	0	0	0	1	0	0	0	0	5	42	1	3	0	0	14	20	18	12	18	0	0	34		Bacteria;Chloroflexi;KD4-96;uncultured_Chloroflexi_bacterium;uncultured_Chloroflexi_bacterium_unclassified;uncultured_Chloroflexi_bacterium_unclassified;uncultured_Chloroflexi_bacterium_unclassified
HWI-M02808_115_AHB9G_1_1108_22455_5407	653	9	12	107	15	47	43	38	22	140	9	12	1	6	0	27	0	3	0	0	0	0	0	0	3	22	0	0	0	0	23	11	0	0	21	0	0	9		Bacteria;Proteobacteria;Deltaproteobacteria;GR-WP33-30;uncultured_Firmicutes_bacterium;uncultured_Firmicutes_bacterium_unclassified;uncultured_Firmicutes_bacterium_unclassified
HWI-M02808_115_AHB9G_1_1101_21766_15718	651	62	17	0	0	29	25	23	0	0	21	0	12	5	0	20	0	0	7	0	0	0	0	0	24	39	1	0	1	0	9	12	6	9	137	28	1	18		Bacteria;Actinobacteria;Thermoleophilia;Gaiellales;Gaiellales_uncultured;bacterium_Ellin6517;bacterium_Ellin6517_unclassified
HWI-M02808_115_AHB9G_1_1101_14415_14259	651	346	0	2	0	0	0	0	0	0	0	0	0	0	0	0	0	0	0	0	0	0	0	0	0	0	0	0	0	272	0	0	0	0	0	0	0	0		Bacteria;Proteobacteria;Betaproteobacteria;Nitrosomonadales;Nitrosomonadaceae;Nitrosomonadaceae_uncultured;uncultured_Nitrosomonadaceae_bacterium
HWI-M02808_115_AHB9G_1_1102_11387_7317	646	0	0	0	81	0	6	18	0	9	0	10	91	16	13	24	61	0	98	0	0	73	5	107	0	0	0	1	0	4	0	0	0	0	0	0	0	0		Bacteria;Acidobacteria;Acidobacteria;Acidobacteriales;Acidobacteriaceae_(Subgroup_1);Granulicella;Granulicella_unclassified
HWI-M02808_115_AHB9G_1_1107_23170_23336	646	10	0	0	0	0	0	0	0	0	0	0	18	0	7	0	20	2	35	0	0	48	11	0	0	0	3	131	23	100	2	38	43	49	0	28	52	14	CAAT_Inhibited	Bacteria;Bacteroidetes;Sphingobacteriia;Sphingobacteriales;Chitinophagaceae;Ferruginibacter;uncultured_Ferruginibacter_sp.
HWI-M02808_115_AHB9G_1_1103_12352_19953	645	0	1	0	0	0	0	0	0	0	0	0	0	0	0	0	0	0	0	0	0	0	0	550	29	0	0	0	0	0	0	0	0	0	0	0	0	0	CAAT_Inhibited	Bacteria;Actinobacteria;Actinobacteria;Kineosporiales;Kineosporiaceae;Kineosporia;uncultured_bacterium
HWI-M02808_115_AHB9G_1_1108_5098_21868	645	0	0	0	0	0	0	0	0	0	0	0	0	0	0	0	0	0	0	0	0	0	0	0	0	25	5	44	0	4	0	82	57	68	1	117	125	108	Ground	Bacteria;Verrucomicrobia;Spartobacteria;Chthoniobacterales;DA101_soil_group;uncultured_Prosthecobacter_sp.;uncultured_Prosthecobacter_sp._unclassified
HWI-M02808_115_AHB9G_1_1101_15788_16344	643	92	17	0	14	55	2	71	0	3	0	38	34	0	0	5	3	0	10	6	0	0	1	0	2	24	0	0	20	4	81	5	3	0	76	13	0	2		Bacteria;Proteobacteria;Betaproteobacteria;SC-I-84;SC-I-84_unclassified;SC-I-84_unclassified;SC-I-84_unclassified
HWI-M02808_115_AHB9G_1_1101_16149_4844	643	0	0	0	0	0	0	0	0	0	0	0	0	0	0	0	0	0	0	0	0	0	0	0	0	98	31	24	0	0	0	95	123	52	0	69	32	98	Ground	Bacteria;Proteobacteria;Betaproteobacteria;Burkholderiales;Comamonadaceae;Comamonadaceae_unclassified;Comamonadaceae_unclassified
HWI-M02808_115_AHB9G_1_2104_21517_22625	642	7	1	11	39	33	14	50	0	0	3	17	25	13	21	17	26	9	76	7	8	52	24	67	12	0	0	11	12	20	11	0	0	0	0	0	0	0		Bacteria;Actinobacteria;Actinobacteria;Frankiales;Frankiales_unclassified;Frankiales_unclassified;Frankiales_unclassified
HWI-M02808_115_AHB9G_1_1101_15356_26703	642	15	4	5	58	6	12	23	0	0	0	9	25	10	8	36	49	0	21	6	3	0	0	47	14	12	0	21	25	12	81	4	24	7	0	16	14	6		Bacteria;Proteobacteria;Alphaproteobacteria;Caulobacterales;Caulobacteraceae;Asticcacaulis;uncultured_Asticcacaulis_sp.
HWI-M02808_115_AHB9G_1_1103_7775_10397	638	13	0	0	43	1	3	0	0	0	0	29	0	0	0	0	1	0	0	0	0	1	0	0	0	2	29	166	0	0	24	28	32	1	1	55	176	0		Bacteria;Proteobacteria;Gammaproteobacteria;Pseudomonadales;Pseudomonadaceae;Pseudomonas;Pseudomonas_unclassified
HWI-M02808_115_AHB9G_1_1103_10942_15748	635	1	0	0	0	0	0	1	0	0	0	0	0	0	0	0	0	0	0	0	0	0	0	0	0	155	7	0	0	0	0	139	26	25	0	135	74	72	Ground	Bacteria;Proteobacteria;Alphaproteobacteria;Rhizobiales;Xanthobacteraceae;Variibacter;uncultured_Hyphomicrobiaceae_bacterium
HWI-M02808_115_AHB9G_1_1102_9674_27155	634	26	58	161	0	0	0	0	60	128	0	0	0	0	0	0	0	0	0	0	0	0	0	0	0	64	0	0	0	0	3	0	3	3	68	0	0	11		Bacteria;Proteobacteria;Gammaproteobacteria;Xanthomonadales;Xanthomonadales_Incertae_Sedis;Acidibacter;Acidibacter_unclassified
HWI-M02808_115_AHB9G_1_2106_10901_20251	634	2	24	0	17	3	0	2	0	0	0	73	5	2	0	1	0	1	10	1	0	0	0	0	0	94	22	0	1	1	8	87	24	0	0	78	15	144		Bacteria;Proteobacteria;Alphaproteobacteria;Rhizobiales;Rhizobiales_unclassified;Rhizobiales_unclassified;Rhizobiales_unclassified
HWI-M02808_115_AHB9G_1_1113_26144_10775	634	0	0	0	0	0	0	0	0	0	0	0	0	0	0	0	9	1	0	0	87	493	37	0	0	0	0	0	0	0	0	0	2	0	0	0	0	0	CASE_Unique	Bacteria;Bacteroidetes;Sphingobacteriia;Sphingobacteriales;Chitinophagaceae;Chitinophagaceae_unclassified;Chitinophagaceae_unclassified
HWI-M02808_115_AHB9G_1_1113_12178_22866	632	0	10	2	17	36	7	38	0	0	2	28	33	22	6	19	19	11	30	22	5	0	14	13	15	10	7	15	7	13	30	13	4	10	23	14	0	0		Bacteria;Proteobacteria;Alphaproteobacteria;Sphingomonadales;Plot4-2H12;uncultured_Sphingomonadaceae_bacterium;uncultured_Sphingomonadaceae_bacterium_unclassified
HWI-M02808_115_AHB9G_1_1101_16698_23083	631	40	3	0	0	0	0	18	0	0	0	5	0	0	3	0	0	0	0	0	0	0	0	0	0	0	13	33	120	192	189	0	0	0	0	0	0	0	GRPE_Unique	Bacteria;Proteobacteria;Alphaproteobacteria;Rhizobiales;Rhizobiales_Incertae_Sedis;Rhizomicrobium;uncultured_alpha_proteobacterium
HWI-M02808_115_AHB9G_1_1101_6561_6441	631	6	1	0	0	0	0	16	0	0	0	0	8	0	6	46	3	1	27	3	0	0	0	13	0	15	0	58	79	86	80	18	15	21	3	0	93	0	Ground	Bacteria;Bacteroidetes;Sphingobacteriia;Sphingobacteriales;Chitinophagaceae;Ferruginibacter;uncultured_Bacteroidetes_bacterium
HWI-M02808_115_AHB9G_1_1101_22655_15105	627	0	0	0	0	0	0	0	0	0	0	0	0	0	0	0	0	0	0	0	0	0	0	0	0	170	23	0	0	0	0	130	32	100	20	19	16	99	Ground	Bacteria;Proteobacteria;Gammaproteobacteria;Xanthomonadales;Xanthomonadales_Incertae_Sedis;Xanthomonadales_Incertae_Sedis_uncultured;uncultured_bacterium
HWI-M02808_115_AHB9G_1_1102_6696_9133	626	0	0	0	0	0	0	0	0	0	0	0	37	0	6	0	0	0	0	0	0	0	3	0	0	23	15	82	12	5	0	264	53	49	0	26	29	5	CAAT_Inhibited	Bacteria;Proteobacteria;Gammaproteobacteria;Xanthomonadales;Xanthomonadales_Incertae_Sedis;Acidibacter;Acidibacter_unclassified
HWI-M02808_115_AHB9G_1_1101_12665_9416	625	10	0	0	0	0	0	4	1	0	0	0	0	0	0	0	0	0	0	0	0	0	0	0	0	67	27	6	3	5	0	66	50	82	0	135	71	70	Ground	Bacteria;Proteobacteria;Alphaproteobacteria;Rhizobiales;Rhizobiales_unclassified;Rhizobiales_unclassified;Rhizobiales_unclassified
HWI-M02808_177_ANHM9_1_2109_17809_25585	625	0	0	0	14	8	5	0	0	0	0	11	46	3	0	14	104	9	130	2	14	76	23	86	0	0	0	4	9	11	2	1	3	3	8	0	0	0	CASE_Unique	Bacteria;Cyanobacteria;Chloroplast;uncultured_eubacterium_WD215;uncultured_eubacterium_WD215_unclassified;uncultured_eubacterium_WD215_unclassified;uncultured_eubacterium_WD215_unclassified
HWI-M02808_177_ANHM9_1_1103_11321_21177	624	0	0	0	193	34	50	0	0	0	0	85	19	0	9	29	56	41	3	0	0	44	5	0	17	0	0	0	0	1	14	0	0	0	0	0	0	0		Bacteria;Acidobacteria;Acidobacteria;Acidobacteriales;Acidobacteriaceae_(Subgroup_1);Granulicella;Granulicella_unclassified
HWI-M02808_115_AHB9G_1_1101_14441_9926	621	13	5	5	8	10	7	17	0	0	0	9	18	20	19	8	17	13	69	45	12	10	11	50	17	7	5	17	39	43	39	2	0	0	1	1	0	0	CASE_Unique	Bacteria;Actinobacteria;Thermoleophilia;Gaiellales;Gaiellales_uncultured;bacterium_Ellin6515;bacterium_Ellin6515_unclassified
HWI-M02808_115_AHB9G_1_1111_24688_9695	621	0	0	0	0	0	0	0	0	0	0	0	5	0	2	0	0	0	0	0	0	0	0	0	0	72	27	32	53	29	22	105	41	49	0	67	114	3	Ground	Bacteria;Proteobacteria;Alphaproteobacteria;Caulobacterales;Hyphomonadaceae;Woodsholea;uncultured_bacterium
HWI-M02808_115_AHB9G_1_1113_16505_6182	621	0	0	78	20	77	60	24	7	84	9	51	0	12	0	69	7	6	14	4	0	0	3	14	1	10	0	0	12	0	37	0	0	0	0	0	0	0		Bacteria;Cyanobacteria;Melainabacteria;Obscuribacterales;uncultured_bacterium;uncultured_bacterium_unclassified;uncultured_bacterium_unclassified
HWI-M02808_115_AHB9G_1_1113_23650_25196	621	0	1	14	0	33	0	23	0	0	0	3	21	1	9	0	0	0	0	2	0	0	0	0	1	18	10	0	71	61	59	23	76	40	0	55	36	23	Ground	Bacteria;Proteobacteria;Betaproteobacteria;Burkholderiales;Comamonadaceae;Comamonadaceae_unclassified;Comamonadaceae_unclassified
HWI-M02808_177_ANHM9_1_1101_13788_5007	618	0	214	0	0	0	0	0	33	0	3	0	1	0	0	43	0	0	0	1	0	0	0	0	0	0	0	0	0	0	0	8	0	0	176	0	0	0		Bacteria;Actinobacteria;Thermoleophilia;Solirubrobacterales;Solirubrobacterales_unclassified;Solirubrobacterales_unclassified;Solirubrobacterales_unclassified
HWI-M02808_115_AHB9G_1_1104_19111_28387	618	0	7	0	0	0	0	38	1	0	0	29	33	0	0	0	48	16	13	0	0	11	3	76	0	76	8	23	32	45	41	28	6	12	31	8	3	11		Bacteria;Proteobacteria;Alphaproteobacteria;Rhizobiales;Rhizobiales_Incertae_Sedis;Rhizomicrobium;Rhizomicrobium_unclassified
HWI-M02808_115_AHB9G_1_1101_14270_13823	616	35	2	0	13	73	0	83	0	0	4	2	7	20	1	4	4	0	83	7	0	0	0	10	8	21	0	35	0	0	61	0	0	0	4	0	0	0		Bacteria;Proteobacteria;Alphaproteobacteria;Alphaproteobacteria_unclassified;Alphaproteobacteria_unclassified;Alphaproteobacteria_unclassified;Alphaproteobacteria_unclassified
HWI-M02808_115_AHB9G_1_1102_25047_24656	614	28	0	0	9	28	0	53	0	0	3	0	19	15	36	0	12	5	100	19	2	0	2	46	0	0	23	42	24	30	47	0	14	0	0	3	0	0		Bacteria;Chloroflexi;TK10;TK10_unclassified;TK10_unclassified;TK10_unclassified;TK10_unclassified
HWI-M02808_115_AHB9G_1_1102_3100_12816	614	87	0	0	0	19	0	12	0	0	0	24	28	0	0	0	17	0	29	6	0	0	0	60	0	17	0	47	54	20	66	34	23	6	0	12	17	8		Bacteria;Acidobacteria;Acidobacteria;Subgroup_3;Unknown_Family;Candidatus_Solibacter;uncultured_Acidobacteria_bacterium
HWI-M02808_177_ANHM9_1_1107_23342_24732	613	0	2	1	16	55	0	50	0	0	0	101	25	3	7	2	26	1	61	14	0	0	0	16	7	3	13	11	48	7	79	11	5	5	0	8	0	0		Bacteria;Bacteroidetes;Sphingobacteriia;Sphingobacteriales;Chitinophagaceae;Chitinophagaceae_unclassified;Chitinophagaceae_unclassified
HWI-M02808_177_ANHM9_1_1101_14838_7942	613	0	22	80	53	14	0	59	0	15	1	14	42	2	14	6	35	7	66	6	0	0	1	90	2	2	0	4	2	0	51	7	0	2	0	0	0	0		Bacteria;Bacteroidetes;Sphingobacteriia;Sphingobacteriales;Sphingobacteriaceae;Mucilaginibacter;Mucilaginibacter_unclassified
HWI-M02808_177_ANHM9_1_1107_13193_14833	607	0	13	160	0	0	12	0	196	128	46	0	0	0	0	6	0	0	0	0	0	0	0	0	0	0	0	0	1	0	0	0	0	0	0	0	0	0		Bacteria;Actinobacteria;Actinobacteria;Frankiales;Acidothermaceae;Acidothermus;Acidothermus_unclassified
HWI-M02808_177_ANHM9_1_1112_9399_15531	605	0	0	0	0	0	0	0	0	0	0	0	0	0	0	0	0	0	0	0	0	0	0	0	0	0	0	0	311	275	0	0	0	0	0	0	19	0	Ground	Bacteria;Proteobacteria;Alphaproteobacteria;Rhizobiales;Rhizobiales_unclassified;Rhizobiales_unclassified;Rhizobiales_unclassified
HWI-M02808_177_ANHM9_1_1107_15479_10578	604	0	10	43	65	71	44	22	5	32	16	57	0	14	0	122	2	0	0	0	0	0	0	0	27	0	0	0	0	0	19	0	0	0	3	0	0	0		Bacteria;Chloroflexi;Anaerolineae;Anaerolineales;Anaerolineaceae;Anaerolineaceae_uncultured;uncultured_Gemmatimonadetes_bacterium
HWI-M02808_115_AHB9G_1_1101_20973_22836	602	141	1	0	0	20	0	0	0	0	0	0	11	0	0	0	0	2	0	0	13	0	13	0	0	18	27	25	42	47	26	27	36	26	0	33	46	10		Bacteria;Chloroflexi;KD4-96;uncultured_Chloroflexi_bacterium;uncultured_Chloroflexi_bacterium_unclassified;uncultured_Chloroflexi_bacterium_unclassified;uncultured_Chloroflexi_bacterium_unclassified
HWI-M02808_115_AHB9G_1_1110_10930_11648	601	8	0	2	0	2	0	4	0	0	1	2	25	12	0	0	46	1	14	12	1	6	0	1	1	6	7	78	9	65	36	12	30	71	0	0	60	4	CAAT_Inhibited	Bacteria;Proteobacteria;Alphaproteobacteria;Caulobacterales;Caulobacteraceae;Caulobacter;Caulobacter_unclassified
HWI-M02808_115_AHB9G_1_1101_7179_13671	600	40	16	0	0	0	125	0	110	50	12	0	9	2	0	51	0	0	0	1	0	0	0	0	0	0	0	0	11	0	9	6	0	11	0	0	0	0		Bacteria;Acidobacteria;Acidobacteria;Acidobacteriales;Acidobacteriaceae_(Subgroup_1);Acidobacteriaceae_(Subgroup_1)_uncultured;uncultured_forest_soil_bacterium
HWI-M02808_115_AHB9G_1_1101_19658_7498	599	114	13	0	11	131	0	18	0	0	0	19	32	0	5	0	7	0	13	32	0	0	0	15	0	0	0	0	12	41	19	3	0	0	0	0	0	0		Bacteria;Acidobacteria;Acidobacteria;Subgroup_6;Subgroup_6_unclassified;Subgroup_6_unclassified;Subgroup_6_unclassified
HWI-M02808_115_AHB9G_1_1101_15351_9016	599	85	45	0	0	0	57	81	0	0	0	0	2	0	0	0	0	14	0	45	0	0	0	0	0	22	0	5	0	0	6	21	6	0	0	0	0	0		Bacteria;Actinobacteria;Thermoleophilia;Solirubrobacterales;TM146;uncultured_Conexibacteraceae_bacterium;uncultured_Conexibacteraceae_bacterium_unclassified
HWI-M02808_115_AHB9G_1_1102_23069_11033	598	26	0	0	4	0	0	0	0	0	0	7	79	0	41	0	0	1	88	27	0	0	89	0	0	0	0	0	0	18	9	0	0	2	0	9	0	0	CAAT_Inhibited	Bacteria;Acidobacteria;Holophagae;Subgroup_7;Subgroup_7_unclassified;Subgroup_7_unclassified;Subgroup_7_unclassified
HWI-M02808_115_AHB9G_1_1105_12017_13738	597	0	0	14	90	43	0	20	0	1	0	38	30	13	8	16	66	11	24	0	0	63	6	127	5	0	0	0	0	0	1	0	0	0	0	0	0	0		Bacteria;Proteobacteria;Gammaproteobacteria;Xanthomonadales;Xanthomonadales_uncultured;uncultured_eubacterium_WD260;uncultured_eubacterium_WD260_unclassified
HWI-M02808_115_AHB9G_1_1111_20508_6245	596	1	0	0	3	10	0	0	0	0	0	10	10	0	0	3	0	0	0	0	0	0	0	0	0	0	0	0	0	6	472	0	9	0	0	0	0	0	Ground	Bacteria;Verrucomicrobia;Spartobacteria;Chthoniobacterales;DA101_soil_group;uncultured_Verrucomicrobia_bacterium;uncultured_Verrucomicrobia_bacterium_unclassified
HWI-M02808_115_AHB9G_1_1104_7632_6363	596	0	0	0	0	0	0	42	0	0	0	0	42	45	24	0	62	63	101	20	0	45	31	74	0	0	0	0	0	0	4	0	1	0	0	0	0	0	CASE_Unique	Bacteria;Proteobacteria;Alphaproteobacteria;Rhizobiales;1174-901-12;Beijerinckia_sp._Lor46;Beijerinckia_sp._Lor46_unclassified
HWI-M02808_115_AHB9G_1_1103_10215_4783	592	10	13	22	52	36	7	39	18	0	1	2	20	9	0	0	10	0	0	8	0	0	0	29	9	5	2	50	87	42	19	4	4	0	6	7	0	1		Bacteria;Verrucomicrobia;Opitutae;Opitutales;Opitutaceae;Opitutus;uncultured_bacterium
HWI-M02808_115_AHB9G_1_2101_15490_15173	590	3	0	0	5	35	33	91	0	0	47	0	24	0	0	13	0	0	0	0	0	0	0	0	7	0	0	0	0	0	9	0	0	0	268	0	0	1		Bacteria;Acidobacteria;Acidobacteria;Acidobacteriales;Acidobacteriaceae_(Subgroup_1);Acidobacteriaceae_(Subgroup_1)_uncultured;Acidobacteriaceae_(Subgroup_1)_unclassified
HWI-M02808_115_AHB9G_1_2105_16849_23590	589	0	0	4	0	114	2	0	0	0	0	0	0	0	0	27	0	0	0	0	0	0	0	0	0	0	0	52	210	0	137	0	0	0	0	0	0	0	Ground	Bacteria;Verrucomicrobia;OPB35_soil_group;OPB35_soil_group_unclassified;OPB35_soil_group_unclassified;OPB35_soil_group_unclassified;OPB35_soil_group_unclassified
HWI-M02808_115_AHB9G_1_1102_2810_15379	587	28	12	9	17	9	24	48	0	0	3	22	7	2	0	51	5	7	36	0	1	7	2	19	5	36	5	18	23	18	24	7	3	0	65	23	0	0		Bacteria;Acidobacteria;Acidobacteria;Acidobacteriales;Acidobacteriaceae_(Subgroup_1);Granulicella;Granulicella_unclassified
HWI-M02808_115_AHB9G_1_2101_4456_13471	586	0	0	0	0	0	0	0	0	0	0	0	0	0	0	0	0	0	2	0	0	0	0	0	0	0	29	0	0	0	0	148	78	72	0	0	0	255	Ground	Bacteria;Proteobacteria;Alphaproteobacteria;Rhizobiales;Xanthobacteraceae;Pseudolabrys;Pseudolabrys_unclassified
HWI-M02808_115_AHB9G_1_1102_23949_21336	586	80	8	12	0	82	25	28	0	0	23	0	48	17	0	0	4	0	26	13	0	0	0	0	0	0	0	0	0	0	33	80	0	0	0	0	0	0		Bacteria;Proteobacteria;Alphaproteobacteria;Rhizobiales;Xanthobacteraceae;Variibacter;uncultured_Hyphomicrobiaceae_bacterium
HWI-M02808_115_AHB9G_1_1101_15958_19747	584	44	0	0	20	67	0	0	0	0	0	0	0	0	0	0	0	1	0	0	0	0	0	0	0	15	0	93	49	54	0	68	0	21	109	31	0	10		Bacteria;Proteobacteria;Alphaproteobacteria;Rickettsiales;Mitochondria;Mitochondria_unclassified;Mitochondria_unclassified
HWI-M02808_115_AHB9G_1_1109_12719_6703	581	6	57	138	0	0	231	1	0	20	13	0	0	0	0	0	0	0	0	0	0	0	0	0	0	0	0	0	0	0	0	4	0	0	0	0	0	0		Bacteria;Actinobacteria;Actinobacteria;Frankiales;Acidothermaceae;Acidothermus;Acidothermus_unclassified
HWI-M02808_115_AHB9G_1_1112_2383_16220	580	0	0	0	0	0	0	0	0	0	0	0	0	0	0	0	0	0	0	0	0	0	0	0	0	31	52	59	1	31	0	20	88	35	0	104	114	7	Ground	Bacteria;Acidobacteria;Acidobacteria;Subgroup_6;Subgroup_6_unclassified;Subgroup_6_unclassified;Subgroup_6_unclassified
HWI-M02808_115_AHB9G_1_1103_12567_28762	579	76	3	0	0	0	0	15	0	0	0	23	43	15	4	3	17	0	58	17	25	62	13	26	0	2	0	43	28	40	33	0	0	0	0	0	0	0		Bacteria;Proteobacteria;Betaproteobacteria;Betaproteobacteria_unclassified;Betaproteobacteria_unclassified;Betaproteobacteria_unclassified;Betaproteobacteria_unclassified
HWI-M02808_115_AHB9G_1_1109_12244_20285	578	1	0	0	58	117	3	36	0	8	1	94	14	2	1	32	3	2	0	0	0	0	0	0	0	15	6	13	4	8	26	20	1	3	25	18	0	44		Bacteria;Acidobacteria;Acidobacteria;Subgroup_3;Unknown_Family;Bryobacter;Bryobacter_unclassified
HWI-M02808_115_AHB9G_1_1107_13683_6253	574	4	1	0	0	2	0	3	0	0	0	0	0	0	0	0	0	0	0	0	0	0	0	0	0	54	15	19	0	9	3	40	46	63	0	120	68	78	Ground	Bacteria;Proteobacteria;Alphaproteobacteria;Rhodospirillales;JG37-AG-20;uncultured_bacterium;uncultured_bacterium_unclassified
HWI-M02808_177_ANHM9_1_2112_13938_24275	570	0	0	0	0	0	0	0	0	0	0	0	0	0	0	0	0	348	221	0	0	0	0	0	0	0	0	0	0	0	0	0	0	0	0	0	0	0	CASE_Unique	Bacteria;Acidobacteria;Acidobacteria;Subgroup_4;Subgroup_4_uncultured;Subgroup_4_unclassified;Subgroup_4_unclassified
HWI-M02808_115_AHB9G_1_2109_19687_20005	568	0	0	0	0	8	0	0	0	0	0	1	8	8	0	0	19	0	242	5	0	0	5	166	0	0	0	85	0	0	8	0	0	0	0	0	0	0	CAAT_Inhibited	Bacteria;Bacteroidetes;Sphingobacteriia;Sphingobacteriales;Chitinophagaceae;Chitinophagaceae_unclassified;Chitinophagaceae_unclassified
HWI-M02808_115_AHB9G_1_2114_12091_28368	567	0	66	0	0	0	0	313	1	0	0	0	0	0	0	0	0	0	0	0	0	0	0	0	0	0	0	0	0	0	0	0	0	0	0	0	0	0		Bacteria;Actinobacteria;Thermoleophilia;Solirubrobacterales;Patulibacteraceae;Patulibacter;uncultured_bacterium
HWI-M02808_115_AHB9G_1_1103_16582_22597	567	0	14	40	22	24	45	33	0	74	44	26	0	18	0	66	0	0	0	0	0	0	0	0	29	18	0	0	0	0	0	0	0	0	8	0	0	0		Bacteria;Proteobacteria;Alphaproteobacteria;Rhizobiales;Bradyrhizobiaceae;Bradyrhizobium;Bradyrhizobium_unclassified
HWI-M02808_115_AHB9G_1_1101_6409_5020	567	93	0	0	39	0	0	0	0	3	8	0	0	0	0	0	0	0	0	0	0	0	0	0	0	0	0	64	0	0	0	85	0	0	0	95	50	68		Bacteria;Bacteroidetes;Sphingobacteriia;Sphingobacteriales;Chitinophagaceae;Chitinophagaceae_uncultured;Chitinophagaceae_unclassified
HWI-M02808_177_ANHM9_1_1110_18564_16718	565	0	16	145	2	5	9	0	33	85	1	9	0	0	0	9	0	0	0	0	0	0	0	0	1	1	0	12	5	17	3	6	0	0	153	0	0	2		Bacteria;Proteobacteria;Alphaproteobacteria;Rhizobiales;alphaI_cluster;uncultured_bacterium;uncultured_bacterium_unclassified
HWI-M02808_177_ANHM9_1_1101_28607_19031	565	0	3	12	43	48	11	16	0	17	23	32	59	20	4	47	20	15	63	6	0	17	0	69	6	9	0	3	0	0	0	3	0	0	2	0	0	0		Bacteria;Proteobacteria;Alphaproteobacteria;Rhizobiales;Rhizobiales_Incertae_Sedis;Rhizomicrobium;uncultured_bacterium
HWI-M02808_115_AHB9G_1_1109_8544_22650	565	13	20	0	0	100	0	19	0	0	21	0	0	0	0	0	0	34	33	6	0	0	1	7	0	40	4	3	4	6	47	0	0	0	121	0	0	0		Bacteria;Proteobacteria;Gammaproteobacteria;Xanthomonadales;Xanthomonadales_uncultured;uncultured_eubacterium_WD260;uncultured_eubacterium_WD260_unclassified
HWI-M02808_115_AHB9G_1_2112_24315_11777	564	0	0	1	2	1	2	0	0	0	0	0	28	0	0	0	0	0	0	0	0	0	0	0	0	5	4	84	0	21	0	6	73	172	1	13	129	22	Ground	Bacteria;Proteobacteria;Betaproteobacteria;Burkholderiales;Comamonadaceae;Comamonadaceae_unclassified;Comamonadaceae_unclassified
HWI-M02808_115_AHB9G_1_1101_18497_17697	564	0	0	1	0	65	0	0	0	0	1	197	0	0	0	43	0	0	0	0	0	0	0	0	28	0	24	0	0	0	0	95	43	18	0	0	7	0		Bacteria;Proteobacteria;Deltaproteobacteria;Myxococcales;BIrii41;BIrii41_unclassified;BIrii41_unclassified
HWI-M02808_115_AHB9G_1_2104_9663_13693	562	2	0	0	0	0	0	96	0	0	0	0	5	3	3	0	1	1	15	6	0	0	0	304	0	0	0	6	2	14	75	0	5	0	0	1	0	0		Bacteria;Proteobacteria;Alphaproteobacteria;Rhizobiales;Rhizobiales_unclassified;Rhizobiales_unclassified;Rhizobiales_unclassified
HWI-M02808_177_ANHM9_1_2102_23007_6860	560	0	0	0	0	0	0	0	0	0	0	0	0	0	0	0	0	0	0	0	0	0	0	0	0	41	9	21	0	4	0	12	55	37	0	158	103	91	Ground	Bacteria;Proteobacteria;Alphaproteobacteria;Rhizobiales;Xanthobacteraceae;Xanthobacteraceae_unclassified;Xanthobacteraceae_unclassified
HWI-M02808_115_AHB9G_1_1104_25418_24768	559	0	0	0	0	0	0	0	0	0	0	0	0	0	0	0	0	0	0	0	0	0	0	0	0	23	15	7	0	12	0	42	252	46	0	53	70	3	Ground	Bacteria;Firmicutes;Bacilli;Bacillales;Bacillaceae;Bacillus;Bacillus_unclassified
HWI-M02808_115_AHB9G_1_1101_18021_4038	558	94	0	0	6	8	0	50	0	0	0	6	19	30	12	10	10	1	40	0	11	36	12	87	0	3	0	35	0	0	7	17	0	4	0	22	0	10		Bacteria;Bacteroidetes;Sphingobacteriia;Sphingobacteriales;Chitinophagaceae;Parafilimonas;uncultured_bacterium
HWI-M02808_115_AHB9G_1_1108_23540_8354	557	4	0	0	0	0	0	1	0	0	0	2	60	16	10	2	28	2	93	28	0	87	12	110	0	0	0	34	11	17	17	0	0	0	0	0	0	0	CASE_Unique	Bacteria;Acidobacteria;Acidobacteria;Subgroup_3;Unknown_Family;Bryobacter;Bryobacter_unclassified
HWI-M02808_115_AHB9G_1_1101_6110_9644	555	7	0	0	12	15	0	37	0	0	0	7	36	12	19	2	38	1	25	20	0	12	3	58	0	37	1	55	11	21	36	23	3	14	0	0	20	10		Bacteria;Bacteroidetes;Sphingobacteriia;Sphingobacteriales;Chitinophagaceae;Chitinophagaceae_unclassified;Chitinophagaceae_unclassified
HWI-M02808_115_AHB9G_1_1103_22451_20383	555	17	0	2	7	76	5	24	0	0	7	30	64	21	12	16	10	0	77	20	19	13	11	21	8	0	0	6	0	17	28	0	0	0	0	0	0	0		Bacteria;Proteobacteria;Alphaproteobacteria;Rhizobiales;Bradyrhizobiaceae;Bradyrhizobiaceae_unclassified;Bradyrhizobiaceae_unclassified
HWI-M02808_115_AHB9G_1_1107_7525_6575	554	0	0	0	0	0	0	0	0	0	0	0	0	0	0	0	0	0	0	0	0	0	0	0	0	6	11	138	41	109	0	18	81	30	0	31	72	9	Ground	Bacteria;Proteobacteria;Gammaproteobacteria;Cellvibrionales;Halieaceae;Halieaceae_unclassified;Halieaceae_unclassified
HWI-M02808_177_ANHM9_1_1101_21564_13837	554	0	0	11	0	0	0	0	0	10	1	0	0	0	0	7	0	0	3	0	0	0	0	0	0	55	23	5	1	0	0	63	71	101	37	83	19	56	Ground	Bacteria;Proteobacteria;Alphaproteobacteria;Rhizobiales;Rhizobiales_unclassified;Rhizobiales_unclassified;Rhizobiales_unclassified
HWI-M02808_115_AHB9G_1_1101_17839_3352	553	0	0	0	0	0	0	0	0	0	0	0	0	0	0	0	0	0	0	0	0	0	0	0	0	196	0	44	0	0	0	0	0	0	0	128	185	0	Ground	Bacteria;Proteobacteria;Alphaproteobacteria;Rhizobiales;Xanthobacteraceae;Xanthobacteraceae_unclassified;Xanthobacteraceae_unclassified
HWI-M02808_115_AHB9G_1_1105_25946_13460	553	11	0	2	0	91	0	13	0	0	0	6	40	6	9	0	17	0	39	15	0	20	0	47	0	0	3	34	90	33	49	0	0	0	0	5	1	2		Bacteria;Acidobacteria;Acidobacteria;Subgroup_3;Unknown_Family;Bryobacter;Bryobacter_unclassified
HWI-M02808_115_AHB9G_1_1101_7680_7221	551	16	10	0	0	0	114	21	0	0	0	0	0	0	0	10	0	0	0	0	0	0	0	0	0	65	0	0	1	0	1	8	0	0	206	13	0	60		Bacteria;Acidobacteria;Acidobacteria;Subgroup_3;Unknown_Family;Bryobacter;Bryobacter_unclassified
HWI-M02808_115_AHB9G_1_1101_10059_11861	551	0	0	0	0	0	0	0	0	0	0	0	0	0	0	0	0	0	0	0	0	0	0	0	0	0	10	109	0	0	0	57	111	0	12	121	131	0	Ground	Bacteria;Verrucomicrobia;Spartobacteria;Chthoniobacterales;DA101_soil_group;uncultured_Verrucomicrobia_bacterium;uncultured_Verrucomicrobia_bacterium_unclassified
HWI-M02808_115_AHB9G_1_1103_9388_18073	550	34	3	4	8	50	3	42	0	3	0	26	10	1	0	25	11	0	29	1	0	0	0	49	2	32	0	25	44	17	33	6	13	3	8	21	18	19		Bacteria;Actinobacteria;Acidimicrobiia;Acidimicrobiales;Acidimicrobiales_uncultured;Acidimicrobiales_unclassified;Acidimicrobiales_unclassified
HWI-M02808_115_AHB9G_1_1103_13500_2436	550	26	8	0	21	0	2	39	0	0	0	8	76	4	0	12	51	5	80	24	0	0	10	40	1	10	0	0	14	9	56	0	12	0	0	6	0	3		Bacteria;Verrucomicrobia;Opitutae;Opitutales;Opitutaceae;Opitutus;Opitutus_unclassified
HWI-M02808_115_AHB9G_1_1101_11552_3726	549	109	0	0	5	16	0	7	0	0	0	24	33	0	5	1	3	0	7	4	2	0	0	1	4	59	0	1	30	12	142	0	0	0	0	0	48	0		Bacteria;Proteobacteria;Betaproteobacteria;Betaproteobacteria_unclassified;Betaproteobacteria_unclassified;Betaproteobacteria_unclassified;Betaproteobacteria_unclassified
HWI-M02808_115_AHB9G_1_1106_19970_3336	549	3	5	23	75	38	67	22	11	23	9	76	72	0	0	33	1	13	1	10	0	0	0	0	9	0	0	0	0	0	5	0	0	0	0	0	0	1		Bacteria;Planctomycetes;Phycisphaerae;WD2101_soil_group;uncultured_bacterium;uncultured_bacterium_unclassified;uncultured_bacterium_unclassified
HWI-M02808_115_AHB9G_1_1105_14457_14544	548	0	0	0	0	61	1	20	0	0	0	40	58	38	0	62	0	0	93	8	1	0	0	105	20	0	0	3	0	0	16	0	0	0	0	0	0	0		Bacteria;Verrucomicrobia;OPB35_soil_group;OPB35_soil_group_unclassified;OPB35_soil_group_unclassified;OPB35_soil_group_unclassified;OPB35_soil_group_unclassified
HWI-M02808_115_AHB9G_1_1101_20049_25233	548	0	0	0	0	0	0	0	0	0	0	0	0	0	0	0	0	0	0	0	0	0	0	0	0	105	0	0	0	0	0	178	0	162	0	0	0	103	Ground	Bacteria;Proteobacteria;Betaproteobacteria;Nitrosomonadales;Nitrosomonadaceae;Nitrosomonadaceae_uncultured;Nitrosomonadaceae_unclassified
HWI-M02808_177_ANHM9_1_1101_11347_5777	547	0	102	250	0	0	0	0	187	0	0	0	0	0	0	0	0	0	0	0	0	0	0	0	0	0	0	0	0	0	0	0	0	0	0	0	0	0		Bacteria;Planctomycetes;Phycisphaerae;WD2101_soil_group;uncultured_bacterium;uncultured_bacterium_unclassified;uncultured_bacterium_unclassified
HWI-M02808_115_AHB9G_1_1101_8340_6057	545	66	0	0	0	0	0	0	0	0	0	0	36	0	24	1	18	4	36	5	13	24	26	8	0	1	0	71	24	48	36	20	6	5	0	0	15	0	Ground	Bacteria;Proteobacteria;Alphaproteobacteria;Caulobacterales;Hyphomonadaceae;Hyphomonadaceae_unclassified;Hyphomonadaceae_unclassified
HWI-M02808_115_AHB9G_1_1101_16659_3368	544	0	0	0	0	0	0	0	0	0	0	0	0	0	0	0	0	0	0	0	0	0	0	0	0	122	0	40	22	0	0	40	49	20	0	53	32	159	Ground	Bacteria;Proteobacteria;Betaproteobacteria;Nitrosomonadales;Nitrosomonadaceae;Nitrosomonadaceae_uncultured;Nitrosomonadaceae_unclassified
HWI-M02808_115_AHB9G_1_2106_14446_16273	544	2	78	1	0	0	0	1	4	0	0	0	0	0	0	0	0	0	0	2	0	0	0	0	0	0	0	0	0	0	0	0	0	0	0	0	0	0		Bacteria;Actinobacteria;Thermoleophilia;Solirubrobacterales;YNPFFP1;YNPFFP1_unclassified;YNPFFP1_unclassified
HWI-M02808_177_ANHM9_1_2114_15627_11894	543	0	1	150	0	0	223	0	24	58	0	3	0	0	0	0	0	0	0	0	0	0	0	0	0	0	0	0	0	0	0	0	0	0	58	0	0	0		Bacteria;Acidobacteria;Acidobacteria;Acidobacteriales;Acidobacteriaceae_(Subgroup_1);Acidobacteriaceae_(Subgroup_1)_uncultured;Acidobacteriaceae_(Subgroup_1)_unclassified
HWI-M02808_115_AHB9G_1_1101_19675_6744	541	74	9	0	0	77	0	0	4	0	0	44	0	0	0	0	0	0	0	0	3	0	0	0	0	0	0	0	0	164	0	0	121	0	0	0	0	0		Bacteria;Acidobacteria;Acidobacteria;Subgroup_6;Subgroup_6_unclassified;Subgroup_6_unclassified;Subgroup_6_unclassified
HWI-M02808_115_AHB9G_1_1104_23991_16188	537	9	13	28	0	0	16	3	0	424	3	0	0	3	0	7	0	0	0	0	0	0	0	0	1	5	0	0	0	0	0	1	0	0	12	0	0	0		Bacteria;Acidobacteria;Acidobacteria;Subgroup_3;Unknown_Family;Candidatus_Solibacter;Candidatus_Solibacter_unclassified
HWI-M02808_115_AHB9G_1_1102_29374_14717	537	14	1	0	4	14	0	7	0	0	0	7	0	52	4	0	13	1	109	0	0	0	5	0	9	0	0	165	36	32	8	1	10	5	0	14	2	0	Ground	Bacteria;Proteobacteria;Deltaproteobacteria;Myxococcales;Haliangiaceae;Haliangium;uncultured_Myxococcales_bacterium
HWI-M02808_115_AHB9G_1_1101_25808_18550	536	0	0	0	0	0	0	0	0	0	0	0	0	0	0	0	0	0	0	0	0	0	0	0	0	26	7	3	0	0	0	22	22	43	275	25	1	111	Ground	Bacteria;Acidobacteria;Acidobacteria;Acidobacteriales;Acidobacteriaceae_(Subgroup_1);Acidobacteriaceae_(Subgroup_1)_uncultured;Acidobacteriaceae_(Subgroup_1)_unclassified
HWI-M02808_115_AHB9G_1_1102_11725_26515	534	14	0	0	0	0	0	12	0	6	0	23	48	7	10	92	30	13	45	0	0	16	15	45	8	13	0	56	14	13	37	0	0	0	0	0	0	0		Bacteria;Acidobacteria;Acidobacteria;Acidobacteriales;Acidobacteriaceae_(Subgroup_1);Acidobacteriaceae_(Subgroup_1)_uncultured;Acidobacteriaceae_(Subgroup_1)_unclassified
HWI-M02808_115_AHB9G_1_1110_23176_24482	533	11	69	20	0	19	0	26	31	4	18	29	4	0	0	0	0	0	0	0	0	0	0	0	7	25	6	0	0	0	10	0	0	0	30	0	0	12		Bacteria;WD272;uncultured_forest_soil_bacterium;uncultured_forest_soil_bacterium_unclassified;uncultured_forest_soil_bacterium_unclassified;uncultured_forest_soil_bacterium_unclassified;uncultured_forest_soil_bacterium_unclassified
HWI-M02808_177_ANHM9_1_1114_20009_21095	531	0	1	83	39	35	8	13	44	0	3	3	7	0	0	19	6	2	4	0	0	0	0	180	5	0	0	2	0	6	0	0	0	0	58	0	0	8		Bacteria;Bacteroidetes;Sphingobacteriia;Sphingobacteriales;Chitinophagaceae;Sediminibacterium;uncultured_Bacteroidetes_bacterium
HWI-M02808_115_AHB9G_1_2107_13391_19734	531	1	0	0	2	4	0	14	1	0	0	0	7	1	0	0	10	0	7	2	0	9	0	18	0	2	0	60	32	119	25	32	46	42	2	25	62	0		Bacteria;Proteobacteria;Betaproteobacteria;Burkholderiales;Comamonadaceae;Comamonadaceae_unclassified;Comamonadaceae_unclassified
HWI-M02808_177_ANHM9_1_1114_13564_8908	529	0	0	39	56	29	19	6	0	7	2	0	41	1	2	47	78	35	29	8	0	2	10	90	5	0	0	0	0	2	4	0	0	0	0	0	0	0		Bacteria;Acidobacteria;Acidobacteria;Acidobacteriales;Acidobacteriaceae_(Subgroup_1);Granulicella;Granulicella_unclassified
HWI-M02808_115_AHB9G_1_1104_17248_27628	529	6	12	0	0	0	0	0	0	0	0	2	0	0	0	4	0	1	0	0	0	0	0	0	0	38	15	63	29	21	8	79	18	13	78	77	12	23	Ground	Bacteria;Proteobacteria;Alphaproteobacteria;Rhizobiales;Rhizobiales_Incertae_Sedis;Rhizomicrobium;Rhizomicrobium_unclassified
HWI-M02808_177_ANHM9_1_1103_7919_13849	528	0	8	0	17	43	1	15	0	0	5	41	33	19	16	9	18	24	61	19	6	17	6	46	16	0	0	0	0	8	15	0	0	0	0	0	0	0		Bacteria;Actinobacteria;Thermoleophilia;Solirubrobacterales;Solirubrobacterales_unclassified;Solirubrobacterales_unclassified;Solirubrobacterales_unclassified
HWI-M02808_115_AHB9G_1_1101_18086_11616	527	82	0	0	0	9	0	5	0	0	0	17	47	7	11	0	21	4	23	16	30	27	21	9	1	6	0	10	30	28	20	0	9	0	0	2	1	0		Bacteria;Actinobacteria;Actinobacteria;Frankiales;Sporichthyaceae;Sporichthyaceae_uncultured;uncultured_bacterium
HWI-M02808_115_AHB9G_1_1102_25363_13798	527	38	43	0	0	2	0	77	64	0	0	0	0	0	0	0	0	0	0	0	0	0	1	0	0	20	0	0	10	0	0	0	0	0	0	0	0	0		Bacteria;Actinobacteria;Actinobacteria;Pseudonocardiales;Pseudonocardiaceae;Pseudonocardiaceae_unclassified;Pseudonocardiaceae_unclassified
HWI-M02808_115_AHB9G_1_1102_14472_15327	526	9	0	0	5	34	0	10	0	0	0	4	12	0	8	0	20	1	13	2	0	9	6	60	0	38	6	71	34	40	23	9	30	0	0	4	39	13		Bacteria;Verrucomicrobia;Spartobacteria;Chthoniobacterales;DA101_soil_group;DA101_soil_group_unclassified;DA101_soil_group_unclassified
HWI-M02808_115_AHB9G_1_1102_28466_16900	524	0	0	0	29	1	0	50	0	0	0	0	317	126	0	0	0	0	0	0	0	0	0	0	0	0	0	0	0	1	0	0	0	0	0	0	0	0		Bacteria;Cyanobacteria;Cyanobacteria;SubsectionIV;FamilyI;Nostoc;Nostoc_unclassified
HWI-M02808_177_ANHM9_1_1102_11950_5557	524	0	30	49	0	0	4	0	150	40	0	0	0	0	0	9	0	0	0	0	1	0	0	0	0	6	0	0	4	0	0	0	0	0	86	0	0	0		Bacteria;Actinobacteria;Thermoleophilia;Solirubrobacterales;YNPFFP1;uncultured_bacterium;uncultured_bacterium_unclassified
HWI-M02808_115_AHB9G_1_1101_11473_8172	523	0	0	0	0	14	0	1	0	0	0	328	0	0	0	0	0	0	0	0	0	9	0	0	0	2	0	3	0	10	7	0	26	63	4	0	54	0		Bacteria;Proteobacteria;Gammaproteobacteria;Xanthomonadales;Xanthomonadaceae;Stenotrophomonas;Stenotrophomonas_rhizophila
HWI-M02808_177_ANHM9_1_1112_21463_26959	523	0	3	25	45	17	16	16	0	0	14	36	10	15	4	20	12	7	16	8	7	30	13	81	15	0	0	7	0	0	6	0	0	0	6	0	3	0		Bacteria;Proteobacteria;Alphaproteobacteria;Rhodospirillales;Acetobacteraceae;Acetobacteraceae_uncultured;Acetobacteraceae_unclassified
HWI-M02808_115_AHB9G_1_1101_5475_15554	523	0	0	0	0	0	0	0	0	0	0	0	0	0	0	0	0	0	0	0	0	0	0	0	0	41	19	6	16	10	0	27	55	62	3	27	47	204	Ground	Bacteria;Acidobacteria;Holophagae;Subgroup_10;ABS-19;ABS-19_unclassified;ABS-19_unclassified
HWI-M02808_177_ANHM9_1_1104_9421_24963	523	0	0	37	81	65	34	39	5	29	14	49	19	18	0	8	0	14	0	5	0	0	0	0	0	0	0	0	0	0	16	0	1	8	35	3	0	10		Bacteria;Proteobacteria;Alphaproteobacteria;Caulobacterales;Caulobacteraceae;Caulobacteraceae_unclassified;Caulobacteraceae_unclassified
HWI-M02808_115_AHB9G_1_1108_18395_8390	523	0	0	0	29	10	0	37	0	0	0	3	32	9	5	0	47	6	59	20	1	0	7	147	0	0	0	8	16	26	4	0	1	5	0	1	0	0	CAAT_Inhibited	Bacteria;Verrucomicrobia;Opitutae;Opitutales;Opitutaceae;Opitutus;Opitutus_unclassified
HWI-M02808_177_ANHM9_1_2103_15095_17051	522	0	0	44	7	1	56	0	0	153	69	0	42	31	0	83	0	0	0	0	0	0	0	0	7	0	0	0	0	0	0	0	0	0	0	0	0	0		Bacteria;Proteobacteria;Gammaproteobacteria;Xanthomonadales;Xanthomonadaceae;Xanthomonadaceae_unclassified;Xanthomonadaceae_unclassified
HWI-M02808_115_AHB9G_1_1101_20011_7034	522	88	3	0	0	77	0	11	21	27	6	47	34	1	0	0	3	9	1	0	1	8	0	8	0	41	1	13	0	41	43	0	0	0	4	0	0	0		Bacteria;Acidobacteria;Acidobacteria;Subgroup_3;Unknown_Family;Bryobacter;Bryobacter_unclassified
HWI-M02808_115_AHB9G_1_1101_24253_8385	521	0	0	0	323	16	0	1	0	0	0	0	0	0	0	0	100	11	31	0	0	6	0	13	0	0	0	0	0	0	0	0	0	0	0	0	0	0		Bacteria;Cyanobacteria;Cyanobacteria;SubsectionIV;FamilyI;Nostoc;Nostoc_unclassified
HWI-M02808_115_AHB9G_1_1101_20392_7362	520	30	0	0	13	118	0	31	0	0	1	42	13	0	3	0	3	1	0	5	0	0	0	4	0	0	4	0	35	20	53	68	16	13	3	17	0	11		Bacteria;Planctomycetes;Phycisphaerae;WD2101_soil_group;uncultured_Planctomycetales_bacterium;uncultured_Planctomycetales_bacterium_unclassified;uncultured_Planctomycetales_bacterium_unclassified
HWI-M02808_115_AHB9G_1_1101_16949_25771	520	76	11	0	0	73	0	0	0	1	0	0	0	0	0	0	1	0	0	1	0	0	0	0	0	0	0	11	0	18	20	6	0	0	0	0	0	0		Bacteria;Bacteroidetes;Sphingobacteriia;Sphingobacteriales;Sphingobacteriaceae;Mucilaginibacter;Mucilaginibacter_unclassified
HWI-M02808_115_AHB9G_1_1113_12004_12713	520	0	2	122	0	0	20	0	10	92	0	0	0	12	0	160	0	23	0	0	0	2	0	0	0	5	0	11	0	0	0	0	6	6	5	4	3	7		Bacteria;Proteobacteria;Alphaproteobacteria;Rhizobiales;Rhizobiales_Incertae_Sedis;Rhizomicrobium;Rhizomicrobium_unclassified
HWI-M02808_115_AHB9G_1_1103_13589_1905	518	54	0	45	0	3	4	34	29	0	8	0	4	4	0	5	0	0	0	0	0	0	0	0	6	54	0	4	0	5	31	9	0	0	112	0	0	0		Bacteria;Acidobacteria;Acidobacteria;Acidobacteriales;Acidobacteriaceae_(Subgroup_1);Acidobacteriaceae_(Subgroup_1)_uncultured;Acidobacteriaceae_(Subgroup_1)_unclassified
HWI-M02808_115_AHB9G_1_1104_10306_9470	516	25	3	1	1	52	0	47	0	0	1	74	52	9	7	3	4	4	100	14	0	0	0	0	0	0	0	17	37	13	10	2	1	1	0	0	0	0		Bacteria;Gemmatimonadetes;Gemmatimonadetes;Gemmatimonadales;Gemmatimonadaceae;Gemmatimonas;Gemmatimonas_unclassified
HWI-M02808_115_AHB9G_1_2101_21251_12497	516	0	0	0	0	0	2	0	0	0	0	0	0	0	0	0	0	0	0	0	0	0	0	2	0	63	0	3	0	319	0	0	0	81	0	7	17	0	Ground	Bacteria;Cyanobacteria;Chloroplast;Oryza_sativa_Japonica_Group;Oryza_sativa_Japonica_Group_unclassified;Oryza_sativa_Japonica_Group_unclassified;Oryza_sativa_Japonica_Group_unclassified
HWI-M02808_115_AHB9G_1_1101_9187_23290	515	26	7	29	111	61	0	47	0	25	4	65	8	0	0	1	0	0	4	0	0	0	0	0	12	0	0	0	0	8	13	0	0	0	9	0	0	0		Bacteria;Bacteroidetes;Sphingobacteriia;Sphingobacteriales;Chitinophagaceae;Chitinophagaceae_unclassified;Chitinophagaceae_unclassified
HWI-M02808_115_AHB9G_1_1108_19949_6060	515	8	0	50	1	19	0	1	4	141	0	20	0	0	0	24	0	0	3	0	0	0	0	0	0	39	3	13	44	9	12	13	4	10	51	3	1	25		Bacteria;Verrucomicrobia;OPB35_soil_group;OPB35_soil_group_unclassified;OPB35_soil_group_unclassified;OPB35_soil_group_unclassified;OPB35_soil_group_unclassified
HWI-M02808_177_ANHM9_1_1103_8203_17171	515	0	0	0	0	0	0	0	0	0	0	0	0	0	0	0	2	0	0	0	0	2	0	0	0	38	7	13	0	2	0	1	31	32	0	50	325	8	Ground	Bacteria;Proteobacteria;Betaproteobacteria;Burkholderiales;Comamonadaceae;Comamonadaceae_unclassified;Comamonadaceae_unclassified
HWI-M02808_177_ANHM9_1_2113_25616_10203	514	0	0	0	0	0	0	0	0	0	0	0	0	0	0	0	0	0	0	0	0	0	0	0	0	0	6	73	51	89	0	63	32	8	0	114	38	25	Ground	Bacteria;Bacteroidetes;Sphingobacteriia;Sphingobacteriales;Sphingobacteriaceae;Sphingobacteriaceae_unclassified;Sphingobacteriaceae_unclassified
HWI-M02808_115_AHB9G_1_1106_20024_5820	514	18	117	84	0	0	2	9	125	13	27	0	0	0	0	1	0	0	0	0	0	0	0	0	2	9	0	0	6	0	0	2	0	0	8	0	0	0		Bacteria;Acidobacteria;Acidobacteria;Acidobacteriales;Acidobacteriaceae_(Subgroup_1);Acidobacteriaceae_(Subgroup_1)_uncultured;Acidobacteriaceae_(Subgroup_1)_unclassified
HWI-M02808_115_AHB9G_1_1102_19122_12152	514	12	23	153	10	0	57	31	9	167	9	0	1	0	0	0	8	4	0	0	0	0	0	0	7	0	0	1	0	0	0	0	0	0	13	0	0	0		Bacteria;Verrucomicrobia;Spartobacteria;Chthoniobacterales;Chthoniobacterales_unclassified;Chthoniobacterales_unclassified;Chthoniobacterales_unclassified
HWI-M02808_115_AHB9G_1_1101_4394_13799	513	0	0	0	5	0	0	6	0	0	0	0	0	0	13	4	25	0	6	0	0	285	6	154	0	0	0	0	0	0	0	0	0	0	0	0	0	0	CASE_Unique	Bacteria;Proteobacteria;Alphaproteobacteria;Rickettsiales;Mitochondria;Pleurozia_purpurea;Pleurozia_purpurea_unclassified
HWI-M02808_115_AHB9G_1_1106_7253_5346	510	12	14	1	16	18	1	10	0	0	7	28	16	15	13	14	2	15	34	20	0	2	0	8	16	7	7	17	0	20	13	13	3	6	9	13	0	12		Bacteria;Actinobacteria;Thermoleophilia;Gaiellales;Gaiellales_uncultured;Gaiellales_unclassified;Gaiellales_unclassified
HWI-M02808_115_AHB9G_1_1111_13359_10733	510	0	0	0	0	0	0	63	0	60	0	0	0	0	9	0	0	39	83	26	0	0	7	0	52	20	0	0	28	0	50	0	0	0	0	0	0	6		Bacteria;Proteobacteria;Alphaproteobacteria;Rhizobiales;alphaI_cluster;alphaI_cluster_unclassified;alphaI_cluster_unclassified
HWI-M02808_115_AHB9G_1_1108_23236_13795	510	13	7	37	15	0	7	1	3	61	14	28	1	2	7	17	0	0	14	1	0	0	0	0	7	0	0	7	1	3	0	1	0	0	4	0	0	0		Bacteria;Actinobacteria;Actinobacteria;Pseudonocardiales;Pseudonocardiaceae;Crossiella;uncultured_bacterium
HWI-M02808_177_ANHM9_1_1108_12439_12591	508	0	0	14	84	21	12	23	0	55	2	20	92	14	2	23	30	6	42	11	0	0	0	3	2	0	0	0	0	3	17	0	0	0	1	0	0	0		Bacteria;Acidobacteria;Acidobacteria;Acidobacteriales;Acidobacteriaceae_(Subgroup_1);Acidobacteriaceae_(Subgroup_1)_uncultured;Acidobacteriaceae_(Subgroup_1)_unclassified
HWI-M02808_115_AHB9G_1_1102_21260_16242	508	8	0	0	6	0	0	13	0	0	0	0	1	1	0	1	2	0	7	0	0	0	0	1	0	0	0	11	0	10	164	0	43	156	0	0	54	0	Ground	Bacteria;Proteobacteria;Betaproteobacteria;Hydrogenophilales;Hydrogenophilaceae;Ferritrophicum;uncultured_bacterium
HWI-M02808_115_AHB9G_1_1102_24036_25592	508	31	13	12	18	46	20	33	22	3	14	0	35	12	6	35	2	13	34	16	0	12	3	12	17	5	0	0	3	7	2	0	0	0	6	1	0	3		Bacteria;Proteobacteria;Alphaproteobacteria;Rhizobiales;Rhizobiales_unclassified;Rhizobiales_unclassified;Rhizobiales_unclassified
HWI-M02808_115_AHB9G_1_1109_10333_15912	508	0	0	0	0	0	0	3	0	0	0	0	17	0	12	0	41	3	0	0	4	36	20	22	0	2	0	30	217	34	13	0	4	22	0	1	4	0	CAAT_Inhibited	Bacteria;Bacteroidetes;Cytophagia;Cytophagales;Cytophagaceae;Chryseolinea;uncultured_bacterium
HWI-M02808_115_AHB9G_1_1101_18269_13536	507	0	0	57	0	0	50	0	13	171	2	2	12	5	0	156	0	4	0	0	0	0	0	0	6	0	0	0	0	0	5	0	0	0	3	0	0	0		Bacteria;Acidobacteria;Acidobacteria;Acidobacteriales;Acidobacteriaceae_(Subgroup_1);Acidobacteriaceae_(Subgroup_1)_uncultured;Acidobacteriaceae_(Subgroup_1)_unclassified
HWI-M02808_115_AHB9G_1_1113_16787_17278	507	0	0	0	0	8	0	9	0	0	0	0	31	11	8	12	16	1	131	25	4	80	14	115	1	0	0	9	1	3	5	0	0	0	0	0	0	0	CASE_Unique	Bacteria;Bacteroidetes;Sphingobacteriia;Sphingobacteriales;Chitinophagaceae;Chitinophagaceae_unclassified;Chitinophagaceae_unclassified
HWI-M02808_115_AHB9G_1_1103_5522_18962	507	38	3	0	10	71	0	46	0	0	0	15	25	10	14	18	0	0	46	14	0	0	0	15	0	0	0	73	0	0	18	0	0	0	0	0	0	0		Bacteria;Proteobacteria;Alphaproteobacteria;Rhizobiales;Bradyrhizobiaceae;Bradyrhizobiaceae_unclassified;Bradyrhizobiaceae_unclassified
HWI-M02808_115_AHB9G_1_2103_6736_25073	506	0	0	0	0	0	1	0	0	0	0	0	0	0	0	0	0	0	0	0	0	0	0	0	0	76	4	0	0	4	0	89	33	52	0	10	17	219	Ground	Bacteria;Bacteroidetes;Sphingobacteriia;Sphingobacteriales;Chitinophagaceae;Chitinophagaceae_unclassified;Chitinophagaceae_unclassified
HWI-M02808_115_AHB9G_1_1101_11750_8040	505	0	0	0	0	0	0	0	0	0	0	0	0	0	0	0	0	0	0	0	0	0	0	0	0	98	13	9	0	0	0	53	56	60	36	50	70	55	Ground	Bacteria;Planctomycetes;Planctomycetacia;Planctomycetales;Planctomycetaceae;Planctomyces;uncultured_Planctomyces_sp.
HWI-M02808_115_AHB9G_1_1105_12852_6886	505	0	0	155	0	0	0	0	23	317	0	0	0	0	0	0	0	0	0	0	0	0	0	0	0	0	2	0	0	0	0	0	0	6	0	0	0	0		Bacteria;Acidobacteria;Acidobacteria;Subgroup_3;Unknown_Family;Bryobacter;Bryobacter_unclassified
HWI-M02808_115_AHB9G_1_1102_29005_13133	503	20	0	0	37	37	1	98	0	0	0	3	2	0	0	0	2	0	1	0	0	0	1	0	3	53	11	3	13	47	16	71	0	14	2	32	0	24		Bacteria;Chloroflexi;Anaerolineae;Anaerolineales;Anaerolineaceae;Anaerolineaceae_uncultured;wastewater_metagenome
HWI-M02808_115_AHB9G_1_1105_10438_11113	502	0	0	0	0	0	0	0	0	0	0	0	22	12	29	5	39	0	89	28	17	0	18	0	1	0	11	17	72	41	49	7	0	0	0	3	0	0	CASE_Unique	Bacteria;Actinobacteria;Thermoleophilia;Solirubrobacterales;Solirubrobacteraceae;Solirubrobacter;Solirubrobacter_unclassified
HWI-M02808_115_AHB9G_1_1101_23017_11007	502	39	0	0	0	0	0	0	0	0	0	0	16	4	0	0	0	0	17	0	0	0	0	0	0	46	6	22	35	53	114	57	10	14	1	39	2	15		Bacteria;Verrucomicrobia;OPB35_soil_group;OPB35_soil_group_unclassified;OPB35_soil_group_unclassified;OPB35_soil_group_unclassified;OPB35_soil_group_unclassified
HWI-M02808_115_AHB9G_1_1102_10411_10002	499	25	0	11	0	84	0	62	0	0	6	0	25	23	0	14	0	8	0	0	0	0	0	0	19	50	0	0	0	0	54	0	0	0	8	0	47	0		Bacteria;Proteobacteria;Alphaproteobacteria;Caulobacterales;Caulobacteraceae;Phenylobacterium;Phenylobacterium_unclassified
HWI-M02808_177_ANHM9_1_1105_19241_3860	499	0	1	17	96	40	94	0	10	13	6	23	0	0	0	29	21	4	0	3	0	0	0	16	0	0	0	0	0	0	0	0	0	0	101	0	0	6		Bacteria;WD272;uncultured_Acidobacteria_bacterium;uncultured_Acidobacteria_bacterium_unclassified;uncultured_Acidobacteria_bacterium_unclassified;uncultured_Acidobacteria_bacterium_unclassified;uncultured_Acidobacteria_bacterium_unclassified
HWI-M02808_115_AHB9G_1_1111_26577_12503	498	0	0	105	0	0	78	0	11	42	0	0	0	0	0	0	0	7	0	0	0	0	0	0	0	29	4	0	0	0	0	36	0	29	0	49	59	17		Bacteria;Proteobacteria;Alphaproteobacteria;Rhizobiales;Rhizobiales_Incertae_Sedis;Rhizomicrobium;uncultured_alpha_proteobacterium
HWI-M02808_115_AHB9G_1_2105_23411_5537	498	0	0	0	0	0	0	21	0	0	0	5	20	1	18	0	42	0	34	5	9	2	0	22	1	6	12	55	44	40	45	18	15	9	0	23	16	6		Bacteria;Actinobacteria;Actinobacteria;Frankiales;Sporichthyaceae;Sporichthyaceae_uncultured;uncultured_bacterium
HWI-M02808_115_AHB9G_1_1102_19773_17519	498	24	5	0	0	15	0	235	1	0	0	4	1	0	0	0	12	3	0	0	2	0	0	4	0	59	3	17	32	4	3	31	0	7	0	0	0	4		Bacteria;Verrucomicrobia;Opitutae;Opitutales;Opitutaceae;Opitutus;Opitutus_unclassified
HWI-M02808_177_ANHM9_1_2101_10436_10320	498	0	1	220	0	0	155	0	6	0	0	0	0	1	0	104	0	0	0	0	0	0	0	0	3	0	0	0	0	0	0	0	0	0	0	0	0	4		Bacteria;Bacteroidetes;Sphingobacteriia;Sphingobacteriales;Sphingobacteriaceae;Mucilaginibacter;Mucilaginibacter_unclassified
HWI-M02808_115_AHB9G_1_1111_5835_9534	495	0	15	55	37	25	51	25	29	43	13	26	15	0	0	21	0	1	0	2	0	0	0	0	3	1	0	0	0	0	7	0	0	0	5	0	0	0		Bacteria;Planctomycetes;vadinHA49;vadinHA49_unclassified;vadinHA49_unclassified;vadinHA49_unclassified;vadinHA49_unclassified
HWI-M02808_115_AHB9G_1_1101_19253_8700	495	13	14	0	21	28	34	23	12	0	19	47	15	13	1	0	7	20	31	11	1	5	0	20	21	0	1	11	3	0	18	0	2	0	18	0	0	0		Bacteria;Actinobacteria;Actinobacteria;Frankiales;Frankiales_unclassified;Frankiales_unclassified;Frankiales_unclassified
HWI-M02808_115_AHB9G_1_1102_17112_25031	495	0	0	18	50	56	97	0	0	8	1	107	4	8	0	10	33	9	10	1	0	0	0	47	4	0	0	0	0	0	5	0	0	0	21	0	0	0		Bacteria;Bacteroidetes;Sphingobacteriia;Sphingobacteriales;Sphingobacteriaceae;Mucilaginibacter;Mucilaginibacter_unclassified
HWI-M02808_115_AHB9G_1_1102_15639_8367	493	0	0	0	0	0	0	0	0	0	0	27	0	0	0	0	0	0	0	0	0	0	0	0	0	162	0	18	26	0	0	130	0	39	0	33	1	56	Ground	Bacteria;Verrucomicrobia;OPB35_soil_group;bacterium_Ellin516;bacterium_Ellin516_unclassified;bacterium_Ellin516_unclassified;bacterium_Ellin516_unclassified
HWI-M02808_115_AHB9G_1_1105_22520_9447	492	0	0	0	57	47	46	6	0	0	56	69	22	19	0	0	5	25	9	0	0	0	0	24	27	0	0	1	0	0	0	0	2	0	0	0	0	0		Bacteria;Actinobacteria;Actinobacteria;Corynebacteriales;Mycobacteriaceae;Mycobacterium;Mycobacterium_unclassified
HWI-M02808_115_AHB9G_1_1102_10700_2473	491	46	0	0	28	0	1	3	0	0	1	0	28	0	0	21	17	0	56	11	8	5	7	22	0	0	0	38	0	77	48	6	0	0	0	11	19	0		Bacteria;Proteobacteria;Alphaproteobacteria;Rhizobiales;Rhizobiales_unclassified;Rhizobiales_unclassified;Rhizobiales_unclassified
HWI-M02808_115_AHB9G_1_1104_22074_13996	490	30	0	0	0	0	0	0	0	0	0	0	0	0	8	0	3	0	2	1	0	11	1	0	0	39	69	75	3	16	28	0	99	26	0	7	34	7	Ground	Bacteria;Proteobacteria;Deltaproteobacteria;Myxococcales;BIrii41;uncultured_proteobacterium;uncultured_proteobacterium_unclassified
HWI-M02808_115_AHB9G_1_1102_12469_13044	490	0	0	0	0	0	0	0	0	0	0	0	0	0	0	0	0	0	0	0	0	0	0	0	0	109	13	3	0	0	0	115	48	38	0	41	17	105	Ground	Bacteria;Acidobacteria;Acidobacteria;Acidobacteriales;Acidobacteriaceae_(Subgroup_1);Acidobacteriaceae_(Subgroup_1)_uncultured;Acidobacteriaceae_(Subgroup_1)_unclassified
HWI-M02808_115_AHB9G_1_1102_27392_21139	489	56	31	34	0	0	0	1	124	52	0	0	0	0	0	46	0	0	0	0	0	0	0	0	0	0	0	0	0	0	0	0	0	0	61	0	0	8		Bacteria;Verrucomicrobia;Opitutae;Opitutales;Opitutaceae;Opitutus;uncultured_bacterium
HWI-M02808_177_ANHM9_1_1105_10792_20526	488	0	14	18	48	0	18	4	2	30	15	6	15	23	0	49	6	7	32	27	0	0	1	0	16	0	0	15	0	0	43	0	2	1	0	2	6	0		Bacteria;Proteobacteria;Alphaproteobacteria;Caulobacterales;Caulobacteraceae;Caulobacteraceae_uncultured;Caulobacteraceae_unclassified
HWI-M02808_115_AHB9G_1_1101_22434_11168	488	0	0	27	12	87	2	123	0	12	0	0	78	14	0	45	0	16	0	0	0	0	0	0	0	0	0	0	0	0	0	0	0	0	40	0	0	0		Bacteria;Bacteroidetes;Sphingobacteriia;Sphingobacteriales;Sphingobacteriaceae;Mucilaginibacter;Mucilaginibacter_unclassified
HWI-M02808_115_AHB9G_1_2105_19455_16920	487	2	0	10	0	0	0	0	31	38	0	0	0	0	0	0	0	0	0	0	0	0	0	0	0	76	18	0	0	0	0	36	0	86	0	135	0	0		Bacteria;Proteobacteria;Alphaproteobacteria;Rhizobiales;Xanthobacteraceae;Variibacter;uncultured_forest_soil_bacterium
HWI-M02808_177_ANHM9_1_2112_16751_23089	487	0	1	15	0	0	0	10	3	0	0	1	0	0	0	6	9	1	2	4	0	0	0	0	0	36	9	18	9	17	17	20	20	12	4	158	30	30	Ground	Bacteria;Proteobacteria;Betaproteobacteria;Burkholderiales;Comamonadaceae;Comamonadaceae_unclassified;Comamonadaceae_unclassified
HWI-M02808_115_AHB9G_1_1108_5674_10752	487	24	9	19	5	42	19	0	6	39	12	14	0	0	0	57	0	0	0	0	0	0	0	0	65	11	0	0	0	7	0	0	0	2	16	0	0	0		Bacteria;Proteobacteria;Alphaproteobacteria;Rhizobiales;1174-901-12;1174-901-12_unclassified;1174-901-12_unclassified
HWI-M02808_115_AHB9G_1_1102_18204_23529	485	15	46	37	0	0	82	89	48	13	5	0	0	0	0	0	0	0	0	0	0	0	0	0	0	6	1	0	0	0	0	0	0	0	0	0	3	3		Bacteria;Verrucomicrobia;Spartobacteria;Chthoniobacterales;DA101_soil_group;uncultured_Verrucomicrobia_bacterium;uncultured_Verrucomicrobia_bacterium_unclassified
HWI-M02808_115_AHB9G_1_1101_23044_5102	485	230	0	0	0	12	0	2	0	0	0	0	25	0	6	0	1	0	43	0	1	7	11	5	0	0	0	47	10	24	30	0	0	0	0	0	0	0		Bacteria;Proteobacteria;Deltaproteobacteria;Myxococcales;Haliangiaceae;Haliangium;Haliangium_unclassified
HWI-M02808_115_AHB9G_1_1106_10203_12919	484	0	0	0	0	115	0	0	0	0	63	0	0	0	0	168	0	0	9	0	0	0	0	0	13	27	0	0	0	0	0	30	0	0	0	0	0	0		Bacteria;Chloroflexi;Ktedonobacteria;Ktedonobacterales;Thermosporotrichaceae;Thermosporotrichaceae_uncultured;Thermosporotrichaceae_unclassified
HWI-M02808_115_AHB9G_1_2106_10762_26399	484	7	6	0	9	17	0	21	3	4	12	25	26	0	6	17	28	32	25	6	3	3	8	12	14	20	0	3	9	11	17	5	0	0	18	1	0	5		Bacteria;Actinobacteria;Actinobacteria;Actinobacteria_unclassified;Actinobacteria_unclassified;Actinobacteria_unclassified;Actinobacteria_unclassified
HWI-M02808_115_AHB9G_1_1108_26629_23591	482	0	0	0	0	0	0	0	0	0	0	0	0	0	0	0	0	0	0	0	0	0	0	0	0	0	3	0	0	0	0	30	19	196	0	34	0	200	Ground	Bacteria;Acidobacteria;Acidobacteria;Subgroup_2;uncultured_Holophaga_sp.;uncultured_Holophaga_sp._unclassified;uncultured_Holophaga_sp._unclassified
HWI-M02808_177_ANHM9_1_2114_23385_19702	481	0	1	49	29	19	16	0	0	2	16	6	24	30	0	28	17	13	17	6	0	2	0	24	12	13	0	0	0	4	8	3	0	0	70	0	0	3		Bacteria;Proteobacteria;Alphaproteobacteria;Caulobacterales;Caulobacteraceae;Phenylobacterium;Phenylobacterium_unclassified
HWI-M02808_115_AHB9G_1_2103_19001_11433	481	0	29	42	0	0	85	5	47	78	49	0	0	1	0	51	0	1	4	2	0	0	0	0	0	0	0	3	0	0	6	0	0	0	0	0	0	0		Bacteria;Armatimonadetes;Armatimonadia;Armatimonadales;uncultured_Chloroflexi_bacterium;uncultured_Chloroflexi_bacterium_unclassified;uncultured_Chloroflexi_bacterium_unclassified
HWI-M02808_115_AHB9G_1_1104_25677_17283	481	4	0	0	0	0	0	0	0	0	0	23	0	0	1	0	1	0	0	1	0	0	0	0	0	7	0	8	4	159	46	3	175	0	3	10	1	26	Ground	Bacteria;Actinobacteria;Thermoleophilia;Solirubrobacterales;480-2;uncultured_bacterium;uncultured_bacterium_unclassified
HWI-M02808_177_ANHM9_1_1102_19106_17856	481	0	1	0	20	49	0	33	0	0	1	23	27	20	0	16	0	5	46	8	0	0	0	37	1	0	17	0	36	0	37	47	4	0	5	0	0	0		Bacteria;Proteobacteria;Deltaproteobacteria;Myxococcales;Myxococcales_unclassified;Myxococcales_unclassified;Myxococcales_unclassified
HWI-M02808_115_AHB9G_1_1106_23860_5654	481	0	0	0	0	0	0	0	0	0	0	0	0	0	0	0	0	0	0	0	0	0	0	0	0	9	12	25	0	9	0	8	27	62	0	115	66	140	Ground	Bacteria;Proteobacteria;Alphaproteobacteria;Rhizobiales;Xanthobacteraceae;Xanthobacteraceae_unclassified;Xanthobacteraceae_unclassified
HWI-M02808_115_AHB9G_1_1102_19775_27553	480	5	0	0	0	3	0	0	0	0	0	0	0	0	2	0	4	1	9	2	0	8	1	9	1	51	69	58	19	17	10	27	29	5	16	49	7	37	Ground	Bacteria;Proteobacteria;Gammaproteobacteria;Xanthomonadales;Xanthomonadaceae;Dokdonella;uncultured_Dokdonella_sp.
HWI-M02808_177_ANHM9_1_1101_13800_26151	480	0	11	0	0	31	0	0	0	0	7	0	0	0	0	0	0	0	0	0	0	0	0	0	0	4	0	0	0	0	0	1	0	3	307	0	0	48	Ground	Bacteria;Acidobacteria;Acidobacteria;Subgroup_3;Unknown_Family;Bryobacter;uncultured_Acidobacteria_bacterium
HWI-M02808_115_AHB9G_1_1105_12030_11780	478	10	13	55	0	0	70	0	36	55	12	0	0	9	0	31	0	0	0	0	0	0	0	0	0	0	0	5	0	0	3	22	0	0	88	0	0	0		Bacteria;Proteobacteria;Gammaproteobacteria;Xanthomonadales;Xanthomonadales_Incertae_Sedis;Acidibacter;Acidibacter_unclassified
HWI-M02808_115_AHB9G_1_1106_19089_8535	477	0	0	0	0	0	0	0	0	0	0	0	0	0	0	0	0	0	0	0	0	0	0	0	0	54	12	0	0	0	0	67	24	10	179	34	0	54	Ground	Bacteria;Proteobacteria;Alphaproteobacteria;Rhodospirillales;Acetobacteraceae;Acetobacteraceae_unclassified;Acetobacteraceae_unclassified
HWI-M02808_115_AHB9G_1_1105_15581_18653	475	0	12	0	0	0	0	0	0	0	38	0	0	0	0	0	0	0	0	0	0	0	0	0	0	0	96	0	0	0	0	87	0	0	37	106	0	0		Bacteria;Proteobacteria;Betaproteobacteria;Burkholderiales;Comamonadaceae;Comamonadaceae_unclassified;Comamonadaceae_unclassified
HWI-M02808_115_AHB9G_1_2113_10884_21871	474	3	0	1	19	6	0	12	0	1	4	0	35	13	8	11	36	0	35	10	0	18	11	170	18	0	0	4	6	12	3	0	0	0	0	0	3	0	CASE_Unique	Bacteria;Actinobacteria;Thermoleophilia;Solirubrobacterales;480-2;uncultured_bacterium;uncultured_bacterium_unclassified
HWI-M02808_115_AHB9G_1_1101_7530_14525	473	0	0	0	0	0	0	0	0	0	0	0	0	0	0	0	0	0	0	0	0	0	0	0	0	64	20	17	34	0	6	115	41	77	0	29	14	31	Ground	Bacteria;Bacteroidetes;Cytophagia;Cytophagales;Cytophagaceae;Cytophagaceae_uncultured;Cytophagaceae_unclassified
HWI-M02808_115_AHB9G_1_1114_21379_15928	473	14	20	16	4	18	7	10	15	43	9	57	4	0	0	0	0	0	0	0	0	0	0	0	5	46	7	0	6	0	18	28	5	4	38	2	3	21		Bacteria;Proteobacteria;Alphaproteobacteria;Rhodospirillales;Acetobacteraceae;Acetobacteraceae_uncultured;Acetobacteraceae_unclassified
HWI-M02808_115_AHB9G_1_1101_6551_22542	473	0	10	50	0	0	28	7	7	67	72	27	107	10	0	0	0	0	8	1	1	0	0	25	0	19	0	0	0	10	0	0	0	0	0	0	0	0		Bacteria;Acidobacteria;Acidobacteria;Acidobacteriales;Acidobacteriaceae_(Subgroup_1);Acidobacterium;Acidobacterium_unclassified
HWI-M02808_115_AHB9G_1_2103_21389_10764	473	0	0	5	232	25	5	0	0	0	0	26	17	1	0	11	5	32	5	0	1	11	1	72	1	0	0	0	0	0	0	0	0	0	0	0	0	0		Bacteria;Proteobacteria;Alphaproteobacteria;Rickettsiales;Mitochondria;Mitochondria_unclassified;Mitochondria_unclassified
HWI-M02808_177_ANHM9_1_2106_20945_18268	472	0	0	0	0	3	1	0	0	0	0	2	43	0	0	0	27	6	24	18	12	126	0	0	0	1	1	2	32	7	62	4	9	0	0	3	0	0	CAAT_Inhibited	Bacteria;Proteobacteria;Alphaproteobacteria;Sphingomonadales;Sphingomonadales_unclassified;Sphingomonadales_unclassified;Sphingomonadales_unclassified
HWI-M02808_115_AHB9G_1_1102_18739_17115	470	0	0	0	0	0	0	0	0	0	0	0	0	0	0	0	0	0	0	0	0	0	0	0	0	66	10	0	0	0	0	45	39	74	0	67	17	152	Ground	Bacteria;Acidobacteria;Acidobacteria;Acidobacteriales;Acidobacteriaceae_(Subgroup_1);Acidobacteriaceae_(Subgroup_1)_uncultured;uncultured_Acidobacteriaceae_bacterium
HWI-M02808_115_AHB9G_1_1102_3682_16219	469	34	0	26	0	14	11	0	12	13	0	0	0	0	0	3	2	0	3	0	0	0	0	0	1	23	2	36	13	31	0	26	22	43	35	26	19	66		Bacteria;Bacteroidetes;Bacteroidetes_unclassified;Bacteroidetes_unclassified;Bacteroidetes_unclassified;Bacteroidetes_unclassified;Bacteroidetes_unclassified
HWI-M02808_115_AHB9G_1_1108_3632_12408	468	9	3	46	15	8	0	22	0	40	0	19	29	34	2	87	7	14	0	5	0	1	3	2	30	0	0	0	0	0	10	0	0	0	8	0	0	0		Bacteria;Actinobacteria;Thermoleophilia;Solirubrobacterales;YNPFFP1;uncultured_bacterium;uncultured_bacterium_unclassified
HWI-M02808_115_AHB9G_1_1104_14450_5285	468	78	31	0	0	0	0	0	4	0	0	2	5	2	0	0	3	0	0	0	1	1	0	4	0	50	4	17	22	4	8	72	0	10	33	22	0	49		Bacteria;Proteobacteria;Alphaproteobacteria;Rhizobiales;Rhizobiales_Incertae_Sedis;Rhizomicrobium;Rhizomicrobium_unclassified
HWI-M02808_115_AHB9G_1_1101_9537_23357	468	0	0	0	0	0	0	0	0	0	0	0	0	0	0	0	0	0	0	0	0	0	0	0	0	92	21	17	0	0	0	51	34	60	0	121	66	0	Ground	Bacteria;Acidobacteria;Acidobacteria;Acidobacteriales;Acidobacteriaceae_(Subgroup_1);Acidobacteriaceae_(Subgroup_1)_uncultured;uncultured_Candidatus_Koribacter_sp.
HWI-M02808_115_AHB9G_1_1101_14449_20586	467	99	0	0	3	24	0	38	0	0	0	5	24	0	0	0	14	0	0	5	0	0	0	2	0	0	6	5	0	26	171	15	0	0	0	0	0	0		Bacteria;Planctomycetes;Phycisphaerae;WD2101_soil_group;uncultured_bacterium;uncultured_bacterium_unclassified;uncultured_bacterium_unclassified
HWI-M02808_115_AHB9G_1_1111_14658_24664	467	0	0	0	0	0	0	0	0	0	0	0	0	0	0	0	0	0	0	0	0	0	0	0	0	3	14	88	8	98	0	49	48	38	0	40	65	7	Ground	Bacteria;Acidobacteria;Acidobacteria;Subgroup_4;Subgroup_4_uncultured;Subgroup_4_unclassified;Subgroup_4_unclassified
HWI-M02808_115_AHB9G_1_1102_24602_22403	465	20	0	32	49	43	34	3	8	29	3	34	48	2	0	111	1	1	3	3	0	4	0	4	0	0	0	0	0	0	24	0	0	0	0	0	0	0		Bacteria;Verrucomicrobia;OPB35_soil_group;uncultured_bacterium;uncultured_bacterium_unclassified;uncultured_bacterium_unclassified;uncultured_bacterium_unclassified
HWI-M02808_115_AHB9G_1_1109_15326_17474	465	3	0	0	13	14	0	50	0	0	1	35	23	0	5	11	0	1	33	5	1	1	0	7	0	0	11	65	7	23	30	31	22	8	3	0	17	0		Bacteria;Proteobacteria;Deltaproteobacteria;Myxococcales;Sandaracinaceae;Sandaracinaceae_unclassified;Sandaracinaceae_unclassified
HWI-M02808_115_AHB9G_1_1105_9925_12382	464	0	0	0	0	0	0	0	0	0	0	0	6	5	4	7	5	0	20	7	31	268	50	13	0	0	0	0	0	0	0	0	0	0	0	0	0	0	CASE_Unique	Bacteria;Bacteroidetes;Sphingobacteriia;Sphingobacteriales;Chitinophagaceae;Chitinophagaceae_uncultured;uncultured_Chitinophaga_sp.
HWI-M02808_115_AHB9G_1_1104_15258_16012	463	0	0	0	122	48	56	1	0	0	43	53	7	8	0	56	0	6	0	2	0	0	0	1	9	0	0	1	1	1	0	23	0	0	0	0	0	0		Bacteria;Proteobacteria;Gammaproteobacteria;Xanthomonadales;Xanthomonadales_Incertae_Sedis;Acidibacter;Acidibacter_unclassified
HWI-M02808_115_AHB9G_1_1102_20487_15104	462	27	0	0	0	22	0	2	0	0	0	6	0	2	0	0	30	0	17	0	23	142	16	13	0	0	0	0	46	41	14	0	22	0	0	0	6	0	CAAT_Inhibited	Bacteria;Bacteroidetes;Sphingobacteriia;Sphingobacteriales;Chitinophagaceae;Flavitalea;uncultured_bacterium
HWI-M02808_115_AHB9G_1_1104_8972_22846	461	0	0	65	0	0	0	0	0	302	0	0	0	0	0	0	0	0	0	0	0	0	0	0	0	21	0	11	0	2	17	20	7	2	3	9	0	0		Bacteria;Verrucomicrobia;OPB35_soil_group;OPB35_soil_group_unclassified;OPB35_soil_group_unclassified;OPB35_soil_group_unclassified;OPB35_soil_group_unclassified
HWI-M02808_115_AHB9G_1_1101_13832_18393	461	0	0	0	0	0	0	0	0	0	0	0	0	0	0	0	0	0	0	0	0	0	0	0	0	26	3	5	0	0	0	149	12	54	0	74	61	77	Ground	Bacteria;Bacteroidetes;Sphingobacteriia;Sphingobacteriales;Chitinophagaceae;Chitinophagaceae_unclassified;Chitinophagaceae_unclassified
HWI-M02808_115_AHB9G_1_1106_20561_3155	460	0	0	9	226	78	25	0	0	0	0	44	15	6	0	7	0	4	0	2	0	0	0	0	3	0	3	11	0	0	22	1	0	0	0	0	0	0		Bacteria;Bacteria_unclassified;Bacteria_unclassified;Bacteria_unclassified;Bacteria_unclassified;Bacteria_unclassified;Bacteria_unclassified
HWI-M02808_115_AHB9G_1_1101_26251_22829	459	42	3	0	4	18	0	22	0	0	0	15	18	4	2	4	15	5	37	14	2	2	4	51	3	0	0	46	25	16	91	0	0	0	0	0	0	0		Bacteria;Proteobacteria;Betaproteobacteria;Betaproteobacteria_unclassified;Betaproteobacteria_unclassified;Betaproteobacteria_unclassified;Betaproteobacteria_unclassified
HWI-M02808_115_AHB9G_1_1102_12531_13793	459	78	1	0	0	16	0	20	0	0	0	26	0	0	0	0	2	0	48	0	1	0	0	9	0	0	11	3	5	17	18	1	29	20	10	66	47	11		Bacteria;Proteobacteria;Gammaproteobacteria;Xanthomonadales;Xanthomonadales_Incertae_Sedis;Acidibacter;uncultured_bacterium
HWI-M02808_177_ANHM9_1_1104_13368_13982	459	0	0	0	0	0	0	0	0	0	0	0	0	0	0	0	0	0	0	0	0	0	0	0	0	65	18	0	55	34	0	76	0	42	2	97	0	58	Ground	Bacteria;Acidobacteria;Acidobacteria;Subgroup_3;Unknown_Family;Candidatus_Solibacter;Candidatus_Solibacter_unclassified
HWI-M02808_115_AHB9G_1_1101_9098_15171	459	0	0	0	0	0	0	0	0	0	0	0	0	0	0	0	0	0	0	0	0	0	0	0	0	149	0	11	0	0	0	64	18	9	0	175	30	1	Ground	Bacteria;Verrucomicrobia;Spartobacteria;Chthoniobacterales;DA101_soil_group;DA101_soil_group_unclassified;DA101_soil_group_unclassified
HWI-M02808_115_AHB9G_1_2111_19449_26716	459	0	0	0	0	0	0	0	0	0	0	0	58	5	28	0	19	0	0	4	48	97	37	80	0	0	0	0	0	11	0	0	0	0	0	0	0	0	CASE_Unique	Bacteria;Verrucomicrobia;Opitutae;Opitutales;Opitutaceae;Opitutus;Opitutus_unclassified
HWI-M02808_177_ANHM9_1_2114_13081_12999	459	0	5	0	0	0	385	0	7	56	0	0	0	0	0	0	0	0	0	0	0	0	0	0	0	0	0	0	0	0	0	0	0	0	0	0	0	0		Bacteria;Acidobacteria;Acidobacteria;Subgroup_3;Unknown_Family;Bryobacter;Bryobacter_unclassified
HWI-M02808_115_AHB9G_1_1101_14978_21286	458	127	0	0	0	0	0	4	0	0	0	61	4	0	1	0	0	0	14	3	0	0	0	0	0	77	0	0	57	11	52	0	18	0	0	22	6	0		Bacteria;Proteobacteria;Alphaproteobacteria;Rhodospirillales;Rhodospirillaceae;Dongia;Dongia_unclassified
HWI-M02808_115_AHB9G_1_2102_22869_15747	458	3	0	0	1	0	0	3	0	0	0	0	22	18	20	5	22	4	18	24	44	110	74	36	0	0	0	0	0	6	0	0	0	1	0	0	0	0	CASE_Unique	Bacteria;Proteobacteria;Alphaproteobacteria;Rhodospirillales;Acetobacteraceae;Acetobacteraceae_unclassified;Acetobacteraceae_unclassified
HWI-M02808_115_AHB9G_1_1102_13224_16955	457	24	1	1	0	0	0	14	0	0	0	7	25	0	9	0	31	1	148	0	0	9	4	87	0	18	0	0	14	20	29	0	0	0	0	0	0	0		Bacteria;Actinobacteria;Actinobacteria;Micromonosporales;Micromonosporaceae;Micromonosporaceae_unclassified;Micromonosporaceae_unclassified
HWI-M02808_115_AHB9G_1_1107_27588_10767	456	7	0	0	0	0	0	3	0	1	0	0	0	0	0	2	0	0	2	0	0	0	0	14	0	53	5	19	12	31	37	43	15	30	16	69	43	44		Bacteria;Acidobacteria;Acidobacteria;Subgroup_3;Unknown_Family;Candidatus_Solibacter;Candidatus_Solibacter_usitatus_Ellin6076
HWI-M02808_115_AHB9G_1_1111_5043_10916	456	13	0	0	0	27	0	53	0	6	0	0	43	21	28	0	0	13	73	0	0	0	7	0	3	13	2	0	19	57	28	0	0	0	0	0	0	0		Bacteria;Proteobacteria;Alphaproteobacteria;Rhizobiales;Rhizobiales_Incertae_Sedis;Rhizomicrobium;Rhizomicrobium_unclassified
HWI-M02808_115_AHB9G_1_1109_21605_22685	456	0	0	13	95	54	29	0	0	13	2	65	41	5	0	49	9	6	30	3	0	0	0	5	3	0	0	0	0	0	3	0	0	0	0	0	0	0		Bacteria;Proteobacteria;Gammaproteobacteria;Xanthomonadales;Xanthomonadaceae;Rhodanobacter;Rhodanobacter_unclassified
HWI-M02808_177_ANHM9_1_1101_23411_14052	456	0	91	0	0	0	0	0	42	135	0	0	0	0	0	0	0	0	0	0	0	0	0	0	0	0	0	0	0	0	0	0	0	0	0	0	0	0		Bacteria;Acidobacteria;Acidobacteria;Acidobacteriales;Acidobacteriaceae_(Subgroup_1);Acidobacteriaceae_(Subgroup_1)_uncultured;Acidobacteriaceae_(Subgroup_1)_unclassified
HWI-M02808_115_AHB9G_1_1101_8077_6414	455	0	50	105	0	0	74	13	15	0	0	0	11	0	0	87	0	0	0	1	0	0	0	0	5	20	7	0	0	0	7	12	0	0	0	0	0	13		Bacteria;Verrucomicrobia;OPB35_soil_group;OPB35_soil_group_unclassified;OPB35_soil_group_unclassified;OPB35_soil_group_unclassified;OPB35_soil_group_unclassified
HWI-M02808_115_AHB9G_1_1110_24189_16982	454	18	0	0	0	20	21	0	0	1	0	0	0	0	5	0	59	55	32	3	0	16	5	133	6	0	0	0	0	0	53	0	0	20	0	0	0	0	CAAT_Inhibited	Bacteria;Bacteroidetes;Sphingobacteriia;Sphingobacteriales;Sphingobacteriaceae;Mucilaginibacter;uncultured_Mucilaginibacter_sp.
HWI-M02808_177_ANHM9_1_1102_8380_8574	454	0	10	45	13	43	10	30	33	11	16	19	15	11	6	41	16	11	19	17	0	0	0	18	11	0	0	0	0	1	10	0	0	0	0	0	0	0		Bacteria;Planctomycetes;Phycisphaerae;WD2101_soil_group;uncultured_bacterium;uncultured_bacterium_unclassified;uncultured_bacterium_unclassified
HWI-M02808_115_AHB9G_1_1102_16460_10256	453	16	0	0	1	3	3	3	0	0	0	7	8	2	0	0	14	1	19	0	0	1	0	2	0	23	11	29	42	34	46	19	35	19	0	36	19	24		Bacteria;Proteobacteria;Alphaproteobacteria;Rhizobiales;Bradyrhizobiaceae;Bradyrhizobium;uncultured_Rhizobiales_bacterium
HWI-M02808_177_ANHM9_1_1104_24409_13478	452	0	0	0	0	0	0	0	0	0	0	0	0	0	0	0	0	0	0	0	0	0	0	0	0	0	11	121	0	103	0	33	50	30	0	43	57	0	Ground	Bacteria;Bacteroidetes;Sphingobacteriia;Sphingobacteriales;Chitinophagaceae;Chitinophagaceae_unclassified;Chitinophagaceae_unclassified
HWI-M02808_115_AHB9G_1_2104_13666_19590	451	1	52	173	0	0	103	1	0	41	1	0	0	0	0	39	0	0	0	0	0	0	0	0	0	0	0	0	0	0	0	1	0	0	11	0	0	0		Bacteria;Acidobacteria;Acidobacteria;Subgroup_3;Unknown_Family;Bryobacter;uncultured_Holophaga_sp.
HWI-M02808_115_AHB9G_1_1101_20830_3445	451	346	0	0	0	56	0	0	0	1	0	0	8	0	0	0	0	0	0	0	0	0	0	0	0	0	0	0	0	0	16	0	0	0	0	0	0	0		Bacteria;Proteobacteria;Alphaproteobacteria;Rhizobiales;KF-JG30-B3;uncultured_bacterium;uncultured_bacterium_unclassified
HWI-M02808_115_AHB9G_1_1105_7981_14562	450	7	9	32	1	35	46	5	0	0	45	44	34	30	0	87	0	0	0	4	0	0	0	0	29	0	0	0	0	0	13	0	0	0	0	0	0	0		Bacteria;Actinobacteria;Actinobacteria;Frankiales;Acidothermaceae;Acidothermus;Acidothermus_unclassified
HWI-M02808_115_AHB9G_1_1101_4333_13131	449	0	0	0	0	0	0	0	0	0	0	0	0	0	0	0	0	0	0	0	0	0	0	0	0	174	14	48	5	5	6	39	0	5	36	58	3	41	Ground	Bacteria;Proteobacteria;Gammaproteobacteria;Xanthomonadales;Xanthomonadaceae;Dyella;Dyella_japonica
HWI-M02808_115_AHB9G_1_2102_13188_20016	448	1	0	51	0	0	26	22	0	1	8	0	0	0	0	0	0	0	0	0	0	0	0	0	0	39	12	0	0	0	2	2	5	10	223	0	0	18	Ground	Bacteria;Proteobacteria;Gammaproteobacteria;Xanthomonadales;Xanthomonadales_unclassified;Xanthomonadales_unclassified;Xanthomonadales_unclassified
HWI-M02808_115_AHB9G_1_1102_16988_18196	447	21	0	0	0	0	0	0	0	0	0	4	0	1	6	0	3	1	0	0	3	0	3	7	0	8	24	28	43	41	7	19	48	19	0	76	43	0	Ground	Bacteria;Actinobacteria;Thermoleophilia;Thermoleophilia_unclassified;Thermoleophilia_unclassified;Thermoleophilia_unclassified;Thermoleophilia_unclassified
HWI-M02808_115_AHB9G_1_1101_22236_11958	445	20	0	0	0	0	6	42	0	0	0	0	0	0	0	5	0	9	0	1	0	0	0	0	2	56	2	28	8	22	25	29	0	11	105	0	11	30		Bacteria;Verrucomicrobia;OPB35_soil_group;OPB35_soil_group_unclassified;OPB35_soil_group_unclassified;OPB35_soil_group_unclassified;OPB35_soil_group_unclassified
HWI-M02808_115_AHB9G_1_1101_19047_27843	445	10	0	9	14	6	7	3	0	13	0	13	8	0	0	31	9	0	22	6	2	3	2	12	3	15	0	33	41	51	23	50	5	0	45	0	1	0		Bacteria;Cyanobacteria;Chloroplast;Chloroplast_unclassified;Chloroplast_unclassified;Chloroplast_unclassified;Chloroplast_unclassified
HWI-M02808_115_AHB9G_1_1103_21273_8642	444	0	0	0	0	0	0	0	0	0	0	0	0	0	0	0	0	0	0	0	0	0	0	0	0	10	8	37	0	40	0	84	24	25	0	96	108	6	Ground	Bacteria;Bacteroidetes;Sphingobacteriia;Sphingobacteriales;Chitinophagaceae;Chitinophagaceae_unclassified;Chitinophagaceae_unclassified
HWI-M02808_115_AHB9G_1_1108_12319_21107	443	0	0	0	0	0	0	2	0	0	0	12	21	3	12	3	10	6	6	0	0	0	0	17	0	34	9	25	5	8	15	22	53	6	0	52	77	34		Bacteria;Proteobacteria;Alphaproteobacteria;Rhizobiales;Rhizobiales_unclassified;Rhizobiales_unclassified;Rhizobiales_unclassified
HWI-M02808_177_ANHM9_1_1102_4297_23061	443	0	0	0	0	0	0	0	0	0	0	0	27	0	1	0	12	0	10	2	1	6	1	79	6	0	1	22	208	27	35	0	0	0	0	0	0	0	CAAT_Inhibited	Bacteria;Bacteroidetes;Sphingobacteriia;Sphingobacteriales;Chitinophagaceae;Chitinophagaceae_unclassified;Chitinophagaceae_unclassified
HWI-M02808_115_AHB9G_1_1103_18504_13093	443	0	46	2	7	8	11	0	50	123	14	32	8	0	1	30	0	8	4	10	0	0	4	3	8	8	2	10	0	0	0	6	0	0	0	0	0	0		Bacteria;Proteobacteria;Alphaproteobacteria;Rhodospirillales;Acetobacteraceae;Acidisoma;uncultured_bacterium
HWI-M02808_115_AHB9G_1_1101_16626_12975	442	0	0	0	0	0	0	0	0	0	0	0	0	0	0	0	0	0	0	0	0	0	0	0	0	112	13	0	0	0	0	122	35	94	0	0	2	62	Ground	Bacteria;Proteobacteria;Betaproteobacteria;Nitrosomonadales;Nitrosomonadaceae;uncultured_alpha_proteobacterium;uncultured_alpha_proteobacterium_unclassified
HWI-M02808_115_AHB9G_1_1103_9399_20921	442	0	0	0	17	72	0	0	0	0	4	279	23	12	0	0	1	0	0	0	0	0	0	1	8	0	0	0	0	0	3	0	0	0	0	0	0	0		Bacteria;Verrucomicrobia;Opitutae;Opitutales;Opitutaceae;Opitutus;Opitutus_unclassified
HWI-M02808_177_ANHM9_1_1102_9914_12376	442	0	1	0	2	13	0	58	0	0	0	3	0	1	22	3	0	3	30	9	1	0	0	16	3	0	6	24	105	48	64	2	0	0	0	0	0	3		Bacteria;Chloroflexi;Anaerolineae;Anaerolineales;Anaerolineaceae;Anaerolineaceae_uncultured;uncultured_Gemmatimonadetes_bacterium
HWI-M02808_115_AHB9G_1_1110_13080_4339	441	6	0	1	0	23	5	0	0	0	9	41	42	28	9	7	26	8	70	27	8	12	22	6	16	0	0	3	1	0	4	0	0	0	0	0	0	0	CASE_Unique	Bacteria;Proteobacteria;Alphaproteobacteria;Rhizobiales;Rhizobiales_unclassified;Rhizobiales_unclassified;Rhizobiales_unclassified
HWI-M02808_115_AHB9G_1_1102_22412_13784	441	46	5	14	16	31	13	20	10	23	6	0	7	2	1	7	0	7	0	1	0	0	0	0	1	34	0	0	0	0	0	22	25	9	13	25	35	32		Bacteria;Proteobacteria;Alphaproteobacteria;Rhizobiales;Xanthobacteraceae;Xanthobacteraceae_unclassified;Xanthobacteraceae_unclassified
HWI-M02808_115_AHB9G_1_1101_14400_9235	441	71	0	0	0	11	0	31	0	0	0	0	36	0	0	33	4	0	44	0	0	0	0	0	1	9	5	4	33	14	51	12	23	7	0	9	9	5		Bacteria;Verrucomicrobia;Opitutae;Opitutales;Opitutaceae;Opitutus;Opitutus_unclassified
HWI-M02808_115_AHB9G_1_1101_16346_23126	441	5	0	9	12	13	29	19	5	37	6	60	35	4	0	31	5	0	25	5	0	8	1	55	4	0	0	0	11	4	19	0	0	0	10	0	0	0		Bacteria;Acidobacteria;Acidobacteria;Subgroup_3;Subgroup_3_unclassified;Subgroup_3_unclassified;Subgroup_3_unclassified
HWI-M02808_115_AHB9G_1_2109_22135_5242	440	0	7	32	2	0	142	8	2	23	8	3	11	8	0	80	0	5	0	0	0	0	0	0	11	3	0	0	0	0	13	0	0	0	26	0	0	2		Bacteria;Proteobacteria;Deltaproteobacteria;Myxococcales;Haliangiaceae;Haliangium;uncultured_delta_proteobacterium
HWI-M02808_115_AHB9G_1_2108_19436_15213	439	1	0	18	27	26	24	23	0	24	0	18	28	9	0	21	21	4	35	4	0	0	0	40	7	1	0	0	0	9	31	0	0	0	51	0	0	0		Bacteria;Acidobacteria;Acidobacteria;Acidobacteriales;Acidobacteriaceae_(Subgroup_1);Acidobacterium;Acidobacterium_unclassified
HWI-M02808_115_AHB9G_1_1110_24797_9817	439	13	21	104	0	0	0	0	25	39	0	0	0	0	0	73	0	0	0	0	0	0	0	0	0	12	0	0	6	0	10	11	0	1	62	0	0	1		Bacteria;Actinobacteria;Actinobacteria;Corynebacteriales;Mycobacteriaceae;Mycobacterium;Mycobacterium_unclassified
HWI-M02808_115_AHB9G_1_1103_16338_20801	439	0	0	0	0	0	0	0	0	0	0	0	0	0	0	0	0	0	0	0	0	0	0	0	0	30	26	90	0	5	0	6	136	15	0	75	49	1	Ground	Bacteria;Proteobacteria;Alphaproteobacteria;Rhodospirillales;Rhodospirillaceae;Dongia;Dongia_unclassified
HWI-M02808_115_AHB9G_1_1101_19739_10885	439	0	0	0	0	0	0	0	0	0	0	0	0	0	0	0	0	0	0	0	0	0	0	0	0	27	13	48	0	17	0	58	101	0	0	76	70	17	Ground	Bacteria;Proteobacteria;Gammaproteobacteria;KI89A_clade;KI89A_clade_unclassified;KI89A_clade_unclassified;KI89A_clade_unclassified
HWI-M02808_115_AHB9G_1_1110_9589_25510	436	3	3	49	0	0	41	0	2	12	2	0	0	8	0	0	12	6	8	0	3	77	7	26	0	9	2	0	12	0	80	0	2	5	30	0	0	1		Bacteria;Proteobacteria;Alphaproteobacteria;Rhizobiales;Rhizobiales_Incertae_Sedis;Rhizomicrobium;Rhizomicrobium_unclassified
HWI-M02808_115_AHB9G_1_1101_23841_16327	436	33	42	104	0	0	0	0	11	20	0	0	0	0	0	0	0	3	0	0	0	0	0	0	0	0	12	33	67	13	9	6	0	13	0	19	30	0		Bacteria;Bacteroidetes;Sphingobacteriia;Sphingobacteriales;Chitinophagaceae;Chitinophagaceae_unclassified;Chitinophagaceae_unclassified
HWI-M02808_177_ANHM9_1_2102_8439_20653	436	0	3	66	115	17	47	7	0	3	5	87	1	19	0	8	0	0	0	0	0	0	0	0	22	0	0	0	1	0	0	2	0	0	0	0	0	0		Bacteria;Acidobacteria;Acidobacteria;Subgroup_2;Subgroup_2_unclassified;Subgroup_2_unclassified;Subgroup_2_unclassified
HWI-M02808_115_AHB9G_1_1112_17340_17954	436	2	0	0	5	0	6	15	0	0	0	8	43	16	7	5	44	5	127	10	0	0	0	58	0	0	0	11	30	0	14	0	0	0	0	0	5	0		Bacteria;Acidobacteria;Acidobacteria;Subgroup_4;Unknown_Family;Blastocatella;Blastocatella_unclassified
HWI-M02808_115_AHB9G_1_1102_16250_15458	435	15	0	0	0	0	0	0	0	0	0	0	14	0	27	0	9	0	3	0	74	72	52	0	0	0	0	64	30	42	3	0	0	0	0	0	0	0	CAAT_Inhibited	Bacteria;Proteobacteria;Alphaproteobacteria;Rhizobiales;Hyphomicrobiaceae;Hyphomicrobiaceae_unclassified;Hyphomicrobiaceae_unclassified
HWI-M02808_177_ANHM9_1_1101_25038_13547	435	0	0	0	0	0	0	0	0	0	0	0	0	0	0	0	0	0	0	0	0	0	0	0	0	0	6	74	0	92	0	63	42	31	0	32	55	19		Bacteria;Proteobacteria;Gammaproteobacteria;Cellvibrionales;Halieaceae;Haliea;Haliea_unclassified
HWI-M02808_115_AHB9G_1_1102_28452_19119	435	0	0	0	0	0	0	0	0	0	0	0	0	0	0	0	0	0	0	0	0	0	0	0	0	25	31	5	0	0	0	172	53	25	0	68	56	0	Ground	Bacteria;Chloroflexi;Anaerolineae;Anaerolineales;Anaerolineaceae;Anaerolineaceae_uncultured;Anaerolineaceae_unclassified
HWI-M02808_115_AHB9G_1_1101_18683_20420	434	0	0	0	0	27	0	13	0	0	12	18	23	16	0	0	0	36	64	18	18	63	10	71	0	0	0	6	0	3	0	0	0	1	0	0	0	0	CASE_Unique	Bacteria;Proteobacteria;Alphaproteobacteria;Rhizobiales;Rhizobiales_unclassified;Rhizobiales_unclassified;Rhizobiales_unclassified
HWI-M02808_115_AHB9G_1_1112_5222_15812	433	0	0	0	0	8	0	0	0	0	0	0	0	0	0	0	0	0	0	0	81	268	66	0	0	0	0	0	0	0	0	0	0	0	0	0	0	0	CASE_Unique	Bacteria;Acidobacteria;Acidobacteria;Subgroup_4;Unknown_Family;Blastocatella;Blastocatella_unclassified
HWI-M02808_115_AHB9G_1_1101_22661_23312	432	19	0	0	32	0	13	0	0	0	1	50	0	0	0	190	0	0	0	0	0	0	0	0	8	0	0	40	24	0	0	0	0	3	0	0	0	0		Bacteria;Proteobacteria;Deltaproteobacteria;Myxococcales;Myxococcales_unclassified;Myxococcales_unclassified;Myxococcales_unclassified
HWI-M02808_115_AHB9G_1_1101_24082_14034	432	93	0	0	10	20	1	52	0	0	0	26	6	5	9	0	0	10	79	11	0	0	0	0	1	9	0	20	0	22	11	0	0	0	0	0	0	0		Bacteria;Proteobacteria;Betaproteobacteria;SC-I-84;SC-I-84_unclassified;SC-I-84_unclassified;SC-I-84_unclassified
HWI-M02808_115_AHB9G_1_1106_7934_7186	431	11	0	0	0	105	0	130	0	0	5	0	90	8	0	1	0	0	3	1	0	0	0	0	0	9	0	0	0	0	54	0	0	0	0	0	0	0		Bacteria;Verrucomicrobia;Spartobacteria;Chthoniobacterales;DA101_soil_group;uncultured_Verrucomicrobia_bacterium;uncultured_Verrucomicrobia_bacterium_unclassified
HWI-M02808_177_ANHM9_1_1102_12571_17947	431	0	0	0	0	0	0	4	0	0	0	0	0	0	0	0	0	0	0	0	0	0	0	0	0	10	9	36	3	133	0	71	27	31	0	51	38	16	Ground	Bacteria;Acidobacteria;Acidobacteria;Subgroup_3;Unknown_Family;Candidatus_Solibacter;uncultured_Acidobacteria_bacterium
HWI-M02808_115_AHB9G_1_1108_20820_22079	429	0	0	4	59	24	7	7	0	0	0	21	4	1	7	0	104	64	7	2	0	27	9	43	2	0	0	0	0	0	0	0	0	0	0	0	0	0		Bacteria;Proteobacteria;Alphaproteobacteria;Rhodospirillales;Acetobacteraceae;Acidiphilium;uncultured_soil_bacterium
HWI-M02808_115_AHB9G_1_1101_25655_5949	429	38	0	0	0	20	0	32	0	0	0	0	38	15	12	0	14	0	75	14	0	0	4	25	0	0	0	11	32	22	52	0	0	7	2	0	0	0		Bacteria;Acidobacteria;Acidobacteria;Acidobacteriales;Acidobacteriaceae_(Subgroup_1);Acidobacteriaceae_(Subgroup_1)_uncultured;uncultured_Acidobacteriaceae_bacterium
HWI-M02808_115_AHB9G_1_2104_26708_22595	429	1	0	23	64	0	4	15	0	0	4	5	9	3	0	29	9	14	0	9	0	0	0	0	0	34	0	9	11	9	19	8	0	15	11	0	23	58		Bacteria;Proteobacteria;Betaproteobacteria;Betaproteobacteria_unclassified;Betaproteobacteria_unclassified;Betaproteobacteria_unclassified;Betaproteobacteria_unclassified
HWI-M02808_115_AHB9G_1_1104_5262_21214	427	25	0	3	14	52	13	42	0	0	0	6	0	0	8	12	0	0	20	0	0	0	12	18	0	9	0	59	32	0	23	8	20	12	0	25	0	0		Bacteria;Verrucomicrobia;Spartobacteria;Chthoniobacterales;Chthoniobacteraceae;Chthoniobacter;uncultured_Verrucomicrobia_bacterium
HWI-M02808_115_AHB9G_1_2104_9892_23224	426	1	0	0	1	2	0	2	0	0	0	3	30	1	0	1	19	0	16	0	0	36	1	50	0	0	0	19	19	15	38	0	32	0	0	17	71	8	CAAT_Inhibited	Bacteria;Proteobacteria;Alphaproteobacteria;Rhizobiales;Rhizobiaceae;Rhizobiaceae_unclassified;Rhizobiaceae_unclassified
HWI-M02808_115_AHB9G_1_1113_16940_13238	426	0	0	0	0	0	1	1	0	0	0	0	0	0	0	0	0	0	0	0	0	2	0	0	0	4	24	71	9	14	16	14	30	22	8	20	34	134	Ground	Bacteria;Chlamydiae;Chlamydiae;Chlamydiales;Simkaniaceae;Candidatus_Rhabdochlamydia;Candidatus_Rhabdochlamydia_porcellionis
HWI-M02808_115_AHB9G_1_1106_12701_11092	425	1	0	0	0	0	0	0	0	0	0	0	0	0	0	0	0	0	2	0	0	0	5	0	0	51	15	23	107	65	0	69	11	21	0	0	21	16	Ground	Bacteria;Verrucomicrobia;Opitutae;Opitutales;Opitutaceae;Opitutus;uncultured_bacterium
HWI-M02808_115_AHB9G_1_1101_15267_7061	425	0	0	0	0	0	0	0	0	0	0	0	0	0	0	0	0	0	0	0	0	0	0	0	0	26	0	0	0	0	0	0	25	83	0	40	12	239	Ground	Bacteria;Acidobacteria;Acidobacteria;Subgroup_2;Subgroup_2_unclassified;Subgroup_2_unclassified;Subgroup_2_unclassified
HWI-M02808_177_ANHM9_1_2102_19630_16002	424	0	0	200	0	0	60	0	6	70	0	0	0	0	0	88	0	0	0	0	0	0	0	0	0	0	0	0	0	0	0	0	0	0	0	0	0	0		Bacteria;Acidobacteria;Acidobacteria;Subgroup_3;Unknown_Family;Bryobacter;Bryobacter_unclassified
HWI-M02808_115_AHB9G_1_1104_27465_17562	424	0	0	0	0	0	0	0	0	0	0	0	31	0	1	0	45	0	6	0	6	16	0	6	0	0	2	40	47	64	19	0	36	47	0	2	37	13		Bacteria;Bacteroidetes;Cytophagia;Cytophagales;Cytophagaceae;Cytophagaceae_uncultured;uncultured_bacterium
HWI-M02808_115_AHB9G_1_1101_29062_12063	424	23	0	0	0	3	0	0	0	0	0	29	26	1	18	0	12	2	4	5	1	0	14	8	0	0	3	12	23	39	154	0	0	0	0	0	10	4		Bacteria;Proteobacteria;Alphaproteobacteria;Rhodospirillales;MNC12;uncultured_bacterium;uncultured_bacterium_unclassified
HWI-M02808_115_AHB9G_1_1105_26138_8799	423	0	0	0	5	0	0	0	30	0	0	98	0	0	12	68	0	8	0	0	0	16	0	15	26	0	0	0	19	0	0	0	0	0	39	0	0	0		Bacteria;Proteobacteria;Alphaproteobacteria;Rhizobiales;Xanthobacteraceae;Variibacter;uncultured_Hyphomicrobiaceae_bacterium
HWI-M02808_115_AHB9G_1_1102_17889_12923	422	55	0	0	0	8	0	7	0	0	0	10	33	0	5	3	32	1	25	4	0	28	12	18	0	0	0	18	64	22	51	0	0	0	0	0	0	0		Bacteria;Bacteroidetes;Cytophagia;Cytophagales;Cytophagaceae;Cytophagaceae_uncultured;uncultured_Cyclobacteriaceae_bacterium
HWI-M02808_115_AHB9G_1_1106_10222_12309	421	5	32	56	102	39	128	0	0	2	1	6	0	0	0	11	0	0	0	0	0	0	0	0	6	0	0	0	0	0	0	0	0	0	11	0	0	0		Bacteria;Proteobacteria;Gammaproteobacteria;Xanthomonadales;Xanthomonadales_uncultured;Xanthomonadales_unclassified;Xanthomonadales_unclassified
HWI-M02808_177_ANHM9_1_1102_27238_8688	420	0	0	0	0	0	0	0	0	0	0	0	0	0	0	0	0	0	0	0	0	0	0	0	0	50	7	10	5	1	0	15	30	45	41	88	86	33		Bacteria;Proteobacteria;Alphaproteobacteria;Rhizobiales;Hyphomicrobiaceae;Hyphomicrobiaceae_unclassified;Hyphomicrobiaceae_unclassified
HWI-M02808_115_AHB9G_1_1101_12030_20196	420	0	0	0	8	120	0	0	0	1	1	15	0	0	0	0	0	0	0	0	0	0	0	204	0	0	0	4	0	15	0	0	0	0	0	0	0	0		Bacteria;Proteobacteria;Betaproteobacteria;Burkholderiales;Oxalobacteraceae;Janthinobacterium;Janthinobacterium_lividum
HWI-M02808_115_AHB9G_1_1101_18877_13493	420	0	0	0	0	0	0	0	0	0	0	0	0	0	0	0	0	0	0	0	0	0	0	0	0	56	10	13	0	0	0	45	17	63	0	122	20	73	Ground	Bacteria;Acidobacteria;Acidobacteria;Acidobacteriales;Acidobacteriaceae_(Subgroup_1);Acidobacteriaceae_(Subgroup_1)_uncultured;Acidobacteriaceae_(Subgroup_1)_unclassified
HWI-M02808_115_AHB9G_1_1101_25416_11237	420	12	0	0	15	61	5	27	0	0	6	14	51	0	0	12	26	16	0	0	3	0	0	95	10	0	0	0	0	3	12	0	5	1	4	0	0	0		Bacteria;Actinobacteria;Actinobacteria;Propionibacteriales;Nocardioidaceae;Nocardioides;uncultured_organism
HWI-M02808_115_AHB9G_1_1101_19104_9193	419	56	0	24	58	7	0	38	0	0	7	5	27	4	4	18	10	6	23	0	22	15	3	17	6	12	0	0	8	0	13	0	0	0	0	4	0	13		Bacteria;Verrucomicrobia;Opitutae;Opitutales;Opitutaceae;Opitutus;uncultured_bacterium
HWI-M02808_115_AHB9G_1_1103_20907_27542	419	0	0	0	34	11	1	0	0	63	0	0	38	7	14	18	45	1	66	8	1	0	0	57	0	0	0	13	3	5	13	0	0	0	0	0	0	0		Bacteria;Acidobacteria;Acidobacteria;Subgroup_3;Unknown_Family;Bryobacter;Bryobacter_unclassified
HWI-M02808_115_AHB9G_1_1105_3975_13113	418	46	0	0	0	0	0	1	0	0	0	0	30	0	8	0	7	2	55	9	10	36	14	11	0	11	0	28	63	29	27	0	0	0	0	12	0	0		Bacteria;Proteobacteria;Deltaproteobacteria;Myxococcales;BIrii41;uncultured_Sorangiineae_bacterium;uncultured_Sorangiineae_bacterium_unclassified
HWI-M02808_115_AHB9G_1_1110_11173_9456	418	5	0	0	0	0	0	0	0	0	0	0	0	0	0	0	0	0	0	0	0	4	0	0	0	20	13	64	22	74	5	32	28	36	3	73	8	10		Bacteria;Acidobacteria;Acidobacteria;Acidobacteriales;Acidobacteriaceae_(Subgroup_1);Edaphobacter;Edaphobacter_unclassified
HWI-M02808_115_AHB9G_1_1101_23933_13229	418	41	11	15	31	18	16	16	8	17	3	14	10	0	1	1	0	1	0	1	0	3	0	7	0	24	3	14	17	16	6	18	14	11	14	13	16	27		Bacteria;Planctomycetes;Planctomycetacia;Planctomycetales;Planctomycetaceae;Planctomyces;Planctomyces_unclassified
HWI-M02808_115_AHB9G_1_1102_16432_15034	418	0	0	0	0	0	0	0	0	0	0	0	0	0	0	0	0	0	0	0	0	0	0	0	0	95	15	0	0	0	0	93	22	80	0	26	6	77	Ground	Bacteria;Proteobacteria;Deltaproteobacteria;Myxococcales;Haliangiaceae;Haliangium;Haliangium_unclassified
HWI-M02808_115_AHB9G_1_2112_19970_3500	418	0	0	0	0	0	0	1	0	0	0	0	22	7	0	0	11	0	63	3	6	209	7	46	0	0	0	1	0	0	8	0	0	0	0	0	0	0	CASE_Unique	Bacteria;Verrucomicrobia;Spartobacteria;Chthoniobacterales;DA101_soil_group;uncultured_Verrucomicrobia_bacterium;uncultured_Verrucomicrobia_bacterium_unclassified
HWI-M02808_177_ANHM9_1_2105_16928_24333	417	0	0	0	0	0	0	0	0	0	0	0	0	0	0	0	0	0	0	0	0	0	0	0	0	3	0	0	0	0	0	0	0	0	405	0	0	8	GRFL_Unique	Bacteria;Proteobacteria;Alphaproteobacteria;Alphaproteobacteria_unclassified;Alphaproteobacteria_unclassified;Alphaproteobacteria_unclassified;Alphaproteobacteria_unclassified
HWI-M02808_115_AHB9G_1_1104_5470_14387	417	23	0	0	2	14	15	28	0	5	6	0	15	14	11	2	5	9	22	9	0	1	0	8	0	18	0	9	0	0	61	0	0	0	0	58	0	12		Bacteria;Actinobacteria;Thermoleophilia;Gaiellales;Gaiellales_unclassified;Gaiellales_unclassified;Gaiellales_unclassified
HWI-M02808_115_AHB9G_1_1101_24587_17468	417	277	0	0	0	0	0	0	0	0	0	0	53	0	0	0	4	0	0	0	0	0	62	0	0	0	0	0	3	0	4	0	9	0	0	1	0	0		Bacteria;Acidobacteria;Acidobacteria;Subgroup_4;Subgroup_4_uncultured;uncultured_bacterium;uncultured_bacterium_unclassified
HWI-M02808_115_AHB9G_1_1102_19217_19227	416	54	0	21	72	19	16	27	4	23	0	15	17	2	0	50	0	3	0	1	0	0	0	2	4	3	1	0	16	3	7	10	0	3	20	5	1	3		Bacteria;Acidobacteria;Acidobacteria;Subgroup_3;Unknown_Family;Candidatus_Solibacter;Candidatus_Solibacter_unclassified
HWI-M02808_115_AHB9G_1_1103_27488_13854	416	0	0	0	0	0	0	0	0	0	0	0	86	0	0	0	94	0	0	7	32	191	0	0	0	0	0	0	0	0	0	0	0	0	0	0	0	0	CASE_Unique	Bacteria;Verrucomicrobia;Spartobacteria;Chthoniobacterales;Chthoniobacteraceae;Chthoniobacter;uncultured_Verrucomicrobia_bacterium
HWI-M02808_177_ANHM9_1_2112_14345_11041	413	0	2	22	50	27	31	12	0	0	9	10	44	10	1	32	42	15	2	12	0	3	4	14	6	0	0	2	3	22	15	0	0	2	3	0	0	0		Bacteria;Acidobacteria;Acidobacteria;Acidobacteriales;Acidobacteriaceae_(Subgroup_1);Granulicella;Granulicella_unclassified
HWI-M02808_177_ANHM9_1_1107_14299_13113	413	0	0	1	0	0	1	0	10	29	0	0	0	0	0	9	0	0	0	0	0	0	0	0	0	52	0	0	0	0	0	97	6	50	18	49	2	85		Bacteria;Proteobacteria;Alphaproteobacteria;Rhizobiales;Rhizobiales_Incertae_Sedis;Rhizomicrobium;Rhizomicrobium_unclassified
HWI-M02808_115_AHB9G_1_1103_24102_8238	410	0	1	1	0	3	0	8	0	0	0	44	13	2	6	20	67	7	97	1	0	2	4	59	5	9	0	0	25	3	3	0	0	12	5	0	0	0		Bacteria;Bacteroidetes;Sphingobacteriia;Sphingobacteriales;Chitinophagaceae;Chitinophagaceae_uncultured;Chitinophagaceae_unclassified
HWI-M02808_115_AHB9G_1_1101_29635_15788	410	69	0	0	6	23	0	27	0	0	0	32	25	9	0	15	6	6	14	7	0	11	3	12	36	8	0	0	0	6	10	0	8	0	7	7	11	0		Bacteria;Gemmatimonadetes;Gemmatimonadetes;Gemmatimonadales;Gemmatimonadaceae;Gemmatimonas;uncultured_Gemmatimonadetes_bacterium
HWI-M02808_177_ANHM9_1_2103_22367_20978	407	0	4	46	76	0	78	0	0	0	10	32	0	20	0	0	9	8	9	0	0	0	0	11	7	4	0	1	0	0	8	0	0	0	49	0	0	5		Bacteria;Verrucomicrobia;Spartobacteria;Chthoniobacterales;Chthoniobacteraceae;Chthoniobacter;Chthoniobacter_unclassified
HWI-M02808_177_ANHM9_1_2103_16168_25761	407	0	0	0	0	0	0	0	0	0	0	0	0	0	0	0	0	0	0	0	0	0	0	0	0	0	5	7	0	0	0	0	26	362	0	0	0	0	GRFL_Unique	Bacteria;Proteobacteria;Alphaproteobacteria;Rickettsiales;Mitochondria;Mitochondria_unclassified;Mitochondria_unclassified
HWI-M02808_177_ANHM9_1_1101_21533_21931	407	0	0	0	0	0	0	0	0	0	0	0	0	0	0	0	0	0	0	0	0	0	0	0	0	72	1	4	0	0	0	74	41	38	0	23	0	154	Ground	Bacteria;Acidobacteria;Acidobacteria;Acidobacteriales;Acidobacteriaceae_(Subgroup_1);Acidobacteriaceae_(Subgroup_1)_uncultured;Acidobacteriaceae_(Subgroup_1)_unclassified
HWI-M02808_115_AHB9G_1_1102_10274_10968	406	0	1	0	1	0	0	0	0	0	0	41	0	0	0	0	0	0	1	0	0	0	0	0	0	76	3	20	0	1	0	58	49	44	0	37	12	62		Bacteria;Proteobacteria;Alphaproteobacteria;Rhizobiales;KF-JG30-B3;uncultured_bacterium;uncultured_bacterium_unclassified
HWI-M02808_177_ANHM9_1_1101_19516_16131	406	0	150	0	0	0	256	0	0	0	0	0	0	0	0	0	0	0	0	0	0	0	0	0	0	0	0	0	0	0	0	0	0	0	0	0	0	0		Bacteria;Verrucomicrobia;OPB35_soil_group;bacterium_enrichment_culture_clone_auto67_4W;bacterium_enrichment_culture_clone_auto67_4W_unclassified;bacterium_enrichment_culture_clone_auto67_4W_unclassified;bacterium_enrichment_culture_clone_auto67_4W_unclassified
HWI-M02808_115_AHB9G_1_1102_8532_18964	406	12	1	9	10	2	0	10	0	0	0	24	15	1	3	53	14	1	9	0	0	6	1	8	6	34	0	5	31	35	42	14	16	7	4	0	13	7		Bacteria;Bacteroidetes;Sphingobacteriia;Sphingobacteriales;Chitinophagaceae;Chitinophagaceae_uncultured;uncultured_bacterium_FukuN23
HWI-M02808_115_AHB9G_1_1104_15338_10016	405	19	0	0	0	0	0	0	0	0	0	0	0	0	0	2	0	0	0	0	0	0	0	0	0	12	0	26	329	0	3	3	0	0	0	0	11	0	Ground	Bacteria;Bacteroidetes;Sphingobacteriia;Sphingobacteriales;Chitinophagaceae;Ferruginibacter;Ferruginibacter_unclassified
HWI-M02808_115_AHB9G_1_1102_21628_20156	405	111	0	0	0	43	8	0	0	0	0	5	3	0	13	0	2	9	20	0	0	0	2	0	0	0	1	25	8	27	55	0	9	0	0	12	21	5		Bacteria;Proteobacteria;Alphaproteobacteria;Rhizobiales;Rhizobiales_Incertae_Sedis;Bauldia;uncultured_bacterium
HWI-M02808_115_AHB9G_1_1101_2505_16537	405	21	7	0	0	1	0	103	0	0	0	0	0	0	1	1	0	0	0	1	0	0	0	0	2	22	0	1	12	0	178	1	0	0	0	0	0	0		Bacteria;Chloroflexi;Anaerolineae;Anaerolineales;Anaerolineaceae;Anaerolineaceae_uncultured;uncultured_Gemmatimonadetes_bacterium
HWI-M02808_115_AHB9G_1_1103_3339_14409	405	21	15	1	0	0	6	0	7	0	0	0	0	0	0	0	0	0	0	0	5	2	0	0	1	24	16	0	3	0	0	12	76	23	15	18	74	49	Ground	Bacteria;Proteobacteria;Alphaproteobacteria;Caulobacterales;Caulobacteraceae;Phenylobacterium;uncultured_bacterium
HWI-M02808_115_AHB9G_1_1101_7090_11484	405	18	0	0	0	0	0	0	0	0	0	6	28	0	4	2	15	1	59	0	31	99	10	25	0	0	0	27	12	7	4	0	22	3	0	0	23	0		Bacteria;Chloroflexi;Chloroflexi_uncultured;Chloroflexi_unclassified;Chloroflexi_unclassified;Chloroflexi_unclassified;Chloroflexi_unclassified
HWI-M02808_115_AHB9G_1_1105_7050_24783	404	2	9	12	33	0	0	4	11	21	4	0	2	0	1	9	0	0	2	0	0	0	0	1	1	2	0	1	0	4	5	0	0	2	137	0	0	79	Ground	Bacteria;Proteobacteria;Gammaproteobacteria;Xanthomonadales;Xanthomonadales_Incertae_Sedis;Acidibacter;uncultured_bacterium
HWI-M02808_115_AHB9G_1_1108_19447_2371	404	15	78	0	0	0	1	5	7	18	17	0	0	15	0	1	0	0	0	0	0	0	0	0	0	3	0	0	0	0	0	0	0	0	154	0	0	0		Bacteria;WD272;uncultured_forest_soil_bacterium;uncultured_forest_soil_bacterium_unclassified;uncultured_forest_soil_bacterium_unclassified;uncultured_forest_soil_bacterium_unclassified;uncultured_forest_soil_bacterium_unclassified
HWI-M02808_115_AHB9G_1_2109_13053_2486	404	0	0	0	1	2	0	13	0	0	0	0	47	0	9	4	80	4	79	6	2	53	9	29	0	0	1	8	5	12	27	1	0	5	0	0	0	0		Bacteria;Chloroflexi;Anaerolineae;Anaerolineales;Anaerolineaceae;Anaerolineaceae_uncultured;wastewater_metagenome
HWI-M02808_115_AHB9G_1_1103_16369_10625	403	14	0	0	0	3	0	1	0	0	0	0	6	0	4	1	0	0	11	4	1	0	6	0	0	38	11	23	7	7	0	53	48	22	0	77	43	0		Bacteria;Proteobacteria;Alphaproteobacteria;Caulobacterales;Hyphomonadaceae;Woodsholea;uncultured_alpha_proteobacterium
HWI-M02808_115_AHB9G_1_2114_21492_4482	403	1	0	0	0	0	0	0	0	0	0	0	3	0	4	4	10	0	7	6	0	0	7	4	0	0	11	71	60	0	12	49	47	0	0	0	95	0		Bacteria;Acidobacteria;Acidobacteria;Subgroup_4;Subgroup_4_uncultured;Subgroup_4_unclassified;Subgroup_4_unclassified
HWI-M02808_177_ANHM9_1_1113_13194_20348	402	0	0	0	0	0	0	0	0	0	0	0	0	0	0	0	0	0	0	0	0	0	0	0	0	0	2	316	0	49	0	0	8	0	0	4	16	0	Ground	Bacteria;Proteobacteria;Alphaproteobacteria;Sphingomonadales;Erythrobacteraceae;Altererythrobacter;Altererythrobacter_unclassified
HWI-M02808_115_AHB9G_1_1101_18718_26220	401	11	16	87	0	0	0	0	73	19	0	0	0	0	0	0	0	0	0	0	0	2	0	0	0	0	4	0	0	7	0	0	9	0	0	0	0	112		Bacteria;Actinobacteria;Actinobacteria;Streptomycetales;Streptomycetaceae;Streptomycetaceae_unclassified;Streptomycetaceae_unclassified
HWI-M02808_115_AHB9G_1_1101_10975_7927	400	0	0	0	0	0	0	0	0	0	0	0	0	0	0	0	0	0	0	0	0	0	0	0	0	0	0	0	0	0	0	0	0	0	0	400	0	0		Bacteria;Firmicutes;Bacilli;Bacillales;Alicyclobacillaceae;Tumebacillus;uncultured_bacterium
HWI-M02808_115_AHB9G_1_2101_4109_7898	399	0	0	0	0	0	0	0	0	0	0	0	0	0	0	0	0	0	0	0	0	0	0	0	0	5	15	174	62	23	0	32	9	22	0	7	2	0	Ground	Bacteria;Bacteroidetes;Cytophagia;Cytophagales;Cytophagaceae;Cytophagaceae_uncultured;uncultured_bacterium
HWI-M02808_115_AHB9G_1_1103_14133_6469	399	22	0	0	0	51	0	24	41	0	0	0	0	0	0	0	0	0	0	3	0	0	0	0	0	54	16	0	0	0	0	27	12	11	48	10	8	0		Bacteria;Acidobacteria;Acidobacteria;Subgroup_6;Subgroup_6_unclassified;Subgroup_6_unclassified;Subgroup_6_unclassified
HWI-M02808_115_AHB9G_1_1106_21121_15184	399	0	0	0	0	0	0	0	0	0	0	0	8	0	0	0	0	0	0	0	0	0	0	0	0	150	7	0	0	0	0	208	0	23	0	0	3	0	Ground	Bacteria;Verrucomicrobia;Opitutae;Opitutales;Opitutaceae;Opitutus;Opitutus_unclassified
HWI-M02808_115_AHB9G_1_1102_9495_9558	398	0	0	0	0	0	0	0	0	0	0	0	0	0	0	0	0	0	0	0	0	0	0	0	0	35	4	1	0	0	0	48	16	62	0	10	0	222	Ground	Bacteria;Acidobacteria;Acidobacteria;Acidobacteriales;Acidobacteriaceae_(Subgroup_1);Acidobacteriaceae_(Subgroup_1)_uncultured;Acidobacteriaceae_(Subgroup_1)_unclassified
HWI-M02808_115_AHB9G_1_1102_11734_24850	398	8	2	0	43	62	1	41	0	2	4	40	24	0	2	8	10	5	22	5	3	9	0	23	9	17	0	0	0	1	8	4	0	0	11	0	0	4		Bacteria;Proteobacteria;Betaproteobacteria;SC-I-84;SC-I-84_unclassified;SC-I-84_unclassified;SC-I-84_unclassified
HWI-M02808_177_ANHM9_1_1105_10280_4803	396	0	0	58	38	9	29	4	4	149	14	16	4	9	0	21	0	0	0	0	0	0	0	0	4	0	0	0	0	0	0	0	0	0	4	0	0	0		Bacteria;Actinobacteria;Actinobacteria;Frankiales;Acidothermaceae;Acidothermus;uncultured_soil_bacterium
HWI-M02808_177_ANHM9_1_1110_17669_25552	396	0	0	0	0	0	2	6	0	0	0	0	1	3	0	21	116	2	12	0	0	0	0	2	4	17	0	4	28	0	2	6	0	6	13	123	26	0	CAAT_Inhibited	Bacteria;Actinobacteria;Actinobacteria;Streptomycetales;Streptomycetaceae;Streptomycetaceae_unclassified;Streptomycetaceae_unclassified
HWI-M02808_115_AHB9G_1_1103_7300_7655	395	15	9	12	0	0	20	9	8	13	18	14	16	22	5	75	9	9	24	10	0	2	0	17	28	0	0	0	0	0	10	0	0	0	6	0	0	0		Bacteria;Proteobacteria;Alphaproteobacteria;Rhizobiales;Hyphomicrobiaceae;Devosia;Devosia_unclassified
HWI-M02808_115_AHB9G_1_1114_19679_5711	395	8	10	8	0	0	19	0	68	152	8	0	0	0	0	5	0	0	0	0	0	0	0	0	0	0	0	0	0	0	0	0	0	0	0	0	0	0		Bacteria;Actinobacteria;Thermoleophilia;Solirubrobacterales;Conexibacteraceae;Conexibacter;uncultured_bacterium
HWI-M02808_115_AHB9G_1_1110_20313_4033	394	0	0	0	0	4	0	0	0	0	0	0	6	0	7	0	12	0	12	0	5	0	0	3	0	6	0	17	75	64	23	2	49	8	0	46	44	8		Bacteria;Proteobacteria;Gammaproteobacteria;Xanthomonadales;Xanthomonadales_Incertae_Sedis;Acidibacter;uncultured_bacterium
HWI-M02808_115_AHB9G_1_1104_12791_8981	394	38	0	16	11	33	9	33	0	0	0	20	19	13	5	16	0	4	0	0	0	0	0	25	9	0	0	0	38	31	37	0	0	0	0	0	0	0		Bacteria;Proteobacteria;Alphaproteobacteria;Rhizobiales;Bradyrhizobiaceae;Bradyrhizobiaceae_unclassified;Bradyrhizobiaceae_unclassified
HWI-M02808_115_AHB9G_1_1101_23671_7302	393	0	5	19	41	0	62	0	7	77	11	34	4	3	0	13	0	4	0	1	0	0	0	0	15	9	2	2	0	4	19	10	1	0	13	0	0	5		Bacteria;Acidobacteria;Acidobacteria;Acidobacteriales;Acidobacteriaceae_(Subgroup_1);Acidobacteriaceae_(Subgroup_1)_uncultured;Acidobacteriaceae_(Subgroup_1)_unclassified
HWI-M02808_115_AHB9G_1_2109_20561_3189	392	0	0	0	75	0	0	9	0	0	0	38	52	0	0	18	39	12	0	0	6	32	0	70	0	0	0	7	1	7	0	0	0	0	0	0	0	0		Bacteria;Cyanobacteria;Chloroplast;Chloroplast_unclassified;Chloroplast_unclassified;Chloroplast_unclassified;Chloroplast_unclassified
HWI-M02808_115_AHB9G_1_1101_25255_11767	390	0	0	0	0	0	0	0	0	0	0	0	0	0	0	0	4	0	0	0	0	3	0	0	0	30	10	0	19	3	0	79	19	32	0	39	8	135	Ground	Bacteria;Proteobacteria;Alphaproteobacteria;Rhizobiales;Bradyrhizobiaceae;Bradyrhizobiaceae_unclassified;Bradyrhizobiaceae_unclassified
HWI-M02808_115_AHB9G_1_1113_24122_7559	389	3	0	9	13	14	24	7	1	2	1	5	0	0	0	49	0	0	11	0	0	0	0	0	0	25	1	9	7	0	110	32	5	3	12	8	9	22		Bacteria;Acidobacteria;Acidobacteria;Subgroup_3;Subgroup_3_unclassified;Subgroup_3_unclassified;Subgroup_3_unclassified
HWI-M02808_177_ANHM9_1_1108_11065_17923	389	0	2	48	0	0	0	0	137	154	10	0	0	0	0	0	0	0	0	0	0	0	0	0	0	0	0	0	0	0	0	0	0	0	0	0	0	0		Bacteria;Actinobacteria;Actinobacteria;Pseudonocardiales;Pseudonocardiaceae;Goodfellowiella;Goodfellowiella_coeruleoviolacea
HWI-M02808_177_ANHM9_1_1104_7584_13679	387	0	0	0	0	0	0	0	0	0	0	0	0	0	0	0	0	0	0	0	0	0	0	0	0	76	18	22	25	0	0	87	17	17	32	18	0	39		Bacteria;Nitrospirae;Nitrospira;Nitrospirales;4-29;uncultured_bacterium;uncultured_bacterium_unclassified
HWI-M02808_115_AHB9G_1_1104_23607_4095	387	3	10	50	56	7	23	153	8	6	6	13	0	0	0	10	2	4	1	0	0	0	0	0	0	8	0	0	3	0	5	2	0	0	2	0	0	0		Bacteria;Acidobacteria;Acidobacteria;Subgroup_3;Unknown_Family;Candidatus_Solibacter;uncultured_bacterium
HWI-M02808_115_AHB9G_1_1102_23910_9858	387	0	0	0	0	21	2	0	0	0	0	0	13	0	0	0	4	0	5	0	0	2	0	230	0	0	0	0	0	0	0	0	5	21	0	0	55	4	CAAT_Inhibited	Bacteria;Proteobacteria;Gammaproteobacteria;Pseudomonadales;Pseudomonadaceae;Pseudomonas;Pseudomonas_unclassified
HWI-M02808_115_AHB9G_1_2109_7213_12902	387	3	3	0	0	0	0	29	0	0	0	0	38	32	0	0	23	54	43	28	1	0	5	29	0	2	2	15	7	0	16	0	0	0	0	0	0	0	CASE_Unique	Bacteria;WD272;uncultured_bacterium;uncultured_bacterium_unclassified;uncultured_bacterium_unclassified;uncultured_bacterium_unclassified;uncultured_bacterium_unclassified
HWI-M02808_115_AHB9G_1_1102_17827_19615	386	29	0	0	0	14	0	0	0	0	0	0	10	8	18	2	21	11	26	10	30	65	14	37	0	1	1	8	1	16	12	1	0	3	0	0	0	0	CASE_Unique	Bacteria;Actinobacteria;Actinobacteria;Propionibacteriales;Nocardioidaceae;Nocardioides;uncultured_organism
HWI-M02808_177_ANHM9_1_1104_12883_4883	384	0	0	6	18	4	3	6	0	14	31	0	14	6	6	16	26	57	55	3	0	2	9	17	6	3	1	0	0	43	0	0	0	0	3	0	0	0		Bacteria;Actinobacteria;Thermoleophilia;Solirubrobacterales;480-2;uncultured_bacterium;uncultured_bacterium_unclassified
HWI-M02808_115_AHB9G_1_1101_9628_26996	383	57	0	0	0	0	0	3	0	0	0	0	0	0	0	0	0	0	0	0	0	0	0	0	0	34	15	124	0	53	0	14	0	0	0	33	0	0	Ground	Bacteria;Proteobacteria;Deltaproteobacteria;Myxococcales;BIrii41;uncultured_delta_proteobacterium;uncultured_delta_proteobacterium_unclassified
HWI-M02808_115_AHB9G_1_1104_16118_2510	383	4	0	0	0	0	0	15	0	0	0	4	0	0	4	0	6	0	21	5	0	0	0	21	1	58	10	22	22	14	18	34	19	19	1	8	35	18		Bacteria;Proteobacteria;Alphaproteobacteria;Caulobacterales;Caulobacteraceae;Phenylobacterium;Phenylobacterium_unclassified
HWI-M02808_115_AHB9G_1_1101_27793_15413	383	22	3	0	6	24	0	7	0	4	2	6	8	8	0	1	0	2	0	1	0	0	0	0	0	52	2	10	16	12	13	12	26	0	27	44	9	10		Bacteria;Proteobacteria;Alphaproteobacteria;Rhodospirillales;JG37-AG-20;uncultured_bacterium;uncultured_bacterium_unclassified
HWI-M02808_177_ANHM9_1_1103_28256_15085	380	0	3	50	0	0	37	0	61	38	9	0	0	0	0	0	0	0	0	0	0	0	0	0	1	0	0	0	0	0	0	0	0	0	0	0	0	0		Bacteria;Actinobacteria;Thermoleophilia;Solirubrobacterales;Solirubrobacterales_unclassified;Solirubrobacterales_unclassified;Solirubrobacterales_unclassified
HWI-M02808_115_AHB9G_1_1101_17959_11523	380	0	0	0	0	0	0	0	0	0	0	0	0	0	0	0	0	0	0	0	0	0	0	0	0	28	7	47	18	33	0	14	13	18	0	103	70	12		Bacteria;Proteobacteria;Alphaproteobacteria;Rhizobiales;Rhizobiaceae;Rhizobium;Rhizobium_unclassified
HWI-M02808_115_AHB9G_1_1104_28574_17635	379	7	5	6	26	3	9	13	12	21	6	1	14	8	1	43	18	11	9	6	1	0	0	7	0	1	0	26	14	18	43	1	0	0	0	2	0	0		Bacteria;Proteobacteria;Alphaproteobacteria;Rhodospirillales;Rhodospirillales_Incertae_Sedis;Reyranella;Reyranella_unclassified
HWI-M02808_115_AHB9G_1_1107_9308_15237	379	6	8	16	12	25	18	9	7	23	28	46	41	10	0	27	4	0	31	0	0	4	0	1	14	4	0	0	0	0	7	0	0	0	11	0	0	0		Bacteria;Proteobacteria;Deltaproteobacteria;Myxococcales;Myxococcales_uncultured;Myxococcales_unclassified;Myxococcales_unclassified
HWI-M02808_115_AHB9G_1_2108_19726_6016	379	0	0	0	0	0	0	0	0	0	0	0	0	0	0	0	0	0	0	0	0	0	0	0	0	1	10	54	0	78	0	22	78	20	0	49	61	1		Bacteria;Bacteroidetes;Sphingobacteriia;Sphingobacteriales;Chitinophagaceae;Chitinophagaceae_uncultured;Chitinophagaceae_unclassified
HWI-M02808_115_AHB9G_1_1101_22323_4043	379	243	0	0	0	0	0	29	0	0	0	0	0	0	0	0	0	0	1	0	0	0	0	0	0	3	0	0	5	0	0	0	0	0	0	0	0	0		Bacteria;Proteobacteria;Alphaproteobacteria;Rhizobiales;Hyphomicrobiaceae;Rhodoplanes;uncultured_alpha_proteobacterium
HWI-M02808_177_ANHM9_1_1106_17529_6920	378	0	0	0	0	0	0	0	0	0	0	0	0	0	0	0	0	0	0	0	0	0	0	0	0	103	8	0	0	0	0	39	11	54	46	4	4	76	Ground	Bacteria;Proteobacteria;Alphaproteobacteria;Rhodospirillales;DA111;uncultured_bacterium;uncultured_bacterium_unclassified
HWI-M02808_115_AHB9G_1_2109_23327_15955	378	1	69	16	0	0	0	47	51	0	0	0	0	0	0	0	0	0	0	0	0	0	0	0	0	0	0	0	0	0	0	0	0	0	57	0	0	75		Bacteria;Acidobacteria;Acidobacteria;Acidobacteriales;Acidobacteriaceae_(Subgroup_1);Acidobacteriaceae_(Subgroup_1)_uncultured;Acidobacteriaceae_(Subgroup_1)_unclassified
HWI-M02808_115_AHB9G_1_1103_13802_26655	378	0	0	0	0	0	0	0	0	0	0	0	0	0	0	0	0	0	0	0	0	0	0	0	0	0	0	0	0	0	0	0	0	0	378	0	0	0	GRFL_Unique	Bacteria;Cyanobacteria;Chloroplast;Chloroplast_unclassified;Chloroplast_unclassified;Chloroplast_unclassified;Chloroplast_unclassified
HWI-M02808_115_AHB9G_1_1103_19932_3251	376	8	0	0	0	2	0	9	0	0	0	0	16	0	5	0	39	3	61	6	15	45	5	34	5	0	3	19	16	16	25	4	11	0	0	4	6	0		Bacteria;Actinobacteria;Actinobacteria;Micromonosporales;Micromonosporaceae;Actinoplanes;Actinoplanes_digitatis
HWI-M02808_177_ANHM9_1_1105_8944_14935	376	0	1	50	78	33	0	0	0	29	1	77	16	4	0	18	10	11	0	2	0	0	0	13	16	0	0	4	0	0	5	0	0	0	1	0	0	0		Bacteria;Acidobacteria;Acidobacteria;Acidobacteriales;Acidobacteriaceae_(Subgroup_1);Acidobacteriaceae_(Subgroup_1)_unclassified;Acidobacteriaceae_(Subgroup_1)_unclassified
HWI-M02808_115_AHB9G_1_1104_21804_3661	375	2	0	0	0	0	0	0	0	0	0	0	0	0	0	0	0	0	1	0	0	0	0	0	0	9	31	51	37	27	19	45	32	13	0	53	7	37		Bacteria;Proteobacteria;Betaproteobacteria;Nitrosomonadales;Nitrosomonadaceae;Nitrosomonadaceae_uncultured;Nitrosomonadaceae_unclassified
HWI-M02808_115_AHB9G_1_1101_16640_10526	375	29	1	0	14	157	0	71	0	0	2	0	0	0	0	0	0	0	0	2	0	0	0	2	0	6	0	0	4	0	11	4	2	0	0	0	0	0		Bacteria;Proteobacteria;Alphaproteobacteria;Rhizobiales;Rhizobiales_Incertae_Sedis;Rhizomicrobium;Rhizomicrobium_unclassified
HWI-M02808_115_AHB9G_1_1101_8895_5689	375	301	3	0	0	0	12	0	0	1	0	0	0	0	0	0	0	0	0	0	0	4	0	0	4	0	0	0	0	0	0	0	0	0	0	0	0	0		Bacteria;Verrucomicrobia;Spartobacteria;Chthoniobacterales;DA101_soil_group;uncultured_Verrucomicrobia_bacterium;uncultured_Verrucomicrobia_bacterium_unclassified
HWI-M02808_115_AHB9G_1_1113_16166_19263	375	8	0	0	0	2	0	0	0	0	1	127	0	0	5	0	0	6	0	0	45	0	0	0	0	0	4	0	47	0	3	0	6	0	0	1	14	0		Bacteria;Actinobacteria;Thermoleophilia;Solirubrobacterales;Conexibacteraceae;Conexibacter;uncultured_bacterium
HWI-M02808_115_AHB9G_1_1102_19795_4242	375	0	0	0	0	0	0	0	0	0	0	0	0	0	0	0	0	0	0	0	0	0	0	0	0	0	0	0	0	0	0	372	0	2	0	0	0	1	Ground	Bacteria;Proteobacteria;Deltaproteobacteria;Myxococcales;Phaselicystidaceae;Phaselicystis;Phaselicystis_unclassified
HWI-M02808_115_AHB9G_1_1107_23774_25770	374	10	0	0	0	12	0	4	0	0	0	16	0	0	0	0	0	0	0	0	0	0	0	0	0	41	1	6	0	22	0	29	31	17	48	33	45	58		Bacteria;Planctomycetes;Planctomycetacia;Planctomycetales;Planctomycetaceae;Planctomycetaceae_unclassified;Planctomycetaceae_unclassified
HWI-M02808_115_AHB9G_1_1102_17457_14311	374	27	0	0	0	4	0	0	0	0	0	0	0	0	4	0	0	0	1	0	1	0	0	27	0	17	0	0	39	13	184	0	0	24	0	0	0	16		Bacteria;Verrucomicrobia;Spartobacteria;Chthoniobacterales;DA101_soil_group;DA101_soil_group_unclassified;DA101_soil_group_unclassified
HWI-M02808_115_AHB9G_1_1109_4553_16184	373	0	0	0	0	0	0	0	0	0	0	0	0	0	0	0	0	0	0	0	0	0	0	1	0	7	0	9	0	2	0	3	33	2	0	119	193	3	Ground	Bacteria;Proteobacteria;Alphaproteobacteria;Sphingomonadales;Sphingomonadaceae;Sphingomonas;uncultured_Kaistobacter_sp.
HWI-M02808_115_AHB9G_1_1101_23844_14155	373	5	4	15	21	21	13	10	7	5	7	12	23	10	3	16	4	4	28	16	3	0	0	40	16	4	1	9	1	9	29	4	1	0	3	0	0	3		Bacteria;Planctomycetes;Phycisphaerae;WD2101_soil_group;WD2101_soil_group_unclassified;WD2101_soil_group_unclassified;WD2101_soil_group_unclassified
HWI-M02808_115_AHB9G_1_1103_18196_7496	372	12	5	4	39	28	8	21	3	0	4	13	0	30	0	20	5	10	44	5	0	10	0	34	11	0	0	0	0	0	7	0	0	0	35	0	0	1		Bacteria;Proteobacteria;Deltaproteobacteria;Myxococcales;Polyangiaceae;Sorangium;Sorangium_unclassified
HWI-M02808_115_AHB9G_1_1101_4347_15212	372	4	0	22	54	0	17	18	0	9	4	1	39	0	3	74	18	0	0	14	0	0	0	36	11	0	0	0	11	11	14	0	0	0	4	0	0	0		Bacteria;Proteobacteria;Alphaproteobacteria;Rhizobiales;BCf3-20;uncultured_bacterium;uncultured_bacterium_unclassified
HWI-M02808_115_AHB9G_1_1110_28240_16610	371	0	0	0	0	0	0	0	0	0	0	0	4	0	0	0	24	0	20	2	19	244	40	0	0	0	0	0	0	0	0	0	0	0	0	0	0	0	CASE_Unique	Bacteria;Cyanobacteria;Cyanobacteria;SubsectionIV;FamilyI;FamilyI_unclassified;FamilyI_unclassified
HWI-M02808_115_AHB9G_1_1102_7664_16000	371	39	0	0	0	0	0	142	0	0	0	0	0	0	0	0	0	3	1	1	0	0	0	0	0	2	0	0	42	23	1	33	10	29	0	12	10	10		Bacteria;Bacteroidetes;Sphingobacteriia;Sphingobacteriales;Chitinophagaceae;Chitinophagaceae_unclassified;Chitinophagaceae_unclassified
HWI-M02808_115_AHB9G_1_1104_12101_23100	370	0	0	0	0	0	0	0	0	0	0	0	4	0	12	4	0	0	3	0	31	297	0	9	0	0	0	0	0	0	0	0	0	0	0	0	0	0	CASE_Unique	Bacteria;Acidobacteria;Holophagae;Subgroup_10;ABS-19;ABS-19_unclassified;ABS-19_unclassified
HWI-M02808_115_AHB9G_1_1101_26079_9999	370	0	0	0	0	0	0	0	0	0	0	0	0	0	0	0	0	0	0	0	0	0	0	0	0	12	10	16	9	3	0	14	64	51	0	67	87	27		Bacteria;Proteobacteria;Betaproteobacteria;SC-I-84;SC-I-84_unclassified;SC-I-84_unclassified;SC-I-84_unclassified
HWI-M02808_115_AHB9G_1_1101_6448_23959	370	41	5	4	18	9	0	22	0	0	3	4	11	0	0	4	1	1	3	1	0	0	0	0	0	21	5	12	38	2	98	11	0	13	10	15	1	7		Bacteria;Acidobacteria;Acidobacteria;Subgroup_3;Subgroup_3_unclassified;Subgroup_3_unclassified;Subgroup_3_unclassified
HWI-M02808_177_ANHM9_1_1102_12596_11341	369	0	0	0	2	0	0	15	0	0	0	0	14	1	10	2	0	0	28	7	0	3	1	0	0	0	0	4	38	18	150	16	1	2	0	1	0	0	Ground	Bacteria;Planctomycetes;vadinHA49;vadinHA49_unclassified;vadinHA49_unclassified;vadinHA49_unclassified;vadinHA49_unclassified
HWI-M02808_115_AHB9G_1_1104_13950_15435	369	0	4	0	0	26	0	7	0	0	0	0	67	17	0	0	5	53	71	33	0	0	1	0	0	0	4	0	0	34	17	0	0	0	0	0	0	0	CAAT_Inhibited	Bacteria;Proteobacteria;Deltaproteobacteria;Myxococcales;Myxococcales_unclassified;Myxococcales_unclassified;Myxococcales_unclassified
HWI-M02808_115_AHB9G_1_1104_14356_5489	368	0	0	0	0	2	0	4	0	0	0	0	0	0	0	0	0	0	0	0	0	0	0	0	6	0	16	113	2	85	0	10	29	14	0	25	53	7		Bacteria;Bacteroidetes;Sphingobacteriia;Sphingobacteriales;Chitinophagaceae;Chitinophaga;uncultured_bacterium
HWI-M02808_115_AHB9G_1_1101_3795_11033	368	0	0	0	1	7	0	0	0	0	0	0	3	0	8	1	26	1	6	11	13	2	17	5	0	0	0	12	50	28	32	0	44	0	0	0	79	0		Bacteria;Acidobacteria;Acidobacteria;Subgroup_6;Subgroup_6_unclassified;Subgroup_6_unclassified;Subgroup_6_unclassified
HWI-M02808_177_ANHM9_1_1104_17250_25307	367	0	0	0	0	0	0	0	0	0	0	0	0	0	0	0	0	1	0	0	0	0	0	0	0	0	5	89	10	86	0	23	23	19	0	83	18	6		Bacteria;Proteobacteria;Gammaproteobacteria;Xanthomonadales;Xanthomonadales_uncultured;Xanthomonadales_unclassified;Xanthomonadales_unclassified
HWI-M02808_177_ANHM9_1_1102_18387_13689	367	0	9	35	0	0	17	0	12	32	0	0	0	0	0	8	0	0	0	0	0	0	0	0	1	34	4	0	0	0	0	0	15	0	54	7	0	104		Bacteria;Proteobacteria;Gammaproteobacteria;Xanthomonadales;Xanthomonadales_uncultured;Xanthomonadales_unclassified;Xanthomonadales_unclassified
HWI-M02808_115_AHB9G_1_1103_4388_10461	367	13	0	42	69	4	10	24	0	18	5	27	23	7	0	25	3	11	0	1	0	0	0	5	7	0	1	0	0	4	41	0	0	0	1	0	0	0		Bacteria;Acidobacteria;Acidobacteria;Subgroup_3;Unknown_Family;Bryobacter;uncultured_bacterium
HWI-M02808_115_AHB9G_1_1103_22717_13794	367	0	0	0	0	0	0	0	0	0	0	0	7	2	0	0	15	0	0	0	0	0	0	7	0	0	10	84	46	74	25	17	3	19	8	30	0	6		Bacteria;Acidobacteria;Acidobacteria;Acidobacteriales;Acidobacteriaceae_(Subgroup_1);Edaphobacter;uncultured_Acidobacteria_bacterium
HWI-M02808_115_AHB9G_1_1106_8372_21386	367	0	0	0	0	0	0	0	0	0	0	0	0	0	0	0	0	0	0	0	0	0	0	0	0	3	15	35	174	38	0	26	41	0	0	11	12	0	Ground	Bacteria;Bacteroidetes;Cytophagia;Cytophagales;Cytophagaceae;Cytophagaceae_uncultured;Cytophagaceae_unclassified
HWI-M02808_115_AHB9G_1_1101_10719_8310	366	40	0	0	4	0	0	0	0	0	0	0	0	0	0	1	0	11	0	0	0	0	0	0	1	168	21	26	0	0	10	1	9	0	16	5	0	47	Ground	Bacteria;Bacteroidetes;Sphingobacteriia;Sphingobacteriales;Chitinophagaceae;Chitinophagaceae_unclassified;Chitinophagaceae_unclassified
HWI-M02808_115_AHB9G_1_1110_3372_14763	366	4	7	18	11	35	31	8	4	111	16	26	0	7	0	16	0	1	0	1	0	0	0	0	3	0	0	0	3	2	1	0	0	0	29	0	0	0		Bacteria;Proteobacteria;Alphaproteobacteria;Rhizobiales;Rhizobiales_Incertae_Sedis;Rhizomicrobium;Rhizomicrobium_unclassified
HWI-M02808_115_AHB9G_1_1103_25372_18327	366	13	0	2	0	0	0	0	0	0	0	0	100	0	1	0	2	0	0	0	0	5	0	0	0	1	0	0	0	0	0	12	0	2	4	14	168	39		Bacteria;Proteobacteria;Gammaproteobacteria;Pseudomonadales;Pseudomonadaceae;Pseudomonas;Pseudomonas_unclassified
HWI-M02808_115_AHB9G_1_1102_19901_19241	366	6	0	0	0	24	0	0	0	0	8	24	84	0	5	0	0	9	90	0	0	2	4	23	30	2	0	0	0	0	0	0	0	0	16	6	0	0		Bacteria;Actinobacteria;Actinobacteria;Frankiales;Frankiaceae;Jatrophihabitans;Jatrophihabitans_unclassified
HWI-M02808_115_AHB9G_1_2102_14111_14923	366	0	0	0	3	0	0	0	0	0	0	0	0	0	0	0	0	0	0	0	0	15	0	0	0	4	7	17	0	45	0	46	26	38	0	70	72	17		Bacteria;Gemmatimonadetes;Gemmatimonadetes;Gemmatimonadales;Gemmatimonadaceae;Gemmatimonas;Gemmatimonas_unclassified
HWI-M02808_115_AHB9G_1_1102_14640_8726	365	52	0	0	0	13	0	22	0	0	0	4	62	2	10	0	37	0	21	0	0	13	12	4	0	0	0	5	57	13	27	1	2	0	0	1	0	0		Bacteria;Chloroflexi;Anaerolineae;Anaerolineales;Anaerolineaceae;Anaerolineaceae_uncultured;wastewater_metagenome
HWI-M02808_177_ANHM9_1_1103_7430_7126	364	0	41	12	0	0	0	0	9	292	0	0	0	0	0	0	0	0	0	0	0	0	0	0	0	10	0	0	0	0	0	0	0	0	0	0	0	0		Bacteria;Acidobacteria;Acidobacteria;Acidobacteriales;Acidobacteriaceae_(Subgroup_1);Acidobacteriaceae_(Subgroup_1)_uncultured;Acidobacteriaceae_(Subgroup_1)_unclassified
HWI-M02808_115_AHB9G_1_1113_3610_19237	362	0	0	0	0	0	0	0	0	0	0	0	0	0	0	0	0	0	12	0	0	0	0	0	0	3	8	94	17	59	0	26	22	0	10	71	0	4	Ground	Bacteria;Actinobacteria;Actinobacteria;Micrococcales;Microbacteriaceae;Microbacteriaceae_unclassified;Microbacteriaceae_unclassified
HWI-M02808_115_AHB9G_1_2104_12447_23799	361	0	0	1	22	6	12	2	0	10	13	0	7	1	0	65	2	0	0	2	0	0	0	191	10	0	0	0	0	0	8	0	0	0	0	0	0	0		Bacteria;WD272;uncultured_bacterium;uncultured_bacterium_unclassified;uncultured_bacterium_unclassified;uncultured_bacterium_unclassified;uncultured_bacterium_unclassified
HWI-M02808_115_AHB9G_1_1103_9493_23918	361	0	16	16	0	0	0	0	1	10	0	0	0	0	0	0	0	0	0	0	0	0	0	0	0	38	0	0	0	0	0	24	2	11	187	5	7	10	Ground	Bacteria;Proteobacteria;Alphaproteobacteria;Rhizobiales;Rhizobiales_Incertae_Sedis;Rhizomicrobium;Rhizomicrobium_unclassified
HWI-M02808_115_AHB9G_1_1104_8657_6524	360	0	0	0	0	0	0	24	0	0	0	0	13	0	0	0	23	0	51	37	0	0	1	0	2	0	0	29	11	62	78	0	0	0	0	0	0	0	CAAT_Inhibited	Bacteria;Acidobacteria;Acidobacteria;Subgroup_2;uncultured_Acidobacteria_bacterium;uncultured_Acidobacteria_bacterium_unclassified;uncultured_Acidobacteria_bacterium_unclassified
HWI-M02808_177_ANHM9_1_2113_10944_12393	360	0	2	54	0	0	4	0	115	55	21	0	0	0	0	8	0	0	0	0	0	0	0	0	0	0	0	0	0	0	0	8	0	0	0	0	0	0		Bacteria;WD272;uncultured_forest_soil_bacterium;uncultured_forest_soil_bacterium_unclassified;uncultured_forest_soil_bacterium_unclassified;uncultured_forest_soil_bacterium_unclassified;uncultured_forest_soil_bacterium_unclassified
HWI-M02808_115_AHB9G_1_1102_12778_15359	360	71	0	0	0	4	0	109	0	0	0	0	96	3	0	0	1	2	0	12	0	0	0	1	0	27	0	1	0	4	14	0	0	0	0	11	0	0		Bacteria;Verrucomicrobia;Spartobacteria;Chthoniobacterales;DA101_soil_group;uncultured_Verrucomicrobia_bacterium;uncultured_Verrucomicrobia_bacterium_unclassified
HWI-M02808_115_AHB9G_1_1101_11967_21467	359	48	2	0	5	15	0	2	0	0	0	7	38	3	7	12	13	0	97	5	0	8	14	30	2	3	0	0	0	0	29	1	2	0	0	0	0	0		Bacteria;Acidobacteria;Acidobacteria;Subgroup_3;Unknown_Family;Candidatus_Solibacter;Candidatus_Solibacter_unclassified
HWI-M02808_115_AHB9G_1_1102_9964_25365	359	14	0	0	35	61	0	31	0	0	0	82	32	0	0	24	13	5	23	0	0	0	0	0	14	0	0	0	0	0	8	0	0	0	0	0	0	0		Bacteria;Acidobacteria;Acidobacteria;Subgroup_3;Unknown_Family;Candidatus_Solibacter;uncultured_forest_soil_bacterium
HWI-M02808_177_ANHM9_1_1114_22125_8966	359	0	1	0	0	0	0	0	7	302	0	0	0	0	0	6	0	0	0	0	0	0	0	0	0	3	0	0	0	0	0	0	1	0	15	0	0	9		Bacteria;Acidobacteria;Acidobacteria;Subgroup_2;bacterium_enrichment_culture_clone_heteroC52_4W;bacterium_enrichment_culture_clone_heteroC52_4W_unclassified;bacterium_enrichment_culture_clone_heteroC52_4W_unclassified
HWI-M02808_115_AHB9G_1_1102_22400_3769	359	0	19	2	0	27	0	9	10	0	2	0	14	0	3	0	4	1	13	0	2	0	0	0	4	29	0	13	0	32	79	0	13	8	0	13	11	16		Bacteria;Verrucomicrobia;Opitutae;Opitutales;Opitutaceae;Opitutus;uncultured_bacterium
HWI-M02808_115_AHB9G_1_1101_23864_7124	359	50	4	9	0	19	11	14	23	59	6	49	3	0	0	23	3	3	0	0	0	0	0	0	3	13	0	0	0	0	38	9	1	0	0	0	0	1		Bacteria;Acidobacteria;Acidobacteria;Subgroup_3;Unknown_Family;Bryobacter;uncultured_Acidobacteria_bacterium
HWI-M02808_115_AHB9G_1_1102_18512_7332	358	12	0	4	10	16	3	2	0	0	0	1	19	1	5	0	20	0	100	5	0	56	10	26	1	1	0	5	19	18	8	0	0	0	0	0	0	0		Bacteria;Bacteroidetes;Sphingobacteriia;Sphingobacteriales;Chitinophagaceae;Parafilimonas;uncultured_bacterium
HWI-M02808_115_AHB9G_1_1101_18857_14906	358	0	0	0	0	0	0	0	0	0	0	0	0	0	0	0	0	0	0	0	0	0	0	0	0	28	22	16	0	2	0	15	93	46	0	85	41	0		Bacteria;Proteobacteria;Gammaproteobacteria;Xanthomonadales;Xanthomonadales_uncultured;Xanthomonadales_unclassified;Xanthomonadales_unclassified
HWI-M02808_177_ANHM9_1_1112_12574_17140	358	0	4	2	0	0	0	0	20	7	0	0	0	0	0	0	0	0	0	0	0	0	0	0	0	12	0	0	0	0	0	3	4	5	220	0	0	54	Ground	Bacteria;Proteobacteria;Alphaproteobacteria;Rhodospirillales;DA111;uncultured_alpha_proteobacterium;uncultured_alpha_proteobacterium_unclassified
HWI-M02808_115_AHB9G_1_1101_19009_16175	358	44	0	0	0	0	0	0	0	0	0	3	0	0	0	0	0	0	0	0	0	0	0	0	0	0	0	26	0	1	0	0	154	0	0	41	60	0	Ground	Bacteria;Nitrospirae;Nitrospira;Nitrospirales;Nitrospiraceae;Nitrospira;Nitrospira_unclassified
HWI-M02808_115_AHB9G_1_1103_6015_8024	357	43	2	0	27	0	0	0	0	0	0	0	25	5	0	22	44	0	68	0	0	0	0	54	3	8	1	0	0	0	47	0	0	0	0	6	0	0		Bacteria;Planctomycetes;Planctomycetacia;Planctomycetales;Planctomycetaceae;Planctomyces;uncultured_bacterium
HWI-M02808_115_AHB9G_1_2104_25829_18659	356	0	0	0	1	0	0	0	0	0	0	4	0	0	0	0	0	0	0	0	0	0	0	0	0	28	17	13	0	1	0	22	42	24	0	79	87	33		Bacteria;Proteobacteria;Alphaproteobacteria;Rhizobiales;Rhizobiales_unclassified;Rhizobiales_unclassified;Rhizobiales_unclassified
HWI-M02808_115_AHB9G_1_1103_7477_8751	355	11	0	0	13	4	0	0	0	0	0	0	100	0	21	0	95	0	24	0	8	0	21	0	0	0	0	0	0	0	39	0	0	0	0	0	0	0	CAAT_Inhibited	Bacteria;Proteobacteria;Alphaproteobacteria;Sphingomonadales;Sphingomonadales_unclassified;Sphingomonadales_unclassified;Sphingomonadales_unclassified
HWI-M02808_115_AHB9G_1_1103_14542_17792	355	17	0	0	0	10	0	7	0	0	0	2	7	0	0	0	1	3	19	0	13	3	8	4	7	0	19	12	0	32	32	9	37	5	3	23	30	6		Bacteria;Actinobacteria;Thermoleophilia;Solirubrobacterales;Solirubrobacteraceae;Solirubrobacter;uncultured_bacterium
HWI-M02808_115_AHB9G_1_2111_20183_25852	355	1	0	2	4	3	0	3	0	0	0	0	0	0	0	0	4	0	0	0	0	0	0	0	0	1	6	29	99	52	13	3	6	2	0	25	91	0		Bacteria;Actinobacteria;Actinobacteria;Streptomycetales;Streptomycetaceae;Streptomyces;Streptomyces_aureus
HWI-M02808_115_AHB9G_1_1102_7104_10280	355	0	0	121	0	0	52	0	0	0	0	0	9	6	0	0	0	17	15	0	0	0	1	0	20	0	0	0	18	0	0	5	6	1	0	19	0	6		Bacteria;Proteobacteria;Alphaproteobacteria;Rhizobiales;Rhizobiales_unclassified;Rhizobiales_unclassified;Rhizobiales_unclassified
HWI-M02808_115_AHB9G_1_1102_4389_8457	354	95	0	0	0	0	0	0	0	0	0	0	47	0	13	0	0	0	0	1	20	61	67	0	0	0	2	0	0	0	16	0	6	1	0	5	0	0		Bacteria;Bacteroidetes;Sphingobacteriia;Sphingobacteriales;Chitinophagaceae;Terrimonas;Terrimonas_unclassified
HWI-M02808_115_AHB9G_1_2108_12486_11160	354	0	0	0	0	0	0	0	0	0	0	0	0	67	27	0	0	0	142	53	0	0	29	0	0	0	0	0	0	0	0	0	0	0	0	0	0	0	CASE_Unique	Bacteria;Actinobacteria;Actinobacteria;Propionibacteriales;Nocardioidaceae;Nocardioides;Nocardioides_unclassified
HWI-M02808_177_ANHM9_1_1107_4955_8095	353	0	4	14	0	0	0	28	6	0	0	0	0	0	0	0	0	0	0	1	0	0	0	0	0	50	0	31	0	0	0	0	0	0	0	104	0	68		Bacteria;Proteobacteria;Alphaproteobacteria;Rhizobiales;Rhizobiales_unclassified;Rhizobiales_unclassified;Rhizobiales_unclassified
HWI-M02808_115_AHB9G_1_1101_16035_7755	353	0	0	0	0	0	0	0	0	0	0	0	0	0	0	0	0	0	0	0	0	0	0	0	0	0	0	0	0	0	0	0	0	0	353	0	0	0	GRFL_Unique	Bacteria;Verrucomicrobia;OPB35_soil_group;OPB35_soil_group_unclassified;OPB35_soil_group_unclassified;OPB35_soil_group_unclassified;OPB35_soil_group_unclassified
HWI-M02808_115_AHB9G_1_2108_22118_14423	352	0	10	44	0	0	0	37	0	0	0	0	0	0	0	0	0	1	0	0	0	0	0	0	0	0	0	0	65	170	0	0	0	0	0	0	0	0		Bacteria;Proteobacteria;Gammaproteobacteria;Pseudomonadales;Pseudomonadaceae;Pseudomonas;Pseudomonas_unclassified
HWI-M02808_177_ANHM9_1_1103_7005_15716	351	0	16	48	0	0	2	0	44	141	4	0	0	2	0	19	0	0	0	0	0	0	0	0	2	0	0	0	0	0	0	14	0	0	25	9	0	5		Bacteria;WD272;uncultured_bacterium;uncultured_bacterium_unclassified;uncultured_bacterium_unclassified;uncultured_bacterium_unclassified;uncultured_bacterium_unclassified
HWI-M02808_115_AHB9G_1_1110_18896_21513	350	0	0	0	0	0	0	3	0	0	0	0	17	0	49	1	28	3	26	0	13	24	5	48	0	0	0	43	39	12	26	0	0	0	0	0	0	0	CASE_Unique	Bacteria;Bacteroidetes;Cytophagia;Cytophagales;Cytophagaceae;Cytophagaceae_uncultured;Cytophagaceae_unclassified
HWI-M02808_177_ANHM9_1_1106_9655_17511	350	0	13	31	0	0	0	0	79	35	0	0	0	5	0	56	0	0	0	0	0	0	0	0	1	3	1	6	0	0	31	16	0	5	16	0	0	0		Bacteria;Planctomycetes;Phycisphaerae;WD2101_soil_group;uncultured_bacterium;uncultured_bacterium_unclassified;uncultured_bacterium_unclassified
HWI-M02808_177_ANHM9_1_1102_26970_8674	350	0	1	0	0	0	0	0	0	0	0	0	0	0	0	0	12	2	0	2	24	257	6	0	1	0	0	0	0	0	0	0	0	0	0	0	0	0	CASE_Unique	Bacteria;Cyanobacteria;Cyanobacteria;SubsectionIII;FamilyI;Leptolyngbya;Leptolyngbya_unclassified
HWI-M02808_115_AHB9G_1_1102_20293_20382	350	23	0	0	0	0	0	0	0	0	0	6	0	0	0	0	0	0	0	0	0	0	0	0	0	66	4	6	0	0	180	0	0	0	0	3	2	0	Ground	Bacteria;Bacteroidetes;Sphingobacteriia;Sphingobacteriales;Chitinophagaceae;Chitinophagaceae_unclassified;Chitinophagaceae_unclassified
HWI-M02808_115_AHB9G_1_1101_23981_10917	349	341	0	0	0	0	0	0	0	0	0	0	0	0	0	0	0	0	2	0	0	0	0	0	0	0	0	0	0	0	0	0	0	0	0	0	4	0		Bacteria;Proteobacteria;Deltaproteobacteria;Myxococcales;Phaselicystidaceae;Phaselicystis;Phaselicystis_unclassified
HWI-M02808_115_AHB9G_1_2110_14372_17750	349	0	0	2	0	7	0	148	0	0	0	0	4	2	13	0	5	0	14	14	0	52	5	44	0	0	0	9	0	3	19	1	0	0	0	0	0	0		Bacteria;Bacteroidetes;Sphingobacteriia;Sphingobacteriales;Chitinophagaceae;Chitinophagaceae_uncultured;uncultured_bacterium
HWI-M02808_115_AHB9G_1_1101_7624_5800	348	0	0	0	0	0	0	0	0	0	0	0	0	0	0	0	0	0	0	0	0	0	0	0	0	125	19	0	0	0	0	43	65	10	0	48	36	0		Bacteria;Proteobacteria;Alphaproteobacteria;Rhodospirillales;MND8;uncultured_bacterium;uncultured_bacterium_unclassified
HWI-M02808_177_ANHM9_1_1113_10388_18919	348	0	0	0	0	0	0	0	0	0	0	0	0	0	0	0	0	0	0	0	0	1	0	0	0	21	21	32	61	6	3	48	33	24	0	27	65	0		Bacteria;Proteobacteria;Alphaproteobacteria;Caulobacterales;Hyphomonadaceae;Woodsholea;uncultured_bacterium
HWI-M02808_115_AHB9G_1_1107_24948_8707	348	0	0	0	1	0	16	0	0	156	0	18	0	0	0	0	0	4	0	0	0	0	0	0	8	0	0	0	0	0	134	0	0	0	0	0	7	0		Bacteria;Proteobacteria;Betaproteobacteria;Burkholderiales;Burkholderiaceae;Burkholderia;Burkholderia_unclassified
HWI-M02808_115_AHB9G_1_1102_20581_11884	348	24	0	0	0	0	0	1	0	0	0	0	9	1	1	0	8	0	0	1	1	0	1	0	0	0	0	38	0	0	59	0	77	0	0	0	124	0		Bacteria;Acidobacteria;Acidobacteria;Subgroup_3;Unknown_Family;Candidatus_Solibacter;Candidatus_Solibacter_unclassified
HWI-M02808_115_AHB9G_1_1101_5918_10151	347	13	19	1	1	8	0	11	21	16	16	114	12	0	0	14	10	0	0	15	0	0	0	0	0	2	0	0	0	2	13	0	0	0	0	0	0	0		Bacteria;Proteobacteria;Deltaproteobacteria;Myxococcales;Polyangiaceae;Sorangium;Sorangium_unclassified
HWI-M02808_177_ANHM9_1_1110_4231_9561	347	0	0	0	0	0	0	0	0	0	0	0	0	0	0	0	0	0	0	0	0	0	0	0	0	0	2	65	0	185	0	0	62	0	0	21	10	0	Ground	Bacteria;Proteobacteria;Betaproteobacteria;Methylophilales;Methylophilaceae;Methylophilaceae_uncultured;Methylophilaceae_unclassified
HWI-M02808_115_AHB9G_1_1114_11735_7639	347	1	0	0	0	0	0	0	0	0	0	0	0	0	0	0	0	0	0	0	0	0	0	0	0	71	7	9	0	6	0	71	42	26	5	0	38	71		Bacteria;Acidobacteria;Acidobacteria;Subgroup_3;Unknown_Family;Candidatus_Solibacter;uncultured_Acidobacteria_bacterium
HWI-M02808_115_AHB9G_1_1102_10922_13453	347	6	0	0	0	0	0	0	0	0	0	0	0	0	0	0	0	0	0	0	0	0	0	0	0	14	16	78	108	18	8	43	3	15	0	6	7	0		Bacteria;Planctomycetes;vadinHA49;vadinHA49_unclassified;vadinHA49_unclassified;vadinHA49_unclassified;vadinHA49_unclassified
HWI-M02808_115_AHB9G_1_1103_10586_20736	346	0	0	0	29	32	9	11	0	0	11	53	28	19	1	34	17	6	16	6	0	28	5	11	26	0	0	0	0	0	0	0	0	0	0	0	0	0		Bacteria;Verrucomicrobia;Opitutae;Opitutales;Opitutaceae;Opitutus;Opitutus_unclassified
HWI-M02808_115_AHB9G_1_2105_25273_6875	346	1	0	0	0	0	0	4	0	0	0	6	13	0	1	2	16	0	2	0	1	3	0	17	0	8	0	74	0	91	33	0	28	13	5	0	15	0		Bacteria;Proteobacteria;Betaproteobacteria;Rhodocyclales;Rhodocyclaceae;Uliginosibacterium;uncultured_bacterium
HWI-M02808_177_ANHM9_1_2110_6885_8203	345	0	0	0	7	6	0	2	0	0	0	0	29	18	6	2	8	5	78	21	0	22	0	55	0	0	0	5	24	3	10	0	0	0	0	0	0	0		Bacteria;Chloroflexi;Anaerolineae;Anaerolineales;Anaerolineaceae;Anaerolineaceae_uncultured;uncultured_Gemmatimonadetes_bacterium
HWI-M02808_177_ANHM9_1_1108_5687_14283	345	0	0	34	56	7	20	7	0	2	3	0	24	6	0	15	55	7	2	2	2	12	0	67	0	0	0	0	0	0	3	0	0	0	0	0	0	0		Bacteria;Acidobacteria;Acidobacteria;Acidobacteriales;Acidobacteriaceae_(Subgroup_1);Granulicella;uncultured_Acidobacteria_bacterium
HWI-M02808_115_AHB9G_1_1101_22762_7150	344	91	0	0	14	8	0	0	0	0	0	75	62	0	3	2	16	0	0	7	1	0	1	11	0	0	0	0	0	46	0	0	0	0	0	0	0	0		Bacteria;Proteobacteria;Betaproteobacteria;Nitrosomonadales;Nitrosomonadaceae;Nitrosomonadaceae_uncultured;uncultured_Nitrosomonadaceae_bacterium
HWI-M02808_115_AHB9G_1_1107_17365_10709	344	33	9	0	0	0	0	14	0	0	0	0	0	0	0	0	0	0	0	0	0	0	0	0	0	59	18	9	0	0	0	18	0	4	78	26	0	59		Bacteria;Proteobacteria;Alphaproteobacteria;Rhizobiales;Rhizobiales_Incertae_Sedis;Rhizomicrobium;Rhizomicrobium_unclassified
HWI-M02808_115_AHB9G_1_1113_21795_27730	344	4	0	0	80	42	44	26	0	6	0	30	43	0	0	11	0	21	0	15	0	0	0	0	18	0	0	0	0	0	0	0	0	0	0	0	0	0		Bacteria;Verrucomicrobia;Spartobacteria;Chthoniobacterales;Chthoniobacterales_unclassified;Chthoniobacterales_unclassified;Chthoniobacterales_unclassified
HWI-M02808_115_AHB9G_1_1105_17922_14454	344	6	0	0	2	151	5	0	0	1	0	15	0	0	66	0	4	0	0	0	0	0	1	0	0	0	0	3	0	3	20	0	4	0	0	0	6	0		Bacteria;Acidobacteria;Acidobacteria;Subgroup_4;Subgroup_4_unclassified;Subgroup_4_unclassified;Subgroup_4_unclassified
HWI-M02808_115_AHB9G_1_1101_8764_22852	344	0	0	0	0	0	0	0	0	0	0	0	0	0	0	0	0	0	0	0	0	0	0	0	0	43	33	18	0	0	0	48	49	25	0	57	40	0	Ground	Bacteria;Acidobacteria;Acidobacteria;Subgroup_17;uncultured_Acidobacteria_bacterium;uncultured_Acidobacteria_bacterium_unclassified;uncultured_Acidobacteria_bacterium_unclassified
HWI-M02808_115_AHB9G_1_2109_11468_3616	344	6	0	2	0	1	0	0	0	0	0	53	68	0	0	0	41	2	2	2	0	6	7	22	0	0	0	0	13	0	109	0	0	0	0	0	0	0		Bacteria;Proteobacteria;Gammaproteobacteria;Pseudomonadales;Pseudomonadaceae;Pseudomonas;Pseudomonas_unclassified
HWI-M02808_115_AHB9G_1_1114_11317_3180	343	6	1	4	6	22	0	13	8	2	4	9	11	3	0	14	6	3	21	0	0	0	0	11	0	0	1	10	3	0	69	20	2	10	65	0	0	0		Bacteria;Proteobacteria;Deltaproteobacteria;Myxococcales;Myxococcales_unclassified;Myxococcales_unclassified;Myxococcales_unclassified
HWI-M02808_177_ANHM9_1_1109_23584_16505	343	0	0	0	85	16	64	11	0	11	0	33	0	0	0	39	0	20	0	0	0	0	0	0	20	0	0	0	0	6	0	1	0	5	0	0	0	0		Bacteria;Proteobacteria;Alphaproteobacteria;Rhodospirillales;Rhodospirillaceae;Inquilinus;uncultured_eubacterium_WD278
HWI-M02808_115_AHB9G_1_1103_8376_16382	342	5	0	0	0	12	0	11	0	0	0	11	16	1	12	0	7	9	3	10	0	14	0	3	0	13	16	15	35	20	8	6	19	0	0	20	7	23		Bacteria;Actinobacteria;Thermoleophilia;Solirubrobacterales;480-2;uncultured_Rubrobacteraceae_bacterium;uncultured_Rubrobacteraceae_bacterium_unclassified
HWI-M02808_115_AHB9G_1_1102_27125_9945	341	24	0	0	0	0	0	8	0	0	0	0	16	0	13	0	16	1	0	0	30	96	26	4	0	0	0	5	7	13	24	0	0	0	0	0	0	0	CAAT_Inhibited	Bacteria;Actinobacteria;Actinobacteria;Micromonosporales;Micromonosporaceae;Micromonosporaceae_unclassified;Micromonosporaceae_unclassified
HWI-M02808_115_AHB9G_1_2103_22764_19226	341	0	0	0	0	2	0	0	0	0	0	0	0	0	0	0	0	0	0	0	0	0	0	0	0	25	0	34	7	13	0	54	20	25	0	83	48	25		Bacteria;Proteobacteria;Betaproteobacteria;Burkholderiales;Comamonadaceae;Comamonadaceae_unclassified;Comamonadaceae_unclassified
HWI-M02808_115_AHB9G_1_1101_19314_7664	340	331	0	0	0	0	0	0	0	0	0	0	0	0	0	0	0	0	0	0	0	0	0	0	0	0	0	0	0	0	0	0	0	0	0	0	0	0		Bacteria;Acidobacteria;Acidobacteria;Subgroup_4;RB41;RB41_unclassified;RB41_unclassified
HWI-M02808_115_AHB9G_1_1107_21173_16422	339	6	0	0	4	4	0	23	0	0	0	11	11	5	20	0	14	6	39	19	10	5	13	17	4	0	1	3	6	11	35	0	0	0	0	2	0	0		Bacteria;Actinobacteria;Thermoleophilia;Solirubrobacterales;Solirubrobacterales_uncultured;uncultured_bacterium;uncultured_bacterium_unclassified
HWI-M02808_115_AHB9G_1_2106_16629_10854	339	0	0	0	0	0	0	0	0	0	0	0	0	0	0	0	0	0	1	0	0	0	0	0	0	0	0	15	0	2	0	10	165	23	0	64	44	0	Ground	Bacteria;Proteobacteria;Gammaproteobacteria;Xanthomonadales;Xanthomonadales_uncultured;Xanthomonadales_unclassified;Xanthomonadales_unclassified
HWI-M02808_115_AHB9G_1_1101_10465_6708	338	222	0	0	0	0	0	5	0	0	0	0	0	0	0	0	3	0	0	0	0	0	0	0	0	0	5	33	7	0	0	13	0	4	0	12	29	0		Bacteria;Chloroflexi;Anaerolineae;Anaerolineales;Anaerolineaceae;Anaerolineaceae_uncultured;uncultured_Gemmatimonadetes_bacterium
HWI-M02808_177_ANHM9_1_1104_19737_20827	338	0	0	0	3	0	0	0	0	0	0	0	4	0	8	0	6	0	0	1	0	5	8	0	0	20	8	58	14	53	26	2	34	8	0	23	38	0		Bacteria;Proteobacteria;Alphaproteobacteria;Rhodospirillales;Rhodospirillales_Incertae_Sedis;Reyranella;uncultured_proteobacterium
HWI-M02808_115_AHB9G_1_1102_22674_15543	338	8	0	25	9	16	15	27	0	30	3	13	13	5	0	7	9	2	25	0	0	0	0	20	0	4	0	4	4	7	42	4	0	1	5	10	13	7		Bacteria;Proteobacteria;Deltaproteobacteria;GR-WP33-30;uncultured_Firmicutes_bacterium;uncultured_Firmicutes_bacterium_unclassified;uncultured_Firmicutes_bacterium_unclassified
HWI-M02808_177_ANHM9_1_1102_10927_18413	338	0	2	20	39	22	1	23	0	3	1	11	36	3	1	5	29	25	19	7	0	0	0	63	5	0	0	0	0	0	8	0	0	0	0	0	0	0		Bacteria;Verrucomicrobia;Opitutae;Opitutales;Opitutaceae;Opitutus;Opitutus_unclassified
HWI-M02808_115_AHB9G_1_1103_17503_18631	338	2	4	3	21	2	11	12	2	10	0	0	8	8	11	5	0	1	7	11	0	6	9	29	1	0	4	1	5	0	30	0	1	2	61	7	5	0		Bacteria;Proteobacteria;Alphaproteobacteria;Caulobacterales;Caulobacteraceae;Caulobacteraceae_uncultured;uncultured_eubacterium_WD297
HWI-M02808_177_ANHM9_1_1106_14755_5927	338	0	0	58	29	0	29	0	69	22	0	23	8	21	0	0	0	0	0	0	0	0	0	3	21	0	0	0	0	0	0	0	0	0	15	0	0	0		Bacteria;WD272;uncultured_bacterium;uncultured_bacterium_unclassified;uncultured_bacterium_unclassified;uncultured_bacterium_unclassified;uncultured_bacterium_unclassified
HWI-M02808_177_ANHM9_1_1102_27018_23491	337	0	0	0	0	0	0	0	0	0	0	0	0	0	0	0	0	0	0	0	0	0	0	0	0	0	19	0	0	36	0	27	46	35	0	113	43	0		Bacteria;Proteobacteria;Betaproteobacteria;Nitrosomonadales;Nitrosomonadaceae;Nitrosomonadaceae_uncultured;Nitrosomonadaceae_unclassified
HWI-M02808_115_AHB9G_1_1103_6765_26027	337	3	0	0	0	5	0	6	0	0	0	16	0	0	0	8	5	0	4	0	0	0	0	12	3	36	8	15	7	25	18	58	0	30	0	19	19	14		Bacteria;Proteobacteria;Alphaproteobacteria;Alphaproteobacteria_unclassified;Alphaproteobacteria_unclassified;Alphaproteobacteria_unclassified;Alphaproteobacteria_unclassified
HWI-M02808_115_AHB9G_1_1101_8562_12782	337	0	0	0	60	11	2	2	0	4	1	18	23	0	0	0	23	3	150	0	0	0	7	19	0	0	0	0	0	7	0	0	0	0	0	0	0	0		Bacteria;Cyanobacteria;Chloroplast;uncultured_eubacterium_WD215;uncultured_eubacterium_WD215_unclassified;uncultured_eubacterium_WD215_unclassified;uncultured_eubacterium_WD215_unclassified
HWI-M02808_115_AHB9G_1_1109_9718_19307	337	8	9	25	47	11	28	8	3	16	8	20	3	12	1	9	14	15	4	4	0	4	3	25	17	0	0	0	4	0	6	0	0	0	0	0	0	0		Bacteria;Planctomycetes;Phycisphaerae;WD2101_soil_group;uncultured_bacterium;uncultured_bacterium_unclassified;uncultured_bacterium_unclassified
HWI-M02808_115_AHB9G_1_1101_15711_13317	337	0	115	0	0	0	0	0	109	0	0	0	0	0	0	113	0	0	0	0	0	0	0	0	0	0	0	0	0	0	0	0	0	0	0	0	0	0		Bacteria;Proteobacteria;Alphaproteobacteria;Rhizobiales;Hyphomicrobiaceae;Rhodoplanes;uncultured_alpha_proteobacterium
HWI-M02808_115_AHB9G_1_1105_7657_13947	337	8	4	108	0	0	20	0	20	54	3	0	0	0	0	39	0	0	0	0	0	0	0	0	0	18	0	0	0	0	0	0	0	0	44	0	0	0		Bacteria;Armatimonadetes;Armatimonadia;Armatimonadales;Armatimonadales_unclassified;Armatimonadales_unclassified;Armatimonadales_unclassified
HWI-M02808_115_AHB9G_1_1101_24874_18427	336	0	0	0	2	0	0	0	6	0	0	15	0	0	6	32	0	17	0	0	0	1	0	3	4	0	0	95	62	80	0	0	0	0	2	0	0	0		Bacteria;Proteobacteria;Alphaproteobacteria;Rhizobiales;Xanthobacteraceae;Variibacter;Variibacter_unclassified
HWI-M02808_177_ANHM9_1_1114_11570_22482	336	0	0	7	44	0	11	38	0	0	2	0	21	0	1	56	33	0	0	0	0	6	0	0	0	35	0	2	11	4	24	5	0	5	9	4	3	0		Bacteria;Bacteroidetes;Sphingobacteriia;Sphingobacteriales;Sphingobacteriaceae;Mucilaginibacter;Mucilaginibacter_unclassified
HWI-M02808_115_AHB9G_1_1114_17548_22414	336	0	0	2	1	2	0	0	0	0	0	1	16	2	0	0	254	0	10	7	0	3	3	9	0	0	0	0	3	6	0	2	0	1	0	1	0	0	CAAT_Inhibited	Bacteria;Proteobacteria;Betaproteobacteria;Burkholderiales;Oxalobacteraceae;Massilia;Massilia_unclassified
HWI-M02808_115_AHB9G_1_1101_21485_24439	336	0	0	0	0	0	114	2	0	0	1	0	0	0	0	14	0	0	0	0	0	0	0	0	0	0	0	0	0	0	0	0	0	0	13	0	0	0		Bacteria;Acidobacteria;Acidobacteria;Acidobacteriales;Acidobacteriaceae_(Subgroup_1);Acidobacteriaceae_(Subgroup_1)_uncultured;Acidobacteriaceae_(Subgroup_1)_unclassified
HWI-M02808_177_ANHM9_1_1101_13056_7101	335	0	0	68	28	3	0	4	56	0	0	8	14	0	4	0	4	8	41	6	0	0	0	2	9	0	0	0	11	2	24	1	0	0	0	0	0	0		Bacteria;Planctomycetes;BD7-11;uncultured_bacterium;uncultured_bacterium_unclassified;uncultured_bacterium_unclassified;uncultured_bacterium_unclassified
HWI-M02808_115_AHB9G_1_1102_8357_9611	335	0	0	0	0	0	0	0	0	0	0	0	0	0	0	0	0	0	0	0	0	0	0	0	0	33	15	11	3	12	0	60	35	13	5	10	56	74		Bacteria;Acidobacteria;Acidobacteria;Acidobacteriales;Acidobacteriaceae_(Subgroup_1);Candidatus_Koribacter;Candidatus_Koribacter_unclassified
HWI-M02808_115_AHB9G_1_1111_29305_13219	334	6	0	0	0	0	0	0	0	0	0	7	5	0	1	0	46	0	2	5	0	0	0	0	0	0	12	0	7	12	11	0	96	2	0	52	49	5		Bacteria;Proteobacteria;Betaproteobacteria;Nitrosomonadales;Nitrosomonadaceae;Nitrosomonadaceae_uncultured;Nitrosomonadaceae_unclassified
HWI-M02808_115_AHB9G_1_1105_4765_11963	334	0	3	0	0	0	0	0	0	1	0	0	0	0	0	0	4	0	3	0	0	5	2	0	0	51	0	39	0	0	0	66	51	24	0	40	30	0		Bacteria;Proteobacteria;Alphaproteobacteria;Rhizobiales;Bradyrhizobiaceae;Bradyrhizobiaceae_unclassified;Bradyrhizobiaceae_unclassified
HWI-M02808_115_AHB9G_1_2107_17094_16245	333	0	0	0	0	0	0	0	0	0	0	0	0	0	0	0	0	0	0	0	0	0	0	0	0	0	0	20	0	0	0	31	0	0	0	282	0	0	Ground	Bacteria;Bacteroidetes;Sphingobacteriia;Sphingobacteriales;Sphingobacteriaceae;Mucilaginibacter;Mucilaginibacter_unclassified
HWI-M02808_115_AHB9G_1_1103_6718_24949	333	0	0	67	52	0	0	0	0	0	0	0	0	0	0	123	0	0	0	0	2	0	1	0	0	16	0	0	0	0	0	17	0	5	0	8	3	22		Bacteria;Verrucomicrobia;Spartobacteria;Chthoniobacterales;Chthoniobacteraceae;Chthoniobacter;Chthoniobacter_unclassified
HWI-M02808_115_AHB9G_1_1101_12875_2426	333	218	0	0	0	0	0	0	0	0	0	0	0	0	0	0	0	0	0	0	0	0	0	0	0	16	0	3	0	0	0	77	0	10	0	0	0	0		Bacteria;Acidobacteria;Acidobacteria;Subgroup_3;Unknown_Family;Candidatus_Solibacter;Candidatus_Solibacter_unclassified
HWI-M02808_115_AHB9G_1_1114_6202_24664	333	3	0	17	28	22	42	0	0	77	11	45	0	2	0	30	0	0	0	0	0	0	0	0	8	0	0	0	0	0	0	0	0	0	44	0	0	0		Bacteria;Proteobacteria;Alphaproteobacteria;Rhizobiales;Rhizobiales_Incertae_Sedis;Rhizomicrobium;Rhizomicrobium_unclassified
HWI-M02808_115_AHB9G_1_1111_4661_15153	333	7	0	0	0	13	0	0	0	0	0	0	5	1	0	0	1	0	56	0	49	141	15	0	0	0	0	0	0	2	0	0	0	0	0	0	0	0	CASE_Unique	Bacteria;Acidobacteria;Acidobacteria;Subgroup_4;Unknown_Family;Blastocatella;Blastocatella_unclassified
HWI-M02808_115_AHB9G_1_1101_10127_18055	333	0	0	0	0	0	0	0	0	0	0	0	0	0	0	0	0	0	0	0	0	0	0	0	0	47	22	15	0	0	0	15	60	19	0	59	53	29		Bacteria;Proteobacteria;Alphaproteobacteria;Rhodospirillales;Rhodospirillales_Incertae_Sedis;Reyranella;Reyranella_unclassified
HWI-M02808_115_AHB9G_1_2114_25398_6641	332	1	0	2	0	7	0	0	0	0	0	0	3	0	0	5	0	0	1	0	0	0	0	2	0	15	0	0	0	0	0	7	8	0	0	79	115	86		Bacteria;Firmicutes;Bacilli;Bacillales;Bacillaceae;Bacillus;Bacillus_unclassified
HWI-M02808_115_AHB9G_1_1101_20191_16735	332	0	0	0	0	0	0	0	0	0	0	0	0	0	0	0	0	0	0	0	0	0	0	0	0	38	0	22	0	6	3	118	3	23	0	85	12	18		Bacteria;Proteobacteria;Betaproteobacteria;Burkholderiales;Comamonadaceae;Comamonadaceae_unclassified;Comamonadaceae_unclassified
HWI-M02808_115_AHB9G_1_1103_11836_4824	332	0	0	0	0	0	0	0	0	0	0	0	0	0	0	0	0	0	0	0	0	0	0	0	0	10	17	0	0	0	0	56	70	58	0	27	25	60		Bacteria;Proteobacteria;Gammaproteobacteria;Xanthomonadales;Xanthomonadales_Incertae_Sedis;Xanthomonadales_Incertae_Sedis_uncultured;uncultured_bacterium
HWI-M02808_115_AHB9G_1_1102_16172_2334	332	0	0	0	2	0	5	0	0	0	0	2	4	3	5	2	74	7	18	0	52	70	18	24	5	0	0	0	0	0	2	0	0	21	0	0	0	0	CASE_Unique	Bacteria;Proteobacteria;Alphaproteobacteria;Sphingomonadales;Sphingomonadaceae;Sphingomonas;uncultured_organism
HWI-M02808_115_AHB9G_1_1103_15092_18351	332	5	9	45	0	0	0	8	0	29	35	0	0	15	0	0	0	0	0	0	0	0	0	127	0	2	1	4	2	0	0	0	2	5	4	0	0	0		Bacteria;Acidobacteria;Acidobacteria;Acidobacteriales;Acidobacteriaceae_(Subgroup_1);Granulicella;Granulicella_unclassified
HWI-M02808_115_AHB9G_1_1104_21300_13286	331	18	0	0	8	110	0	11	0	0	7	0	11	0	0	0	0	0	13	19	0	0	0	0	1	27	0	0	0	6	23	30	4	0	0	10	13	0		Bacteria;Proteobacteria;Gammaproteobacteria;Xanthomonadales;Xanthomonadaceae;Xanthomonadaceae_unclassified;Xanthomonadaceae_unclassified
HWI-M02808_177_ANHM9_1_1106_18322_4424	331	0	0	0	0	0	0	0	0	0	0	0	0	0	0	0	0	0	0	0	0	0	0	0	0	0	0	0	0	0	0	58	34	54	0	31	7	147	Ground	Bacteria;Acidobacteria;Acidobacteria;Subgroup_2;uncultured_Acidobacteria_bacterium;uncultured_Acidobacteria_bacterium_unclassified;uncultured_Acidobacteria_bacterium_unclassified
HWI-M02808_177_ANHM9_1_1112_9184_19265	331	0	0	0	0	0	0	0	0	0	0	98	0	0	0	3	0	0	0	0	0	0	0	0	194	0	0	0	15	1	6	7	0	0	0	0	0	0		Bacteria;Proteobacteria;Deltaproteobacteria;Myxococcales;Cystobacteraceae;Anaeromyxobacter;Anaeromyxobacter_unclassified
HWI-M02808_115_AHB9G_1_1101_5571_6718	330	27	0	0	0	0	3	0	0	0	0	0	46	1	6	0	27	0	24	3	18	62	18	11	0	0	0	6	9	29	8	0	8	0	0	1	3	0		Bacteria;Acidobacteria;Acidobacteria;Subgroup_3;Unknown_Family;Candidatus_Solibacter;Candidatus_Solibacter_unclassified
HWI-M02808_177_ANHM9_1_1108_2051_13482	330	0	0	0	0	0	0	0	0	0	0	0	0	0	0	0	0	0	0	0	0	0	0	0	0	109	17	0	0	0	0	68	33	0	0	0	51	52		Bacteria;Acidobacteria;Acidobacteria;Acidobacteriales;Acidobacteriaceae_(Subgroup_1);Acidobacteriaceae_(Subgroup_1)_uncultured;uncultured_Acidobacteriaceae_bacterium
HWI-M02808_115_AHB9G_1_1101_18731_4743	330	225	6	0	0	1	0	0	0	0	0	0	0	0	0	0	0	0	0	0	0	0	0	0	0	0	0	0	0	0	0	32	0	7	23	0	0	19		Bacteria;Planctomycetes;Phycisphaerae;WD2101_soil_group;uncultured_bacterium;uncultured_bacterium_unclassified;uncultured_bacterium_unclassified
HWI-M02808_177_ANHM9_1_1103_11656_12613	330	0	0	0	0	0	0	0	6	0	0	0	0	0	0	0	0	0	0	0	0	0	0	0	0	0	0	0	0	0	0	0	0	0	0	0	0	0		Bacteria;Chloroflexi;Ktedonobacteria;Ktedonobacterales;Thermosporotrichaceae;Thermosporotrichaceae_uncultured;Thermosporotrichaceae_unclassified
HWI-M02808_115_AHB9G_1_1102_21947_14993	328	0	0	4	30	29	16	6	3	121	2	8	30	10	0	52	0	0	0	0	0	0	0	0	0	0	0	0	0	0	12	0	0	0	0	0	0	0		Bacteria;Acidobacteria;Acidobacteria;Subgroup_3;Unknown_Family;Unknown_Family_unclassified;Unknown_Family_unclassified
HWI-M02808_115_AHB9G_1_1112_23189_24673	328	3	0	0	4	14	0	7	0	0	0	6	18	0	0	1	1	2	11	9	0	0	1	6	0	21	6	15	52	18	14	21	9	18	0	8	8	45		Bacteria;Acidobacteria;Acidobacteria;Acidobacteriales;Acidobacteriaceae_(Subgroup_1);Acidobacteriaceae_(Subgroup_1)_uncultured;Acidobacteriaceae_(Subgroup_1)_unclassified
HWI-M02808_115_AHB9G_1_1101_19330_23194	328	0	0	83	0	0	16	1	2	1	202	0	0	0	0	5	0	0	0	0	0	0	0	0	0	0	0	0	0	0	0	0	0	0	0	0	0	0		Bacteria;Acidobacteria;Acidobacteria;Acidobacteriales;Acidobacteriaceae_(Subgroup_1);Acidobacteriaceae_(Subgroup_1)_unclassified;Acidobacteriaceae_(Subgroup_1)_unclassified
HWI-M02808_115_AHB9G_1_1113_28635_17576	327	3	1	1	39	26	36	7	0	0	0	16	33	1	0	37	25	2	53	0	0	0	0	23	0	0	0	2	5	0	11	0	0	0	0	0	0	0		Bacteria;Planctomycetes;Planctomycetacia;Planctomycetales;Planctomycetaceae;Planctomycetaceae_uncultured;Planctomycetaceae_unclassified
HWI-M02808_115_AHB9G_1_1102_23307_13328	327	16	0	0	0	0	0	0	0	0	0	3	0	0	0	0	0	0	0	0	1	1	1	1	0	16	6	23	215	34	0	4	0	0	1	0	0	0	GRPE_Unique	Bacteria;Bacteroidetes;Sphingobacteriia;Sphingobacteriales;Chitinophagaceae;Chitinophagaceae_unclassified;Chitinophagaceae_unclassified
HWI-M02808_177_ANHM9_1_1107_10707_15047	327	0	0	0	13	57	10	17	0	0	0	3	36	31	0	3	5	7	11	51	0	0	0	5	6	0	0	0	0	0	34	0	0	0	2	0	0	0		Bacteria;Proteobacteria;Gammaproteobacteria;Xanthomonadales;Xanthomonadaceae;Xanthomonadaceae_unclassified;Xanthomonadaceae_unclassified
HWI-M02808_115_AHB9G_1_1113_17976_24551	326	0	1	0	3	17	0	14	0	0	1	4	31	6	3	7	18	10	43	9	0	10	8	83	3	0	1	5	3	7	15	0	0	0	0	0	0	0		Bacteria;Actinobacteria;Actinobacteria;Frankiales;Frankiaceae;Jatrophihabitans;uncultured_bacterium
HWI-M02808_115_AHB9G_1_1101_2746_13210	326	131	0	0	4	30	0	3	0	0	1	48	0	0	0	0	0	21	0	0	0	8	0	43	0	4	0	0	0	0	0	0	0	0	0	0	0	0		Bacteria;Actinobacteria;Thermoleophilia;Solirubrobacterales;Solirubrobacteraceae;Solirubrobacter;Solirubrobacter_unclassified
HWI-M02808_115_AHB9G_1_1101_6778_10148	325	39	0	0	2	0	0	0	0	0	0	1	73	0	20	0	0	0	34	8	0	0	0	0	0	1	0	14	0	29	58	2	0	20	0	0	0	0		Bacteria;Bacteroidetes;Sphingobacteriia;Sphingobacteriales;Chitinophagaceae;Ferruginibacter;Ferruginibacter_unclassified
HWI-M02808_177_ANHM9_1_1104_6461_13219	325	0	0	0	0	0	0	0	0	0	0	0	1	0	0	0	0	0	0	0	0	0	0	0	1	103	0	0	0	0	0	116	0	38	0	0	0	62		Bacteria;Verrucomicrobia;OPB35_soil_group;OPB35_soil_group_unclassified;OPB35_soil_group_unclassified;OPB35_soil_group_unclassified;OPB35_soil_group_unclassified
HWI-M02808_115_AHB9G_1_2103_19196_12177	325	5	0	14	6	6	0	14	0	2	0	9	4	0	0	0	0	0	0	0	0	0	0	1	0	13	6	125	3	59	15	5	0	1	0	4	2	11		Bacteria;Proteobacteria;Alphaproteobacteria;Rhizobiales;Rhizobiales_Incertae_Sedis;Rhizomicrobium;Rhizomicrobium_unclassified
HWI-M02808_115_AHB9G_1_1101_17985_16779	323	15	1	0	0	0	0	0	0	0	0	0	0	0	0	0	0	0	0	0	0	0	0	0	0	15	4	10	28	0	0	59	0	35	0	116	21	11		Bacteria;Acidobacteria;Acidobacteria;Subgroup_3;Unknown_Family;Bryobacter;uncultured_Acidobacteria_bacterium
HWI-M02808_115_AHB9G_1_1102_26626_9372	323	48	0	0	0	15	0	13	0	0	1	22	40	0	15	10	20	4	31	9	3	2	10	15	7	0	0	0	8	6	10	0	0	5	0	0	0	5		Bacteria;Proteobacteria;Alphaproteobacteria;Rhizobiales;Xanthobacteraceae;Variibacter;Variibacter_unclassified
HWI-M02808_115_AHB9G_1_1108_7309_19979	323	0	0	0	0	4	0	0	0	0	1	0	4	0	0	0	0	0	0	0	0	0	0	10	0	0	0	4	3	5	14	7	60	17	0	0	60	104	Ground	Bacteria;Proteobacteria;Gammaproteobacteria;Enterobacteriales;Enterobacteriaceae;Erwinia;Erwinia_billingiae
HWI-M02808_177_ANHM9_1_1110_18041_12561	322	0	0	0	0	0	0	0	0	0	0	0	0	0	0	0	0	0	0	0	0	0	0	0	0	0	2	82	60	121	0	12	18	0	0	0	19	0	Ground	Bacteria;Proteobacteria;Alphaproteobacteria;Rhodobacterales;Rhodobacteraceae;Rhodobacteraceae_unclassified;Rhodobacteraceae_unclassified
HWI-M02808_115_AHB9G_1_1113_13840_28192	322	2	0	0	6	5	0	6	0	0	0	2	33	0	0	11	34	15	37	9	0	6	16	49	0	0	4	0	36	20	0	0	0	9	0	2	0	8		Bacteria;Proteobacteria;Alphaproteobacteria;Caulobacterales;Caulobacteraceae;Asticcacaulis;uncultured_Asticcacaulis_sp.
HWI-M02808_115_AHB9G_1_1108_26712_9705	322	9	8	28	0	4	3	14	1	0	1	5	0	0	0	8	0	7	0	0	0	0	0	0	0	35	0	3	0	2	0	21	7	33	0	34	3	66		Bacteria;Proteobacteria;Alphaproteobacteria;Rhizobiales;Xanthobacteraceae;Xanthobacteraceae_unclassified;Xanthobacteraceae_unclassified
HWI-M02808_115_AHB9G_1_1103_24196_5891	322	11	3	1	0	0	0	7	0	0	0	265	0	0	0	0	0	0	3	0	0	0	0	0	0	0	1	4	0	0	0	0	3	0	5	3	0	4		Bacteria;Chloroflexi;Chloroflexi_uncultured;Chloroflexi_unclassified;Chloroflexi_unclassified;Chloroflexi_unclassified;Chloroflexi_unclassified
HWI-M02808_115_AHB9G_1_2105_2729_14933	322	0	0	7	80	0	0	8	0	10	7	27	41	0	4	7	33	4	17	1	0	1	0	0	5	0	0	49	0	0	3	0	0	0	0	0	0	0		Bacteria;Cyanobacteria;Cyanobacteria;SubsectionIV;FamilyI;Nostoc;uncultured_Nostoc_sp.
HWI-M02808_115_AHB9G_1_1106_8470_3685	322	0	0	0	0	0	0	0	0	0	0	0	13	0	5	18	245	0	11	8	0	0	0	0	0	0	0	0	1	16	1	0	0	0	0	0	0	0	CAAT_Inhibited	Bacteria;Proteobacteria;Alphaproteobacteria;Rickettsiales;Rickettsiaceae;Rickettsiaceae_uncultured;Rickettsiaceae_unclassified
HWI-M02808_115_AHB9G_1_1103_26381_16333	321	7	2	31	9	5	17	22	0	42	0	10	7	10	0	13	13	7	13	1	0	9	0	36	3	10	0	0	3	0	12	8	0	0	3	0	0	0		Bacteria;Acidobacteria;Acidobacteria;Acidobacteriales;Acidobacteriaceae_(Subgroup_1);Granulicella;Granulicella_unclassified
HWI-M02808_177_ANHM9_1_1113_22335_25261	321	0	4	38	39	13	21	3	1	11	4	24	1	0	0	14	6	2	15	3	0	0	0	0	15	0	1	15	9	6	16	0	0	0	15	0	0	0		Bacteria;Proteobacteria;Alphaproteobacteria;Rhizobiales;alphaI_cluster;alphaI_cluster_unclassified;alphaI_cluster_unclassified
HWI-M02808_115_AHB9G_1_1107_27062_11484	320	12	14	128	0	0	22	0	31	57	14	0	0	2	0	0	0	11	0	0	0	0	0	0	1	1	0	0	0	0	0	0	0	0	15	0	0	0		Bacteria;Verrucomicrobia;Opitutae;Opitutales;Opitutaceae;Opitutus;Opitutus_unclassified
HWI-M02808_115_AHB9G_1_2109_20691_13631	320	0	0	0	30	11	87	14	0	0	3	18	24	6	0	36	9	4	12	1	0	2	7	22	4	0	0	1	4	0	10	0	0	0	0	0	0	0		Bacteria;Acidobacteria;Acidobacteria;Acidobacteriales;Acidobacteriaceae_(Subgroup_1);Acidobacterium;Acidobacterium_unclassified
HWI-M02808_115_AHB9G_1_1103_17777_14437	319	0	0	0	0	0	0	1	0	0	0	0	0	0	0	0	0	0	0	0	0	0	0	0	0	0	13	35	0	0	0	0	96	24	0	63	51	13	Ground	Bacteria;Acidobacteria;Acidobacteria;Subgroup_5;uncultured_Acidobacteria_bacterium;uncultured_Acidobacteria_bacterium_unclassified;uncultured_Acidobacteria_bacterium_unclassified
HWI-M02808_115_AHB9G_1_1106_17190_11082	319	0	2	0	0	5	0	0	0	0	6	13	0	1	4	0	0	2	6	0	0	0	0	0	0	74	25	14	0	0	37	0	38	0	0	0	72	0		Bacteria;Proteobacteria;Alphaproteobacteria;Rhizobiales;Hyphomicrobiaceae;Pedomicrobium;Pedomicrobium_unclassified
HWI-M02808_115_AHB9G_1_1103_7482_22402	319	22	5	2	0	3	0	4	0	0	0	11	3	5	14	0	2	11	7	16	5	8	8	5	0	2	20	8	14	12	16	11	5	3	0	14	24	0		Bacteria;Actinobacteria;Thermoleophilia;Gaiellales;Gaiellales_uncultured;uncultured_bacterium;uncultured_bacterium_unclassified
HWI-M02808_115_AHB9G_1_2102_11753_17321	319	0	0	0	2	0	0	0	0	0	0	0	0	0	0	0	0	0	0	0	0	0	0	0	0	0	14	42	0	23	0	66	10	28	0	123	0	8		Bacteria;Proteobacteria;Betaproteobacteria;SC-I-84;SC-I-84_unclassified;SC-I-84_unclassified;SC-I-84_unclassified
HWI-M02808_115_AHB9G_1_1114_10847_27596	318	1	0	0	0	1	0	1	0	1	0	1	8	0	3	2	0	0	8	2	0	16	1	8	1	6	0	25	8	41	7	0	35	44	0	11	73	9		Bacteria;Proteobacteria;Betaproteobacteria;Burkholderiales;Comamonadaceae;Comamonadaceae_unclassified;Comamonadaceae_unclassified
HWI-M02808_115_AHB9G_1_1106_12294_27494	318	0	0	0	0	0	0	0	0	0	0	0	0	0	0	0	0	0	0	0	0	0	0	0	0	199	0	0	0	0	0	24	3	0	64	0	0	28	Ground	Bacteria;Bacteroidetes;Sphingobacteriia;Sphingobacteriales;Sphingobacteriaceae;Mucilaginibacter;uncultured_Bacteroidetes_bacterium
HWI-M02808_177_ANHM9_1_1104_24898_5447	317	0	14	131	0	0	0	0	92	73	0	0	0	0	0	7	0	0	0	0	0	0	0	0	0	0	0	0	0	0	0	0	0	0	0	0	0	0		Bacteria;Armatimonadetes;Armatimonadia;Armatimonadales;Armatimonadales_unclassified;Armatimonadales_unclassified;Armatimonadales_unclassified
HWI-M02808_115_AHB9G_1_1111_22872_11591	317	0	0	0	0	0	0	0	0	0	0	0	0	0	0	0	0	0	0	0	0	1	0	0	0	46	9	16	6	0	0	50	15	34	4	51	17	59		Bacteria;Proteobacteria;Alphaproteobacteria;Caulobacterales;Hyphomonadaceae;Woodsholea;Woodsholea_unclassified
HWI-M02808_115_AHB9G_1_1105_17317_13787	317	0	0	0	0	0	0	0	0	0	0	0	0	0	0	0	0	0	0	0	0	0	0	0	0	9	0	0	0	0	0	0	0	0	308	0	0	0	GRFL_Unique	Bacteria;Planctomycetes;Phycisphaerae;WD2101_soil_group;uncultured_bacterium;uncultured_bacterium_unclassified;uncultured_bacterium_unclassified
HWI-M02808_177_ANHM9_1_1102_16476_28250	316	0	0	0	39	1	0	2	0	0	0	9	0	0	0	0	73	0	0	13	0	12	7	24	0	0	1	0	0	0	0	78	0	2	0	2	34	0		Bacteria;Proteobacteria;Betaproteobacteria;Burkholderiales;Oxalobacteraceae;Massilia;Massilia_unclassified
HWI-M02808_115_AHB9G_1_1101_4184_8051	316	0	0	0	0	0	0	0	0	0	0	0	0	0	0	0	0	0	0	0	0	0	0	0	0	114	6	0	0	0	0	84	5	45	0	2	2	58		Bacteria;Proteobacteria;Alphaproteobacteria;Rhodospirillales;JG37-AG-20;JG37-AG-20_unclassified;JG37-AG-20_unclassified
HWI-M02808_177_ANHM9_1_1104_23376_8746	316	0	0	0	0	0	0	0	0	0	0	0	0	0	0	0	0	0	0	0	1	0	0	0	0	48	0	9	0	0	0	131	5	23	0	55	0	40		Bacteria;Proteobacteria;Alphaproteobacteria;Rhizobiales;KF-JG30-B3;uncultured_bacterium;uncultured_bacterium_unclassified
HWI-M02808_177_ANHM9_1_1104_15159_10861	316	0	0	2	16	6	10	20	0	0	7	2	8	7	5	3	59	45	22	6	1	17	6	29	6	0	0	7	0	10	0	0	0	0	3	0	0	0		Bacteria;Proteobacteria;Alphaproteobacteria;Rhizobiales;1174-901-12;1174-901-12_unclassified;1174-901-12_unclassified
HWI-M02808_115_AHB9G_1_1106_10422_3093	316	0	0	0	0	0	0	2	0	0	0	0	0	0	0	0	0	1	0	0	0	2	0	0	0	11	1	42	3	6	5	0	14	35	3	6	172	1	Ground	Bacteria;Bacteroidetes;Sphingobacteriia;Sphingobacteriales;Sphingobacteriaceae;Pedobacter;uncultured_organism
HWI-M02808_177_ANHM9_1_1111_8279_16832	316	0	5	0	0	0	0	0	0	0	0	0	0	0	0	0	0	1	54	0	0	0	0	0	0	0	0	135	5	81	0	0	0	0	0	0	0	0	Ground	Bacteria;Proteobacteria;Gammaproteobacteria;Xanthomonadales;Xanthomonadaceae;Rhodanobacter;Rhodanobacter_unclassified
HWI-M02808_115_AHB9G_1_1107_23256_22641	315	7	15	4	36	60	0	21	0	1	1	41	0	0	0	0	0	0	0	0	0	0	0	0	0	11	0	0	0	0	7	0	0	0	2	0	0	0		Bacteria;Actinobacteria;Actinobacteria;Micromonosporales;Micromonosporaceae;Micromonosporaceae_unclassified;Micromonosporaceae_unclassified
HWI-M02808_115_AHB9G_1_1103_9715_12018	315	41	0	0	0	0	0	27	14	0	0	0	18	0	0	0	0	0	0	0	0	0	0	0	1	0	0	0	0	1	0	26	0	24	0	93	0	22		Bacteria;Proteobacteria;Alphaproteobacteria;Rhizobiales;Hyphomicrobiaceae;Pedomicrobium;Pedomicrobium_unclassified
HWI-M02808_115_AHB9G_1_1101_16336_14365	315	8	0	1	22	63	0	48	3	27	1	75	7	0	0	6	0	0	1	5	0	0	0	0	0	0	0	5	0	0	22	0	0	0	0	0	0	0		Bacteria;Verrucomicrobia;Opitutae;Opitutales;Opitutaceae;Opitutus;uncultured_bacterium
HWI-M02808_115_AHB9G_1_1102_11335_6465	315	98	0	0	0	0	0	0	0	0	0	0	0	0	0	0	0	0	74	0	0	0	0	0	0	1	28	14	59	0	14	5	0	19	0	0	3	0		Bacteria;Verrucomicrobia;Opitutae;Opitutales;Opitutaceae;Opitutus;Opitutus_unclassified
HWI-M02808_115_AHB9G_1_1101_9815_5019	315	23	2	28	25	0	12	30	0	16	1	39	0	0	0	43	7	5	31	10	0	0	0	1	2	0	0	5	2	0	20	0	0	0	0	0	0	1		Bacteria;Proteobacteria;Alphaproteobacteria;Rhizobiales;Rhizobiales_Incertae_Sedis;Rhizomicrobium;Rhizomicrobium_unclassified
HWI-M02808_177_ANHM9_1_1106_8213_18031	314	0	18	37	0	113	43	0	3	42	13	0	0	0	0	20	0	0	0	0	0	0	0	0	0	0	0	0	0	0	0	0	0	0	0	0	0	0		Bacteria;Proteobacteria;Gammaproteobacteria;Xanthomonadales;Xanthomonadales_uncultured;uncultured_eubacterium_WD260;uncultured_eubacterium_WD260_unclassified
HWI-M02808_177_ANHM9_1_2104_24189_15415	314	0	0	1	63	22	0	0	0	9	0	16	3	0	0	16	27	10	7	1	2	13	0	112	1	0	0	4	0	0	1	0	0	0	0	0	0	0		Bacteria;Proteobacteria;Alphaproteobacteria;Rickettsiales;Mitochondria;Mitochondria_unclassified;Mitochondria_unclassified
HWI-M02808_115_AHB9G_1_2103_20277_11094	314	6	0	0	2	0	0	8	0	0	0	0	11	0	0	0	0	5	4	0	2	13	0	8	0	1	13	31	42	67	7	12	18	9	3	19	19	2		Bacteria;Actinobacteria;Actinobacteria;Micrococcales;Cellulomonadaceae;Cellulomonas;uncultured_bacterium
HWI-M02808_115_AHB9G_1_1103_22688_15488	314	0	0	0	0	0	0	0	0	0	0	0	0	0	0	0	0	0	0	0	0	0	0	0	0	39	68	12	10	12	8	51	22	26	0	14	12	23	Ground	Bacteria;Proteobacteria;Alphaproteobacteria;Rhodospirillales;Rhodospirillaceae;Dongia;Dongia_unclassified
HWI-M02808_115_AHB9G_1_1105_14071_15951	313	2	0	76	11	12	31	10	3	23	4	10	39	8	0	27	0	5	6	0	0	0	0	6	0	0	0	0	6	8	4	4	3	0	0	0	0	0		Bacteria;Verrucomicrobia;Verrucomicrobia_Incertae_Sedis;Unknown_Order;Unknown_Family;Candidatus_Methylacidiphilum;uncultured_bacterium
HWI-M02808_115_AHB9G_1_1102_10512_10505	313	39	1	0	1	9	0	41	0	0	0	0	10	0	10	0	8	0	21	6	0	0	0	32	0	0	0	22	0	19	66	0	1	2	0	0	0	0		Bacteria;Proteobacteria;Gammaproteobacteria;Xanthomonadales;Xanthomonadales_Incertae_Sedis;Acidibacter;Acidibacter_unclassified
HWI-M02808_115_AHB9G_1_2109_21731_25547	312	0	0	0	0	0	0	2	0	0	0	0	2	0	12	1	63	0	16	1	0	10	0	3	0	0	0	0	0	1	0	194	0	5	0	0	0	0	CAAT_Inhibited	Bacteria;Proteobacteria;Betaproteobacteria;Burkholderiales;Oxalobacteraceae;Massilia;Massilia_unclassified
HWI-M02808_177_ANHM9_1_1109_7716_19772	311	0	0	270	0	0	0	0	0	41	0	0	0	0	0	0	0	0	0	0	0	0	0	0	0	0	0	0	0	0	0	0	0	0	0	0	0	0		Bacteria;Actinobacteria;Thermoleophilia;Solirubrobacterales;YNPFFP1;uncultured_bacterium;uncultured_bacterium_unclassified
HWI-M02808_115_AHB9G_1_1105_19150_3143	311	12	0	0	24	37	0	3	0	0	0	35	13	1	2	0	3	1	18	0	0	2	4	71	0	0	1	19	0	39	10	3	0	0	0	0	0	0		Bacteria;Planctomycetes;Planctomycetacia;Planctomycetales;Planctomycetaceae;Planctomycetaceae_uncultured;Planctomycetaceae_unclassified
HWI-M02808_115_AHB9G_1_1101_12498_13923	311	94	0	0	1	67	0	0	0	0	0	45	29	7	0	5	0	0	0	10	0	1	0	4	0	0	0	0	0	0	11	0	0	0	0	0	0	0		Bacteria;Actinobacteria;Thermoleophilia;Solirubrobacterales;Solirubrobacterales_unclassified;Solirubrobacterales_unclassified;Solirubrobacterales_unclassified
HWI-M02808_115_AHB9G_1_2103_18123_12849	311	0	0	0	0	0	0	0	0	0	0	0	0	0	0	0	0	0	0	0	0	0	0	0	0	0	0	2	0	0	0	0	1	0	0	15	292	0		Bacteria;Proteobacteria;Gammaproteobacteria;Pseudomonadales;Pseudomonadaceae;Pseudomonas;Pseudomonas_cichorii
HWI-M02808_115_AHB9G_1_1101_16116_2223	311	311	0	0	0	0	0	0	0	0	0	0	0	0	0	0	0	0	0	0	0	0	0	0	0	0	0	0	0	0	0	0	0	0	0	0	0	0		Bacteria;Proteobacteria;Alphaproteobacteria;Rhizobiales;Rhizobiales_Incertae_Sedis;Rhizomicrobium;Rhizomicrobium_unclassified
HWI-M02808_115_AHB9G_1_1107_11937_13862	311	3	87	6	0	0	0	4	63	0	0	0	0	0	0	7	0	0	0	0	0	0	0	0	0	4	0	0	0	0	0	1	0	0	86	0	0	0		Bacteria;Acidobacteria;Acidobacteria;Acidobacteriales;Acidobacteriaceae_(Subgroup_1);Acidobacteriaceae_(Subgroup_1)_uncultured;Acidobacteriaceae_(Subgroup_1)_unclassified
HWI-M02808_115_AHB9G_1_2101_26038_23564	310	16	0	0	0	12	0	11	0	0	0	6	9	0	4	13	6	1	16	5	8	11	4	0	3	30	5	17	24	21	7	5	28	3	0	6	3	11		Bacteria;Proteobacteria;Deltaproteobacteria;Myxococcales;Myxococcales_uncultured;uncultured_delta_proteobacterium;uncultured_delta_proteobacterium_unclassified
HWI-M02808_115_AHB9G_1_1102_26616_19744	310	5	0	0	1	4	1	32	0	0	0	3	19	0	2	20	13	10	20	3	0	1	0	83	0	0	1	15	8	11	37	0	0	0	4	0	0	0		Bacteria;Proteobacteria;Gammaproteobacteria;Xanthomonadales;Xanthomonadales_Incertae_Sedis;Acidibacter;Acidibacter_unclassified
HWI-M02808_177_ANHM9_1_1102_25710_15690	310	0	3	0	4	6	0	14	0	0	0	0	12	61	0	2	83	1	30	13	0	1	0	8	1	0	0	8	0	17	0	0	3	0	0	0	6	4	CAAT_Inhibited	Bacteria;Proteobacteria;Betaproteobacteria;Burkholderiales;Oxalobacteraceae;Oxalobacteraceae_unclassified;Oxalobacteraceae_unclassified
HWI-M02808_115_AHB9G_1_1113_4939_19389	310	0	0	0	0	10	0	47	0	0	0	27	31	0	7	0	6	12	41	15	0	0	0	16	9	0	0	6	2	7	0	38	0	0	0	2	0	0		Bacteria;Proteobacteria;Alphaproteobacteria;Rhodospirillales;Acetobacteraceae;Acetobacteraceae_unclassified;Acetobacteraceae_unclassified
HWI-M02808_115_AHB9G_1_1101_14630_2586	310	15	1	0	7	0	0	32	0	0	0	3	18	0	3	0	5	0	63	9	3	0	0	0	4	3	2	0	2	0	52	1	19	15	1	0	24	0		Bacteria;Actinobacteria;Actinobacteria;Frankiales;Cryptosporangiaceae;Cryptosporangium;Cryptosporangium_japonicum
HWI-M02808_115_AHB9G_1_1101_5463_18939	309	0	0	37	72	5	27	0	1	7	0	0	0	36	0	45	0	13	0	10	0	0	0	0	1	0	0	5	0	0	12	0	0	0	0	0	0	0		Bacteria;Proteobacteria;Gammaproteobacteria;Xanthomonadales;Xanthomonadaceae;Xanthomonadaceae_unclassified;Xanthomonadaceae_unclassified
HWI-M02808_115_AHB9G_1_1103_13078_9897	309	0	0	23	185	7	13	16	0	5	0	9	1	0	0	10	4	0	0	0	0	0	0	5	0	0	0	0	0	1	24	0	0	0	0	0	0	0		Bacteria;Bacteroidetes;Sphingobacteriia;Sphingobacteriales;Sphingobacteriaceae;Mucilaginibacter;Mucilaginibacter_unclassified
HWI-M02808_177_ANHM9_1_1104_9926_3850	309	0	14	105	5	0	66	0	0	0	0	0	0	0	0	67	5	0	0	8	0	0	0	0	18	0	0	0	0	0	0	0	0	0	0	0	0	0		Bacteria;Proteobacteria;Deltaproteobacteria;Myxococcales;Polyangiaceae;Sorangium;Sorangium_unclassified
HWI-M02808_115_AHB9G_1_1101_13238_3919	308	0	0	0	0	0	0	0	0	0	0	0	0	0	0	0	0	0	0	0	0	0	0	0	0	76	0	0	0	0	0	51	2	0	141	4	0	34	Ground	Bacteria;Proteobacteria;Alphaproteobacteria;Rhodospirillales;JG37-AG-20;JG37-AG-20_unclassified;JG37-AG-20_unclassified
HWI-M02808_115_AHB9G_1_1101_6436_11002	308	0	0	0	0	0	0	0	0	0	0	0	0	0	0	0	0	0	0	0	0	0	0	0	0	31	19	0	0	0	0	21	34	49	0	101	12	40		Bacteria;Proteobacteria;Gammaproteobacteria;Xanthomonadales;Xanthomonadales_uncultured;Xanthomonadales_unclassified;Xanthomonadales_unclassified
HWI-M02808_115_AHB9G_1_1101_28060_18996	307	0	0	0	0	0	0	0	0	0	0	5	4	0	0	0	0	0	22	1	0	4	0	12	0	17	20	15	51	5	14	54	0	26	0	43	0	2		Bacteria;Proteobacteria;Alphaproteobacteria;Caulobacterales;Hyphomonadaceae;Hirschia;uncultured_bacterium
HWI-M02808_115_AHB9G_1_1102_20366_10463	306	58	0	0	0	0	0	0	0	0	0	5	0	0	0	0	0	0	0	0	0	0	0	0	0	13	0	0	166	0	35	7	0	5	0	0	0	0	Ground	Bacteria;Proteobacteria;Gammaproteobacteria;Xanthomonadales;Xanthomonadales_Incertae_Sedis;Acidibacter;Acidibacter_unclassified
HWI-M02808_115_AHB9G_1_1103_18578_2024	306	29	5	0	4	78	3	19	0	0	6	12	23	7	3	10	0	0	26	13	0	3	7	21	0	0	0	0	0	3	8	0	0	0	2	0	0	0		Bacteria;Planctomycetes;Phycisphaerae;WD2101_soil_group;WD2101_soil_group_unclassified;WD2101_soil_group_unclassified;WD2101_soil_group_unclassified
HWI-M02808_115_AHB9G_1_1102_25380_15338	305	6	2	11	10	36	85	3	0	28	2	7	0	0	0	34	0	0	0	0	0	0	0	0	2	0	0	0	0	0	3	0	0	0	51	0	0	0		Bacteria;Acidobacteria;Acidobacteria;Acidobacteriales;Acidobacteriaceae_(Subgroup_1);Candidatus_Koribacter;uncultured_bacterium
HWI-M02808_177_ANHM9_1_1105_9912_20288	304	0	4	33	20	10	13	6	0	9	4	15	9	5	0	6	13	8	4	3	0	4	4	23	3	1	0	6	8	1	22	2	0	6	32	0	0	0		Bacteria;Proteobacteria;Alphaproteobacteria;Rhizobiales;alphaI_cluster;uncultured_bacterium;uncultured_bacterium_unclassified
HWI-M02808_115_AHB9G_1_1101_8260_15781	304	81	29	23	0	11	0	0	0	16	0	0	0	5	3	0	0	0	0	0	0	0	0	0	0	0	0	0	0	0	0	0	0	0	0	65	0	13		Bacteria;Proteobacteria;Alphaproteobacteria;Rhodospirillales;Rhodospirillales_Incertae_Sedis;Reyranella;Reyranella_unclassified
HWI-M02808_177_ANHM9_1_1112_15418_16005	304	0	0	14	8	13	8	17	1	3	11	19	11	7	0	26	4	8	8	4	1	2	1	35	11	3	0	6	12	10	12	1	0	2	4	1	4	7		Bacteria;Proteobacteria;Alphaproteobacteria;Caulobacterales;Caulobacteraceae;Asticcacaulis;Asticcacaulis_unclassified
HWI-M02808_177_ANHM9_1_1105_13554_20574	304	0	0	0	0	0	0	0	0	0	0	0	0	0	0	0	0	0	0	0	0	0	0	0	0	0	3	78	0	62	0	58	13	21	0	45	23	0		Bacteria;Bacteroidetes;Sphingobacteriia;Sphingobacteriales;Sphingobacteriaceae;Mucilaginibacter;Mucilaginibacter_unclassified
HWI-M02808_115_AHB9G_1_1102_18705_2944	303	12	0	0	0	29	2	83	0	0	0	0	10	1	2	0	0	0	33	4	0	0	0	21	0	0	2	40	0	0	40	14	1	0	0	0	0	0		Bacteria;Bacteroidetes;Sphingobacteriia;Sphingobacteriales;Chitinophagaceae;Chitinophagaceae_unclassified;Chitinophagaceae_unclassified
HWI-M02808_115_AHB9G_1_1105_6680_18096	303	0	0	0	0	0	0	0	0	0	0	0	0	0	0	0	0	0	0	0	0	0	0	0	0	14	31	31	14	31	0	25	38	7	0	34	53	0		Bacteria;Chloroflexi;KD4-96;KD4-96_unclassified;KD4-96_unclassified;KD4-96_unclassified;KD4-96_unclassified
HWI-M02808_115_AHB9G_1_1106_18076_26519	302	0	0	0	0	0	0	0	0	0	0	0	0	0	0	0	0	0	0	0	0	0	0	0	0	70	10	14	0	0	0	73	14	0	0	109	12	0		Bacteria;Proteobacteria;Alphaproteobacteria;Rhizobiales;Xanthobacteraceae;Xanthobacteraceae_unclassified;Xanthobacteraceae_unclassified
HWI-M02808_177_ANHM9_1_1104_10927_12625	301	0	0	0	0	0	0	0	0	0	0	0	0	0	0	0	0	0	0	0	0	0	0	0	0	0	12	124	0	62	0	9	20	0	0	29	25	3		Bacteria;Proteobacteria;Betaproteobacteria;Nitrosomonadales;Nitrosomonadaceae;Nitrosomonadaceae_uncultured;uncultured_soil_bacterium
HWI-M02808_115_AHB9G_1_1102_13671_18801	301	21	0	0	11	50	0	29	0	1	0	10	9	0	15	0	6	0	1	0	32	1	7	3	0	0	0	4	17	9	27	0	0	0	0	0	0	0		Bacteria;Chloroflexi;Anaerolineae;Anaerolineales;Anaerolineaceae;Anaerolineaceae_uncultured;uncultured_Gemmatimonadetes_bacterium
HWI-M02808_115_AHB9G_1_2110_10338_13578	301	3	0	0	32	28	5	7	0	0	3	8	0	28	3	77	2	1	6	0	0	0	0	0	36	0	0	0	11	0	20	0	0	0	0	0	0	0		Bacteria;Chloroflexi;Anaerolineae;Anaerolineales;Anaerolineaceae;Anaerolineaceae_uncultured;uncultured_Gemmatimonadetes_bacterium
HWI-M02808_115_AHB9G_1_1112_26577_6561	300	10	0	0	0	0	0	15	0	0	0	0	0	0	0	0	0	0	0	0	0	0	0	0	0	22	7	20	6	10	0	35	12	20	11	62	32	19		Bacteria;Acidobacteria;Acidobacteria;Subgroup_3;Unknown_Family;Candidatus_Solibacter;Candidatus_Solibacter_unclassified
HWI-M02808_115_AHB9G_1_1114_6836_18333	300	0	0	0	1	0	0	0	0	0	0	0	29	5	0	5	10	6	36	6	29	98	42	7	0	0	0	0	0	4	0	0	0	0	0	0	0	0	CASE_Unique	Bacteria;Acidobacteria;Acidobacteria;Subgroup_4;Unknown_Family;Aridibacter;uncultured_bacterium
HWI-M02808_115_AHB9G_1_1112_6147_12742	299	1	0	2	13	17	19	6	0	0	0	26	19	0	0	24	0	0	68	0	0	0	0	42	0	1	1	4	2	10	31	0	0	0	11	0	0	0		Bacteria;Acidobacteria;Acidobacteria;Subgroup_3;Unknown_Family;Bryobacter;Bryobacter_unclassified
HWI-M02808_177_ANHM9_1_1102_12852_13265	299	0	15	0	0	0	0	284	0	0	0	0	0	0	0	0	0	0	0	0	0	0	0	0	0	0	0	0	0	0	0	0	0	0	0	0	0	0		Bacteria;Verrucomicrobia;OPB35_soil_group;OPB35_soil_group_unclassified;OPB35_soil_group_unclassified;OPB35_soil_group_unclassified;OPB35_soil_group_unclassified
HWI-M02808_115_AHB9G_1_1101_24126_22568	298	0	0	1	127	11	0	2	0	0	0	13	12	0	0	6	62	0	9	0	2	19	1	26	0	0	0	0	0	1	0	0	0	0	0	0	0	0		Bacteria;Cyanobacteria;Chloroplast;Chloroplast_unclassified;Chloroplast_unclassified;Chloroplast_unclassified;Chloroplast_unclassified
HWI-M02808_115_AHB9G_1_1110_23970_17100	298	9	0	0	7	7	0	3	0	0	0	4	17	4	3	12	43	1	0	3	11	21	10	42	0	0	0	2	26	23	6	2	7	6	0	0	4	0		Bacteria;Verrucomicrobia;Opitutae;Opitutales;Opitutaceae;Opitutus;Opitutus_unclassified
HWI-M02808_115_AHB9G_1_1107_6157_18942	298	0	0	0	0	0	1	11	0	0	1	2	18	6	11	0	15	6	31	10	17	56	0	6	1	1	1	23	14	9	12	0	0	0	0	0	16	0		Bacteria;Proteobacteria;Alphaproteobacteria;Rhizobiales;Bradyrhizobiaceae;Bradyrhizobiaceae_unclassified;Bradyrhizobiaceae_unclassified
HWI-M02808_115_AHB9G_1_1106_20112_25753	298	9	1	0	0	3	0	0	0	0	0	26	7	0	15	0	1	4	0	3	1	13	7	10	0	1	16	9	19	57	20	3	14	0	0	9	28	3		Bacteria;Acidobacteria;Acidobacteria;Subgroup_6;Subgroup_6_unclassified;Subgroup_6_unclassified;Subgroup_6_unclassified
HWI-M02808_177_ANHM9_1_2106_5564_11325	298	0	0	2	15	13	2	0	0	0	5	0	0	20	5	15	12	13	19	13	6	20	16	29	23	0	0	0	2	0	2	0	0	0	3	0	0	0	CASE_Unique	Bacteria;Proteobacteria;Alphaproteobacteria;Rhodospirillales;Acetobacteraceae;Acetobacteraceae_uncultured;uncultured_soil_bacterium
HWI-M02808_115_AHB9G_1_1101_12129_12843	297	124	0	0	0	84	0	0	0	0	0	0	10	0	0	0	0	0	24	3	0	0	0	0	0	0	0	0	0	9	40	1	0	0	0	0	0	0		Bacteria;Actinobacteria;Actinobacteria;Pseudonocardiales;Pseudonocardiaceae;Pseudonocardia;uncultured_bacterium
HWI-M02808_115_AHB9G_1_1103_11072_8609	297	0	0	0	0	0	0	0	0	0	0	0	0	0	0	2	0	0	0	18	27	178	11	29	0	0	0	7	0	0	0	0	0	0	0	0	0	0	CASE_Unique	Bacteria;Actinobacteria;Actinobacteria;Kineosporiales;Kineosporiaceae;Kineosporia;Kineosporia_unclassified
HWI-M02808_115_AHB9G_1_1102_8961_10589	297	0	0	0	0	0	0	0	0	0	0	0	0	0	0	0	0	0	0	0	0	0	0	0	0	3	7	88	9	111	0	5	23	9	0	14	15	1		Bacteria;Actinobacteria;Actinobacteria;Micrococcales;Demequinaceae;Demequina;uncultured_bacterium
HWI-M02808_115_AHB9G_1_1110_14195_8702	297	7	0	0	0	7	0	12	1	4	0	3	14	0	1	25	2	9	0	0	0	0	0	5	0	19	10	16	1	18	36	13	14	17	18	20	0	5		Bacteria;Proteobacteria;Deltaproteobacteria;Myxococcales;Polyangiaceae;Byssovorax;uncultured_bacterium
HWI-M02808_115_AHB9G_1_2109_27171_9489	297	1	0	0	1	7	118	0	0	0	0	2	9	0	0	159	0	0	0	0	0	0	0	0	0	0	0	0	0	0	0	0	0	0	0	0	0	0		Bacteria;Verrucomicrobia;OPB35_soil_group;OPB35_soil_group_unclassified;OPB35_soil_group_unclassified;OPB35_soil_group_unclassified;OPB35_soil_group_unclassified
HWI-M02808_115_AHB9G_1_1106_24166_11705	296	3	0	17	30	17	0	0	0	0	0	24	55	0	5	0	14	0	20	2	0	21	2	26	0	6	4	12	20	4	0	0	0	0	0	0	0	1		Bacteria;Proteobacteria;Alphaproteobacteria;Rhizobiales;Bradyrhizobiaceae;Bradyrhizobiaceae_unclassified;Bradyrhizobiaceae_unclassified
HWI-M02808_115_AHB9G_1_2101_17213_8239	296	0	0	0	11	6	0	0	0	0	0	1	0	9	0	0	0	0	0	0	0	0	0	126	0	0	0	38	0	6	7	0	71	0	0	0	0	0		Bacteria;Proteobacteria;Gammaproteobacteria;Pseudomonadales;Pseudomonadaceae;Pseudomonas;Pseudomonas_viridiflava
HWI-M02808_115_AHB9G_1_1104_7598_4319	295	19	0	0	0	0	5	0	0	0	0	0	15	10	9	0	11	0	3	9	24	19	11	3	0	4	0	14	21	21	32	3	10	0	0	0	18	0		Bacteria;Proteobacteria;Alphaproteobacteria;Rhizobiales;Phyllobacteriaceae;Phyllobacteriaceae_unclassified;Phyllobacteriaceae_unclassified
HWI-M02808_115_AHB9G_1_2105_10723_25330	295	1	1	0	60	30	38	21	0	68	4	48	0	0	0	0	0	0	0	0	0	0	0	0	7	0	0	0	0	0	1	0	0	0	0	0	0	0		Bacteria;Acidobacteria;Acidobacteria;Acidobacteriales;Acidobacteriaceae_(Subgroup_1);Acidobacteriaceae_(Subgroup_1)_unclassified;Acidobacteriaceae_(Subgroup_1)_unclassified
HWI-M02808_177_ANHM9_1_1103_24675_15869	295	0	4	6	11	4	7	14	0	2	21	10	15	17	0	18	11	0	14	17	1	0	0	27	13	2	0	2	6	0	9	1	0	0	7	0	0	0		Bacteria;Proteobacteria;Alphaproteobacteria;Rhodospirillales;DA111;DA111_unclassified;DA111_unclassified
HWI-M02808_115_AHB9G_1_2101_13011_24259	295	0	0	4	0	0	9	1	8	0	0	0	0	0	0	8	0	0	0	0	0	0	0	0	2	0	0	0	0	0	2	0	0	1	226	0	0	27	Ground	Bacteria;Acidobacteria;Acidobacteria;Subgroup_3;Unknown_Family;Candidatus_Solibacter;Candidatus_Solibacter_unclassified
HWI-M02808_115_AHB9G_1_1101_13880_20928	294	0	0	10	59	40	20	8	0	11	5	31	14	8	0	13	9	4	12	2	0	0	0	9	29	0	0	0	0	0	0	0	0	0	0	0	0	0		Bacteria;Proteobacteria;Alphaproteobacteria;Rhizobiales;Rhizobiales_unclassified;Rhizobiales_unclassified;Rhizobiales_unclassified
HWI-M02808_115_AHB9G_1_1101_16411_23248	293	3	9	0	0	35	0	18	0	0	0	9	1	0	0	0	0	0	0	0	0	0	0	0	0	41	0	2	11	6	50	19	9	21	7	7	0	30		Bacteria;Planctomycetes;Planctomycetacia;Planctomycetales;Planctomycetaceae;Planctomycetaceae_uncultured;Planctomycetaceae_unclassified
HWI-M02808_115_AHB9G_1_1106_25470_8390	293	0	0	0	0	0	0	0	0	0	0	0	13	0	0	6	0	0	4	5	33	154	21	0	0	0	0	29	0	0	0	0	0	0	0	0	0	0	CAAT_Inhibited	Bacteria;Bacteroidetes;Sphingobacteriia;Sphingobacteriales;Chitinophagaceae;Chitinophagaceae_uncultured;uncultured_Chitinophaga_sp.
HWI-M02808_115_AHB9G_1_1111_8460_20756	292	0	0	4	12	0	117	0	0	115	4	28	6	0	0	4	0	0	0	0	0	0	0	0	0	0	0	1	0	0	0	0	0	0	0	1	0	0		Bacteria;Planctomycetes;Planctomycetacia;Planctomycetales;Planctomycetaceae;Planctomycetaceae_uncultured;Planctomycetaceae_unclassified
HWI-M02808_115_AHB9G_1_1102_16463_7105	292	14	0	0	3	30	0	36	0	0	0	8	4	7	11	2	0	3	13	13	0	0	1	41	0	3	0	27	5	5	20	0	0	0	0	0	0	0		Bacteria;Proteobacteria;Alphaproteobacteria;Rhizobiales;JG34-KF-361;JG34-KF-361_unclassified;JG34-KF-361_unclassified
HWI-M02808_115_AHB9G_1_2102_26752_8130	292	2	0	0	2	3	0	3	0	0	0	0	5	0	0	0	0	0	5	0	4	10	1	0	0	8	14	35	32	43	0	0	13	97	2	5	0	1	Ground	Bacteria;Proteobacteria;Gammaproteobacteria;Xanthomonadales;Xanthomonadaceae;Dokdonella;uncultured_gamma_proteobacterium
HWI-M02808_115_AHB9G_1_1101_6312_23398	291	62	0	0	6	28	0	20	0	0	0	59	7	3	0	0	0	2	44	3	0	0	3	0	0	1	0	7	0	3	7	0	8	0	0	1	0	10		Bacteria;Bacteroidetes;Sphingobacteriia;Sphingobacteriales;Chitinophagaceae;Sediminibacterium;Sediminibacterium_unclassified
HWI-M02808_115_AHB9G_1_1101_8175_6205	291	203	0	0	0	0	0	0	0	0	0	0	0	0	0	0	0	0	2	0	0	0	0	0	0	11	0	0	0	0	0	4	3	4	0	0	57	1		Bacteria;Chloroflexi;Chloroflexi_uncultured;Chloroflexi_unclassified;Chloroflexi_unclassified;Chloroflexi_unclassified;Chloroflexi_unclassified
HWI-M02808_177_ANHM9_1_1108_5347_20877	291	0	0	0	0	0	0	0	0	0	0	0	0	0	0	0	0	0	0	0	0	0	0	0	0	0	13	0	0	0	0	83	6	52	30	9	7	78		Bacteria;Proteobacteria;Alphaproteobacteria;Rhodospirillales;JG37-AG-20;uncultured_bacterium;uncultured_bacterium_unclassified
HWI-M02808_177_ANHM9_1_1104_19394_13184	291	0	0	16	37	2	17	8	0	0	16	0	12	5	6	11	20	14	11	8	0	6	2	25	31	0	0	0	0	11	0	0	0	0	0	0	0	0		Bacteria;WD272;uncultured_bacterium;uncultured_bacterium_unclassified;uncultured_bacterium_unclassified;uncultured_bacterium_unclassified;uncultured_bacterium_unclassified
HWI-M02808_115_AHB9G_1_1104_12518_7681	291	9	3	18	33	26	15	13	1	23	15	24	0	4	0	5	0	0	0	1	0	0	0	0	5	10	4	4	0	0	3	2	0	10	9	7	5	8		Bacteria;Proteobacteria;Alphaproteobacteria;Rhodospirillales;Acetobacteraceae;Acetobacteraceae_uncultured;Acetobacteraceae_unclassified
HWI-M02808_115_AHB9G_1_1105_5427_19843	291	4	1	1	23	26	0	28	0	0	0	0	16	0	0	5	70	0	11	0	0	10	5	33	0	10	0	9	0	0	8	0	0	18	0	0	0	0		Bacteria;Acidobacteria;Acidobacteria;Acidobacteriales;Acidobacteriaceae_(Subgroup_1);Granulicella;Granulicella_unclassified
HWI-M02808_177_ANHM9_1_1108_11715_10680	291	0	0	0	0	9	24	5	0	0	1	17	5	0	0	225	0	0	0	0	0	0	0	0	0	0	0	0	0	0	0	1	0	0	0	0	0	0		Bacteria;Verrucomicrobia;Spartobacteria;Chthoniobacterales;DA101_soil_group;uncultured_Verrucomicrobia_bacterium;uncultured_Verrucomicrobia_bacterium_unclassified
HWI-M02808_115_AHB9G_1_1106_11737_16457	290	2	0	3	22	25	19	17	0	6	0	21	9	3	0	22	0	0	14	1	0	1	0	28	10	5	0	2	1	8	16	0	6	4	7	12	0	1		Bacteria;Proteobacteria;Alphaproteobacteria;Rhizobiales;alphaI_cluster;uncultured_forest_soil_bacterium;uncultured_forest_soil_bacterium_unclassified
HWI-M02808_115_AHB9G_1_1102_17635_7083	290	14	0	0	0	0	0	0	0	0	0	0	2	0	0	0	10	0	0	0	12	14	0	25	0	4	8	53	0	80	0	8	21	7	0	14	15	0		Bacteria;Proteobacteria;Betaproteobacteria;SC-I-84;SC-I-84_unclassified;SC-I-84_unclassified;SC-I-84_unclassified
HWI-M02808_115_AHB9G_1_1111_6966_16185	290	5	16	58	0	0	60	10	17	22	6	5	0	0	0	10	0	0	0	0	0	0	0	0	0	9	0	0	0	0	1	4	0	0	37	0	0	0		Bacteria;Acidobacteria;Acidobacteria;Subgroup_2;Subgroup_2_unclassified;Subgroup_2_unclassified;Subgroup_2_unclassified
HWI-M02808_115_AHB9G_1_1102_7014_18407	290	0	0	0	0	0	0	0	0	0	0	0	0	0	0	0	0	0	0	0	0	0	0	0	0	61	7	11	0	0	0	37	52	18	0	34	7	56		Bacteria;Proteobacteria;Betaproteobacteria;Nitrosomonadales;Nitrosomonadaceae;Nitrosomonadaceae_uncultured;Nitrosomonadaceae_unclassified
HWI-M02808_115_AHB9G_1_1103_19978_13009	290	15	0	0	0	44	1	34	0	0	0	10	6	0	4	3	2	3	67	7	0	2	1	11	0	0	0	13	0	10	3	0	1	0	0	0	0	0		Bacteria;Proteobacteria;Deltaproteobacteria;Myxococcales;Phaselicystidaceae;Phaselicystis;uncultured_bacterium
HWI-M02808_115_AHB9G_1_1104_16594_18590	289	0	0	0	0	0	0	0	0	0	0	0	0	0	0	0	0	0	0	0	0	0	0	0	0	5	5	1	0	1	0	14	32	28	60	30	9	98		Bacteria;Proteobacteria;Gammaproteobacteria;Xanthomonadales;Xanthomonadales_Incertae_Sedis;Acidibacter;Acidibacter_unclassified
HWI-M02808_115_AHB9G_1_1101_9292_22440	289	0	0	0	5	21	0	48	1	1	0	0	7	16	1	52	2	0	72	3	0	0	0	1	5	0	0	0	0	5	0	0	0	0	0	0	0	0		Bacteria;Actinobacteria;Actinobacteria;Micromonosporales;Micromonosporaceae;Micromonosporaceae_unclassified;Micromonosporaceae_unclassified
HWI-M02808_115_AHB9G_1_1102_9855_21933	289	16	0	0	0	0	0	1	0	0	0	1	14	4	0	6	6	5	5	0	21	155	18	0	1	0	0	9	0	4	13	0	0	0	0	0	0	0	CASE_Unique	Bacteria;Acidobacteria;Acidobacteria;Subgroup_3;Unknown_Family;Bryobacter;Bryobacter_unclassified
HWI-M02808_115_AHB9G_1_1103_14099_2423	288	1	0	0	0	0	0	16	0	0	0	0	26	0	3	47	11	5	19	8	0	3	0	75	0	44	4	0	7	0	0	0	0	0	11	0	0	2		Bacteria;Acidobacteria;Acidobacteria;Subgroup_3;Unknown_Family;Candidatus_Solibacter;Candidatus_Solibacter_unclassified
HWI-M02808_177_ANHM9_1_2111_21942_16155	288	0	1	0	0	0	0	4	0	0	0	0	0	0	0	0	1	0	0	0	0	0	0	0	0	9	10	11	18	11	4	21	48	12	1	24	75	24		Bacteria;Actinobacteria;Acidimicrobiia;Acidimicrobiales;Acidimicrobiales_unclassified;Acidimicrobiales_unclassified;Acidimicrobiales_unclassified
HWI-M02808_115_AHB9G_1_1101_20370_10447	288	139	37	0	0	0	0	0	0	0	3	0	0	0	0	0	0	0	0	0	0	0	0	0	0	58	0	0	0	0	3	0	0	0	0	0	0	0		Bacteria;Proteobacteria;Gammaproteobacteria;Xanthomonadales;Xanthomonadaceae;Rhodanobacter;Rhodanobacter_unclassified
HWI-M02808_115_AHB9G_1_1109_14920_16447	288	0	0	0	0	0	0	6	0	0	0	0	0	0	0	35	0	0	34	0	9	0	0	167	0	0	0	0	0	0	0	0	0	0	0	0	0	0	CAAT_Inhibited	Bacteria;Cyanobacteria;Chloroplast;Chloroplast_unclassified;Chloroplast_unclassified;Chloroplast_unclassified;Chloroplast_unclassified
HWI-M02808_115_AHB9G_1_1107_11517_12512	288	2	0	0	0	0	0	0	0	0	0	0	31	0	9	3	22	0	0	0	0	25	16	12	0	0	0	14	88	32	25	0	0	0	0	0	0	0		Bacteria;Chloroflexi;Anaerolineae;Anaerolineales;Anaerolineaceae;Anaerolineaceae_uncultured;wastewater_metagenome
HWI-M02808_115_AHB9G_1_1101_9338_5262	287	256	0	0	0	0	0	0	0	0	0	0	0	0	5	0	0	0	2	0	1	0	1	0	0	0	0	0	0	0	0	0	0	1	0	0	0	9		Bacteria;Proteobacteria;Alphaproteobacteria;Rhizobiales;JG34-KF-361;JG34-KF-361_unclassified;JG34-KF-361_unclassified
HWI-M02808_115_AHB9G_1_1102_17709_12498	287	0	0	0	0	0	0	0	0	0	0	0	0	0	0	0	0	0	0	0	0	0	0	0	0	72	24	45	5	4	0	47	0	7	37	27	0	1		Bacteria;Proteobacteria;Gammaproteobacteria;Xanthomonadales;Xanthomonadales_Incertae_Sedis;Acidibacter;Acidibacter_unclassified
HWI-M02808_115_AHB9G_1_1101_15018_4844	287	176	0	0	0	0	0	0	0	0	0	34	0	0	47	0	0	0	0	0	0	0	30	0	0	0	0	0	0	0	0	0	0	0	0	0	0	0		Bacteria;Acidobacteria;Acidobacteria;Subgroup_6;Subgroup_6_unclassified;Subgroup_6_unclassified;Subgroup_6_unclassified
HWI-M02808_115_AHB9G_1_1102_15343_11804	287	0	0	117	0	0	0	0	0	0	0	160	0	0	0	0	0	0	0	0	0	0	0	0	0	0	0	0	0	1	0	0	0	0	0	0	0	0		Bacteria;Acidobacteria;Acidobacteria;Acidobacteriales;Acidobacteriaceae_(Subgroup_1);Granulicella;uncultured_bacterium
HWI-M02808_177_ANHM9_1_2105_21266_14739	287	0	0	287	0	0	0	0	0	0	0	0	0	0	0	0	0	0	0	0	0	0	0	0	0	0	0	0	0	0	0	0	0	0	0	0	0	0		Bacteria;Bacteroidetes;Sphingobacteriia;Sphingobacteriales;Sphingobacteriaceae;Mucilaginibacter;uncultured_Mucilaginibacter_sp.
HWI-M02808_115_AHB9G_1_1101_5612_15809	287	4	0	0	0	0	0	0	0	0	0	0	44	0	0	0	0	0	0	0	0	0	0	0	0	86	8	39	10	0	20	75	0	0	0	0	0	0		Bacteria;Proteobacteria;Alphaproteobacteria;Rhizobiales;A0839;A0839_unclassified;A0839_unclassified
HWI-M02808_115_AHB9G_1_1106_12766_26491	286	2	0	0	0	18	0	26	0	0	0	6	29	0	4	3	12	7	66	21	1	0	0	61	0	0	1	0	0	5	17	0	0	0	0	0	0	0		Bacteria;Planctomycetes;Phycisphaerae;WD2101_soil_group;uncultured_bacterium;uncultured_bacterium_unclassified;uncultured_bacterium_unclassified
HWI-M02808_115_AHB9G_1_1102_29185_13210	286	52	0	0	0	0	0	0	0	0	0	0	6	0	0	5	2	0	0	0	1	0	0	2	0	27	4	1	3	0	24	59	23	8	0	30	22	0		Bacteria;Proteobacteria;Alphaproteobacteria;Rhizobiales;Xanthobacteraceae;Variibacter;Variibacter_unclassified
HWI-M02808_115_AHB9G_1_1109_2748_16533	286	3	9	0	0	0	10	1	7	0	1	0	0	0	0	37	0	0	0	0	0	0	0	0	69	8	0	0	0	0	0	7	4	0	45	2	0	0		Bacteria;Actinobacteria;Thermoleophilia;Solirubrobacterales;YNPFFP1;uncultured_bacterium;uncultured_bacterium_unclassified
HWI-M02808_115_AHB9G_1_1103_5222_23702	285	0	0	0	0	0	0	124	0	5	0	0	0	0	0	0	30	10	59	0	0	0	0	28	0	10	1	0	6	1	0	0	0	0	0	0	0	0		Bacteria;Actinobacteria;Actinobacteria;Micromonosporales;Micromonosporaceae;Micromonosporaceae_unclassified;Micromonosporaceae_unclassified
HWI-M02808_115_AHB9G_1_1103_19948_20367	285	0	0	0	5	23	0	0	0	0	0	0	1	0	1	0	0	0	1	0	0	0	0	0	0	29	5	7	2	24	0	16	44	19	0	42	39	20		Bacteria;Acidobacteria;Acidobacteria;Subgroup_3;Unknown_Family;Bryobacter;uncultured_Acidobacteria_bacterium
HWI-M02808_115_AHB9G_1_1102_24265_15895	285	0	0	0	0	0	0	0	0	0	0	0	0	0	0	0	0	0	0	0	0	0	0	1	0	76	5	0	0	0	0	1	92	31	0	43	31	0		Bacteria;Proteobacteria;Gammaproteobacteria;Xanthomonadales;Xanthomonadales_Incertae_Sedis;Acidibacter;Acidibacter_unclassified
HWI-M02808_115_AHB9G_1_1101_8364_8235	284	0	0	0	0	0	0	0	0	0	0	0	0	0	0	0	0	0	0	0	0	0	0	0	0	194	8	0	0	0	0	42	0	9	0	0	0	31	Ground	Bacteria;Bacteroidetes;Sphingobacteriia;Sphingobacteriales;Chitinophagaceae;Chitinophagaceae_unclassified;Chitinophagaceae_unclassified
HWI-M02808_115_AHB9G_1_1101_6138_7950	284	0	0	0	25	8	0	4	0	0	0	2	0	0	11	0	80	13	9	0	4	68	11	18	3	0	0	0	0	0	0	0	4	0	0	0	0	0		Bacteria;Acidobacteria;Acidobacteria;Acidobacteriales;Acidobacteriaceae_(Subgroup_1);Edaphobacter;Edaphobacter_sp._IMSNU_JC2954
HWI-M02808_115_AHB9G_1_1102_19771_23380	284	25	0	0	0	17	0	15	0	0	1	21	19	5	3	17	16	9	26	6	0	20	0	26	1	0	1	6	7	12	0	0	2	0	0	0	0	0		Bacteria;Actinobacteria;Actinobacteria;Propionibacteriales;Nocardioidaceae;Marmoricola;uncultured_bacterium
HWI-M02808_115_AHB9G_1_2108_7037_25767	284	2	0	0	0	0	0	12	0	0	0	21	31	1	7	8	4	0	56	8	4	39	31	10	0	0	0	6	0	13	5	0	2	0	0	1	0	0		Bacteria;Chlorobi;Chlorobia;Chlorobiales;SJA-28;SJA-28_unclassified;SJA-28_unclassified
HWI-M02808_115_AHB9G_1_1105_12078_21943	283	29	2	11	39	23	10	12	0	2	0	17	29	2	0	18	0	0	8	0	0	0	0	22	0	7	0	5	0	2	21	5	0	0	2	3	0	0		Bacteria;Bacteroidetes;Sphingobacteriia;Sphingobacteriales;Sphingobacteriales_unclassified;Sphingobacteriales_unclassified;Sphingobacteriales_unclassified
HWI-M02808_115_AHB9G_1_1101_7159_7261	283	64	0	0	0	0	0	35	0	0	0	6	56	11	9	0	23	0	54	0	0	0	0	0	2	0	0	0	0	2	13	0	0	0	0	0	0	0		Bacteria;Actinobacteria;Actinobacteria;Kineosporiales;Kineosporiaceae;Kineosporiaceae_unclassified;Kineosporiaceae_unclassified
HWI-M02808_115_AHB9G_1_1104_24689_7916	283	9	0	0	5	32	145	0	0	0	0	28	2	25	0	0	0	0	0	1	0	0	0	0	15	0	0	0	0	0	8	0	0	0	0	0	0	0		Bacteria;Planctomycetes;Phycisphaerae;WD2101_soil_group;uncultured_bacterium;uncultured_bacterium_unclassified;uncultured_bacterium_unclassified
HWI-M02808_177_ANHM9_1_2104_19227_25547	283	0	1	53	16	5	9	8	9	7	6	9	8	0	4	32	0	1	4	3	0	0	0	30	1	5	0	2	18	16	18	0	0	0	3	0	0	0		Bacteria;Acidobacteria;Acidobacteria;Acidobacteriales;Acidobacteriaceae_(Subgroup_1);Acidobacteriaceae_(Subgroup_1)_unclassified;Acidobacteriaceae_(Subgroup_1)_unclassified
HWI-M02808_115_AHB9G_1_1102_10063_17190	283	0	0	0	0	0	0	0	0	0	0	0	0	0	0	0	0	0	0	0	159	124	0	0	0	0	0	0	0	0	0	0	0	0	0	0	0	0	CAAT_Inhibited	Bacteria;Proteobacteria;Alphaproteobacteria;Rhizobiales;Hyphomicrobiaceae;Devosia;Devosia_unclassified
HWI-M02808_115_AHB9G_1_1101_23472_11314	282	14	0	0	0	6	0	2	0	0	0	9	2	0	3	0	0	0	3	1	0	0	0	2	0	25	7	5	0	4	11	15	30	11	1	48	25	29		Bacteria;Actinobacteria;Thermoleophilia;Gaiellales;Gaiellales_unclassified;Gaiellales_unclassified;Gaiellales_unclassified
HWI-M02808_115_AHB9G_1_1101_25879_16852	282	3	61	0	0	1	0	17	49	0	58	0	0	0	0	8	0	0	0	0	0	0	0	0	0	0	0	0	0	0	0	4	0	0	16	0	0	0		Bacteria;WD272;uncultured_bacterium;uncultured_bacterium_unclassified;uncultured_bacterium_unclassified;uncultured_bacterium_unclassified;uncultured_bacterium_unclassified
HWI-M02808_115_AHB9G_1_1103_17138_11548	282	9	10	0	0	20	0	27	0	3	3	0	0	1	0	0	0	4	8	7	0	1	0	0	3	6	0	7	0	20	101	1	2	4	0	0	0	11		Bacteria;Proteobacteria;Deltaproteobacteria;Myxococcales;Polyangiaceae;Sorangium;Sorangium_unclassified
HWI-M02808_177_ANHM9_1_1102_26814_16670	282	0	3	12	0	0	22	0	39	131	0	0	0	0	0	2	0	0	2	0	0	0	0	0	0	15	0	0	0	0	0	1	3	0	18	0	0	0		Bacteria;Acidobacteria;Acidobacteria;Subgroup_3;Unknown_Family;Bryobacter;uncultured_Acidobacteria_bacterium
HWI-M02808_177_ANHM9_1_1107_26345_10813	282	0	0	0	0	0	0	0	0	0	0	0	0	0	0	0	0	0	0	0	0	0	0	0	0	16	0	67	4	26	1	8	41	38	0	40	11	27		Bacteria;Verrucomicrobia;Opitutae;Opitutae_vadinHA64;uncultured_bacterium;uncultured_bacterium_unclassified;uncultured_bacterium_unclassified
HWI-M02808_115_AHB9G_1_1102_20753_24601	281	27	1	11	10	23	20	26	0	0	3	5	3	0	0	0	0	1	0	0	0	0	0	0	0	17	0	0	0	0	19	0	0	0	47	0	5	60		Bacteria;Acidobacteria;Acidobacteria;Subgroup_3;Unknown_Family;Bryobacter;uncultured_Acidobacteria_bacterium
HWI-M02808_115_AHB9G_1_1109_21229_19470	281	0	0	0	0	0	0	0	0	0	0	0	0	0	3	0	7	0	9	0	7	1	13	0	0	0	19	66	35	12	10	0	20	0	0	0	54	2		Bacteria;Acidobacteria;Acidobacteria;Subgroup_6;Subgroup_6_unclassified;Subgroup_6_unclassified;Subgroup_6_unclassified
HWI-M02808_177_ANHM9_1_2107_11766_6987	280	0	3	23	0	0	0	0	0	0	9	0	9	26	6	0	38	0	25	14	1	14	8	48	0	3	2	4	10	0	6	0	0	0	4	3	0	1		Bacteria;Proteobacteria;Alphaproteobacteria;Rhodospirillales;Rhodospirillaceae;Inquilinus;uncultured_eubacterium_WD278
HWI-M02808_115_AHB9G_1_1107_15920_26195	280	0	0	0	7	0	0	19	0	0	0	11	37	3	0	16	0	5	9	8	0	0	0	19	7	2	2	35	42	9	6	5	1	0	2	1	8	0		Bacteria;Proteobacteria;Alphaproteobacteria;Rhizobiales;Hyphomicrobiaceae;Devosia;uncultured_alpha_proteobacterium
HWI-M02808_115_AHB9G_1_1114_11498_21716	280	0	0	0	0	6	0	15	0	0	0	7	0	1	0	1	16	0	0	2	0	0	0	17	7	6	4	1	0	11	5	1	67	20	1	35	40	9		Bacteria;Actinobacteria;Actinobacteria;Micromonosporales;Micromonosporaceae;Micromonosporaceae_unclassified;Micromonosporaceae_unclassified
HWI-M02808_115_AHB9G_1_1101_25307_9487	280	121	0	0	0	0	0	29	0	0	0	0	0	0	0	0	0	0	0	0	0	0	0	0	0	5	6	1	0	49	8	1	0	0	0	14	23	0		Bacteria;Acidobacteria;Acidobacteria;Subgroup_17;uncultured_Acidobacteriales_bacterium;uncultured_Acidobacteriales_bacterium_unclassified;uncultured_Acidobacteriales_bacterium_unclassified
HWI-M02808_177_ANHM9_1_1110_23658_14996	280	0	0	0	0	19	0	26	1	0	0	0	49	7	3	1	27	0	34	8	1	20	0	3	3	0	1	12	12	19	13	4	7	0	0	3	2	0		Bacteria;Bacteroidetes;Sphingobacteriia;Sphingobacteriales;Chitinophagaceae;Chitinophagaceae_uncultured;Chitinophagaceae_unclassified
HWI-M02808_177_ANHM9_1_1107_14487_19619	279	0	0	0	0	0	0	0	0	0	0	0	0	0	0	0	0	0	0	1	0	0	0	0	0	0	10	39	17	15	0	109	0	64	0	0	24	0		Bacteria;Bacteroidetes;Sphingobacteriia;Sphingobacteriales;Chitinophagaceae;Chitinophagaceae_unclassified;Chitinophagaceae_unclassified
HWI-M02808_177_ANHM9_1_1102_23120_9884	279	0	0	0	0	0	0	0	0	0	0	0	0	0	0	0	0	4	0	0	7	0	0	22	1	0	26	23	10	78	1	11	25	3	0	15	20	0		Bacteria;Chloroflexi;KD4-96;uncultured_bacterium;uncultured_bacterium_unclassified;uncultured_bacterium_unclassified;uncultured_bacterium_unclassified
HWI-M02808_115_AHB9G_1_2112_14891_16235	279	1	1	0	5	6	3	12	4	21	0	23	9	15	6	15	11	2	75	8	1	0	0	16	2	0	0	2	0	0	0	7	1	5	0	0	0	8		Bacteria;Proteobacteria;Alphaproteobacteria;Rhodospirillales;Rhodospirillales_Incertae_Sedis;Reyranella;uncultured_alpha_proteobacterium
HWI-M02808_115_AHB9G_1_2102_14596_27113	279	0	0	0	0	0	0	0	0	0	0	0	28	6	0	110	65	0	0	7	0	0	5	5	0	0	0	0	0	3	22	0	0	0	0	0	0	0		Bacteria;Acidobacteria;Acidobacteria;Subgroup_3;Unknown_Family;Bryobacter;uncultured_Acidobacteria_bacterium
HWI-M02808_115_AHB9G_1_2105_15620_25571	279	0	0	0	0	0	0	0	0	0	0	0	0	0	0	0	0	0	0	0	0	0	0	0	0	7	1	22	25	54	0	0	66	31	0	36	23	9		Bacteria;Proteobacteria;Gammaproteobacteria;Xanthomonadales;Xanthomonadales_uncultured;Xanthomonadales_unclassified;Xanthomonadales_unclassified
HWI-M02808_115_AHB9G_1_1105_6997_15240	278	0	0	9	0	25	30	3	0	4	0	86	2	12	0	43	0	0	0	0	0	0	0	7	20	1	3	1	8	0	6	1	0	0	9	0	0	0		Bacteria;Verrucomicrobia;OPB35_soil_group;OPB35_soil_group_unclassified;OPB35_soil_group_unclassified;OPB35_soil_group_unclassified;OPB35_soil_group_unclassified
HWI-M02808_115_AHB9G_1_1102_10166_5975	278	0	0	43	143	13	7	0	0	0	0	11	0	0	0	14	3	4	0	0	0	0	0	33	3	0	0	0	0	0	0	0	0	0	0	0	0	0		Bacteria;Acidobacteria;Acidobacteria;Acidobacteriales;Acidobacteriaceae_(Subgroup_1);Acidobacteriaceae_(Subgroup_1)_unclassified;Acidobacteriaceae_(Subgroup_1)_unclassified
HWI-M02808_115_AHB9G_1_1101_26879_13771	278	134	0	0	0	0	0	0	0	0	0	0	0	0	0	0	0	0	0	0	0	0	0	0	0	119	0	0	0	0	0	21	0	0	0	4	0	0		Bacteria;Proteobacteria;Deltaproteobacteria;Myxococcales;Haliangiaceae;Haliangium;Haliangium_unclassified
HWI-M02808_115_AHB9G_1_1103_21520_23317	277	2	7	0	9	31	3	13	1	0	5	3	1	3	0	15	0	2	14	12	0	0	1	14	9	22	0	11	9	6	20	0	2	0	9	7	6	2		Bacteria;Actinobacteria;Thermoleophilia;Gaiellales;Gaiellales_uncultured;Gaiellales_unclassified;Gaiellales_unclassified
HWI-M02808_115_AHB9G_1_1107_25201_5373	277	6	0	0	12	2	0	2	0	0	0	5	29	0	19	25	0	1	0	5	11	40	7	0	0	0	0	10	31	30	18	0	0	2	0	0	0	0		Bacteria;Acidobacteria;Acidobacteria;Subgroup_4;Subgroup_4_uncultured;Subgroup_4_unclassified;Subgroup_4_unclassified
HWI-M02808_115_AHB9G_1_1101_23330_4874	277	0	0	0	0	0	0	0	0	0	0	0	0	0	0	0	0	0	0	0	0	0	0	0	0	85	0	0	0	0	0	0	5	51	136	0	0	0	GRFL_Unique	Bacteria;Acidobacteria;Acidobacteria;Acidobacteriales;Acidobacteriaceae_(Subgroup_1);Acidobacteriaceae_(Subgroup_1)_uncultured;Acidobacteriaceae_(Subgroup_1)_unclassified
HWI-M02808_115_AHB9G_1_1113_16590_15548	276	4	0	0	21	0	0	6	0	0	0	146	0	0	0	0	0	0	0	4	0	0	0	0	0	33	6	3	2	10	8	15	4	0	0	3	0	5		Bacteria;Acidobacteria;Acidobacteria;Subgroup_4;11-24;Acidobacteria_bacterium_Ellin7246;Acidobacteria_bacterium_Ellin7246_unclassified
HWI-M02808_115_AHB9G_1_1101_15753_25004	276	22	0	0	19	58	0	15	0	1	0	35	16	0	0	1	0	0	47	5	0	0	0	31	0	8	0	0	5	0	10	0	0	1	0	0	0	0		Bacteria;Verrucomicrobia;OPB35_soil_group;OPB35_soil_group_unclassified;OPB35_soil_group_unclassified;OPB35_soil_group_unclassified;OPB35_soil_group_unclassified
HWI-M02808_115_AHB9G_1_1110_14845_13858	276	2	8	1	0	0	0	0	0	0	0	11	27	12	2	0	0	3	7	0	0	0	0	8	2	5	1	22	6	0	116	1	0	0	12	0	0	0	Ground	Bacteria;Proteobacteria;Gammaproteobacteria;Xanthomonadales;Xanthomonadaceae;Rhodanobacter;uncultured_Rhodanobacter_sp.
HWI-M02808_115_AHB9G_1_1102_16967_13531	276	0	0	0	14	23	2	9	0	0	1	19	13	3	2	0	80	6	24	0	0	0	0	12	5	4	0	0	0	0	19	0	0	0	2	4	0	0		Bacteria;Proteobacteria;Betaproteobacteria;Burkholderiales;Oxalobacteraceae;Oxalobacteraceae_unclassified;Oxalobacteraceae_unclassified
HWI-M02808_115_AHB9G_1_2102_13459_20229	276	1	1	0	0	0	0	1	0	7	0	0	0	0	0	0	0	0	0	0	0	0	0	0	0	40	4	27	10	16	1	8	23	15	0	44	37	27		Bacteria;Proteobacteria;Alphaproteobacteria;Rhizobiales;Rhizobiales_unclassified;Rhizobiales_unclassified;Rhizobiales_unclassified
HWI-M02808_115_AHB9G_1_1101_27010_11630	276	21	0	0	0	0	0	0	0	0	0	0	16	0	11	0	0	0	0	0	17	6	13	0	0	0	0	39	86	62	5	0	0	0	0	0	0	0		Bacteria;Bacteroidetes;Cytophagia;Cytophagales;Cytophagaceae;Chryseolinea;Chryseolinea_unclassified
HWI-M02808_115_AHB9G_1_1102_29133_14054	276	0	0	0	0	0	0	0	0	0	0	0	0	0	0	0	0	0	0	0	0	0	0	0	0	13	16	8	0	1	0	7	38	10	0	81	82	10		Bacteria;Proteobacteria;Alphaproteobacteria;Rhizobiales;Hyphomicrobiaceae;Pedomicrobium;Pedomicrobium_unclassified
HWI-M02808_115_AHB9G_1_1101_13039_6470	275	0	0	3	0	13	0	4	0	11	0	20	7	0	5	0	38	29	19	3	0	25	13	50	8	0	0	0	0	0	0	0	0	0	0	0	0	0		Bacteria;Proteobacteria;Alphaproteobacteria;Rhodospirillales;Acetobacteraceae;Acidiphilium;Acidiphilium_unclassified
HWI-M02808_177_ANHM9_1_1102_13205_13593	275	0	0	0	0	0	0	0	0	0	0	0	0	0	0	0	0	0	0	0	0	0	0	0	0	0	14	20	39	43	1	12	29	0	0	15	70	3	Ground	Bacteria;Acidobacteria;Acidobacteria;Subgroup_17;Subgroup_17_unclassified;Subgroup_17_unclassified;Subgroup_17_unclassified
HWI-M02808_115_AHB9G_1_1101_8772_20624	275	10	0	0	0	38	0	0	0	0	0	0	38	0	6	0	0	19	58	0	0	21	9	51	0	0	0	0	0	0	0	0	0	0	6	0	0	0		Bacteria;Actinobacteria;Actinobacteria;Frankiales;Frankiaceae;Jatrophihabitans;Jatrophihabitans_unclassified
HWI-M02808_115_AHB9G_1_1102_23462_26039	275	16	0	0	4	6	0	6	0	0	3	8	25	0	0	0	18	4	0	0	22	35	0	35	1	0	0	13	0	13	13	0	11	0	0	7	10	0		Bacteria;Actinobacteria;Actinobacteria;Propionibacteriales;Nocardioidaceae;Nocardioides;uncultured_organism
HWI-M02808_115_AHB9G_1_1101_15653_17142	275	0	0	0	0	0	0	0	0	0	0	0	0	0	0	0	0	0	0	0	0	0	0	0	0	16	6	23	0	1	0	48	32	17	0	110	18	0		Bacteria;Bacteroidetes;Sphingobacteriia;Sphingobacteriales;Chitinophagaceae;Terrimonas;Terrimonas_unclassified
HWI-M02808_115_AHB9G_1_2109_10493_7844	275	0	0	0	0	3	0	17	0	0	0	0	25	0	10	0	46	0	30	4	0	9	5	43	0	0	0	17	15	12	24	0	0	0	0	0	0	0		Bacteria;Bacteroidetes;Sphingobacteriia;Sphingobacteriales;Chitinophagaceae;Chitinophagaceae_unclassified;Chitinophagaceae_unclassified
HWI-M02808_115_AHB9G_1_1103_14898_9386	275	12	0	0	0	5	0	35	0	0	0	0	0	0	0	0	0	0	0	0	0	0	0	0	0	0	0	10	24	0	53	0	12	95	0	0	15	5		Bacteria;Bacteroidetes;Sphingobacteriia;Sphingobacteriales;Chitinophagaceae;Chitinophagaceae_uncultured;uncultured_Chitinophagaceae_bacterium
HWI-M02808_115_AHB9G_1_1101_22153_5084	274	19	8	0	0	0	0	12	0	0	0	0	0	0	0	10	0	0	0	0	0	0	0	0	0	31	0	42	48	0	8	34	0	5	6	0	0	30		Bacteria;Proteobacteria;Alphaproteobacteria;Rhizobiales;Rhizobiales_Incertae_Sedis;Rhizomicrobium;Rhizomicrobium_unclassified
HWI-M02808_115_AHB9G_1_2110_12409_15601	273	0	0	0	0	0	1	0	0	0	0	0	0	0	0	0	0	0	0	0	0	0	0	0	0	153	0	5	0	0	0	114	0	0	0	0	0	0	Ground	Bacteria;Nitrospirae;Nitrospira;Nitrospirales;Nitrospiraceae;Nitrospira;uncultured_Nitrospiraceae_bacterium
HWI-M02808_115_AHB9G_1_1101_13262_12408	273	0	0	0	0	0	0	0	0	0	0	0	0	0	0	0	0	0	0	0	0	0	0	0	0	45	8	61	0	0	0	93	13	0	0	17	21	0		Bacteria;Bacteroidetes;Sphingobacteriia;Sphingobacteriales;Chitinophagaceae;Terrimonas;Terrimonas_unclassified
HWI-M02808_115_AHB9G_1_1101_22484_21101	272	5	0	0	3	0	0	0	0	0	0	0	3	0	0	7	19	0	23	6	0	2	7	38	0	0	6	36	5	49	0	1	27	0	0	18	9	0		Bacteria;Acidobacteria;Acidobacteria;Subgroup_4;Subgroup_4_uncultured;Subgroup_4_unclassified;Subgroup_4_unclassified
HWI-M02808_115_AHB9G_1_1101_14958_22790	272	0	0	0	10	18	7	6	0	0	0	0	7	0	0	2	58	39	0	1	0	0	0	42	0	0	0	4	0	0	1	1	13	15	1	1	1	28		Bacteria;Proteobacteria;Alphaproteobacteria;Sphingomonadales;Sphingomonadaceae;Sphingomonas;Sphingomonas_faeni
HWI-M02808_115_AHB9G_1_1104_5089_15691	272	0	0	0	0	0	0	0	0	0	0	0	0	0	0	4	0	0	0	0	0	0	0	0	0	0	0	0	0	0	0	6	0	0	258	0	0	4	GRFL_Unique	Bacteria;Proteobacteria;Alphaproteobacteria;Rhizobiales;Xanthobacteraceae;Xanthobacteraceae_unclassified;Xanthobacteraceae_unclassified
HWI-M02808_115_AHB9G_1_2113_17339_7735	271	2	0	0	4	0	0	0	0	0	0	10	0	0	0	0	0	0	0	0	0	0	0	2	0	76	1	19	7	0	2	19	18	9	0	85	2	14		Bacteria;Bacteroidetes;Sphingobacteriia;Sphingobacteriales;Sphingobacteriaceae;Mucilaginibacter;uncultured_Mucilaginibacter_sp.
HWI-M02808_115_AHB9G_1_2106_13266_20681	271	3	1	7	4	27	3	17	0	16	0	20	11	0	0	2	0	6	15	1	0	0	0	0	1	5	6	23	44	7	34	0	0	0	0	6	0	1		Bacteria;Acidobacteria;Acidobacteria;Subgroup_3;Unknown_Family;Bryobacter;uncultured_Acidobacteria_bacterium
HWI-M02808_115_AHB9G_1_1106_9586_15961	271	0	0	0	0	0	0	0	0	0	0	0	0	0	0	0	0	0	0	0	0	0	0	0	0	1	4	36	6	22	0	101	0	0	13	50	0	17		Bacteria;Bacteroidetes;Sphingobacteriia;Sphingobacteriales;Sphingobacteriaceae;Mucilaginibacter;uncultured_Mucilaginibacter_sp.
HWI-M02808_115_AHB9G_1_1113_7089_21837	270	0	0	0	0	0	0	14	0	0	0	0	68	11	0	19	36	0	57	19	11	0	0	0	2	0	0	0	0	0	6	0	0	0	0	0	0	0		Bacteria;Proteobacteria;Alphaproteobacteria;Rhizobiales;Bradyrhizobiaceae;Bradyrhizobiaceae_unclassified;Bradyrhizobiaceae_unclassified
HWI-M02808_177_ANHM9_1_2103_19561_18535	270	0	0	0	0	6	0	5	0	0	0	11	19	7	2	6	30	2	69	10	0	10	4	43	0	0	0	20	2	3	4	0	0	0	0	0	0	0		Bacteria;Bacteria_unclassified;Bacteria_unclassified;Bacteria_unclassified;Bacteria_unclassified;Bacteria_unclassified;Bacteria_unclassified
HWI-M02808_115_AHB9G_1_1104_24886_10200	270	16	0	0	0	4	0	8	0	0	0	0	16	1	0	2	13	0	33	0	0	27	0	10	0	0	2	30	45	14	30	9	1	3	3	0	0	0		Bacteria;Verrucomicrobia;Opitutae;Opitutales;Opitutaceae;Opitutus;Opitutus_unclassified
HWI-M02808_115_AHB9G_1_1108_20222_3925	270	0	0	1	0	12	0	5	0	0	0	47	6	3	15	0	9	14	28	21	3	5	3	15	0	0	0	0	20	9	8	0	0	0	0	0	4	0		Bacteria;Acidobacteria;Acidobacteria;Subgroup_6;Subgroup_6_unclassified;Subgroup_6_unclassified;Subgroup_6_unclassified
HWI-M02808_177_ANHM9_1_1105_7547_8553	270	0	8	0	40	15	0	5	0	0	6	32	40	0	0	12	0	7	2	5	0	0	0	3	6	0	7	0	0	1	9	0	4	0	11	11	0	0		Bacteria;Proteobacteria;Deltaproteobacteria;Myxococcales;Amb-16S-1034;uncultured_Polyangiaceae_bacterium;uncultured_Polyangiaceae_bacterium_unclassified
HWI-M02808_115_AHB9G_1_2105_15380_7607	269	1	3	61	16	10	10	2	4	48	22	37	10	6	0	8	0	0	4	3	0	0	0	0	9	0	0	0	0	0	6	0	0	0	0	0	0	0		Bacteria;Proteobacteria;Gammaproteobacteria;Xanthomonadales;Xanthomonadales_Incertae_Sedis;Acidibacter;Acidibacter_unclassified
HWI-M02808_177_ANHM9_1_2108_18853_5929	269	0	0	0	41	51	94	0	0	0	0	79	0	0	0	0	0	0	0	0	0	0	0	0	0	0	0	0	0	0	0	0	0	0	0	0	0	0		Bacteria;Acidobacteria;Acidobacteria;Acidobacteriales;Acidobacteriaceae_(Subgroup_1);Granulicella;uncultured_Acidobacteria_bacterium
HWI-M02808_115_AHB9G_1_1102_18607_19131	269	0	0	6	82	16	0	21	0	7	0	17	13	0	0	1	19	3	13	0	0	0	0	18	1	0	0	4	0	40	0	0	0	0	0	0	0	0		Bacteria;Cyanobacteria;Cyanobacteria;SubsectionIV;FamilyI;Nostoc;Nostoc_unclassified
HWI-M02808_115_AHB9G_1_2102_22175_4289	269	3	8	21	8	11	13	8	8	23	22	6	8	5	0	32	3	0	0	0	0	3	0	0	13	0	0	0	0	0	1	1	0	0	7	0	0	0		Bacteria;Actinobacteria;Actinobacteria;Frankiales;Frankiales_unclassified;Frankiales_unclassified;Frankiales_unclassified
HWI-M02808_115_AHB9G_1_1103_20459_16686	269	42	1	0	2	0	0	14	0	0	8	0	18	6	0	0	1	5	3	0	2	0	3	0	0	26	0	2	0	11	45	0	10	0	2	0	17	8		Bacteria;Proteobacteria;Alphaproteobacteria;Rhizobiales;Rhizobiales_Incertae_Sedis;Bauldia;uncultured_bacterium
HWI-M02808_115_AHB9G_1_1101_7370_25202	268	22	0	0	0	16	0	0	0	0	2	0	6	0	12	0	17	0	7	0	0	7	8	1	0	0	0	0	20	22	58	15	0	1	0	0	0	0		Bacteria;Acidobacteria;Acidobacteria;Subgroup_6;Subgroup_6_unclassified;Subgroup_6_unclassified;Subgroup_6_unclassified
HWI-M02808_115_AHB9G_1_1104_22382_8537	268	9	0	0	0	0	0	0	0	0	0	0	0	0	0	0	12	0	0	1	1	0	0	0	0	14	0	0	22	6	21	1	0	0	166	8	0	1	Ground	Bacteria;Actinobacteria;Actinobacteria;Streptomycetales;Streptomycetaceae;Streptomyces;Streptomyces_unclassified
HWI-M02808_115_AHB9G_1_1106_23001_25226	268	6	3	0	3	2	4	14	0	1	0	0	0	0	0	28	1	0	15	1	0	0	1	0	1	22	9	4	63	0	18	20	3	0	22	4	0	11		Bacteria;Bacteroidetes;Sphingobacteriia;Sphingobacteriales;Sphingobacteriales_unclassified;Sphingobacteriales_unclassified;Sphingobacteriales_unclassified
HWI-M02808_177_ANHM9_1_2103_9384_17373	268	0	0	4	11	43	44	23	2	0	4	53	7	7	0	27	0	3	4	0	0	0	0	0	2	0	0	0	0	0	1	0	0	0	0	0	0	0		Bacteria;Planctomycetes;Phycisphaerae;WD2101_soil_group;WD2101_soil_group_unclassified;WD2101_soil_group_unclassified;WD2101_soil_group_unclassified
HWI-M02808_177_ANHM9_1_1103_19529_17449	268	0	12	16	42	41	68	10	0	0	0	27	2	0	0	11	0	0	12	0	0	0	0	2	1	0	0	0	1	0	0	0	0	0	0	0	0	0		Bacteria;Acidobacteria;Acidobacteria;Subgroup_3;Unknown_Family;Bryobacter;Bryobacter_unclassified
HWI-M02808_115_AHB9G_1_1101_20575_7697	267	0	0	0	0	0	0	0	0	0	0	0	0	0	0	0	0	0	0	0	0	0	0	0	0	240	0	0	0	0	9	0	0	0	0	0	0	0	Ground	Bacteria;Actinobacteria;Actinobacteria;Streptomycetales;Streptomycetaceae;Streptomycetaceae_unclassified;Streptomycetaceae_unclassified
HWI-M02808_177_ANHM9_1_1105_23023_8767	267	0	0	0	0	0	0	0	0	0	0	0	0	0	0	0	0	0	264	0	0	0	0	0	0	0	0	0	0	0	0	0	0	0	0	0	0	0	CAAT_Inhibited	Bacteria;Acidobacteria;Acidobacteria;Subgroup_3;Unknown_Family;Bryobacter;Bryobacter_unclassified
HWI-M02808_115_AHB9G_1_2112_9409_26253	267	0	0	0	70	2	2	10	0	0	0	9	15	1	0	3	17	0	38	7	0	1	0	43	0	5	0	6	0	11	0	0	0	0	22	0	0	0		Bacteria;Acidobacteria;Acidobacteria;Subgroup_3;Unknown_Family;Candidatus_Solibacter;Candidatus_Solibacter_unclassified
HWI-M02808_115_AHB9G_1_2101_9421_20078	267	5	6	2	18	24	17	0	0	0	4	9	21	14	4	19	1	6	2	0	1	4	4	10	9	0	2	6	7	9	9	1	0	0	11	0	0	0		Bacteria;Armatimonadetes;Chthonomonadetes;Chthonomonadales;Chthonomonadaceae;Chthonomonas;uncultured_bacterium
HWI-M02808_115_AHB9G_1_1101_27143_7525	267	0	0	0	2	0	0	0	0	0	0	0	0	0	5	0	25	0	31	17	0	20	6	130	0	0	0	0	0	0	0	0	0	0	0	1	0	0	CASE_Unique	Bacteria;Verrucomicrobia;Opitutae;Opitutales;Opitutaceae;Opitutus;Opitutus_unclassified
HWI-M02808_115_AHB9G_1_2108_28785_18716	267	0	6	25	9	7	29	12	7	32	18	0	6	0	0	26	5	0	3	4	0	0	0	5	8	14	1	2	0	6	4	6	0	0	6	0	4	2		Bacteria;Proteobacteria;Gammaproteobacteria;Xanthomonadales;Xanthomonadales_uncultured;uncultured_bacterium;uncultured_bacterium_unclassified
HWI-M02808_177_ANHM9_1_2111_12826_15716	267	0	0	0	0	0	116	0	6	66	48	0	0	0	0	0	0	0	0	0	0	0	0	0	0	0	0	0	0	0	0	0	0	0	0	0	0	0		Bacteria;Bacteroidetes;Sphingobacteriia;Sphingobacteriales;Chitinophagaceae;Chitinophagaceae_uncultured;Sphingobacteriaceae_bacterium_BR5-29
HWI-M02808_115_AHB9G_1_1104_16690_14129	267	1	0	16	0	0	32	7	9	58	6	2	0	5	0	22	5	0	0	0	0	0	0	0	0	14	1	0	0	0	0	1	0	0	10	0	0	0		Bacteria;Proteobacteria;Gammaproteobacteria;Xanthomonadales;Xanthomonadales_Incertae_Sedis;Acidibacter;Acidibacter_unclassified
HWI-M02808_177_ANHM9_1_1111_18779_13170	267	0	1	0	4	0	0	105	0	0	0	0	0	0	0	21	14	0	13	0	0	25	0	13	1	3	0	0	13	18	16	0	3	0	0	3	5	0		Bacteria;Planctomycetes;Planctomycetacia;Planctomycetales;Planctomycetaceae;Gemmata;Gemmata_unclassified
HWI-M02808_115_AHB9G_1_1101_10987_18752	266	0	0	14	42	7	13	6	0	5	4	6	20	7	1	5	15	8	5	7	0	0	1	51	9	0	0	2	0	0	7	0	7	13	0	0	0	0		Bacteria;Acidobacteria;Acidobacteria;Acidobacteriales;Acidobacteriaceae_(Subgroup_1);Acidobacteriaceae_(Subgroup_1)_unclassified;Acidobacteriaceae_(Subgroup_1)_unclassified
HWI-M02808_115_AHB9G_1_2108_17793_28019	266	0	0	0	0	4	0	11	0	0	0	9	0	2	5	0	12	4	18	0	0	4	0	19	7	17	9	4	25	30	18	28	4	0	0	0	0	6		Bacteria;Proteobacteria;Alphaproteobacteria;Caulobacterales;Caulobacteraceae;Phenylobacterium;uncultured_bacterium
HWI-M02808_115_AHB9G_1_1107_11091_10611	266	2	0	0	6	0	0	0	0	0	0	0	3	0	27	2	17	3	8	1	0	1	0	10	0	0	2	16	117	22	20	0	0	2	0	0	0	0		Bacteria;Proteobacteria;Deltaproteobacteria;Myxococcales;Phaselicystidaceae;Phaselicystis;Phaselicystis_unclassified
HWI-M02808_177_ANHM9_1_1109_26350_16795	266	0	4	26	23	34	4	12	0	0	3	16	3	2	0	12	11	4	3	2	0	0	0	9	0	5	0	0	1	12	5	2	0	0	0	0	0	0		Bacteria;Proteobacteria;Deltaproteobacteria;Myxococcales;Haliangiaceae;Haliangium;Haliangium_unclassified
HWI-M02808_115_AHB9G_1_1102_20039_18018	266	0	0	0	2	5	0	12	0	0	0	0	1	0	106	0	20	0	0	13	0	44	19	4	0	0	0	0	0	0	0	0	0	0	0	0	0	0	CASE_Unique	Bacteria;Proteobacteria;Alphaproteobacteria;Sphingomonadales;Sphingomonadales_unclassified;Sphingomonadales_unclassified;Sphingomonadales_unclassified
HWI-M02808_115_AHB9G_1_1101_16567_14122	265	49	0	0	0	0	0	0	0	0	0	40	24	0	0	0	3	0	0	0	0	0	5	0	0	0	0	38	54	26	0	0	17	0	0	0	0	1		Bacteria;Actinobacteria;Acidimicrobiia;Acidimicrobiales;Acidimicrobiales_uncultured;Acidimicrobiales_unclassified;Acidimicrobiales_unclassified
HWI-M02808_115_AHB9G_1_1102_9273_12147	265	120	0	0	0	0	0	1	0	0	0	0	0	0	0	0	0	0	0	1	0	0	0	0	0	0	5	0	0	11	44	0	27	0	56	0	0	0		Bacteria;Verrucomicrobia;OPB35_soil_group;bacterium_Ellin516;bacterium_Ellin516_unclassified;bacterium_Ellin516_unclassified;bacterium_Ellin516_unclassified
HWI-M02808_115_AHB9G_1_1110_22754_9560	265	0	2	0	2	6	43	13	0	0	0	0	5	0	0	0	0	0	13	7	0	0	3	25	7	0	3	47	5	42	7	0	0	0	0	8	0	10		Bacteria;Proteobacteria;Alphaproteobacteria;Caulobacterales;Caulobacteraceae;Phenylobacterium;Phenylobacterium_unclassified
HWI-M02808_115_AHB9G_1_1101_17982_14544	265	0	0	0	0	0	0	0	0	0	0	0	0	0	0	0	0	0	0	0	0	0	0	0	0	0	0	0	0	0	0	0	0	0	265	0	0	0	GRFL_Unique	Bacteria;Bacteroidetes;Sphingobacteriia;Sphingobacteriales;Sphingobacteriaceae;Mucilaginibacter;Mucilaginibacter_unclassified
HWI-M02808_177_ANHM9_1_2101_26184_10554	265	0	0	16	1	12	26	0	1	98	67	0	0	1	0	10	0	0	3	0	0	0	0	0	0	2	0	0	0	0	0	0	0	0	0	0	0	0		Bacteria;Actinobacteria;Actinobacteria;Pseudonocardiales;Pseudonocardiaceae;Pseudonocardiaceae_unclassified;Pseudonocardiaceae_unclassified
HWI-M02808_115_AHB9G_1_1102_18143_15577	265	17	0	0	0	9	0	14	0	2	0	9	10	1	3	3	9	0	21	2	3	5	2	25	0	8	0	18	8	10	18	14	10	8	1	17	10	6		Bacteria;Actinobacteria;Acidimicrobiia;Acidimicrobiales;Acidimicrobiales_uncultured;uncultured_Acidimicrobiales_bacterium;uncultured_Acidimicrobiales_bacterium_unclassified
HWI-M02808_115_AHB9G_1_1101_7860_10289	264	7	0	4	8	59	36	11	0	21	0	51	0	2	0	33	0	1	0	0	0	0	0	0	4	0	0	12	0	3	6	0	0	0	0	0	0	0		Bacteria;Verrucomicrobia;OPB35_soil_group;uncultured_bacterium;uncultured_bacterium_unclassified;uncultured_bacterium_unclassified;uncultured_bacterium_unclassified
HWI-M02808_177_ANHM9_1_2107_19730_23603	264	0	0	0	0	0	0	2	0	0	0	0	11	0	1	23	10	2	42	4	16	82	1	20	0	0	0	6	0	0	10	0	0	14	1	0	0	0		Bacteria;Cyanobacteria;Chloroplast;Chloroplast_unclassified;Chloroplast_unclassified;Chloroplast_unclassified;Chloroplast_unclassified
HWI-M02808_115_AHB9G_1_1103_17801_27180	264	1	0	5	11	0	3	12	0	0	13	9	12	10	0	29	23	17	23	2	3	0	3	18	4	0	1	3	1	0	4	0	5	0	0	0	0	4		Bacteria;Proteobacteria;Alphaproteobacteria;Rhizobiales;Xanthobacteraceae;Xanthobacteraceae_unclassified;Xanthobacteraceae_unclassified
HWI-M02808_115_AHB9G_1_1104_10870_6165	264	4	0	1	20	8	8	17	0	1	1	8	29	2	0	23	39	1	27	2	0	0	1	52	0	0	0	3	0	0	16	0	0	0	0	0	0	0		Bacteria;Actinobacteria;Actinobacteria;Pseudonocardiales;Pseudonocardiaceae;Actinomycetospora;uncultured_bacterium
HWI-M02808_115_AHB9G_1_1103_7984_10326	264	13	0	3	21	20	31	18	1	21	2	18	10	1	0	37	4	0	9	4	0	0	1	12	5	4	0	10	0	5	0	3	0	0	1	7	0	0		Bacteria;Acidobacteria;Acidobacteria;Subgroup_3;Unknown_Family;Bryobacter;uncultured_Acidobacteria_bacterium
HWI-M02808_115_AHB9G_1_2113_16865_9715	264	0	0	0	0	1	0	6	0	0	0	3	4	0	6	3	10	5	13	13	56	38	28	24	0	0	0	0	0	0	2	0	1	0	0	0	0	0	CASE_Unique	Bacteria;Actinobacteria;Thermoleophilia;Solirubrobacterales;0319-6M6;0319-6M6_unclassified;0319-6M6_unclassified
HWI-M02808_177_ANHM9_1_1103_9881_11203	263	0	9	201	0	0	0	0	19	25	0	0	0	0	0	0	0	0	0	0	0	0	0	0	0	0	0	0	0	0	0	0	0	0	0	0	0	0		Bacteria;Actinobacteria;Actinobacteria;Frankiales;Acidothermaceae;Acidothermus;uncultured_soil_bacterium
HWI-M02808_115_AHB9G_1_2105_21178_21393	263	2	0	0	0	16	0	0	0	0	0	8	3	0	0	0	0	11	5	0	0	0	0	1	4	30	4	0	4	0	0	10	0	0	152	0	0	0	Ground	Bacteria;Actinobacteria;Actinobacteria;Frankiales;Frankiaceae;Jatrophihabitans;Jatrophihabitans_unclassified
HWI-M02808_115_AHB9G_1_1114_13573_5207	263	0	0	0	0	0	0	0	0	0	0	0	0	0	11	0	0	0	0	0	12	42	0	0	0	0	14	14	0	0	0	48	0	39	0	0	54	0		Bacteria;Verrucomicrobia;Opitutae;Opitutales;Opitutaceae;Opitutus;uncultured_bacterium
HWI-M02808_115_AHB9G_1_1103_11716_18960	263	14	0	7	0	0	49	9	0	0	79	23	0	53	0	16	0	0	0	0	0	0	0	0	0	9	1	0	0	0	0	0	0	0	0	0	0	0		Bacteria;Acidobacteria;Acidobacteria;Acidobacteriales;Acidobacteriaceae_(Subgroup_1);Acidobacteriaceae_(Subgroup_1)_unclassified;Acidobacteriaceae_(Subgroup_1)_unclassified
HWI-M02808_115_AHB9G_1_1102_6892_21589	263	45	0	0	10	36	0	0	0	2	0	0	0	0	0	0	0	0	42	0	0	0	0	0	0	1	0	0	0	0	0	24	0	0	98	0	0	0		Bacteria;Acidobacteria;Acidobacteria;Acidobacteriales;Acidobacteriaceae_(Subgroup_1);Granulicella;Granulicella_unclassified
HWI-M02808_115_AHB9G_1_2104_22630_18417	263	0	0	0	0	0	0	0	0	0	0	0	0	0	0	0	0	0	0	0	0	0	0	0	0	52	0	12	0	0	0	47	29	54	0	43	15	10		Bacteria;Verrucomicrobia;Opitutae;Opitutales;Opitutaceae;Opitutus;uncultured_proteobacterium
HWI-M02808_115_AHB9G_1_1105_16035_12649	262	4	4	60	14	30	13	16	0	9	5	6	8	0	0	0	0	8	0	0	0	0	0	0	1	14	0	6	0	0	0	3	0	0	40	0	0	0		Bacteria;Bacteroidetes;Sphingobacteriia;Sphingobacteriales;Chitinophagaceae;Chitinophagaceae_unclassified;Chitinophagaceae_unclassified
HWI-M02808_115_AHB9G_1_2104_21717_18493	262	0	0	0	0	0	0	9	0	0	0	0	1	0	37	0	2	0	4	0	16	109	18	0	0	0	0	8	2	0	0	0	0	0	0	0	0	0	CAAT_Inhibited	Bacteria;Actinobacteria;Actinobacteria;Micromonosporales;Micromonosporaceae;Micromonosporaceae_unclassified;Micromonosporaceae_unclassified
HWI-M02808_115_AHB9G_1_1103_15194_6097	262	0	0	0	0	101	5	0	0	0	0	40	0	0	0	0	0	0	1	0	0	7	0	0	0	0	0	24	1	16	42	0	0	0	24	0	0	0		Bacteria;Bacteroidetes;Sphingobacteriia;Sphingobacteriales;Sphingobacteriaceae;Pedobacter;uncultured_Pedobacter_sp.
HWI-M02808_115_AHB9G_1_1102_13039_8697	262	9	5	7	15	26	4	7	0	1	0	0	15	3	3	49	18	3	8	2	0	3	0	4	6	9	0	3	7	0	12	0	0	0	13	0	0	0		Bacteria;Planctomycetes;Planctomycetacia;Planctomycetales;Planctomycetaceae;Planctomycetaceae_uncultured;uncultured_Zavarzinella_sp.
HWI-M02808_115_AHB9G_1_1110_27037_21779	262	0	0	0	2	0	0	0	0	0	0	0	24	0	0	0	0	0	0	7	0	0	0	0	0	6	0	39	0	9	7	45	8	16	0	69	16	12		Bacteria;Verrucomicrobia;Spartobacteria;Chthoniobacterales;DA101_soil_group;uncultured_Verrucomicrobia_bacterium;uncultured_Verrucomicrobia_bacterium_unclassified
HWI-M02808_115_AHB9G_1_1101_10403_2560	261	0	0	0	0	0	0	0	0	0	0	0	139	0	0	0	11	0	0	0	0	0	0	1	0	3	0	0	9	19	62	1	5	0	0	1	10	0		Bacteria;Bacteroidetes;Sphingobacteriia;Sphingobacteriales;PHOS-HE51;uncultured_bacterium;uncultured_bacterium_unclassified
HWI-M02808_115_AHB9G_1_1101_6931_16191	261	0	0	0	0	0	0	0	0	0	0	0	0	0	0	0	0	0	0	0	0	0	0	0	0	0	0	0	0	0	0	9	0	0	252	0	0	0	GRFL_Unique	Bacteria;Acidobacteria;Acidobacteria;Acidobacteriales;Acidobacteriaceae_(Subgroup_1);Acidobacteriaceae_(Subgroup_1)_uncultured;uncultured_Acidobacterium_sp.
HWI-M02808_115_AHB9G_1_1101_20379_7965	261	0	0	0	0	0	0	0	0	0	0	0	0	0	0	0	0	0	0	0	0	0	0	0	0	135	0	5	0	0	0	115	0	0	5	1	0	0		Bacteria;Proteobacteria;Alphaproteobacteria;Rhodospirillales;I-10;I-10_unclassified;I-10_unclassified
HWI-M02808_115_AHB9G_1_2107_18512_11462	261	1	0	0	0	0	0	0	0	0	0	0	0	0	0	0	0	0	0	0	0	0	0	0	0	38	0	0	0	0	0	12	20	23	110	13	8	36		Bacteria;Proteobacteria;Deltaproteobacteria;GR-WP33-30;GR-WP33-30_unclassified;GR-WP33-30_unclassified;GR-WP33-30_unclassified
HWI-M02808_177_ANHM9_1_2111_24880_6401	260	0	2	23	11	52	58	0	0	21	2	1	0	7	0	57	0	0	0	0	0	0	0	0	14	0	0	0	0	0	0	0	0	0	0	0	0	0		Bacteria;Planctomycetes;Phycisphaerae;WD2101_soil_group;uncultured_bacterium;uncultured_bacterium_unclassified;uncultured_bacterium_unclassified
HWI-M02808_177_ANHM9_1_1104_23161_18000	260	0	0	0	0	0	0	0	0	0	0	0	0	0	0	0	0	0	0	0	0	0	0	0	0	0	0	69	3	0	0	57	0	34	0	73	0	22		Bacteria;Bacteroidetes;Sphingobacteriia;Sphingobacteriales;Chitinophagaceae;Parafilimonas;Parafilimonas_unclassified
HWI-M02808_115_AHB9G_1_1103_4204_15291	260	0	0	0	0	0	0	0	0	0	0	0	0	0	0	0	0	0	0	0	0	0	0	0	0	23	3	3	0	0	0	0	86	56	0	5	84	0		Bacteria;Bacteroidetes;Sphingobacteriia;Sphingobacteriales;Chitinophagaceae;Niastella;Niastella_unclassified
HWI-M02808_115_AHB9G_1_1111_16440_7191	259	0	0	0	0	0	0	0	0	0	0	0	0	0	0	0	0	0	0	0	0	0	0	0	0	5	18	17	0	0	1	106	41	20	0	18	14	9		Bacteria;Gemmatimonadetes;Gemmatimonadetes;Gemmatimonadales;Gemmatimonadaceae;Gemmatimonadaceae_uncultured;Gemmatimonadaceae_unclassified
HWI-M02808_115_AHB9G_1_1105_18306_13308	259	7	55	0	0	0	84	0	0	67	12	0	0	0	0	4	0	0	0	0	0	0	0	0	0	0	0	2	0	0	0	0	0	0	4	0	0	0		Bacteria;Planctomycetes;BD7-11;uncultured_bacterium;uncultured_bacterium_unclassified;uncultured_bacterium_unclassified;uncultured_bacterium_unclassified
HWI-M02808_115_AHB9G_1_1102_29100_16662	259	0	0	0	0	0	0	0	0	0	0	0	0	0	0	0	0	0	0	0	0	0	0	0	0	74	11	1	0	0	0	67	22	30	0	17	19	18		Bacteria;Proteobacteria;Alphaproteobacteria;Rhodospirillales;JG37-AG-20;JG37-AG-20_unclassified;JG37-AG-20_unclassified
HWI-M02808_115_AHB9G_1_1106_3436_18384	259	9	12	27	23	20	0	0	4	43	0	9	0	5	0	22	0	5	0	0	0	0	0	0	9	0	0	0	0	0	0	0	0	0	7	0	0	0		Bacteria;Proteobacteria;Alphaproteobacteria;Caulobacterales;Caulobacteraceae;Caulobacteraceae_unclassified;Caulobacteraceae_unclassified
HWI-M02808_115_AHB9G_1_1103_14806_4374	259	9	35	3	5	0	10	0	23	22	10	9	0	0	0	5	0	3	0	5	0	0	0	0	5	6	0	2	0	10	33	2	2	0	5	0	0	0		Bacteria;Proteobacteria;Alphaproteobacteria;Rhizobiales;Rhizobiales_unclassified;Rhizobiales_unclassified;Rhizobiales_unclassified
HWI-M02808_115_AHB9G_1_1103_9769_25620	258	0	0	0	0	0	0	0	0	0	0	0	0	0	0	0	0	0	0	0	0	0	0	0	0	0	0	0	0	0	0	13	18	9	100	0	0	109	Ground	Bacteria;Proteobacteria;Alphaproteobacteria;Rhizobiales;Xanthobacteraceae;Xanthobacteraceae_unclassified;Xanthobacteraceae_unclassified
HWI-M02808_177_ANHM9_1_2110_15348_25373	258	0	4	17	17	14	18	9	5	33	8	7	2	4	0	22	6	2	8	2	0	0	0	37	13	0	0	5	0	0	5	0	0	0	1	0	0	0		Bacteria;Verrucomicrobia;Opitutae;Opitutales;Opitutaceae;Opitutus;Opitutus_unclassified
HWI-M02808_177_ANHM9_1_2101_11827_19429	258	0	0	0	13	10	0	8	0	0	0	19	0	0	0	1	0	0	21	7	0	0	0	19	0	2	3	9	9	27	76	0	0	3	5	1	0	0		Bacteria;Proteobacteria;Deltaproteobacteria;Myxococcales;Myxococcales_unclassified;Myxococcales_unclassified;Myxococcales_unclassified
HWI-M02808_115_AHB9G_1_1101_10468_18312	258	13	14	15	0	0	8	2	38	76	0	0	0	0	0	12	0	0	0	0	0	0	0	0	0	4	0	0	0	0	2	9	0	0	9	0	0	0		Bacteria;Acidobacteria;Acidobacteria;Subgroup_2;Subgroup_2_unclassified;Subgroup_2_unclassified;Subgroup_2_unclassified
HWI-M02808_115_AHB9G_1_1106_7544_17005	258	2	1	0	3	9	0	7	0	0	0	0	20	0	0	0	24	0	22	3	0	0	2	19	1	16	0	10	6	20	27	26	2	9	6	4	3	10		Bacteria;Acidobacteria;Acidobacteria;Subgroup_3;Subgroup_3_unclassified;Subgroup_3_unclassified;Subgroup_3_unclassified
HWI-M02808_115_AHB9G_1_1101_8499_5664	257	0	0	0	8	0	0	0	0	0	0	0	37	0	4	34	0	2	7	0	2	47	18	59	0	0	3	0	12	1	0	0	5	0	0	0	3	0		Bacteria;Proteobacteria;Deltaproteobacteria;Myxococcales;Haliangiaceae;Haliangium;uncultured_bacterium
HWI-M02808_177_ANHM9_1_1103_7709_8024	257	0	0	0	74	9	0	25	0	0	3	4	14	2	0	0	0	0	0	0	0	0	2	0	0	19	0	0	31	0	22	15	9	0	1	22	0	0		Bacteria;Bacteroidetes;Sphingobacteriia;Sphingobacteriales;Chitinophagaceae;Chitinophagaceae_uncultured;Chitinophagaceae_unclassified
HWI-M02808_115_AHB9G_1_1101_6069_11104	256	24	0	2	2	32	2	55	0	0	0	0	0	0	0	0	0	14	3	1	0	0	0	0	0	5	5	0	0	0	82	0	0	2	4	0	0	2		Bacteria;Proteobacteria;Deltaproteobacteria;Myxococcales;Haliangiaceae;Haliangium;Haliangium_unclassified
HWI-M02808_115_AHB9G_1_1101_9580_5071	256	0	0	0	0	0	0	0	0	0	0	0	0	0	0	0	0	0	0	0	0	0	0	0	0	108	11	0	12	3	0	79	17	0	0	0	0	26		Bacteria;Acidobacteria;Holophagae;Subgroup_10;ABS-19;ABS-19_unclassified;ABS-19_unclassified
HWI-M02808_115_AHB9G_1_1101_16531_8439	256	0	0	0	0	0	0	0	0	0	0	0	0	0	0	0	0	0	0	0	0	0	0	0	0	50	0	27	0	7	0	62	31	15	0	37	7	13		Bacteria;Proteobacteria;Gammaproteobacteria;Xanthomonadales;Xanthomonadales_Incertae_Sedis;Acidibacter;uncultured_proteobacterium
HWI-M02808_115_AHB9G_1_1103_8771_7465	256	0	0	0	0	0	0	0	0	0	0	0	0	0	0	0	0	0	0	0	0	0	0	0	0	21	4	2	0	0	0	17	18	86	0	2	0	102		Bacteria;Proteobacteria;Betaproteobacteria;Nitrosomonadales;Nitrosomonadaceae;Nitrosomonadaceae_uncultured;Nitrosomonadaceae_unclassified
HWI-M02808_115_AHB9G_1_1101_10322_24386	256	0	0	21	21	10	9	31	0	1	10	7	30	10	0	73	0	4	0	0	0	0	1	0	5	3	0	0	4	0	0	0	0	0	6	0	0	5		Bacteria;Acidobacteria;Acidobacteria;Acidobacteriales;Acidobacteriaceae_(Subgroup_1);Acidobacteriaceae_(Subgroup_1)_unclassified;Acidobacteriaceae_(Subgroup_1)_unclassified
HWI-M02808_115_AHB9G_1_1108_22460_14030	255	16	9	34	10	9	3	18	0	0	0	0	7	14	0	9	3	1	2	7	2	0	3	0	5	14	4	0	1	0	3	2	8	6	4	9	0	18		Bacteria;Proteobacteria;Alphaproteobacteria;Rhizobiales;alphaI_cluster;alphaI_cluster_unclassified;alphaI_cluster_unclassified
HWI-M02808_115_AHB9G_1_2109_27430_13691	255	0	0	0	0	19	0	30	0	24	0	29	16	0	0	0	18	0	12	0	0	6	2	33	2	0	0	0	0	0	10	0	0	0	43	0	0	0		Bacteria;Verrucomicrobia;Verrucomicrobia_Incertae_Sedis;Unknown_Order;Unknown_Family;Candidatus_Methylacidiphilum;uncultured_bacterium
HWI-M02808_115_AHB9G_1_1102_20741_16705	255	0	0	0	0	0	0	0	0	0	0	0	0	0	0	0	0	0	0	0	0	0	0	0	0	0	18	23	0	0	0	0	33	1	0	131	0	49		Bacteria;Bacteroidetes;Sphingobacteriia;Sphingobacteriales;Chitinophagaceae;Niastella;Niastella_unclassified
HWI-M02808_115_AHB9G_1_1101_3211_15488	254	0	0	0	0	0	0	0	0	0	0	0	0	0	0	0	0	0	0	0	0	0	0	0	0	21	9	0	0	0	0	30	32	83	22	14	13	23		Bacteria;Proteobacteria;Betaproteobacteria;Methylophilales;Methylophilaceae;Methylophilaceae_uncultured;Methylophilaceae_unclassified
HWI-M02808_115_AHB9G_1_1112_14801_23155	254	17	0	13	5	17	18	8	1	10	17	14	0	2	0	10	0	7	0	0	0	0	0	0	3	20	0	1	0	0	20	23	0	0	17	0	0	3		Bacteria;Acidobacteria;Acidobacteria;Subgroup_2;uncultured_forest_soil_bacterium;uncultured_forest_soil_bacterium_unclassified;uncultured_forest_soil_bacterium_unclassified
HWI-M02808_115_AHB9G_1_1102_2292_14511	253	36	21	3	0	0	1	19	12	0	0	0	0	0	0	0	0	0	0	0	0	0	0	0	0	28	1	0	0	10	0	6	1	0	4	6	1	7		Bacteria;Proteobacteria;Alphaproteobacteria;Rhizobiales;Rhizobiales_Incertae_Sedis;Bauldia;Bauldia_unclassified
HWI-M02808_115_AHB9G_1_1103_16807_22795	252	10	1	7	0	8	34	22	22	2	1	12	9	1	0	6	0	1	0	3	0	0	0	0	1	14	0	1	0	3	21	4	0	0	19	6	0	13		Bacteria;Proteobacteria;Gammaproteobacteria;Xanthomonadales;Xanthomonadales_unclassified;Xanthomonadales_unclassified;Xanthomonadales_unclassified
HWI-M02808_115_AHB9G_1_1106_13846_19656	252	2	2	0	0	0	0	0	0	0	0	0	0	1	0	0	0	0	0	0	0	0	0	0	0	0	18	0	0	0	0	10	25	80	0	71	0	43		Bacteria;Acidobacteria;Acidobacteria;Subgroup_2;uncultured_Acidobacteria_bacterium;uncultured_Acidobacteria_bacterium_unclassified;uncultured_Acidobacteria_bacterium_unclassified
HWI-M02808_115_AHB9G_1_2110_8182_25104	252	0	0	0	0	0	20	0	0	0	0	0	2	0	0	8	2	0	0	0	0	0	0	0	1	17	0	15	0	5	0	16	19	10	22	64	0	0		Bacteria;Proteobacteria;Alphaproteobacteria;Caulobacterales;Caulobacteraceae;Phenylobacterium;Phenylobacterium_unclassified
HWI-M02808_177_ANHM9_1_1108_16864_14198	252	0	1	0	0	10	0	7	0	0	0	0	29	5	0	3	15	5	53	31	0	2	0	20	0	0	4	0	0	12	39	3	0	0	0	0	0	0		Bacteria;Proteobacteria;Alphaproteobacteria;Caulobacterales;Caulobacteraceae;Caulobacteraceae_unclassified;Caulobacteraceae_unclassified
HWI-M02808_115_AHB9G_1_1103_13981_10284	251	0	0	0	5	13	0	0	0	0	0	20	4	0	0	4	1	0	16	0	0	0	0	0	0	0	4	9	3	0	26	51	9	11	0	38	29	0		Bacteria;Proteobacteria;Alphaproteobacteria;Rhizobiales;Rhizobiales_Incertae_Sedis;Rhizomicrobium;Rhizomicrobium_unclassified
HWI-M02808_177_ANHM9_1_1114_4427_11858	251	0	0	3	26	32	8	0	0	0	2	25	16	0	2	4	3	3	7	1	1	7	0	28	0	1	0	0	22	17	0	2	9	9	3	0	0	0		Bacteria;Cyanobacteria;Melainabacteria;Obscuribacterales;uncultured_bacterium;uncultured_bacterium_unclassified;uncultured_bacterium_unclassified
HWI-M02808_177_ANHM9_1_1102_11457_26217	250	0	0	0	0	15	12	0	0	8	2	13	26	8	0	10	6	0	0	0	0	0	6	14	4	11	10	10	4	5	0	12	10	0	7	7	19	8		Bacteria;Proteobacteria;Alphaproteobacteria;Sphingomonadales;Sphingomonadaceae;Sphingomonas;Sphingomonas_wittichii
HWI-M02808_177_ANHM9_1_2103_15404_25879	250	0	0	0	0	0	0	0	0	0	0	0	0	0	0	0	0	0	0	0	0	0	0	0	0	22	0	1	0	0	0	27	0	0	11	0	0	189	Ground	Bacteria;Acidobacteria;Acidobacteria;Acidobacteriales;Acidobacteriaceae_(Subgroup_1);Acidobacteriaceae_(Subgroup_1)_uncultured;uncultured_Acidobacteriaceae_bacterium
HWI-M02808_115_AHB9G_1_1104_17448_2227	250	31	0	1	14	17	8	18	0	0	0	10	9	1	7	7	5	0	32	0	0	1	0	32	0	8	0	12	0	0	19	1	0	0	0	0	0	0		Bacteria;Acidobacteria;Acidobacteria;Acidobacteriales;Acidobacteriaceae_(Subgroup_1);Candidatus_Koribacter;Candidatus_Koribacter_unclassified
HWI-M02808_177_ANHM9_1_2102_27126_15757	249	0	0	0	0	0	0	0	0	0	0	0	0	0	0	0	0	0	0	0	0	0	0	0	0	118	18	2	0	0	0	23	0	6	16	8	0	58		Bacteria;Proteobacteria;Gammaproteobacteria;Xanthomonadales;Xanthomonadales_uncultured;Xanthomonadales_unclassified;Xanthomonadales_unclassified
HWI-M02808_115_AHB9G_1_1101_20300_11534	249	0	0	0	0	0	0	0	0	0	0	0	0	0	0	0	0	0	0	0	0	0	0	0	0	0	0	7	0	0	0	79	0	40	0	56	0	61		Bacteria;Proteobacteria;Alphaproteobacteria;Rhizobiales;Xanthobacteraceae;Pseudolabrys;Pseudolabrys_unclassified
HWI-M02808_115_AHB9G_1_1113_16566_25865	249	2	0	0	0	0	0	0	0	0	0	0	0	0	0	6	0	0	0	0	0	0	0	0	0	105	0	10	0	0	3	19	18	0	0	51	7	28		Bacteria;Acidobacteria;Acidobacteria;Acidobacteriales;Acidobacteriaceae_(Subgroup_1);Acidobacteriaceae_(Subgroup_1)_uncultured;Acidobacteriaceae_(Subgroup_1)_unclassified
HWI-M02808_115_AHB9G_1_1101_6469_22199	248	0	0	0	0	25	8	0	13	0	26	9	21	6	6	14	0	0	0	0	0	3	0	5	0	0	2	0	0	0	0	14	0	7	10	0	20	10		Bacteria;Armatimonadetes;Chthonomonadetes;Chthonomonadales;Chthonomonadaceae;Chthonomonas;uncultured_bacterium
HWI-M02808_115_AHB9G_1_1102_20800_20129	248	7	0	0	0	0	0	2	0	0	0	1	19	1	1	0	50	0	8	4	4	1	3	4	0	0	3	6	78	14	8	0	14	6	0	2	3	0		Bacteria;Actinobacteria;Actinobacteria;Micromonosporales;Micromonosporaceae;Dactylosporangium;Dactylosporangium_unclassified
HWI-M02808_115_AHB9G_1_1101_11161_9669	248	18	20	140	0	0	0	0	18	5	0	1	1	1	0	13	0	0	0	0	0	0	0	0	0	1	0	0	0	0	0	1	0	0	14	0	0	0		Bacteria;Verrucomicrobia;Opitutae;Opitutales;Opitutaceae;Opitutus;Opitutus_unclassified
HWI-M02808_115_AHB9G_1_1102_28697_13596	248	0	0	0	0	0	0	0	0	0	0	0	0	0	0	0	0	0	0	0	0	0	0	0	0	0	7	0	0	0	0	42	17	37	0	125	0	20		Bacteria;Verrucomicrobia;Spartobacteria;Chthoniobacterales;DA101_soil_group;DA101_soil_group_unclassified;DA101_soil_group_unclassified
HWI-M02808_115_AHB9G_1_1101_7968_6928	248	143	0	0	0	0	0	0	0	0	0	0	26	0	46	0	0	0	0	0	20	0	0	6	0	0	0	0	1	0	0	0	0	0	0	0	0	0		Bacteria;Proteobacteria;Alphaproteobacteria;Sphingomonadales;WW2-159;uncultured_bacterium;uncultured_bacterium_unclassified
HWI-M02808_177_ANHM9_1_1104_19198_8763	248	0	1	0	0	0	0	0	0	2	0	0	0	10	0	24	0	0	0	0	0	0	0	0	0	0	0	1	0	0	3	0	0	0	3	0	0	189		Bacteria;Proteobacteria;Betaproteobacteria;Burkholderiales;Oxalobacteraceae;Collimonas;Collimonas_arenae
HWI-M02808_177_ANHM9_1_1111_6310_21560	248	0	8	102	0	0	0	0	0	72	0	0	0	0	0	23	0	0	0	0	0	0	0	0	0	0	0	0	0	0	0	0	0	0	23	0	0	0		Bacteria;Verrucomicrobia;OPB35_soil_group;OPB35_soil_group_unclassified;OPB35_soil_group_unclassified;OPB35_soil_group_unclassified;OPB35_soil_group_unclassified
HWI-M02808_115_AHB9G_1_1102_17180_20739	248	7	0	30	0	0	40	0	7	0	9	0	0	6	0	90	0	0	0	0	0	0	0	0	8	11	0	0	0	0	3	0	0	0	1	0	0	0		Bacteria;Verrucomicrobia;OPB35_soil_group;OPB35_soil_group_unclassified;OPB35_soil_group_unclassified;OPB35_soil_group_unclassified;OPB35_soil_group_unclassified
HWI-M02808_115_AHB9G_1_1101_8686_4612	248	0	0	0	0	0	0	0	0	0	0	0	0	0	0	0	0	0	0	0	0	0	0	0	0	66	8	0	0	0	0	21	35	67	0	4	10	37		Bacteria;Acidobacteria;Acidobacteria;Subgroup_3;Unknown_Family;Bryobacter;uncultured_Acidobacteria_bacterium
HWI-M02808_115_AHB9G_1_1102_9084_8284	247	0	0	0	0	0	0	0	0	0	0	0	0	0	0	0	0	0	0	0	0	0	0	0	0	14	14	29	9	14	0	8	36	23	0	36	49	13		Bacteria;Bacteria_unclassified;Bacteria_unclassified;Bacteria_unclassified;Bacteria_unclassified;Bacteria_unclassified;Bacteria_unclassified
HWI-M02808_115_AHB9G_1_1102_5779_15884	247	0	0	0	0	0	0	0	0	0	0	0	0	0	0	0	0	0	0	0	0	0	0	0	0	9	0	1	0	0	0	101	22	17	0	21	74	2		Bacteria;Proteobacteria;Alphaproteobacteria;Rhizobiales;Rhizobiales_Incertae_Sedis;Rhizomicrobium;Rhizomicrobium_unclassified
HWI-M02808_115_AHB9G_1_1101_2538_15072	246	61	14	0	0	3	0	18	0	0	0	0	6	1	0	1	0	0	0	0	0	0	0	0	10	22	4	0	2	1	0	0	18	0	5	11	24	11		Bacteria;Proteobacteria;Alphaproteobacteria;Rhizobiales;Hyphomicrobiaceae;Rhodoplanes;uncultured_alpha_proteobacterium
HWI-M02808_115_AHB9G_1_1107_4331_12650	246	0	0	0	0	5	0	6	0	0	0	3	1	0	0	0	11	7	13	0	0	0	0	8	0	8	1	49	20	28	13	21	0	7	0	18	23	0		Bacteria;Planctomycetes;Planctomycetacia;Planctomycetales;Planctomycetaceae;Planctomycetaceae_uncultured;uncultured_Zavarzinella_sp.
HWI-M02808_115_AHB9G_1_1106_15681_16356	246	0	0	0	21	34	0	12	0	0	1	2	37	5	0	6	5	4	19	0	0	0	1	33	1	0	0	6	7	4	0	5	6	13	5	3	1	0		Bacteria;Proteobacteria;Alphaproteobacteria;Rhizobiales;Bradyrhizobiaceae;Bradyrhizobium;Bradyrhizobium_unclassified
HWI-M02808_115_AHB9G_1_1101_23844_11083	246	0	0	29	8	0	1	3	0	0	0	5	3	0	0	4	24	6	43	0	1	5	0	38	4	0	1	13	1	6	44	0	2	0	2	2	0	0		Bacteria;Bacteroidetes;Sphingobacteriia;Sphingobacteriales;Sphingobacteriaceae;Mucilaginibacter;Mucilaginibacter_unclassified
HWI-M02808_115_AHB9G_1_1107_13177_12845	246	6	0	0	2	8	0	10	0	0	0	1	9	0	4	0	1	0	10	4	0	1	3	2	0	12	10	19	14	10	3	17	40	1	2	22	13	3		Bacteria;Proteobacteria;Deltaproteobacteria;GR-WP33-30;uncultured_Dongia_sp.;uncultured_Dongia_sp._unclassified;uncultured_Dongia_sp._unclassified
HWI-M02808_115_AHB9G_1_1109_17782_12790	246	2	4	17	0	0	42	11	4	39	14	0	0	1	0	39	3	5	9	0	0	0	0	10	13	0	0	0	0	0	0	0	0	0	1	0	0	0		Bacteria;Proteobacteria;Deltaproteobacteria;Myxococcales;Polyangiaceae;Sorangium;Sorangium_unclassified
HWI-M02808_115_AHB9G_1_1104_21200_6929	246	4	0	0	14	0	0	3	0	0	0	19	10	4	0	8	13	2	37	5	0	0	0	0	0	3	0	34	1	15	54	1	0	0	7	0	0	0		Bacteria;Bacteroidetes;Sphingobacteriia;Sphingobacteriales;Sphingobacteriaceae;Sphingobacteriaceae_unclassified;Sphingobacteriaceae_unclassified
HWI-M02808_115_AHB9G_1_1101_9372_7952	245	7	0	0	0	10	2	0	0	0	0	2	0	0	0	24	0	0	0	0	0	0	0	2	0	12	4	14	21	15	105	0	10	0	3	0	0	8		Bacteria;Verrucomicrobia;OPB35_soil_group;OPB35_soil_group_unclassified;OPB35_soil_group_unclassified;OPB35_soil_group_unclassified;OPB35_soil_group_unclassified
HWI-M02808_177_ANHM9_1_1103_19420_10770	245	0	0	0	0	0	0	0	0	0	0	0	0	0	0	0	0	0	0	0	0	0	0	0	0	0	4	4	0	0	0	15	85	11	0	51	67	3		Bacteria;Bacteroidetes;Sphingobacteriia;Sphingobacteriales;Chitinophagaceae;Chitinophagaceae_unclassified;Chitinophagaceae_unclassified
HWI-M02808_115_AHB9G_1_1104_19746_9565	245	6	10	30	0	0	11	0	43	92	0	0	0	0	0	33	0	0	0	0	0	0	0	0	0	0	0	0	0	0	0	0	0	0	9	0	0	0		Bacteria;Verrucomicrobia;OPB35_soil_group;OPB35_soil_group_unclassified;OPB35_soil_group_unclassified;OPB35_soil_group_unclassified;OPB35_soil_group_unclassified
HWI-M02808_115_AHB9G_1_1101_24445_9011	245	0	0	37	53	42	23	0	0	0	18	38	15	0	0	0	0	0	0	0	0	0	0	7	0	0	0	0	0	0	0	1	0	0	0	0	0	0		Bacteria;Bacteroidetes;Sphingobacteriia;Sphingobacteriales;Sphingobacteriaceae;Mucilaginibacter;Mucilaginibacter_unclassified
HWI-M02808_115_AHB9G_1_1101_12974_15243	245	17	0	0	0	0	0	0	0	0	0	0	5	0	0	0	0	0	9	1	4	0	0	0	0	38	21	5	0	0	1	13	18	16	0	23	12	57		Bacteria;Proteobacteria;Alphaproteobacteria;Rhizobiales;Hyphomicrobiaceae;Rhodoplanes;Rhodoplanes_unclassified
HWI-M02808_177_ANHM9_1_1102_12326_6751	245	0	22	3	0	0	5	0	7	117	13	0	0	0	0	0	0	0	0	0	0	0	0	0	0	0	0	0	0	0	0	0	0	0	3	0	0	0		Bacteria;Actinobacteria;Thermoleophilia;Solirubrobacterales;YNPFFP1;uncultured_bacterium;uncultured_bacterium_unclassified
HWI-M02808_115_AHB9G_1_1104_20948_4025	244	1	0	0	34	0	0	19	0	0	0	8	16	6	2	4	23	17	34	12	0	0	3	35	0	0	0	4	1	0	8	1	2	2	0	0	0	0		Bacteria;Actinobacteria;Actinobacteria;Micrococcales;Microbacteriaceae;Amnibacterium;uncultured_bacterium
HWI-M02808_115_AHB9G_1_1101_2028_13051	244	28	0	0	12	0	0	0	0	0	0	0	66	0	0	0	22	1	80	7	1	0	8	0	0	0	0	0	0	0	0	1	3	1	0	3	0	1		Bacteria;Verrucomicrobia;Opitutae;Opitutales;Opitutaceae;Opitutus;uncultured_bacterium
HWI-M02808_115_AHB9G_1_1101_12623_2208	244	167	0	0	0	72	0	0	0	0	2	0	0	0	0	0	0	0	0	0	0	0	0	0	0	0	0	0	0	1	0	0	0	0	0	0	0	0		Bacteria;Actinobacteria;Thermoleophilia;Solirubrobacterales;Solirubrobacterales_unclassified;Solirubrobacterales_unclassified;Solirubrobacterales_unclassified
HWI-M02808_115_AHB9G_1_1102_13044_11234	244	0	0	0	0	0	0	0	0	0	0	0	0	0	0	0	0	0	0	0	0	0	0	0	0	62	4	5	0	0	0	43	11	59	0	49	7	3		Bacteria;Proteobacteria;Betaproteobacteria;Nitrosomonadales;Nitrosomonadaceae;Nitrosomonadaceae_uncultured;uncultured_Rhodocyclaceae_bacterium
HWI-M02808_177_ANHM9_1_1103_24363_9990	244	0	0	14	0	24	37	12	0	9	0	32	20	6	1	16	0	6	18	0	0	18	0	22	0	0	0	0	0	0	3	0	0	0	0	0	0	0		Bacteria;Verrucomicrobia;Spartobacteria;Chthoniobacterales;Chthoniobacterales_unclassified;Chthoniobacterales_unclassified;Chthoniobacterales_unclassified
HWI-M02808_115_AHB9G_1_1102_27032_10696	244	47	1	4	0	0	7	0	3	0	0	0	0	0	0	0	0	0	1	0	0	0	0	0	2	28	8	7	11	0	0	18	0	17	60	0	6	8		Bacteria;Fibrobacteres;Fibrobacteria;Fibrobacterales;Fibrobacteraceae;Fibrobacteraceae_uncultured;bacterium_enrichment_culture_clone_auto5_4W
HWI-M02808_115_AHB9G_1_1102_13556_6850	243	0	0	0	0	0	0	0	0	0	0	0	0	0	0	0	0	0	0	0	0	0	0	0	0	104	17	0	0	0	0	0	54	0	6	0	62	0		Bacteria;Proteobacteria;Alphaproteobacteria;Rhizobiales;Xanthobacteraceae;Pseudolabrys;Pseudolabrys_unclassified
HWI-M02808_115_AHB9G_1_1113_19696_10337	243	0	1	0	10	0	0	0	0	0	0	18	0	0	0	3	39	0	0	26	0	0	0	94	0	0	0	26	0	0	0	0	0	0	0	0	0	0		Bacteria;Proteobacteria;Alphaproteobacteria;Rhizobiales;Rhizobiales_Incertae_Sedis;Rhizomicrobium;Rhizomicrobium_unclassified
HWI-M02808_115_AHB9G_1_2103_7720_16176	243	3	0	3	22	8	7	3	0	0	2	8	10	6	4	6	26	7	6	2	1	9	4	43	5	0	3	2	14	5	10	4	0	0	1	0	3	0		Bacteria;Armatimonadetes;Armatimonadia;Armatimonadales;Armatimonadales_unclassified;Armatimonadales_unclassified;Armatimonadales_unclassified
HWI-M02808_115_AHB9G_1_1110_24769_11316	241	0	0	0	7	0	0	0	0	0	0	0	38	5	0	0	12	1	36	10	2	80	13	24	1	0	0	0	0	0	0	0	0	0	0	0	0	0		Bacteria;Proteobacteria;Betaproteobacteria;SC-I-84;SC-I-84_unclassified;SC-I-84_unclassified;SC-I-84_unclassified
HWI-M02808_177_ANHM9_1_1113_20283_9284	241	0	0	63	0	0	0	44	0	78	0	0	0	4	0	0	0	0	0	0	0	0	0	0	0	2	0	0	0	0	14	0	0	0	0	0	0	0		Bacteria;Actinobacteria;Thermoleophilia;Solirubrobacterales;Solirubrobacterales_unclassified;Solirubrobacterales_unclassified;Solirubrobacterales_unclassified
HWI-M02808_115_AHB9G_1_1105_13703_23516	241	5	0	0	0	0	0	0	0	0	0	0	16	0	0	0	0	0	96	0	0	14	0	0	0	5	4	14	9	24	45	0	0	0	0	4	0	1		Bacteria;Proteobacteria;Alphaproteobacteria;Rhodospirillales;Acetobacteraceae;Acetobacteraceae_uncultured;Acetobacteraceae_unclassified
HWI-M02808_115_AHB9G_1_1104_12430_2101	241	5	0	0	0	3	0	13	0	0	0	12	41	11	12	1	25	1	10	34	2	0	0	22	6	1	0	15	0	0	13	0	0	0	0	0	0	0		Bacteria;Actinobacteria;Actinobacteria;Propionibacteriales;Nocardioidaceae;Nocardioidaceae_unclassified;Nocardioidaceae_unclassified
HWI-M02808_115_AHB9G_1_2111_21457_23726	241	4	0	0	0	0	0	0	0	0	0	0	31	1	0	4	5	7	26	6	71	67	0	0	0	0	0	0	0	0	0	0	0	0	0	0	0	0	CASE_Unique	Bacteria;Acidobacteria;Acidobacteria;Subgroup_4;Unknown_Family;Blastocatella;Blastocatella_unclassified
HWI-M02808_115_AHB9G_1_1104_12086_11763	241	18	0	0	0	45	0	0	0	3	0	0	18	16	10	0	0	0	0	6	0	0	0	0	27	0	0	0	0	0	0	0	0	23	32	12	0	19		Bacteria;Proteobacteria;Alphaproteobacteria;Rhodospirillales;Rhodospirillales_Incertae_Sedis;Reyranella;Reyranella_unclassified
HWI-M02808_115_AHB9G_1_1109_10658_12702	241	13	0	0	0	0	0	0	0	0	0	0	0	0	0	0	0	0	14	178	0	25	0	0	0	0	0	0	0	0	0	0	0	0	0	0	0	0	CAAT_Inhibited	Bacteria;Acidobacteria;Acidobacteria;Subgroup_4;RB41;uncultured_bacterium;uncultured_bacterium_unclassified
HWI-M02808_177_ANHM9_1_1106_13456_20218	241	0	1	16	23	23	18	18	0	13	0	62	32	0	0	0	0	1	0	0	0	0	0	0	0	0	0	0	0	1	9	0	0	0	0	0	0	1		Bacteria;Proteobacteria;Deltaproteobacteria;Myxococcales;Polyangiaceae;Byssovorax;uncultured_bacterium
HWI-M02808_115_AHB9G_1_1113_17650_10156	241	7	1	0	0	0	0	10	0	0	0	5	11	0	0	2	1	0	29	0	0	0	1	14	0	35	2	13	7	3	18	23	6	8	4	20	0	19		Bacteria;Acidobacteria;Acidobacteria;Subgroup_3;Unknown_Family;Candidatus_Solibacter;uncultured_soil_bacterium
HWI-M02808_115_AHB9G_1_1101_19423_10476	241	0	0	0	0	0	0	0	0	0	0	0	0	0	0	0	0	0	0	0	0	0	0	0	0	9	12	30	25	33	0	35	24	14	0	18	40	0		Bacteria;Verrucomicrobia;OPB35_soil_group;uncultured_verrucomicrobium_DEV020;uncultured_verrucomicrobium_DEV020_unclassified;uncultured_verrucomicrobium_DEV020_unclassified;uncultured_verrucomicrobium_DEV020_unclassified
HWI-M02808_115_AHB9G_1_1104_10807_3965	240	0	0	10	0	0	0	0	0	0	0	2	0	0	0	0	0	0	0	0	0	0	0	0	0	4	0	0	0	0	0	0	0	0	169	0	0	0	GRFL_Unique	Bacteria;Bacteroidetes;Sphingobacteriia;Sphingobacteriales;Chitinophagaceae;Chitinophagaceae_unclassified;Chitinophagaceae_unclassified
HWI-M02808_115_AHB9G_1_1104_2336_17183	240	0	0	0	2	0	67	0	0	46	2	29	0	0	0	0	0	1	0	0	0	0	0	0	80	0	0	0	0	0	0	0	2	0	0	7	0	3		Bacteria;Chloroflexi;Ktedonobacteria;Ktedonobacterales;Ktedonobacteraceae;Ktedonobacter;uncultured_bacterium
HWI-M02808_115_AHB9G_1_1104_23000_4334	240	19	0	0	2	46	13	7	0	0	0	12	3	4	6	12	1	26	31	4	0	0	0	4	11	0	0	0	0	1	0	0	0	0	0	0	1	1		Bacteria;Planctomycetes;Phycisphaerae;WD2101_soil_group;WD2101_soil_group_unclassified;WD2101_soil_group_unclassified;WD2101_soil_group_unclassified
HWI-M02808_115_AHB9G_1_1101_11799_22342	240	24	0	0	0	3	0	1	0	0	0	9	0	0	5	0	0	0	0	0	3	2	3	1	0	0	4	15	23	17	0	11	19	20	0	58	4	1		Bacteria;Chloroflexi;KD4-96;uncultured_Chloroflexi_bacterium;uncultured_Chloroflexi_bacterium_unclassified;uncultured_Chloroflexi_bacterium_unclassified;uncultured_Chloroflexi_bacterium_unclassified
HWI-M02808_115_AHB9G_1_1105_17375_21891	240	0	0	0	0	0	0	0	0	0	0	0	0	0	0	0	0	0	0	0	0	0	0	0	0	0	0	0	0	0	0	168	71	0	0	0	0	0	Ground	Bacteria;Proteobacteria;Betaproteobacteria;Nitrosomonadales;Nitrosomonadaceae;Nitrosomonadaceae_uncultured;uncultured_delta_proteobacterium
HWI-M02808_115_AHB9G_1_1104_7143_18233	240	8	10	6	6	21	17	22	0	0	0	17	11	2	0	5	0	0	0	1	0	0	0	0	0	0	0	2	6	0	2	17	0	15	14	4	4	39		Bacteria;Verrucomicrobia;Spartobacteria;Chthoniobacterales;Xiphinematobacteraceae;Candidatus_Xiphinematobacter;Candidatus_Xiphinematobacter_unclassified
HWI-M02808_115_AHB9G_1_1102_25087_7246	240	0	0	35	0	0	0	0	0	0	0	0	0	0	0	0	0	0	0	0	0	0	0	0	0	2	6	0	0	0	0	0	0	0	100	0	0	6	Ground	Bacteria;Planctomycetes;Phycisphaerae;WD2101_soil_group;uncultured_bacterium;uncultured_bacterium_unclassified;uncultured_bacterium_unclassified
HWI-M02808_115_AHB9G_1_1102_9360_19236	240	0	0	3	37	26	17	3	1	3	4	6	23	0	0	14	10	0	4	1	0	0	0	8	5	3	1	11	1	11	7	0	0	2	33	0	3	1		Bacteria;Verrucomicrobia;OPB35_soil_group;OPB35_soil_group_unclassified;OPB35_soil_group_unclassified;OPB35_soil_group_unclassified;OPB35_soil_group_unclassified
HWI-M02808_115_AHB9G_1_1102_24845_22756	240	0	37	0	0	0	0	0	32	26	0	0	0	0	0	0	0	0	0	0	0	0	0	0	0	0	0	0	0	0	0	0	16	0	79	0	0	0		Bacteria;Proteobacteria;Alphaproteobacteria;Rhizobiales;Bradyrhizobiaceae;Bradyrhizobiaceae_unclassified;Bradyrhizobiaceae_unclassified
HWI-M02808_115_AHB9G_1_1103_20351_3785	240	6	0	0	6	4	0	4	0	0	0	14	15	0	7	8	4	0	34	5	0	0	0	9	0	1	2	51	5	7	7	18	5	4	0	16	4	2		Bacteria;Bacteroidetes;Sphingobacteriia;Sphingobacteriales;Chitinophagaceae;Ferruginibacter;uncultured_Bacteroidetes_bacterium
HWI-M02808_115_AHB9G_1_1101_15083_22779	240	9	1	0	0	3	0	0	0	0	0	3	12	6	0	7	5	0	32	6	9	29	7	9	0	4	1	15	0	11	14	3	10	2	0	2	18	0		Bacteria;Proteobacteria;Deltaproteobacteria;Myxococcales;Polyangiaceae;Sorangium;uncultured_bacterium
HWI-M02808_115_AHB9G_1_1102_18505_28634	240	4	9	8	2	0	0	21	1	29	0	10	8	15	0	13	4	4	0	10	0	0	0	0	12	0	2	6	0	0	38	10	0	0	0	0	8	0		Bacteria;Proteobacteria;Alphaproteobacteria;Rhodospirillales;DA111;DA111_unclassified;DA111_unclassified
HWI-M02808_115_AHB9G_1_1107_27974_12966	239	20	1	0	17	22	0	13	0	0	0	6	13	0	0	20	10	0	5	0	0	0	1	9	5	2	2	1	34	3	9	10	0	0	0	7	4	0		Bacteria;Proteobacteria;Deltaproteobacteria;Myxococcales;Polyangiaceae;Sorangium;Sorangium_unclassified
HWI-M02808_115_AHB9G_1_1104_26116_20033	239	0	0	0	2	0	0	0	0	0	0	12	28	0	3	0	3	6	57	8	0	3	9	0	0	0	0	33	0	16	18	0	21	9	0	0	0	0		Bacteria;Bacteroidetes;Sphingobacteriia;Sphingobacteriales;Chitinophagaceae;Ferruginibacter;uncultured_Bacteroidetes_bacterium
HWI-M02808_115_AHB9G_1_1101_23671_8387	239	0	0	0	0	0	0	0	0	0	0	0	0	0	0	0	0	0	0	0	0	0	0	0	0	224	0	0	0	0	0	0	0	0	11	0	0	4	Ground	Bacteria;Proteobacteria;Gammaproteobacteria;Xanthomonadales;Xanthomonadales_unclassified;Xanthomonadales_unclassified;Xanthomonadales_unclassified
HWI-M02808_115_AHB9G_1_1105_18580_10022	239	54	0	2	0	0	1	0	0	0	0	0	0	0	0	0	0	0	0	0	0	0	1	0	0	43	0	0	25	52	7	0	14	0	0	0	0	34		Bacteria;Verrucomicrobia;Opitutae;Opitutales;Opitutaceae;Opitutus;Opitutus_unclassified
HWI-M02808_115_AHB9G_1_1101_16298_7430	239	226	0	0	0	0	0	0	0	0	0	0	0	0	0	0	0	0	6	0	0	0	0	0	0	0	0	4	0	0	0	0	3	0	0	0	0	0		Bacteria;Gemmatimonadetes;Gemmatimonadetes;Gemmatimonadales;Gemmatimonadaceae;Gemmatimonadaceae_unclassified;Gemmatimonadaceae_unclassified
HWI-M02808_177_ANHM9_1_1103_16664_14240	239	0	0	0	0	0	0	0	0	0	0	0	0	0	5	0	0	0	0	0	0	0	0	44	0	0	7	18	114	11	8	0	2	29	0	1	0	0		Bacteria;Acidobacteria;Acidobacteria;Subgroup_4;Subgroup_4_uncultured;uncultured_Acidobacteria_bacterium;uncultured_Acidobacteria_bacterium_unclassified
HWI-M02808_115_AHB9G_1_2101_18275_18488	238	0	0	0	4	3	0	0	0	0	0	0	17	0	0	14	35	1	70	3	0	13	3	19	0	0	0	0	26	0	22	1	0	0	0	2	0	1		Bacteria;Actinobacteria;Actinobacteria;Pseudonocardiales;Pseudonocardiaceae;Pseudonocardia;Pseudonocardia_unclassified
HWI-M02808_115_AHB9G_1_1102_18183_7231	237	0	0	0	39	0	1	1	0	0	0	8	16	5	3	3	18	5	51	0	5	52	6	17	0	0	0	2	0	0	0	0	0	0	0	0	0	0		Bacteria;Acidobacteria;Acidobacteria;Subgroup_3;Unknown_Family;Candidatus_Solibacter;Candidatus_Solibacter_unclassified
HWI-M02808_115_AHB9G_1_1102_14193_10870	237	0	0	0	0	0	0	0	0	212	0	0	0	0	0	0	0	0	0	0	0	0	0	21	0	0	0	0	0	0	0	0	0	2	0	0	0	0		Bacteria;Bacteroidetes;Sphingobacteriia;Sphingobacteriales;Sphingobacteriaceae;Mucilaginibacter;Mucilaginibacter_unclassified
HWI-M02808_177_ANHM9_1_2107_18570_24550	237	0	2	0	0	0	0	0	4	5	0	0	0	0	0	217	0	0	0	0	0	0	0	0	0	0	0	0	0	0	0	0	0	0	2	0	0	0	CAAT_Inhibited	Bacteria;Planctomycetes;Phycisphaerae;WD2101_soil_group;WD2101_soil_group_unclassified;WD2101_soil_group_unclassified;WD2101_soil_group_unclassified
HWI-M02808_177_ANHM9_1_1107_11935_16733	237	0	6	0	41	0	0	94	0	15	0	81	0	0	0	0	0	0	0	0	0	0	0	0	0	0	0	0	0	0	0	0	0	0	0	0	0	0		Bacteria;Proteobacteria;Gammaproteobacteria;Xanthomonadales;Xanthomonadaceae;Xanthomonadaceae_unclassified;Xanthomonadaceae_unclassified
HWI-M02808_115_AHB9G_1_1108_15353_17747	237	0	0	0	0	0	13	0	0	0	0	33	0	3	0	0	0	0	0	0	0	0	0	7	0	16	0	0	0	66	0	0	21	0	15	17	22	15		Bacteria;Verrucomicrobia;Spartobacteria;Chthoniobacterales;Chthoniobacteraceae;Chthoniobacter;Chthoniobacter_unclassified
HWI-M02808_115_AHB9G_1_1101_9179_10764	237	0	0	0	33	6	0	3	0	0	3	22	0	7	4	8	31	27	5	0	4	12	4	18	10	0	0	7	0	7	3	0	0	0	0	0	0	0		Bacteria;Proteobacteria;Alphaproteobacteria;Rhizobiales;1174-901-12;1174-901-12_unclassified;1174-901-12_unclassified
HWI-M02808_177_ANHM9_1_2103_25845_16965	237	0	0	0	0	0	0	0	0	0	0	0	17	0	19	0	46	8	14	0	2	9	0	51	0	4	0	50	1	14	0	0	0	0	0	0	0	0		Bacteria;Cyanobacteria;Cyanobacteria;Cyanobacteria_uncultured;Cyanobacteria_unclassified;Cyanobacteria_unclassified;Cyanobacteria_unclassified
HWI-M02808_177_ANHM9_1_1112_20130_4264	236	0	7	0	0	0	0	206	0	0	0	0	0	0	0	0	0	0	0	0	0	0	0	0	0	0	0	3	1	0	0	12	0	0	0	0	0	3		Bacteria;Proteobacteria;Deltaproteobacteria;Myxococcales;Phaselicystidaceae;Phaselicystis;Phaselicystis_unclassified
HWI-M02808_177_ANHM9_1_1108_12063_24028	236	0	0	0	19	62	0	5	0	0	0	5	7	1	0	0	3	3	6	0	0	1	0	0	0	0	0	9	0	3	55	0	0	0	0	0	0	0		Bacteria;Chloroflexi;Chloroflexi_uncultured;Chloroflexi_unclassified;Chloroflexi_unclassified;Chloroflexi_unclassified;Chloroflexi_unclassified
HWI-M02808_177_ANHM9_1_1108_9737_20629	236	0	0	0	14	20	19	15	5	0	13	16	0	9	0	26	2	1	6	1	0	0	0	8	15	0	0	1	0	0	6	0	0	0	15	0	0	0		Bacteria;Proteobacteria;Alphaproteobacteria;Rhodospirillales;Acetobacteraceae;Acidisoma;uncultured_bacterium
HWI-M02808_177_ANHM9_1_1113_7468_5440	236	0	0	125	0	0	0	0	44	2	0	0	0	0	0	0	0	0	0	0	0	0	0	0	0	0	0	0	0	0	0	0	0	0	51	5	0	8		Bacteria;Actinobacteria;Actinobacteria;Catenulisporales;Actinospicaceae;Actinospica;Persicaria_minor
HWI-M02808_177_ANHM9_1_2108_13877_12268	235	0	0	0	6	0	0	32	0	0	0	0	10	0	0	1	0	0	4	0	0	0	0	0	0	0	0	0	118	20	21	0	0	0	6	0	0	0		Bacteria;Proteobacteria;Alphaproteobacteria;Rhizobiales;Rhizobiales_Incertae_Sedis;Rhizomicrobium;uncultured_alpha_proteobacterium
HWI-M02808_115_AHB9G_1_1101_8920_7234	235	0	0	0	0	0	0	0	0	0	0	0	0	0	0	0	0	0	0	0	0	0	0	0	0	69	0	0	0	0	0	11	1	10	138	0	0	6		Bacteria;Acidobacteria;Acidobacteria;Subgroup_2;uncultured_Acidobacteria_bacterium;uncultured_Acidobacteria_bacterium_unclassified;uncultured_Acidobacteria_bacterium_unclassified
HWI-M02808_177_ANHM9_1_2102_11334_23842	235	0	3	22	38	7	25	9	2	5	3	1	11	6	0	10	0	16	6	4	0	0	2	1	11	0	0	0	0	0	4	0	0	0	8	0	0	2		Bacteria;Planctomycetes;Phycisphaerae;WD2101_soil_group;uncultured_bacterium;uncultured_bacterium_unclassified;uncultured_bacterium_unclassified
HWI-M02808_115_AHB9G_1_1102_25304_5417	235	27	0	0	0	0	0	0	0	1	0	0	20	0	0	0	0	1	0	0	0	0	0	1	0	11	0	10	1	5	3	65	14	51	0	24	0	1		Bacteria;Bacteroidetes;Sphingobacteriia;Sphingobacteriales;AKYH767;uncultured_bacterium;uncultured_bacterium_unclassified
HWI-M02808_115_AHB9G_1_1103_18061_2912	235	0	0	0	0	0	0	0	0	0	0	0	0	0	0	0	0	0	0	0	0	0	0	0	0	72	12	0	0	0	0	74	15	16	0	33	9	3		Bacteria;Proteobacteria;Betaproteobacteria;Nitrosomonadales;Nitrosomonadaceae;Nitrosomonadaceae_uncultured;Nitrosomonadaceae_unclassified
HWI-M02808_115_AHB9G_1_1102_15776_16393	234	18	0	0	0	0	0	13	0	2	0	0	0	0	8	0	15	0	25	0	0	16	5	44	0	6	0	0	20	2	0	0	1	7	14	0	0	4		Bacteria;Bacteria_unclassified;Bacteria_unclassified;Bacteria_unclassified;Bacteria_unclassified;Bacteria_unclassified;Bacteria_unclassified
HWI-M02808_115_AHB9G_1_1107_9733_10149	234	17	0	0	1	0	0	0	0	0	0	1	4	0	13	0	7	0	0	0	0	0	1	11	0	3	0	29	50	20	18	11	4	0	0	23	13	7		Bacteria;Acidobacteria;Acidobacteria;Subgroup_3;Unknown_Family;Bryobacter;Bryobacter_unclassified
HWI-M02808_115_AHB9G_1_2111_7255_24995	234	0	1	0	0	8	0	0	0	0	0	0	8	0	4	6	19	7	21	5	5	2	3	19	5	8	0	3	13	34	19	0	0	0	0	0	2	0		Bacteria;Proteobacteria;Alphaproteobacteria;Rhizobiales;Xanthobacteraceae;Xanthobacteraceae_unclassified;Xanthobacteraceae_unclassified
HWI-M02808_177_ANHM9_1_1110_15160_28450	234	0	0	0	4	0	0	2	0	0	0	1	9	0	0	27	4	0	11	0	0	0	0	1	0	6	1	12	3	4	35	37	12	16	13	9	15	6		Bacteria;Proteobacteria;Alphaproteobacteria;Rhizobiales;Rhizobiales_Incertae_Sedis;Rhizomicrobium;uncultured_bacterium
HWI-M02808_115_AHB9G_1_1103_27873_20424	234	0	0	0	3	0	1	15	0	0	0	0	19	0	0	0	6	0	6	0	1	0	18	0	0	0	0	9	0	10	6	0	37	0	0	0	95	0		Bacteria;Acidobacteria;Acidobacteria;Subgroup_6;Subgroup_6_unclassified;Subgroup_6_unclassified;Subgroup_6_unclassified
HWI-M02808_177_ANHM9_1_1105_11358_10629	233	0	3	53	0	0	116	0	5	56	0	0	0	0	0	0	0	0	0	0	0	0	0	0	0	0	0	0	0	0	0	0	0	0	0	0	0	0		Bacteria;Proteobacteria;Alphaproteobacteria;Rhizobiales;Rhizobiales_Incertae_Sedis;Rhizomicrobium;uncultured_bacterium
HWI-M02808_115_AHB9G_1_1101_27483_20211	233	17	0	0	0	0	0	98	0	0	0	0	4	4	0	0	0	0	0	0	0	0	0	0	5	13	0	1	0	0	11	11	14	11	0	5	0	6		Bacteria;Proteobacteria;Deltaproteobacteria;Myxococcales;Haliangiaceae;Haliangium;Haliangium_unclassified
HWI-M02808_115_AHB9G_1_1101_25330_11327	233	4	0	54	1	10	11	17	6	32	16	33	24	3	0	5	0	0	0	0	0	0	0	0	0	0	0	0	0	0	1	0	0	0	0	0	0	0		Bacteria;Bacteroidetes;Sphingobacteriia;Sphingobacteriales;Sphingobacteriaceae;Mucilaginibacter;Mucilaginibacter_unclassified
HWI-M02808_115_AHB9G_1_1107_7558_5630	233	0	0	0	0	0	0	0	0	0	0	0	0	0	0	0	0	0	0	0	0	0	0	0	0	0	17	9	0	0	0	40	31	68	0	25	32	9		Bacteria;Acidobacteria;Subgroup_22;Subgroup_22_unclassified;Subgroup_22_unclassified;Subgroup_22_unclassified;Subgroup_22_unclassified
HWI-M02808_115_AHB9G_1_1107_11811_20033	233	0	0	0	0	0	0	0	0	0	0	0	0	0	0	0	0	0	0	0	0	0	0	0	0	26	16	0	0	0	0	37	29	55	0	31	17	15		Bacteria;Proteobacteria;Alphaproteobacteria;Rhodospirillales;DA111;uncultured_alpha_proteobacterium;uncultured_alpha_proteobacterium_unclassified
HWI-M02808_115_AHB9G_1_1103_6494_17230	233	0	0	0	0	1	0	0	0	0	0	0	28	0	4	15	10	0	8	0	6	36	0	1	0	0	0	0	2	37	71	1	0	0	0	0	0	0		Bacteria;Bacteroidetes;Cytophagia;Cytophagales;Cytophagaceae;Cytophagaceae_uncultured;Cytophagaceae_unclassified
HWI-M02808_115_AHB9G_1_1102_8185_10686	233	14	2	0	5	11	0	31	0	0	0	11	5	1	0	11	1	1	25	6	0	0	0	0	0	0	0	7	26	12	12	0	4	0	0	8	12	1		Bacteria;Gemmatimonadetes;Gemmatimonadetes;Gemmatimonadales;Gemmatimonadaceae;Gemmatimonadaceae_uncultured;uncultured_alpha_proteobacterium
HWI-M02808_115_AHB9G_1_1101_20138_6612	232	0	0	0	0	1	0	0	0	1	0	0	0	0	0	0	0	1	0	0	7	176	5	24	0	0	0	0	0	0	0	0	0	0	0	0	0	0	CAAT_Inhibited	Bacteria;Cyanobacteria;Chloroplast;Chloroplast_unclassified;Chloroplast_unclassified;Chloroplast_unclassified;Chloroplast_unclassified
HWI-M02808_115_AHB9G_1_1114_16565_8239	232	0	39	24	0	0	0	0	32	32	0	0	0	0	0	0	0	0	0	0	0	0	0	0	0	0	0	0	0	0	0	0	0	0	0	0	0	0		Bacteria;Acidobacteria;Acidobacteria;Acidobacteriales;Acidobacteriaceae_(Subgroup_1);Acidobacteriaceae_(Subgroup_1)_uncultured;uncultured_Acidobacteriaceae_bacterium
HWI-M02808_115_AHB9G_1_1101_19064_7738	232	52	6	39	0	0	0	0	2	0	0	0	0	0	0	0	0	0	0	0	0	0	0	0	0	22	2	9	7	13	30	15	2	0	5	3	0	0		Bacteria;Verrucomicrobia;Opitutae;Opitutae_unclassified;Opitutae_unclassified;Opitutae_unclassified;Opitutae_unclassified
HWI-M02808_177_ANHM9_1_1104_4998_16159	232	0	1	39	0	0	72	0	2	79	8	0	4	6	0	0	0	0	0	0	0	0	0	0	1	0	0	0	0	0	0	0	0	0	0	0	0	0		Bacteria;Proteobacteria;Gammaproteobacteria;Xanthomonadales;Xanthomonadaceae;Xanthomonadaceae_unclassified;Xanthomonadaceae_unclassified
HWI-M02808_177_ANHM9_1_1112_16698_12560	232	0	0	0	0	0	0	0	0	0	0	0	0	0	0	0	0	0	0	0	0	0	0	0	0	0	5	77	46	82	0	6	0	3	0	12	0	0		Bacteria;Proteobacteria;Gammaproteobacteria;Xanthomonadales;Xanthomonadales_Incertae_Sedis;Xanthomonadales_Incertae_Sedis_unclassified;Xanthomonadales_Incertae_Sedis_unclassified
HWI-M02808_177_ANHM9_1_1108_6390_16404	232	0	0	0	0	0	0	0	0	0	0	0	0	0	0	0	0	0	0	0	0	0	0	0	0	0	4	33	23	62	0	17	30	12	0	14	36	0		Bacteria;Bacteroidetes;Sphingobacteriia;Sphingobacteriales;Chitinophagaceae;Ferruginibacter;Ferruginibacter_unclassified
HWI-M02808_115_AHB9G_1_2103_16824_27005	231	0	0	42	70	0	16	3	5	4	0	6	8	2	1	10	6	1	0	3	0	0	0	34	1	0	0	13	0	0	4	0	0	0	0	0	0	0		Bacteria;Acidobacteria;Acidobacteria;Subgroup_3;Unknown_Family;Bryobacter;Bryobacter_unclassified
HWI-M02808_115_AHB9G_1_2105_16328_24668	231	0	0	0	0	0	0	0	0	0	0	0	0	0	1	0	0	0	129	0	0	1	0	55	0	0	0	19	19	0	0	0	0	0	0	0	0	0		Bacteria;Planctomycetes;Planctomycetacia;Planctomycetales;Planctomycetaceae;Planctomycetaceae_uncultured;Planctomycetaceae_unclassified
HWI-M02808_115_AHB9G_1_1102_7139_18868	231	0	0	15	13	49	44	0	0	37	0	13	17	19	0	9	2	1	0	0	0	0	0	1	10	0	0	0	0	0	0	0	0	0	0	0	0	0		Bacteria;Bacteroidetes;Sphingobacteriia;Sphingobacteriales;Sphingobacteriaceae;Mucilaginibacter;Mucilaginibacter_unclassified
HWI-M02808_115_AHB9G_1_1110_13310_20138	231	8	0	0	16	28	50	4	2	6	5	15	3	2	0	23	0	0	5	1	0	0	0	5	6	3	0	0	0	0	20	0	0	0	5	0	0	0		Bacteria;Acidobacteria;Acidobacteria;Acidobacteriales;Acidobacteriaceae_(Subgroup_1);Acidobacteriaceae_(Subgroup_1)_unclassified;Acidobacteriaceae_(Subgroup_1)_unclassified
HWI-M02808_115_AHB9G_1_1102_18201_8419	231	9	4	15	7	15	40	3	2	28	48	21	1	5	0	14	0	0	0	0	0	0	0	0	3	0	0	0	0	0	0	0	0	0	0	0	0	0		Bacteria;Actinobacteria;Actinobacteria;Frankiales;Acidothermaceae;Acidothermus;Acidothermus_unclassified
HWI-M02808_177_ANHM9_1_1102_14218_9904	231	0	126	0	0	0	0	0	105	0	0	0	0	0	0	0	0	0	0	0	0	0	0	0	0	0	0	0	0	0	0	0	0	0	0	0	0	0		Bacteria;Proteobacteria;Alphaproteobacteria;Rhizobiales;alphaI_cluster;alphaI_cluster_unclassified;alphaI_cluster_unclassified
HWI-M02808_115_AHB9G_1_1104_18502_15710	230	0	0	0	7	13	2	4	0	0	0	0	13	8	1	0	36	0	44	1	0	0	3	21	0	0	0	19	9	3	37	0	0	0	0	0	0	0		Bacteria;Bacteroidetes;Sphingobacteriia;Sphingobacteriales;Chitinophagaceae;Parafilimonas;uncultured_bacterium
HWI-M02808_177_ANHM9_1_1112_5722_11170	230	0	0	1	61	27	0	8	0	5	0	0	10	0	0	11	16	4	26	3	0	1	0	0	3	0	1	4	5	0	17	0	0	4	0	0	0	0		Bacteria;Verrucomicrobia;Spartobacteria;Chthoniobacterales;Chthoniobacteraceae;Chthoniobacter;Chthoniobacter_unclassified
HWI-M02808_115_AHB9G_1_1103_4203_17885	230	9	0	0	0	0	0	0	0	0	0	0	34	2	0	0	22	0	23	3	9	57	12	25	0	0	0	8	2	10	1	0	1	0	0	0	0	0		Bacteria;Verrucomicrobia;Spartobacteria;Chthoniobacterales;Chthoniobacteraceae;Chthoniobacter;bacterium_Ellin506
HWI-M02808_115_AHB9G_1_1112_10247_3704	230	0	0	0	0	0	0	0	0	0	0	0	0	0	0	0	0	0	0	0	0	0	0	0	0	9	27	0	3	1	0	10	42	31	0	27	59	9		Bacteria;Proteobacteria;Betaproteobacteria;Nitrosomonadales;Nitrosomonadaceae;Nitrosomonadaceae_uncultured;Nitrosomonadaceae_unclassified
HWI-M02808_115_AHB9G_1_1103_21810_11019	230	1	0	0	11	1	0	0	0	0	0	6	3	7	1	0	0	0	1	0	0	0	1	0	0	23	3	14	15	34	7	38	19	3	11	12	0	3		Bacteria;Planctomycetes;Planctomycetacia;Planctomycetales;Planctomycetaceae;Planctomyces;uncultured_Planctomyces_sp.
HWI-M02808_177_ANHM9_1_1113_25987_13898	230	0	0	0	0	0	0	0	0	0	0	0	0	0	0	0	14	0	0	1	0	6	13	4	0	0	0	36	7	43	0	9	11	23	0	2	44	1		Bacteria;Proteobacteria;Alphaproteobacteria;Sphingomonadales;Sphingomonadaceae;Sphingomonas;Sphingomonas_unclassified
HWI-M02808_115_AHB9G_1_1109_25789_17236	230	4	0	0	43	39	0	20	0	1	0	41	13	6	0	1	15	1	13	3	0	0	3	1	4	0	0	0	0	0	7	0	0	0	0	0	0	0		Bacteria;Proteobacteria;Deltaproteobacteria;Myxococcales;Haliangiaceae;Haliangium;uncultured_bacterium
HWI-M02808_115_AHB9G_1_1101_17935_10228	229	0	0	0	0	0	0	141	0	0	3	0	60	0	0	0	0	0	0	3	0	0	0	0	0	11	0	0	0	0	0	0	0	0	0	0	0	0		Bacteria;Bacteroidetes;Sphingobacteriia;Sphingobacteriales;Sphingobacteriaceae;Mucilaginibacter;uncultured_Mucilaginibacter_sp.
HWI-M02808_115_AHB9G_1_1104_3655_20679	229	12	0	0	0	10	1	0	0	0	0	6	0	0	0	0	0	19	0	7	0	3	1	0	0	52	6	23	11	0	0	6	11	1	0	0	21	29		Bacteria;Proteobacteria;Alphaproteobacteria;Rhizobiales;Rhizobiales_Incertae_Sedis;Rhizomicrobium;Rhizomicrobium_unclassified
HWI-M02808_115_AHB9G_1_2103_7111_5627	229	0	0	0	0	0	0	2	0	0	0	0	29	0	0	0	4	0	0	0	0	0	0	11	0	0	10	30	25	68	32	0	0	3	0	0	11	0		Bacteria;Acidobacteria;Acidobacteria;Subgroup_4;Subgroup_4_uncultured;Subgroup_4_unclassified;Subgroup_4_unclassified
HWI-M02808_115_AHB9G_1_1101_3182_11381	229	200	0	0	0	0	0	12	0	0	0	0	0	0	0	0	0	0	0	0	0	0	0	0	0	11	0	4	0	0	0	0	0	0	0	0	0	0		Bacteria;Acidobacteria;Acidobacteria;Subgroup_3;Unknown_Family;Bryobacter;uncultured_Acidobacteria_bacterium
HWI-M02808_177_ANHM9_1_1102_5667_18987	229	0	0	0	0	0	0	0	0	0	0	0	3	0	1	0	0	0	0	1	1	0	0	0	0	31	21	20	3	3	2	32	23	5	0	46	20	8		Bacteria;Actinobacteria;Thermoleophilia;Gaiellales;Gaiellales_uncultured;Gaiellales_unclassified;Gaiellales_unclassified
HWI-M02808_115_AHB9G_1_1106_28480_17783	229	6	1	0	0	3	0	2	0	0	0	6	3	7	7	0	13	0	6	8	27	20	4	4	4	0	3	15	5	25	22	0	0	0	0	0	0	0		Bacteria;Actinobacteria;Thermoleophilia;Solirubrobacterales;Solirubrobacterales_unclassified;Solirubrobacterales_unclassified;Solirubrobacterales_unclassified
HWI-M02808_177_ANHM9_1_1103_12959_11100	228	0	3	1	10	15	2	3	0	2	1	34	20	3	0	4	5	4	16	0	5	28	0	29	0	0	0	0	5	16	2	0	0	3	10	0	0	0		Bacteria;Cyanobacteria;Chloroplast;Auxenochlorella_protothecoides;Auxenochlorella_protothecoides_unclassified;Auxenochlorella_protothecoides_unclassified;Auxenochlorella_protothecoides_unclassified
HWI-M02808_177_ANHM9_1_1110_9091_20795	228	0	0	0	0	0	0	0	0	0	0	0	0	0	0	0	0	6	0	0	0	0	3	0	0	0	0	0	0	5	213	0	0	0	0	0	0	0	Ground	Bacteria;Chloroflexi;Anaerolineae;Anaerolineales;Anaerolineaceae;Anaerolineaceae_uncultured;uncultured_Gemmatimonadetes_bacterium
HWI-M02808_115_AHB9G_1_1107_10995_9083	228	0	0	0	0	0	4	0	0	0	1	0	0	0	0	11	0	0	0	0	0	0	0	0	0	58	1	0	0	0	0	24	2	5	0	59	16	47		Bacteria;Bacteroidetes;Sphingobacteriia;Sphingobacteriales;Sphingobacteriaceae;Mucilaginibacter;Mucilaginibacter_unclassified
HWI-M02808_115_AHB9G_1_1101_7537_22178	228	0	0	0	0	0	0	0	0	0	0	0	0	0	0	0	0	0	0	0	0	0	0	0	0	18	10	0	0	12	0	0	101	1	0	0	79	1		Bacteria;Proteobacteria;Deltaproteobacteria;Sh765B-TzT-29;uncultured_soil_bacterium;uncultured_soil_bacterium_unclassified;uncultured_soil_bacterium_unclassified
HWI-M02808_115_AHB9G_1_2106_21202_17283	228	7	0	0	6	19	3	10	0	0	0	4	27	24	4	3	22	7	26	4	1	0	3	9	0	5	0	3	5	0	14	0	0	1	4	2	0	0		Bacteria;Planctomycetes;Phycisphaerae;WD2101_soil_group;WD2101_soil_group_unclassified;WD2101_soil_group_unclassified;WD2101_soil_group_unclassified
HWI-M02808_115_AHB9G_1_1101_26433_16765	228	0	0	0	0	0	0	0	0	0	0	0	0	0	0	0	0	0	0	0	0	0	0	0	0	0	0	0	0	0	46	0	0	0	178	0	0	4	Ground	Bacteria;Bacteroidetes;Sphingobacteriia;Sphingobacteriales;Chitinophagaceae;Chitinophagaceae_unclassified;Chitinophagaceae_unclassified
HWI-M02808_177_ANHM9_1_1101_9932_9751	227	0	0	0	0	0	0	0	0	0	0	0	0	0	20	0	0	0	0	0	95	52	4	0	0	0	0	15	0	3	0	0	11	6	0	0	15	1	CAAT_Inhibited	Bacteria;Verrucomicrobia;Opitutae;Opitutales;Opitutaceae;Opitutus;uncultured_Opitutus_sp.
HWI-M02808_115_AHB9G_1_1105_25093_15372	227	6	0	0	0	0	0	0	0	0	0	0	7	0	0	0	55	0	9	1	11	8	0	2	0	0	0	35	0	84	4	0	0	0	1	0	0	0		Bacteria;Planctomycetes;vadinHA49;uncultured_Planctomycetales_bacterium;uncultured_Planctomycetales_bacterium_unclassified;uncultured_Planctomycetales_bacterium_unclassified;uncultured_Planctomycetales_bacterium_unclassified
HWI-M02808_115_AHB9G_1_2114_1803_15353	227	1	9	4	16	6	0	2	0	0	0	42	11	7	0	26	5	6	11	42	0	0	0	0	14	0	0	0	0	0	7	0	0	0	0	0	0	0		Bacteria;Actinobacteria;Thermoleophilia;Solirubrobacterales;YNPFFP1;uncultured_bacterium;uncultured_bacterium_unclassified
HWI-M02808_115_AHB9G_1_1105_14508_2294	227	21	7	5	0	70	0	0	7	0	0	0	0	0	0	0	0	0	0	0	0	0	0	0	0	0	0	0	0	0	0	0	0	0	87	0	0	0		Bacteria;Proteobacteria;Alphaproteobacteria;Rhodospirillales;Acetobacteraceae;Acetobacteraceae_uncultured;Acetobacteraceae_unclassified
HWI-M02808_115_AHB9G_1_1101_5749_9253	226	0	2	0	0	0	0	0	0	0	0	0	0	0	0	8	105	4	0	0	9	0	36	0	0	0	4	0	0	0	0	1	0	0	1	0	0	0	CAAT_Inhibited	Bacteria;Proteobacteria;Betaproteobacteria;Burkholderiales;Comamonadaceae;Comamonadaceae_unclassified;Comamonadaceae_unclassified
HWI-M02808_177_ANHM9_1_1102_7911_13530	226	0	1	4	31	0	18	0	0	7	0	0	0	0	11	15	76	0	0	0	0	0	0	0	22	0	0	0	1	0	2	1	0	0	5	0	0	0		Bacteria;Proteobacteria;Alphaproteobacteria;Rhizobiales;Beijerinckiaceae;Beijerinckiaceae_unclassified;Beijerinckiaceae_unclassified
HWI-M02808_115_AHB9G_1_2108_26724_19823	226	0	0	0	0	0	0	0	0	0	0	0	15	0	0	0	21	1	4	0	2	0	3	5	0	0	1	8	95	17	3	1	18	5	0	1	21	2		Bacteria;Verrucomicrobia;Spartobacteria;Chthoniobacterales;Chthoniobacteraceae;Chthoniobacter;uncultured_bacterium
HWI-M02808_115_AHB9G_1_1114_8105_5120	226	0	0	0	17	0	0	0	0	0	0	6	46	5	9	88	1	0	18	3	1	1	0	0	0	0	0	0	0	0	24	0	0	0	0	0	0	0		Bacteria;Verrucomicrobia;Spartobacteria;Chthoniobacterales;DA101_soil_group;uncultured_Verrucomicrobia_bacterium;uncultured_Verrucomicrobia_bacterium_unclassified
HWI-M02808_115_AHB9G_1_1101_4356_8426	225	0	0	0	0	0	0	0	0	0	0	0	0	0	0	0	0	0	0	0	0	0	0	0	0	55	8	0	0	0	0	27	19	46	0	4	4	62		Bacteria;Acidobacteria;Acidobacteria;Acidobacteriales;Acidobacteriaceae_(Subgroup_1);Acidobacteriaceae_(Subgroup_1)_uncultured;Acidobacteriaceae_(Subgroup_1)_unclassified
HWI-M02808_115_AHB9G_1_1103_21211_8220	225	0	0	0	0	0	0	0	0	0	0	0	0	0	0	0	0	0	0	0	0	0	0	0	0	0	0	0	0	0	0	0	31	0	0	0	188	0	Ground	Bacteria;Actinobacteria;Actinobacteria;Frankiales;Cryptosporangiaceae;Fodinicola;uncultured_bacterium
HWI-M02808_115_AHB9G_1_2109_5465_13254	225	0	0	0	22	16	23	0	0	0	0	0	18	0	0	0	8	0	21	8	2	1	2	18	0	0	0	10	20	9	34	0	0	0	0	0	0	0		Bacteria;Proteobacteria;Alphaproteobacteria;Rhizobiales;alphaI_cluster;uncultured_alpha_proteobacterium;uncultured_alpha_proteobacterium_unclassified
HWI-M02808_177_ANHM9_1_1107_5866_20371	225	0	1	10	23	6	47	3	0	20	15	17	23	4	0	13	7	0	14	0	0	0	0	7	9	1	0	0	0	0	0	0	0	0	0	0	0	0		Bacteria;Verrucomicrobia;Spartobacteria;Chthoniobacterales;Chthoniobacterales_unclassified;Chthoniobacterales_unclassified;Chthoniobacterales_unclassified
HWI-M02808_115_AHB9G_1_1101_27894_8449	225	0	0	0	0	0	0	0	0	0	0	0	0	0	0	0	0	0	0	0	0	0	0	0	0	55	7	0	0	0	0	22	26	25	0	4	2	84		Bacteria;Acidobacteria;Acidobacteria;Acidobacteriales;Acidobacteriaceae_(Subgroup_1);Acidobacteriaceae_(Subgroup_1)_uncultured;uncultured_bacterium
HWI-M02808_115_AHB9G_1_1103_11652_9507	225	3	0	0	2	0	0	0	0	0	0	2	29	4	0	0	16	0	85	5	0	30	0	32	0	0	0	7	0	0	9	0	0	0	0	0	0	0		Bacteria;Verrucomicrobia;Spartobacteria;Chthoniobacterales;DA101_soil_group;uncultured_Verrucomicrobia_bacterium;uncultured_Verrucomicrobia_bacterium_unclassified
HWI-M02808_115_AHB9G_1_1101_23885_15292	224	144	0	0	3	0	0	0	0	0	0	0	38	0	2	0	0	0	1	0	0	7	0	0	0	0	0	11	0	4	1	0	0	3	0	1	0	0		Bacteria;Verrucomicrobia;Spartobacteria;Chthoniobacterales;DA101_soil_group;uncultured_Verrucomicrobia_bacterium;uncultured_Verrucomicrobia_bacterium_unclassified
HWI-M02808_115_AHB9G_1_2104_8116_5940	224	0	0	0	0	0	0	2	0	0	0	66	14	0	0	75	0	0	0	0	0	0	0	0	7	0	0	27	0	16	0	14	0	0	0	0	0	0		Bacteria;Proteobacteria;Alphaproteobacteria;Rhizobiales;Rhizobiales_Incertae_Sedis;Rhizomicrobium;Rhizomicrobium_unclassified
HWI-M02808_115_AHB9G_1_1105_8971_12732	224	13	0	25	57	38	23	0	0	28	0	0	0	1	0	28	0	0	0	4	0	0	0	0	3	0	0	0	0	0	0	0	0	0	0	0	0	0		Bacteria;Proteobacteria;Alphaproteobacteria;Rhizobiales;Rhizobiales_Incertae_Sedis;Rhizomicrobium;Rhizomicrobium_unclassified
HWI-M02808_115_AHB9G_1_1101_11872_8186	224	0	0	7	0	0	0	4	0	0	0	0	207	0	0	0	0	0	0	0	0	0	0	0	0	0	0	1	0	0	0	2	1	0	0	0	2	0	CAAT_Inhibited	Bacteria;Verrucomicrobia;Spartobacteria;Chthoniobacterales;DA101_soil_group;uncultured_Verrucomicrobia_bacterium;uncultured_Verrucomicrobia_bacterium_unclassified
HWI-M02808_115_AHB9G_1_1101_3597_16634	224	0	0	16	56	48	31	3	1	27	18	0	0	2	0	0	0	0	0	0	0	0	0	1	0	0	0	0	0	0	0	0	0	0	0	0	0	0		Bacteria;Proteobacteria;Alphaproteobacteria;Rhodospirillales;Acetobacteraceae;Acetobacteraceae_unclassified;Acetobacteraceae_unclassified
HWI-M02808_115_AHB9G_1_1108_18857_23829	224	6	0	0	2	0	0	0	0	0	0	0	3	0	10	2	9	1	0	4	12	0	19	2	0	0	0	8	15	32	2	0	0	0	0	1	0	0	CAAT_Inhibited	Bacteria;Acidobacteria;Acidobacteria;Subgroup_6;Subgroup_6_unclassified;Subgroup_6_unclassified;Subgroup_6_unclassified
HWI-M02808_177_ANHM9_1_1105_14828_7294	223	0	10	55	0	0	95	0	7	36	5	0	0	0	0	0	0	0	0	0	0	0	0	0	0	0	0	0	0	0	0	0	0	0	0	0	0	1		Bacteria;Proteobacteria;Alphaproteobacteria;Rhizobiales;Rhizobiales_Incertae_Sedis;Rhizomicrobium;Rhizomicrobium_unclassified
HWI-M02808_177_ANHM9_1_1101_7771_14337	223	0	0	14	32	5	5	7	2	0	12	20	7	8	0	14	7	6	4	1	0	0	0	8	9	0	0	6	0	4	11	0	0	0	3	0	0	0		Bacteria;Proteobacteria;Alphaproteobacteria;Rhodospirillales;Acetobacteraceae;Acetobacteraceae_uncultured;Acetobacteraceae_unclassified
HWI-M02808_115_AHB9G_1_1102_8090_7692	223	0	0	0	0	0	0	0	0	0	0	0	0	0	0	0	0	0	0	0	0	0	0	0	0	96	0	2	0	0	0	16	8	25	0	24	4	48		Bacteria;Acidobacteria;Acidobacteria;Subgroup_3;Unknown_Family;Bryobacter;uncultured_Acidobacteria_bacterium
HWI-M02808_115_AHB9G_1_1101_26715_9497	223	36	0	0	0	0	0	0	0	0	0	0	35	0	0	0	0	0	2	0	0	0	0	0	0	7	0	0	4	3	29	29	22	12	0	0	23	15		Bacteria;Gemmatimonadetes;Gemmatimonadetes;Gemmatimonadales;Gemmatimonadaceae;Gemmatimonadaceae_uncultured;Gemmatimonadaceae_unclassified
HWI-M02808_115_AHB9G_1_1101_11831_19434	222	0	0	0	0	0	0	0	0	0	0	0	0	0	0	0	0	0	0	0	0	0	0	0	0	57	0	0	0	0	0	62	19	0	0	43	1	40		Bacteria;Verrucomicrobia;OPB35_soil_group;uncultured_Verrucomicrobia_subdivision_3_bacterium;uncultured_Verrucomicrobia_subdivision_3_bacterium_unclassified;uncultured_Verrucomicrobia_subdivision_3_bacterium_unclassified;uncultured_Verrucomicrobia_subdivision_3_bacterium_unclassified
HWI-M02808_115_AHB9G_1_1108_23412_8256	222	8	5	54	0	0	0	0	0	18	0	0	0	0	0	9	0	0	0	0	0	0	0	0	0	0	0	0	0	0	0	0	0	0	59	0	0	0		Bacteria;Proteobacteria;Alphaproteobacteria;Rhizobiales;Xanthobacteraceae;Variibacter;Variibacter_unclassified
HWI-M02808_177_ANHM9_1_1112_6642_22967	222	0	0	1	23	7	4	9	0	5	0	6	6	0	0	9	15	3	18	3	2	6	0	25	1	0	6	8	15	13	13	0	4	5	2	1	1	0		Bacteria;Proteobacteria;Alphaproteobacteria;Rhizobiales;Bradyrhizobiaceae;Bradyrhizobiaceae_unclassified;Bradyrhizobiaceae_unclassified
HWI-M02808_115_AHB9G_1_1101_21429_27995	222	0	0	0	13	19	3	0	0	0	0	54	32	12	0	2	3	0	32	4	0	0	0	21	10	0	0	4	0	0	5	0	0	0	0	0	0	0		Bacteria;Actinobacteria;Actinobacteria;Pseudonocardiales;Pseudonocardiaceae;Amycolatopsis;Amycolatopsis_saalfeldensis
HWI-M02808_177_ANHM9_1_2108_11095_13552	222	0	3	110	0	0	0	0	7	0	0	0	0	6	0	36	0	0	0	0	0	0	0	0	0	15	2	11	0	0	0	7	0	0	0	3	0	4		Bacteria;Proteobacteria;Deltaproteobacteria;Myxococcales;Polyangiaceae;Sorangium;uncultured_bacterium
HWI-M02808_115_AHB9G_1_1102_24284_10746	221	31	0	1	0	14	0	0	0	0	0	94	5	0	0	0	0	0	49	0	0	0	3	0	0	0	0	3	0	1	10	2	0	0	0	0	0	3		Bacteria;Chloroflexi;KD4-96;uncultured_bacterium;uncultured_bacterium_unclassified;uncultured_bacterium_unclassified;uncultured_bacterium_unclassified
HWI-M02808_177_ANHM9_1_1107_29323_14025	221	0	4	10	9	0	0	0	80	72	1	0	0	0	0	15	0	0	0	0	0	0	0	0	0	0	0	0	0	0	0	0	0	0	0	0	0	0		Bacteria;Planctomycetes;Phycisphaerae;WD2101_soil_group;uncultured_bacterium;uncultured_bacterium_unclassified;uncultured_bacterium_unclassified
HWI-M02808_115_AHB9G_1_1110_25660_12105	221	0	0	0	7	7	3	0	0	0	0	4	2	1	0	2	11	28	7	5	6	36	2	25	1	0	1	3	2	10	10	2	5	11	0	2	13	2		Bacteria;Proteobacteria;Alphaproteobacteria;Rhodospirillales;Acetobacteraceae;Rhodovastum;uncultured_bacterium
HWI-M02808_177_ANHM9_1_2106_14764_16743	221	0	1	0	0	0	0	0	42	178	0	0	0	0	0	0	0	0	0	0	0	0	0	0	0	0	0	0	0	0	0	0	0	0	0	0	0	0		Bacteria;Acidobacteria;Acidobacteria;Acidobacteriales;Acidobacteriaceae_(Subgroup_1);Acidobacteriaceae_(Subgroup_1)_uncultured;Acidobacteriaceae_(Subgroup_1)_unclassified
HWI-M02808_115_AHB9G_1_1101_13661_23464	221	0	0	0	0	0	0	57	0	0	0	0	0	0	0	0	0	0	0	0	0	0	0	0	0	4	0	8	0	0	0	29	16	12	0	66	29	0		Bacteria;Verrucomicrobia;Spartobacteria;Chthoniobacterales;DA101_soil_group;uncultured_Verrucomicrobia_bacterium;uncultured_Verrucomicrobia_bacterium_unclassified
HWI-M02808_115_AHB9G_1_1106_11527_10873	221	0	0	0	0	0	0	0	0	0	0	0	0	0	0	0	0	0	0	0	0	0	0	0	0	0	6	0	0	0	11	4	183	2	2	0	9	0	Ground	Bacteria;Proteobacteria;Deltaproteobacteria;Myxococcales;Sandaracinaceae;Sandaracinaceae_uncultured;Sandaracinaceae_unclassified
HWI-M02808_115_AHB9G_1_1106_22110_21795	221	0	0	0	0	0	0	4	0	0	0	0	8	2	0	0	24	0	105	0	0	13	0	25	0	0	0	15	3	4	18	0	0	0	0	0	0	0		Bacteria;Chloroflexi;Chloroflexia;Chloroflexales;Roseiflexaceae;Roseiflexus;uncultured_bacterium
HWI-M02808_115_AHB9G_1_1105_3435_17565	220	6	0	0	0	0	0	1	0	0	0	0	0	0	24	1	12	0	14	2	21	50	10	0	0	0	0	0	29	0	17	0	0	0	0	0	0	0	CAAT_Inhibited	Bacteria;Proteobacteria;Betaproteobacteria;Burkholderiales;Comamonadaceae;Comamonadaceae_unclassified;Comamonadaceae_unclassified
HWI-M02808_115_AHB9G_1_1101_21184_22554	220	3	0	0	0	0	0	1	0	0	0	0	2	0	33	0	10	0	3	1	13	104	7	13	0	0	0	13	0	0	4	0	0	0	0	0	0	0		Bacteria;Actinobacteria;Actinobacteria;Micromonosporales;Micromonosporaceae;Micromonosporaceae_unclassified;Micromonosporaceae_unclassified
HWI-M02808_115_AHB9G_1_1102_22848_10079	220	0	0	0	0	0	0	0	0	0	0	0	0	0	0	0	0	0	0	0	0	0	0	0	0	46	0	0	0	0	0	0	1	39	0	25	0	109		Bacteria;Verrucomicrobia;Spartobacteria;Chthoniobacterales;DA101_soil_group;uncultured_Spartobacteria_bacterium;uncultured_Spartobacteria_bacterium_unclassified
HWI-M02808_115_AHB9G_1_2105_22812_15903	220	1	0	0	6	1	0	15	0	0	0	0	0	3	4	0	5	0	37	1	0	0	0	3	0	3	4	10	43	8	43	10	0	1	0	0	0	3		Bacteria;Proteobacteria;Deltaproteobacteria;Myxococcales;Myxococcales_unclassified;Myxococcales_unclassified;Myxococcales_unclassified
HWI-M02808_177_ANHM9_1_1101_14154_20319	220	0	3	0	6	3	12	9	0	0	0	6	0	3	0	9	0	1	0	0	1	0	0	0	0	13	0	9	19	18	0	39	15	6	3	10	3	5		Bacteria;Proteobacteria;Deltaproteobacteria;Myxococcales;Haliangiaceae;Haliangium;Haliangium_unclassified
HWI-M02808_115_AHB9G_1_1114_3335_10404	220	8	17	17	4	14	5	1	19	21	5	0	0	0	0	21	0	0	0	0	0	0	0	0	0	8	0	0	9	0	0	5	0	0	10	0	0	8		Bacteria;Proteobacteria;Alphaproteobacteria;Rhodospirillales;Acetobacteraceae;Acidisoma;uncultured_bacterium
HWI-M02808_115_AHB9G_1_2104_12723_23297	220	3	0	0	0	0	0	4	0	0	0	0	39	0	0	0	0	0	0	0	0	0	0	0	0	9	3	20	9	8	32	9	0	0	0	1	12	0	Ground	Bacteria;Actinobacteria;Actinobacteria;Streptosporangiales;Thermomonosporaceae;Actinocorallia;uncultured_bacterium
HWI-M02808_115_AHB9G_1_1108_17593_27562	220	8	0	0	9	0	0	0	0	0	0	0	0	1	0	0	10	0	7	1	1	9	4	12	0	9	9	0	18	12	3	0	23	10	0	38	0	19		Bacteria;Proteobacteria;Alphaproteobacteria;Caulobacterales;Caulobacteraceae;Phenylobacterium;uncultured_alpha_proteobacterium
HWI-M02808_115_AHB9G_1_1113_10368_15054	220	0	0	0	0	0	0	0	0	0	0	0	0	0	0	0	0	0	0	0	0	0	0	0	0	0	21	60	0	2	0	0	32	0	0	44	41	0		Bacteria;Proteobacteria;Betaproteobacteria;Nitrosomonadales;Nitrosomonadaceae;Nitrosomonadaceae_uncultured;Nitrosomonadaceae_unclassified
HWI-M02808_177_ANHM9_1_1102_6426_8091	219	0	2	67	21	0	3	24	1	0	0	0	0	0	0	19	0	33	0	2	0	0	0	0	0	0	1	16	6	0	12	2	0	0	0	0	0	0		Bacteria;Proteobacteria;Alphaproteobacteria;Rhizobiales;Xanthobacteraceae;Xanthobacteraceae_unclassified;Xanthobacteraceae_unclassified
HWI-M02808_115_AHB9G_1_1101_18044_25390	219	0	0	0	93	15	0	14	0	0	6	19	26	8	0	0	0	2	10	0	0	3	0	3	0	0	0	0	0	0	10	0	0	0	0	0	0	0		Bacteria;Acidobacteria;Acidobacteria;Subgroup_3;Unknown_Family;Candidatus_Solibacter;Candidatus_Solibacter_unclassified
HWI-M02808_115_AHB9G_1_2105_14800_11449	219	1	0	0	0	2	0	0	0	0	0	1	12	1	1	1	23	1	9	4	6	63	1	18	0	0	0	16	15	16	25	0	0	2	0	0	0	0		Bacteria;Actinobacteria;Actinobacteria;Pseudonocardiales;Pseudonocardiaceae;Pseudonocardia;Pseudonocardia_unclassified
HWI-M02808_115_AHB9G_1_1105_20582_24740	219	0	0	0	0	0	0	0	0	0	0	0	0	0	0	0	0	0	0	0	0	0	0	0	0	51	7	0	0	0	0	80	6	22	0	37	0	15		Bacteria;Actinobacteria;Actinobacteria;Frankiales;Acidothermaceae;Acidothermus;uncultured_soil_bacterium
HWI-M02808_177_ANHM9_1_1104_11650_13132	219	0	19	0	0	0	0	0	0	0	0	0	0	0	0	0	60	0	21	12	0	1	0	16	0	0	0	8	0	3	65	0	0	0	0	1	0	0		Bacteria;Acidobacteria;Acidobacteria;Acidobacteriales;Acidobacteriaceae_(Subgroup_1);Granulicella;Granulicella_paludicola
HWI-M02808_115_AHB9G_1_1101_25846_17444	219	5	0	0	0	0	0	0	0	0	0	0	1	0	0	0	0	0	0	0	0	0	0	0	0	40	14	0	1	0	0	63	36	20	0	3	14	3		Bacteria;Proteobacteria;Deltaproteobacteria;Myxococcales;BIrii41;uncultured_bacterium;uncultured_bacterium_unclassified
HWI-M02808_115_AHB9G_1_1102_10935_6713	219	11	0	0	0	0	0	7	0	0	0	0	5	7	7	1	8	1	5	3	15	45	26	0	0	0	0	3	5	0	18	0	0	0	0	0	0	0	CAAT_Inhibited	Bacteria;Acidobacteria;Acidobacteria;Subgroup_6;Subgroup_6_unclassified;Subgroup_6_unclassified;Subgroup_6_unclassified
HWI-M02808_115_AHB9G_1_1109_11009_25790	218	4	0	0	0	0	0	0	0	0	0	0	26	6	24	0	7	4	1	0	7	3	44	3	0	0	0	26	30	5	14	0	0	0	0	0	2	0	CAAT_Inhibited	Bacteria;Chloroflexi;Anaerolineae;Anaerolineales;Anaerolineaceae;Anaerolineaceae_uncultured;wastewater_metagenome
HWI-M02808_115_AHB9G_1_1106_10723_15791	218	0	0	0	0	0	0	0	0	0	0	0	0	0	0	0	0	2	0	0	0	0	0	0	0	0	8	93	0	77	0	0	0	35	0	0	0	0		Bacteria;Verrucomicrobia;OPB35_soil_group;OPB35_soil_group_unclassified;OPB35_soil_group_unclassified;OPB35_soil_group_unclassified;OPB35_soil_group_unclassified
HWI-M02808_115_AHB9G_1_1101_9437_16539	218	106	0	0	0	16	0	0	0	0	2	0	1	0	0	0	0	0	0	0	0	0	0	0	0	6	0	0	0	0	0	0	0	0	2	0	0	0		Bacteria;Actinobacteria;Thermoleophilia;Solirubrobacterales;0319-6M6;0319-6M6_unclassified;0319-6M6_unclassified
HWI-M02808_115_AHB9G_1_1102_19561_10798	218	7	0	0	0	0	0	0	0	0	0	0	0	0	0	0	0	0	0	0	0	0	0	0	0	4	3	48	50	43	0	21	22	4	0	0	2	2		Bacteria;Planctomycetes;Pla4_lineage;uncultured_bacterium;uncultured_bacterium_unclassified;uncultured_bacterium_unclassified;uncultured_bacterium_unclassified
HWI-M02808_177_ANHM9_1_2111_22357_14359	217	0	1	0	1	4	0	4	0	0	0	4	12	0	5	4	24	5	4	5	0	3	9	24	2	3	1	12	19	0	26	2	0	2	22	2	0	0		Bacteria;Actinobacteria;Actinobacteria;Micrococcales;Microbacteriaceae;Microbacteriaceae_unclassified;Microbacteriaceae_unclassified
HWI-M02808_115_AHB9G_1_1101_28497_10385	217	3	0	0	0	0	0	3	0	0	0	0	0	0	0	0	0	0	0	0	0	0	0	0	0	61	16	25	0	9	0	19	32	14	0	4	7	2		Bacteria;Proteobacteria;Deltaproteobacteria;Myxococcales;BIrii41;uncultured_bacterium;uncultured_bacterium_unclassified
HWI-M02808_115_AHB9G_1_2101_25537_24922	217	4	1	26	27	0	16	0	0	0	7	0	27	0	7	4	0	0	36	5	0	0	0	33	0	0	0	0	6	2	0	0	0	0	0	0	0	0		Bacteria;Bacteroidetes;Sphingobacteriia;Sphingobacteriales;Chitinophagaceae;Chitinophagaceae_unclassified;Chitinophagaceae_unclassified
HWI-M02808_177_ANHM9_1_1103_5042_6467	217	0	0	0	0	0	0	0	0	0	0	0	4	0	17	0	137	33	3	20	0	0	0	0	0	0	0	2	0	0	0	0	0	0	0	0	0	0	CASE_Unique	Bacteria;Cyanobacteria;Chloroplast;Chloroplast_unclassified;Chloroplast_unclassified;Chloroplast_unclassified;Chloroplast_unclassified
HWI-M02808_115_AHB9G_1_1101_14555_4200	217	88	34	0	0	0	0	6	34	0	0	0	0	0	0	0	0	1	0	0	0	0	0	0	0	0	0	0	0	0	10	0	0	2	0	0	0	0		Bacteria;Proteobacteria;Deltaproteobacteria;Myxococcales;Polyangiaceae;Sorangium;Sorangium_unclassified
HWI-M02808_115_AHB9G_1_1106_25601_16191	217	0	0	0	0	0	0	0	0	0	0	0	0	0	0	0	0	0	0	0	0	0	0	0	0	15	7	35	0	6	0	0	41	35	0	36	18	10		Bacteria;Proteobacteria;Alphaproteobacteria;Rhodospirillales;Rhodospirillaceae;Dongia;Dongia_unclassified
HWI-M02808_115_AHB9G_1_1109_18418_7510	217	0	0	0	1	1	0	9	0	0	0	4	7	0	7	0	0	0	11	0	5	25	4	9	0	7	6	9	14	30	5	4	15	2	0	15	15	1		Bacteria;Actinobacteria;Acidimicrobiia;Acidimicrobiales;Acidimicrobiales_uncultured;uncultured_Ferrimicrobium_sp.;uncultured_Ferrimicrobium_sp._unclassified
HWI-M02808_177_ANHM9_1_2103_12966_21060	217	0	0	28	5	15	11	0	0	33	48	44	0	0	0	0	0	0	0	0	0	0	0	0	0	0	0	0	0	0	0	0	0	0	20	0	0	0		Bacteria;Actinobacteria;Actinobacteria;Frankiales;Acidothermaceae;Acidothermus;uncultured_soil_bacterium
HWI-M02808_115_AHB9G_1_1113_8919_21489	216	6	0	8	2	14	2	11	0	0	0	0	0	0	0	0	4	0	7	0	0	0	0	5	0	22	0	14	3	1	4	22	11	14	11	24	20	10		Bacteria;Actinobacteria;Acidimicrobiia;Acidimicrobiales;Acidimicrobiales_uncultured;Acidimicrobiales_unclassified;Acidimicrobiales_unclassified
HWI-M02808_177_ANHM9_1_2111_19996_6541	216	0	1	28	40	6	29	6	0	27	2	22	10	5	0	5	0	2	0	0	0	0	0	4	7	0	0	0	0	0	0	0	0	0	0	0	0	0		Bacteria;Planctomycetes;vadinHA49;vadinHA49_unclassified;vadinHA49_unclassified;vadinHA49_unclassified;vadinHA49_unclassified
HWI-M02808_115_AHB9G_1_1104_26225_8227	216	0	0	0	0	7	0	0	0	0	0	0	112	2	10	0	10	0	1	10	0	20	0	0	0	0	0	0	7	15	0	0	0	0	0	1	0	0		Bacteria;Verrucomicrobia;Spartobacteria;Chthoniobacterales;DA101_soil_group;DA101_soil_group_unclassified;DA101_soil_group_unclassified
HWI-M02808_115_AHB9G_1_1101_19265_18038	216	127	0	0	0	0	0	7	0	0	0	0	0	2	24	0	1	0	0	1	1	0	1	0	0	0	0	0	20	3	15	0	0	0	0	0	0	0		Bacteria;Acidobacteria;Acidobacteria;Subgroup_4;RB41;RB41_unclassified;RB41_unclassified
HWI-M02808_115_AHB9G_1_1101_27468_20198	215	45	0	0	0	15	0	0	0	0	0	10	7	3	19	2	5	8	14	5	0	8	4	0	0	0	0	1	9	18	11	0	7	0	0	0	0	0		Bacteria;Actinobacteria;Thermoleophilia;Solirubrobacterales;0319-6M6;0319-6M6_unclassified;0319-6M6_unclassified
HWI-M02808_115_AHB9G_1_1102_14052_18826	215	7	0	0	0	0	0	6	0	0	0	0	0	0	0	0	0	0	0	0	0	0	0	1	0	25	7	0	0	13	0	0	24	14	0	49	57	12		Bacteria;Actinobacteria;Actinobacteria;Micromonosporales;Micromonosporaceae;Luedemannella;Luedemannella_unclassified
HWI-M02808_115_AHB9G_1_1108_21871_16752	215	4	0	0	0	0	0	1	0	0	0	0	0	0	0	0	0	0	0	0	0	0	0	0	0	63	9	17	1	20	0	45	11	15	2	7	7	2		Bacteria;Actinobacteria;Actinobacteria;Micromonosporales;Micromonosporaceae;Micromonosporaceae_unclassified;Micromonosporaceae_unclassified
HWI-M02808_115_AHB9G_1_1105_15585_21201	215	0	0	0	0	0	0	0	0	0	0	0	0	0	0	0	1	3	0	0	0	0	0	0	0	4	0	20	12	24	34	11	10	25	0	20	26	18		Bacteria;Proteobacteria;Betaproteobacteria;Burkholderiales;Comamonadaceae;Pelomonas;Pelomonas_unclassified
HWI-M02808_115_AHB9G_1_1102_17140_20610	215	0	0	0	0	0	0	0	0	0	0	0	0	0	0	0	0	0	0	0	0	0	0	0	0	24	0	0	0	0	0	0	28	0	0	29	0	134		Bacteria;Bacteroidetes;Sphingobacteriia;Sphingobacteriales;Chitinophagaceae;Chitinophagaceae_unclassified;Chitinophagaceae_unclassified
HWI-M02808_177_ANHM9_1_1103_24330_18346	215	0	61	33	0	0	0	0	0	14	0	0	0	2	0	30	0	0	0	0	0	0	0	0	5	0	0	0	0	0	0	0	0	0	0	0	0	0		Bacteria;Proteobacteria;Deltaproteobacteria;Myxococcales;Polyangiaceae;Sorangium;uncultured_bacterium
HWI-M02808_177_ANHM9_1_2114_19004_3516	215	0	1	0	7	12	0	0	0	134	0	0	0	0	0	16	0	0	1	0	0	0	0	0	0	1	0	0	0	0	0	0	0	0	14	0	0	1		Bacteria;Verrucomicrobia;Spartobacteria;Chthoniobacterales;Chthoniobacteraceae;Chthoniobacter;Chthoniobacter_unclassified
HWI-M02808_115_AHB9G_1_1103_12664_22796	214	5	0	0	0	0	0	38	0	0	0	0	0	0	0	0	0	1	0	0	0	0	0	0	0	32	0	2	4	5	4	21	24	11	0	17	46	3		Bacteria;Planctomycetes;Planctomycetacia;Planctomycetales;Planctomycetaceae;Pir4_lineage;uncultured_bacterium
HWI-M02808_115_AHB9G_1_1103_2518_18191	214	0	0	0	3	0	0	5	0	0	0	0	3	0	0	0	0	1	2	0	0	0	0	0	0	5	0	35	0	99	8	0	14	9	7	15	0	4		Bacteria;Bacteroidetes;Sphingobacteriia;Sphingobacteriales;Sphingobacteriaceae;Mucilaginibacter;Mucilaginibacter_unclassified
HWI-M02808_115_AHB9G_1_1113_21150_28197	214	1	0	0	0	20	0	30	0	0	0	9	9	3	8	0	0	0	7	0	0	0	0	1	0	0	0	2	39	35	31	0	0	0	0	0	0	0		Bacteria;Proteobacteria;Deltaproteobacteria;Myxococcales;BIrii41;BIrii41_unclassified;BIrii41_unclassified
HWI-M02808_115_AHB9G_1_2105_25193_18788	214	0	0	0	0	0	4	1	0	0	0	0	0	0	0	0	12	0	0	0	1	0	3	14	0	0	1	6	0	0	31	0	7	88	3	0	33	4		Bacteria;Proteobacteria;Alphaproteobacteria;Rhizobiales;Bradyrhizobiaceae;Rhodopseudomonas;Rhodopseudomonas_unclassified
HWI-M02808_177_ANHM9_1_1109_8946_6999	214	0	0	0	46	35	15	8	0	2	4	9	19	21	0	32	0	10	0	0	0	0	0	0	0	0	0	0	0	0	0	0	0	4	0	0	0	0		Bacteria;Acidobacteria;Acidobacteria;Acidobacteriales;Acidobacteriaceae_(Subgroup_1);Granulicella;Granulicella_paludicola
HWI-M02808_115_AHB9G_1_1103_16358_6571	214	13	2	3	3	0	2	7	0	5	0	4	13	0	0	8	9	5	18	8	0	16	2	38	4	0	0	9	9	7	14	0	0	0	0	0	0	1		Bacteria;Proteobacteria;Alphaproteobacteria;Rhodospirillales;Acetobacteraceae;Acetobacteraceae_unclassified;Acetobacteraceae_unclassified
HWI-M02808_115_AHB9G_1_1101_10068_3783	214	0	0	0	0	0	0	0	0	0	0	0	0	0	0	0	0	0	0	0	0	0	0	0	0	0	0	0	0	0	0	0	0	0	214	0	0	0	GRFL_Unique	Bacteria;Acidobacteria;Acidobacteria;Subgroup_3;Unknown_Family;Bryobacter;uncultured_bacterium
HWI-M02808_115_AHB9G_1_1101_11732_13169	214	104	0	0	0	0	0	0	0	0	0	2	41	0	5	0	14	0	4	0	3	0	1	0	0	0	0	8	0	0	14	0	0	0	0	0	0	0		Bacteria;Proteobacteria;Deltaproteobacteria;Myxococcales;Haliangiaceae;Haliangium;Haliangium_unclassified
HWI-M02808_115_AHB9G_1_1106_16426_28397	214	4	7	0	0	52	0	9	0	0	42	0	0	0	0	24	0	0	0	0	0	0	0	0	0	0	0	0	0	0	0	0	0	0	0	0	0	0		Bacteria;WD272;uncultured_bacterium;uncultured_bacterium_unclassified;uncultured_bacterium_unclassified;uncultured_bacterium_unclassified;uncultured_bacterium_unclassified
HWI-M02808_115_AHB9G_1_1102_15979_23884	213	0	0	17	0	20	11	0	0	6	6	16	0	0	0	33	0	0	0	0	0	0	0	0	0	19	1	0	8	0	0	1	38	0	0	0	27	6		Bacteria;Actinobacteria;Actinobacteria;Corynebacteriales;Mycobacteriaceae;Mycobacterium;Mycobacterium_unclassified
HWI-M02808_115_AHB9G_1_2103_11513_15130	213	0	0	11	0	0	0	0	0	5	2	0	0	1	0	0	0	0	0	0	0	0	0	0	0	0	0	0	0	0	0	0	0	0	175	0	0	19	Ground	Bacteria;Proteobacteria;Alphaproteobacteria;Rhizobiales;alphaI_cluster;alphaI_cluster_unclassified;alphaI_cluster_unclassified
HWI-M02808_115_AHB9G_1_1101_10924_5738	213	40	0	0	15	7	5	1	0	0	0	65	8	0	3	17	5	0	4	1	0	7	0	10	1	1	0	0	1	0	3	1	0	0	16	0	0	0		Bacteria;Actinobacteria;Actinobacteria;Pseudonocardiales;Pseudonocardiaceae;Pseudonocardia;Pseudonocardia_unclassified
HWI-M02808_115_AHB9G_1_1104_9662_18687	213	24	3	2	3	67	0	27	0	3	4	8	8	1	0	0	0	0	1	0	0	0	0	0	0	7	0	0	0	0	22	0	0	0	17	0	0	0		Bacteria;Acidobacteria;Acidobacteria;Subgroup_3;Unknown_Family;Bryobacter;uncultured_Acidobacteria_bacterium
HWI-M02808_177_ANHM9_1_1102_27880_9922	213	0	2	0	19	9	24	0	0	0	5	10	10	6	0	56	11	12	5	0	0	0	0	7	0	0	0	0	3	0	9	1	4	12	2	0	0	1		Bacteria;Verrucomicrobia;Verrucomicrobia_Incertae_Sedis;Unknown_Order;Unknown_Family;Candidatus_Methylacidiphilum;uncultured_bacterium
HWI-M02808_177_ANHM9_1_1102_13336_20990	213	0	26	34	0	5	5	0	16	0	17	0	21	0	0	9	1	0	0	0	0	0	0	0	0	15	0	0	0	0	0	0	0	0	0	0	0	0		Bacteria;Proteobacteria;Alphaproteobacteria;Alphaproteobacteria_unclassified;Alphaproteobacteria_unclassified;Alphaproteobacteria_unclassified;Alphaproteobacteria_unclassified
HWI-M02808_115_AHB9G_1_1102_18523_7218	213	0	0	0	0	0	0	0	0	0	0	0	0	0	0	0	0	0	0	0	0	0	0	0	0	13	0	0	0	0	0	4	0	6	92	0	0	98		Bacteria;Bacteroidetes;Sphingobacteriia;Sphingobacteriales;Chitinophagaceae;Chitinophagaceae_unclassified;Chitinophagaceae_unclassified
HWI-M02808_115_AHB9G_1_1103_14636_5459	213	42	1	0	0	12	0	23	0	0	0	0	0	0	0	1	0	0	0	0	0	0	0	0	0	90	0	0	0	0	3	0	0	0	27	0	0	4		Bacteria;Acidobacteria;Acidobacteria;Acidobacteriales;Acidobacteriaceae_(Subgroup_1);Acidobacteriaceae_(Subgroup_1)_uncultured;Acidobacteriaceae_(Subgroup_1)_unclassified
HWI-M02808_115_AHB9G_1_1107_22772_17865	213	0	0	0	0	0	0	0	0	0	0	0	0	0	0	0	0	0	0	0	0	0	0	0	0	0	0	0	0	0	0	51	32	21	0	31	0	78		Bacteria;Proteobacteria;Betaproteobacteria;Nitrosomonadales;Nitrosomonadaceae;Nitrosomonadaceae_uncultured;uncultured_Rhodocyclaceae_bacterium
HWI-M02808_115_AHB9G_1_1105_25657_10484	213	6	0	0	0	0	0	4	0	0	0	4	6	3	3	0	15	0	2	4	0	9	6	19	0	2	12	0	9	3	14	21	9	17	0	8	8	15		Bacteria;Proteobacteria;Betaproteobacteria;Burkholderiales;Comamonadaceae;Comamonadaceae_unclassified;Comamonadaceae_unclassified
HWI-M02808_177_ANHM9_1_1101_21632_11617	213	0	0	73	13	9	17	17	1	9	2	6	6	3	0	8	20	0	0	0	0	0	0	9	0	0	0	0	1	0	6	0	0	0	6	0	0	1		Bacteria;Acidobacteria;Acidobacteria;Acidobacteriales;Acidobacteriaceae_(Subgroup_1);Acidobacteriaceae_(Subgroup_1)_unclassified;Acidobacteriaceae_(Subgroup_1)_unclassified
HWI-M02808_115_AHB9G_1_2104_3982_19601	212	0	4	22	11	15	13	18	2	0	0	13	10	0	4	16	4	0	2	3	0	0	0	4	1	2	0	0	0	0	7	0	0	5	21	0	2	5		Bacteria;Proteobacteria;Deltaproteobacteria;Myxococcales;Polyangiaceae;Polyangiaceae_unclassified;Polyangiaceae_unclassified
HWI-M02808_115_AHB9G_1_1103_16940_10287	212	0	0	0	0	0	0	0	0	0	0	0	0	0	0	0	0	0	0	0	0	0	0	0	0	0	12	0	0	0	0	0	43	71	0	49	21	16		Bacteria;Nitrospirae;Nitrospira;Nitrospirales;Nitrospiraceae;Nitrospira;uncultured_Nitrospiraceae_bacterium
HWI-M02808_115_AHB9G_1_1109_10539_16350	212	0	0	0	0	0	0	0	0	0	0	0	0	0	0	0	0	0	0	0	0	0	0	0	0	14	7	65	0	5	0	44	9	16	0	32	0	9		Bacteria;Proteobacteria;Gammaproteobacteria;Xanthomonadales;Xanthomonadales_Incertae_Sedis;Acidibacter;Acidibacter_unclassified
HWI-M02808_115_AHB9G_1_1102_6210_7359	211	14	0	0	0	10	0	0	0	0	0	19	18	0	8	2	0	0	17	7	7	5	4	0	0	0	0	2	32	11	17	0	0	0	0	0	0	0		Bacteria;Gemmatimonadetes;Gemmatimonadetes;Gemmatimonadales;Gemmatimonadaceae;Gemmatimonadaceae_uncultured;Gemmatimonadaceae_unclassified
HWI-M02808_115_AHB9G_1_1101_22490_19373	211	0	0	23	0	10	45	2	0	25	0	21	5	0	0	29	1	0	9	0	0	2	0	1	0	1	0	0	0	1	0	0	0	0	19	0	4	13		Bacteria;Acidobacteria;Acidobacteria;Subgroup_3;Unknown_Family;Candidatus_Solibacter;uncultured_Acidobacteriaceae_bacterium
HWI-M02808_115_AHB9G_1_1105_3558_13621	211	0	0	0	0	15	7	17	0	0	0	0	18	0	0	6	19	9	28	0	1	0	0	56	0	0	0	7	0	3	0	0	0	0	0	0	0	0		Bacteria;Proteobacteria;Alphaproteobacteria;Rhizobiales;Rhizobiales_Incertae_Sedis;Rhizomicrobium;Rhizomicrobium_unclassified
HWI-M02808_115_AHB9G_1_1101_11414_28594	211	10	0	0	0	13	0	3	0	0	0	3	9	3	5	6	16	6	21	11	0	5	5	33	0	7	0	6	0	8	12	0	4	0	0	1	1	0		Bacteria;Actinobacteria;Actinobacteria;Corynebacteriales;Mycobacteriaceae;Mycobacterium;Mycobacterium_unclassified
HWI-M02808_115_AHB9G_1_1107_19523_27928	211	11	0	0	0	0	0	15	0	0	4	22	0	15	4	2	13	0	24	28	0	0	9	7	0	0	0	0	8	0	0	1	0	0	0	0	0	0		Bacteria;Actinobacteria;Thermoleophilia;Solirubrobacterales;Patulibacteraceae;Patulibacter;uncultured_bacterium
HWI-M02808_115_AHB9G_1_2114_22705_24693	211	0	0	0	0	0	0	0	0	0	0	0	0	0	0	0	0	0	0	0	0	0	0	0	0	2	4	58	16	17	0	37	7	23	0	33	8	3		Bacteria;Bacteroidetes;Flavobacteriia;Flavobacteriales;Flavobacteriaceae;Flavobacterium;uncultured_Flavobacteriaceae_bacterium
HWI-M02808_115_AHB9G_1_1107_22197_11159	210	1	0	0	2	0	0	1	0	0	0	0	31	1	3	2	15	1	18	0	6	60	4	0	0	0	1	1	5	4	3	0	12	7	0	2	15	12		Bacteria;Chloroflexi;Anaerolineae;Anaerolineales;Anaerolineaceae;Anaerolineaceae_uncultured;wastewater_metagenome
HWI-M02808_115_AHB9G_1_1101_4879_8690	210	21	0	0	0	0	0	0	0	0	0	0	0	0	0	0	3	0	7	0	3	34	9	0	0	6	7	0	51	33	0	0	0	6	0	13	12	0		Bacteria;Proteobacteria;Deltaproteobacteria;Myxococcales;Polyangiaceae;Byssovorax;Byssovorax_unclassified
HWI-M02808_177_ANHM9_1_1112_20787_9273	210	0	0	0	11	1	0	31	0	0	0	5	11	6	1	3	39	0	21	9	0	2	2	20	4	0	0	1	0	0	28	0	0	0	0	0	0	0		Bacteria;Verrucomicrobia;Spartobacteria;Chthoniobacterales;Chthoniobacteraceae;Chthoniobacter;Chthoniobacter_unclassified
HWI-M02808_115_AHB9G_1_1103_21383_18508	210	42	61	0	0	0	0	0	0	0	0	0	0	0	0	0	0	0	0	0	0	0	0	0	0	1	0	0	0	0	0	0	0	2	79	0	0	2		Bacteria;Verrucomicrobia;Opitutae;Opitutales;Opitutaceae;Opitutus;uncultured_bacterium
HWI-M02808_115_AHB9G_1_1101_19624_10295	210	0	0	0	0	0	0	0	0	0	0	0	0	0	0	0	0	0	0	0	0	0	0	0	0	0	0	0	0	0	25	22	64	39	0	0	38	22		Bacteria;Proteobacteria;Gammaproteobacteria;Xanthomonadales;Xanthomonadales_Incertae_Sedis;Steroidobacter;bacterium_MI-37
HWI-M02808_115_AHB9G_1_1101_29034_18374	209	0	0	0	0	0	0	0	0	0	0	0	0	0	0	0	0	0	0	0	0	0	0	0	0	0	0	0	0	0	0	0	0	0	209	0	0	0	GRFL_Unique	Bacteria;Verrucomicrobia;OPB35_soil_group;uncultured_bacterium;uncultured_bacterium_unclassified;uncultured_bacterium_unclassified;uncultured_bacterium_unclassified
HWI-M02808_115_AHB9G_1_1101_9755_15598	209	31	1	0	0	30	0	14	0	0	0	1	0	0	0	0	0	1	0	2	0	0	0	0	0	17	0	0	2	0	23	18	0	25	0	0	0	34		Bacteria;Elusimicrobia;Elusimicrobia;Lineage_IIa;Lineage_IIa_unclassified;Lineage_IIa_unclassified;Lineage_IIa_unclassified
HWI-M02808_177_ANHM9_1_1102_14706_11730	209	0	0	0	0	0	0	197	0	0	0	0	0	0	0	0	0	0	4	0	0	0	0	0	0	0	0	0	0	0	0	0	0	0	0	0	8	0		Bacteria;Acidobacteria;Acidobacteria;Acidobacteriales;Acidobacteriaceae_(Subgroup_1);Acidobacteriaceae_(Subgroup_1)_uncultured;Acidobacteriaceae_(Subgroup_1)_unclassified
HWI-M02808_115_AHB9G_1_1101_6388_17740	209	0	0	153	0	0	0	8	2	1	10	0	2	0	0	0	0	0	0	6	0	0	0	6	0	0	0	0	0	0	0	0	0	0	0	0	0	0		Bacteria;Bacteroidetes;Sphingobacteriia;Sphingobacteriales;Sphingobacteriaceae;Mucilaginibacter;Mucilaginibacter_unclassified
HWI-M02808_177_ANHM9_1_1113_19447_19063	208	0	0	0	0	0	0	0	0	0	0	0	0	0	0	0	0	0	2	0	0	1	0	0	0	0	3	46	19	49	4	0	29	17	0	29	5	0		Bacteria;Bacteroidetes;Sphingobacteriia;Sphingobacteriales;Chitinophagaceae;Sediminibacterium;uncultured_organism
HWI-M02808_115_AHB9G_1_1102_13054_23198	208	0	0	0	0	0	0	0	0	0	0	2	5	1	0	0	6	0	60	8	0	0	4	74	0	0	0	11	1	18	15	0	0	0	0	0	0	0		Bacteria;Bacteroidetes;Sphingobacteriia;Sphingobacteriales;Chitinophagaceae;Chitinophagaceae_unclassified;Chitinophagaceae_unclassified
HWI-M02808_177_ANHM9_1_2113_11411_8497	208	0	0	0	0	0	0	0	0	0	0	0	0	0	0	0	0	0	0	0	0	0	0	0	0	0	3	0	0	156	0	0	17	0	0	0	25	0	Ground	Bacteria;Bacteroidetes;Sphingobacteriia;Sphingobacteriales;Chitinophagaceae;Parafilimonas;Parafilimonas_unclassified
HWI-M02808_115_AHB9G_1_1114_19476_21278	208	0	0	0	11	5	2	0	0	18	0	0	30	0	3	27	32	4	31	3	0	0	2	6	6	0	0	0	0	14	8	0	0	1	0	0	0	0		Bacteria;Verrucomicrobia;Spartobacteria;Chthoniobacterales;Xiphinematobacteraceae;Candidatus_Xiphinematobacter;Candidatus_Xiphinematobacter_unclassified
HWI-M02808_177_ANHM9_1_1103_5011_11611	208	0	0	0	0	0	0	8	0	0	0	25	0	4	0	0	1	0	33	7	0	0	0	16	0	0	4	10	22	10	24	5	1	0	5	0	0	2		Bacteria;Actinobacteria;Thermoleophilia;Solirubrobacterales;Solirubrobacteraceae;Solirubrobacter;uncultured_bacterium
HWI-M02808_115_AHB9G_1_2107_20860_11209	208	4	0	0	0	0	0	0	0	0	0	0	1	0	0	0	0	0	0	0	0	0	0	0	0	59	3	0	0	0	0	80	13	14	0	5	23	0		Bacteria;Verrucomicrobia;Opitutae;Opitutales;Opitutaceae;Opitutus;uncultured_bacterium
HWI-M02808_115_AHB9G_1_1102_16640_20568	208	4	0	19	18	12	1	11	0	2	6	2	10	12	1	6	13	7	5	6	0	0	2	24	6	2	0	0	0	3	30	0	0	0	0	0	0	0		Bacteria;Verrucomicrobia;Spartobacteria;Chthoniobacterales;Chthoniobacteraceae;Chthoniobacter;uncultured_bacterium
HWI-M02808_115_AHB9G_1_1105_13548_13063	208	3	0	0	0	0	0	0	0	0	0	2	15	1	20	0	11	1	0	7	8	4	24	2	0	0	0	8	63	5	4	0	2	9	0	0	0	0		Bacteria;Chloroflexi;Anaerolineae;Anaerolineales;Anaerolineaceae;Anaerolineaceae_uncultured;uncultured_Gemmatimonadetes_bacterium
HWI-M02808_115_AHB9G_1_1114_18781_14114	207	4	6	23	12	0	32	7	0	7	0	23	1	16	0	12	4	0	0	3	0	0	0	1	3	2	0	1	0	0	2	0	0	0	15	0	0	0		Bacteria;Proteobacteria;Alphaproteobacteria;Caulobacterales;Caulobacteraceae;Caulobacteraceae_uncultured;Caulobacteraceae_unclassified
HWI-M02808_115_AHB9G_1_1107_24767_9562	207	0	0	0	0	0	0	0	0	0	0	0	0	0	0	0	0	0	0	0	0	0	0	0	0	23	0	0	0	0	0	4	0	0	135	0	0	45		Bacteria;Acidobacteria;Acidobacteria;Subgroup_2;Subgroup_2_unclassified;Subgroup_2_unclassified;Subgroup_2_unclassified
HWI-M02808_177_ANHM9_1_2108_24452_9391	207	0	3	35	0	0	0	3	65	49	1	0	0	0	0	0	0	0	0	0	0	0	0	0	0	0	0	0	0	0	0	0	0	0	3	0	0	0		Bacteria;Actinobacteria;Actinobacteria;Frankiales;Acidothermaceae;Acidothermus;uncultured_soil_bacterium
HWI-M02808_177_ANHM9_1_1103_22674_9407	207	0	0	98	21	0	2	16	0	0	1	10	6	0	0	3	10	1	16	0	0	0	0	0	1	0	0	0	0	6	11	0	0	0	0	0	0	0		Bacteria;Bacteroidetes;Sphingobacteriia;Sphingobacteriales;Sphingobacteriaceae;Mucilaginibacter;Mucilaginibacter_unclassified
HWI-M02808_115_AHB9G_1_1101_23694_20132	206	63	0	0	0	0	0	1	0	0	0	0	7	0	0	0	2	1	17	5	1	0	0	0	0	5	3	3	28	21	38	2	2	1	0	0	0	0		Bacteria;Chloroflexi;Chloroflexi_unclassified;Chloroflexi_unclassified;Chloroflexi_unclassified;Chloroflexi_unclassified;Chloroflexi_unclassified
HWI-M02808_115_AHB9G_1_1105_29322_13462	206	9	0	0	0	4	0	3	0	2	0	0	0	3	0	0	7	0	47	5	5	48	7	8	0	1	0	16	2	0	4	0	9	0	0	0	17	1		Bacteria;Bacteroidetes;Sphingobacteriia;Sphingobacteriales;Chitinophagaceae;Ferruginibacter;uncultured_Bacteroidetes_bacterium
HWI-M02808_177_ANHM9_1_2107_15534_13718	206	0	0	0	0	0	0	0	0	0	0	0	0	0	0	0	0	0	0	0	1	0	0	0	0	0	7	70	0	30	0	0	15	14	0	52	3	8		Bacteria;Bacteroidetes;Sphingobacteriia;Sphingobacteriales;Chitinophagaceae;Chitinophagaceae_unclassified;Chitinophagaceae_unclassified
HWI-M02808_115_AHB9G_1_1101_13470_11833	206	0	0	0	5	0	0	0	0	0	0	0	36	0	0	0	47	0	29	0	1	34	1	31	0	0	0	2	0	0	20	0	0	0	0	0	0	0		Bacteria;Proteobacteria;Alphaproteobacteria;Rhizobiales;Rhizobiales_Incertae_Sedis;Rhizomicrobium;uncultured_bacterium
HWI-M02808_115_AHB9G_1_1102_27026_9448	206	0	0	0	0	16	2	36	0	0	0	7	0	5	14	5	0	0	0	0	0	8	0	48	4	0	1	8	0	0	28	0	0	0	0	0	0	0		Bacteria;Verrucomicrobia;Opitutae;Opitutales;Opitutaceae;Opitutus;uncultured_bacterium
HWI-M02808_115_AHB9G_1_1104_6440_21130	206	0	0	0	0	3	0	5	0	0	0	0	5	0	0	0	0	1	15	0	0	1	0	13	0	15	7	5	5	7	6	23	11	16	1	17	21	21		Bacteria;Actinobacteria;Actinobacteria;Frankiales;Frankiales_unclassified;Frankiales_unclassified;Frankiales_unclassified
HWI-M02808_115_AHB9G_1_1106_2211_12376	206	0	0	0	0	3	0	35	0	0	0	0	9	0	0	5	64	3	36	0	0	0	0	38	1	0	0	11	0	0	0	0	0	0	1	0	0	0		Bacteria;Actinobacteria;Actinobacteria;Pseudonocardiales;Pseudonocardiaceae;Pseudonocardia;Pseudonocardia_unclassified
HWI-M02808_115_AHB9G_1_1101_14999_10062	205	189	0	0	0	0	0	0	0	0	0	0	0	0	0	2	0	0	0	0	0	0	2	0	0	0	0	0	0	0	0	0	3	0	0	0	4	0		Bacteria;Acidobacteria;Holophagae;Subgroup_7;Subgroup_7_unclassified;Subgroup_7_unclassified;Subgroup_7_unclassified
HWI-M02808_115_AHB9G_1_1103_14479_6300	205	8	0	0	0	24	0	2	0	0	0	33	9	3	6	0	5	0	27	3	0	0	4	14	0	0	0	0	0	2	16	0	0	0	0	0	0	0		Bacteria;Actinobacteria;Thermoleophilia;Solirubrobacterales;Solirubrobacterales_unclassified;Solirubrobacterales_unclassified;Solirubrobacterales_unclassified
HWI-M02808_115_AHB9G_1_1110_24516_22869	205	2	0	0	0	0	0	8	1	0	0	0	15	4	7	2	21	0	7	7	5	32	36	1	0	0	0	0	0	1	0	0	2	18	0	0	0	0	CASE_Unique	Bacteria;Proteobacteria;Alphaproteobacteria;Sphingomonadales;Sphingomonadaceae;Sphingomonas;Sphingomonas_unclassified
HWI-M02808_177_ANHM9_1_1106_13440_7370	205	0	0	0	0	158	0	0	0	0	0	15	27	0	0	0	0	0	0	0	0	0	0	0	0	0	0	0	0	0	0	0	0	0	0	0	0	1		Bacteria;Actinobacteria;Thermoleophilia;Solirubrobacterales;TM146;TM146_unclassified;TM146_unclassified
HWI-M02808_115_AHB9G_1_1105_17459_18586	205	0	0	0	0	0	0	0	0	0	0	0	0	0	0	0	0	0	0	0	0	0	0	0	0	13	16	12	0	0	0	0	0	22	0	139	2	1		Bacteria;Actinobacteria;Thermoleophilia;Gaiellales;Gaiellaceae;Gaiella;uncultured_Conexibacteraceae_bacterium
HWI-M02808_177_ANHM9_1_1101_7244_19744	204	0	0	0	0	38	0	18	0	0	3	0	0	12	0	0	0	0	37	5	0	0	0	3	6	0	0	0	0	0	28	0	0	0	0	0	0	0		Bacteria;Acidobacteria;Holophagae;Subgroup_7;Subgroup_7_unclassified;Subgroup_7_unclassified;Subgroup_7_unclassified
HWI-M02808_177_ANHM9_1_1111_15709_16975	204	0	0	0	0	0	0	0	125	0	0	0	0	0	0	0	0	0	0	0	0	0	0	0	0	0	0	0	0	0	0	2	0	7	0	0	0	28		Bacteria;Planctomycetes;Phycisphaerae;WD2101_soil_group;uncultured_bacterium;uncultured_bacterium_unclassified;uncultured_bacterium_unclassified
HWI-M02808_115_AHB9G_1_1105_15199_8663	204	17	0	0	7	10	1	9	0	0	0	13	2	5	1	7	0	0	16	6	0	0	0	51	2	7	0	1	4	7	11	2	0	0	0	0	0	0		Bacteria;Proteobacteria;Deltaproteobacteria;Myxococcales;Polyangiaceae;Sorangium;Sorangium_unclassified
HWI-M02808_115_AHB9G_1_1104_20542_5275	204	0	0	0	0	0	0	0	0	0	0	0	0	0	0	0	0	0	0	0	0	0	0	0	0	25	0	3	0	0	0	41	7	66	0	0	0	57		Bacteria;Acidobacteria;Acidobacteria;Acidobacteriales;Acidobacteriaceae_(Subgroup_1);Acidobacteriaceae_(Subgroup_1)_unclassified;Acidobacteriaceae_(Subgroup_1)_unclassified
HWI-M02808_177_ANHM9_1_1103_5494_17456	204	0	0	0	0	0	0	0	0	0	0	0	0	148	0	0	1	0	0	0	0	0	0	18	0	6	0	0	0	9	3	0	0	15	0	0	0	0	CAAT_Inhibited	Bacteria;Bacteroidetes;Sphingobacteriia;Sphingobacteriales;Sphingobacteriaceae;Pedobacter;Pedobacter_unclassified
HWI-M02808_115_AHB9G_1_1101_6243_9378	204	12	0	11	0	0	0	0	0	5	0	0	0	0	0	1	0	0	0	0	0	0	0	2	0	0	0	0	1	0	0	172	0	0	0	0	0	0	Ground	Bacteria;Cyanobacteria;Chloroplast;Chloroplast_unclassified;Chloroplast_unclassified;Chloroplast_unclassified;Chloroplast_unclassified
HWI-M02808_115_AHB9G_1_1103_21269_19611	204	0	0	0	0	0	0	0	0	0	0	4	9	0	10	0	19	0	0	0	10	6	0	3	0	0	0	29	32	17	0	4	25	17	0	0	5	0		Bacteria;Proteobacteria;Deltaproteobacteria;Myxococcales;BIrii41;BIrii41_unclassified;BIrii41_unclassified
HWI-M02808_115_AHB9G_1_1114_7105_16867	204	6	0	53	10	17	5	7	6	4	0	0	21	0	5	0	20	0	0	0	0	0	0	0	0	1	4	0	0	0	25	0	0	0	9	0	0	0		Bacteria;Elusimicrobia;Elusimicrobia;Elusimicrobia_unclassified;Elusimicrobia_unclassified;Elusimicrobia_unclassified;Elusimicrobia_unclassified
HWI-M02808_115_AHB9G_1_1106_27972_11913	203	10	1	0	1	18	0	20	0	0	0	30	19	4	0	0	3	12	0	3	0	7	0	4	0	0	1	0	0	4	12	0	0	0	0	0	0	0		Bacteria;Actinobacteria;Thermoleophilia;Solirubrobacterales;0319-6M6;uncultured_actinobacterium;uncultured_actinobacterium_unclassified
HWI-M02808_177_ANHM9_1_1112_17369_16070	203	0	4	14	0	0	79	0	13	40	15	4	0	0	0	22	0	0	0	0	0	0	0	0	1	0	0	0	0	0	0	0	0	0	0	0	0	0		Bacteria;Proteobacteria;Deltaproteobacteria;Myxococcales;Polyangiaceae;Sorangium;uncultured_bacterium
HWI-M02808_177_ANHM9_1_1104_14098_2763	203	0	0	0	0	0	0	0	0	0	0	0	7	0	0	1	7	3	0	1	0	0	14	57	0	0	0	3	0	17	3	3	0	0	0	0	0	0	CAAT_Inhibited	Bacteria;Acidobacteria;Holophagae;Subgroup_10;ABS-19;ABS-19_unclassified;ABS-19_unclassified
HWI-M02808_115_AHB9G_1_1101_14026_15502	203	69	0	0	18	0	0	0	0	0	0	101	0	0	1	0	0	0	0	0	0	0	0	0	0	0	0	0	0	0	0	0	0	0	0	0	0	0		Bacteria;Acidobacteria;Acidobacteria;Subgroup_6;Subgroup_6_unclassified;Subgroup_6_unclassified;Subgroup_6_unclassified
HWI-M02808_115_AHB9G_1_1102_16109_21516	203	26	0	0	0	0	0	0	0	0	0	0	1	0	3	0	12	0	0	1	0	14	3	1	0	2	1	46	16	9	12	4	20	0	0	3	16	0		Bacteria;Proteobacteria;Alphaproteobacteria;Rhizobiales;Rhizobiales_Incertae_Sedis;Nordella;uncultured_bacterium
HWI-M02808_115_AHB9G_1_1113_19969_10748	203	0	0	0	0	0	0	0	0	0	0	0	0	0	0	0	146	0	0	0	0	0	2	0	1	0	0	0	0	0	1	0	0	0	0	0	0	0	CAAT_Inhibited	Bacteria;Bacteroidetes;Sphingobacteriia;Sphingobacteriales;Chitinophagaceae;Flavisolibacter;Flavisolibacter_unclassified
HWI-M02808_115_AHB9G_1_1102_3917_19883	203	0	0	0	0	0	0	0	0	0	0	0	0	0	0	0	0	0	0	0	0	0	0	0	0	11	29	20	0	0	0	31	47	23	0	17	10	0		Bacteria;Gemmatimonadetes;Gemmatimonadetes;Gemmatimonadales;Gemmatimonadaceae;Gemmatimonadaceae_uncultured;Gemmatimonadaceae_unclassified
HWI-M02808_115_AHB9G_1_1101_28459_19135	203	0	0	0	0	0	0	0	0	0	0	0	0	0	0	0	0	0	0	0	0	0	0	0	0	17	6	0	0	0	0	139	13	11	0	4	11	2		Bacteria;Proteobacteria;Deltaproteobacteria;Myxococcales;Haliangiaceae;Haliangium;Haliangium_unclassified
HWI-M02808_115_AHB9G_1_1101_17804_4705	202	0	0	0	0	0	0	199	0	0	0	0	0	0	0	0	0	0	0	0	0	0	0	0	0	0	0	0	1	0	2	0	0	0	0	0	0	0		Bacteria;Actinobacteria;Actinobacteria;Streptosporangiales;Thermomonosporaceae;Thermomonosporaceae_unclassified;Thermomonosporaceae_unclassified
HWI-M02808_115_AHB9G_1_2107_24925_7567	202	2	3	0	35	5	0	12	0	0	1	11	8	2	1	0	9	1	3	0	0	0	0	22	0	0	0	2	1	17	51	1	1	1	8	0	0	0		Bacteria;Verrucomicrobia;Verrucomicrobia_Incertae_Sedis;Unknown_Order;Unknown_Family;Candidatus_Methylacidiphilum;uncultured_bacterium
HWI-M02808_115_AHB9G_1_1102_4680_8580	202	23	0	0	2	3	0	1	0	0	0	7	15	0	9	0	0	0	2	0	6	62	0	16	0	0	0	10	13	14	0	0	2	0	0	5	0	0		Bacteria;Actinobacteria;Actinobacteria;Propionibacteriales;Nocardioidaceae;Kribbella;Kribbella_unclassified
HWI-M02808_177_ANHM9_1_2112_6943_25280	202	0	0	0	0	0	0	0	0	0	0	0	0	0	0	0	0	0	0	0	0	0	0	0	0	0	5	0	0	0	0	0	17	88	0	0	0	92		Bacteria;Acidobacteria;Acidobacteria;Subgroup_2;uncultured_forest_soil_bacterium;uncultured_forest_soil_bacterium_unclassified;uncultured_forest_soil_bacterium_unclassified
HWI-M02808_177_ANHM9_1_2109_25550_24430	202	0	0	0	0	0	0	0	0	0	0	0	2	0	0	0	12	0	0	2	0	0	1	3	0	0	5	30	13	24	0	6	39	2	0	0	53	0		Bacteria;Proteobacteria;Alphaproteobacteria;Caulobacterales;Caulobacteraceae;Phenylobacterium;Phenylobacterium_unclassified
HWI-M02808_177_ANHM9_1_1113_4504_10010	202	0	0	0	17	9	13	9	0	17	2	15	0	8	0	0	0	5	0	2	14	63	0	0	2	0	0	0	0	2	1	5	0	1	0	0	0	0		Bacteria;Actinobacteria;Actinobacteria;Frankiales;Frankiaceae;Jatrophihabitans;Jatrophihabitans_unclassified
HWI-M02808_177_ANHM9_1_1107_6152_5285	202	0	0	0	0	1	0	9	0	0	0	0	0	0	4	65	0	0	47	0	0	0	0	12	0	0	0	14	11	0	30	0	0	3	0	0	0	0		Bacteria;Fibrobacteres;Fibrobacteria;Fibrobacterales;Fibrobacteraceae;possible_genus_04;uncultured_bacterium
HWI-M02808_177_ANHM9_1_2106_12100_14957	202	0	0	3	106	0	0	9	0	0	0	0	0	1	1	2	2	3	0	0	0	0	0	1	0	3	0	10	10	9	7	14	4	5	0	0	0	0		Bacteria;Verrucomicrobia;OPB35_soil_group;OPB35_soil_group_unclassified;OPB35_soil_group_unclassified;OPB35_soil_group_unclassified;OPB35_soil_group_unclassified
HWI-M02808_115_AHB9G_1_1103_13931_20066	202	11	2	0	6	7	0	20	0	0	0	13	3	0	2	0	1	1	1	0	0	0	0	0	0	18	5	7	5	0	3	13	7	11	0	34	0	11		Bacteria;Actinobacteria;Thermoleophilia;Gaiellales;Gaiellales_uncultured;bacterium_Ellin6504;bacterium_Ellin6504_unclassified
HWI-M02808_177_ANHM9_1_2110_20814_2988	202	0	24	0	9	55	9	3	4	5	7	9	2	0	0	9	0	4	1	1	0	0	0	0	24	0	0	0	0	0	0	0	0	0	7	0	0	1		Bacteria;Actinobacteria;Thermoleophilia;Solirubrobacterales;Solirubrobacterales_unclassified;Solirubrobacterales_unclassified;Solirubrobacterales_unclassified
HWI-M02808_115_AHB9G_1_2108_21150_7953	201	0	0	9	8	5	28	9	0	29	16	11	0	3	0	16	0	2	0	3	0	0	0	6	4	3	0	0	0	0	5	0	0	0	15	0	0	0		Bacteria;Proteobacteria;Deltaproteobacteria;Myxococcales;Polyangiaceae;Sorangium;uncultured_bacterium
HWI-M02808_115_AHB9G_1_1105_4989_12425	201	10	0	9	0	0	0	17	0	0	0	7	15	0	6	12	16	1	37	0	0	13	0	24	0	0	0	13	1	0	0	2	0	0	0	12	0	0		Bacteria;Elusimicrobia;Elusimicrobia;Lineage_IIb;uncultured_bacterium;uncultured_bacterium_unclassified;uncultured_bacterium_unclassified
HWI-M02808_115_AHB9G_1_1101_19159_3405	201	101	6	0	0	0	0	28	0	0	0	0	0	0	0	0	0	0	0	0	0	0	0	0	0	17	1	0	0	0	0	0	0	2	0	9	0	3		Bacteria;Proteobacteria;Deltaproteobacteria;Myxococcales;Haliangiaceae;Haliangium;uncultured_Nannocystineae_bacterium
HWI-M02808_115_AHB9G_1_2103_8197_20567	201	2	2	2	34	9	0	13	0	0	4	4	40	5	0	13	16	1	20	0	0	0	1	4	0	0	0	1	9	6	3	0	0	0	0	0	0	0		Bacteria;Armatimonadetes;Armatimonadetes_unclassified;Armatimonadetes_unclassified;Armatimonadetes_unclassified;Armatimonadetes_unclassified;Armatimonadetes_unclassified
HWI-M02808_115_AHB9G_1_1101_21625_7762	201	0	0	0	0	0	0	0	0	0	0	0	0	0	0	0	0	0	0	0	0	0	0	0	0	0	0	0	0	0	0	0	0	0	201	0	0	0	GRFL_Unique	Bacteria;Acidobacteria;Acidobacteria;Acidobacteriales;Acidobacteriaceae_(Subgroup_1);Acidobacteriaceae_(Subgroup_1)_unclassified;Acidobacteriaceae_(Subgroup_1)_unclassified
HWI-M02808_115_AHB9G_1_1101_6197_15668	200	60	0	0	1	2	0	0	0	0	0	5	41	1	4	2	10	2	10	11	0	4	6	18	0	0	0	6	0	6	0	0	0	0	0	0	0	0		Bacteria;Acidobacteria;Acidobacteria;Subgroup_6;uncultured_bacterium_gp6;uncultured_bacterium_gp6_unclassified;uncultured_bacterium_gp6_unclassified
[truncated: 14,904 more rows]
