# Supplementary material for: Canopy soil bacterial communities altered by severing host tree limbs
Source: PubMed Central journal article supplement (PMC5591635; doi:10.7717/peerj.3773), 2017-09-06
Supplement: peerj-05-3773-s001.pdf [file peerj-05-3773-s001.pdf]

## Canopy soil bacterial communities altered by severing host tree limbs

Cody R. Dangerfield, Nalini M. Nadkarni, William J. Brazelton

### Supplementary File S1

**Additional photographs of the study area, experimental treatments, and samples.**

Photo credits: N. Nadkarni

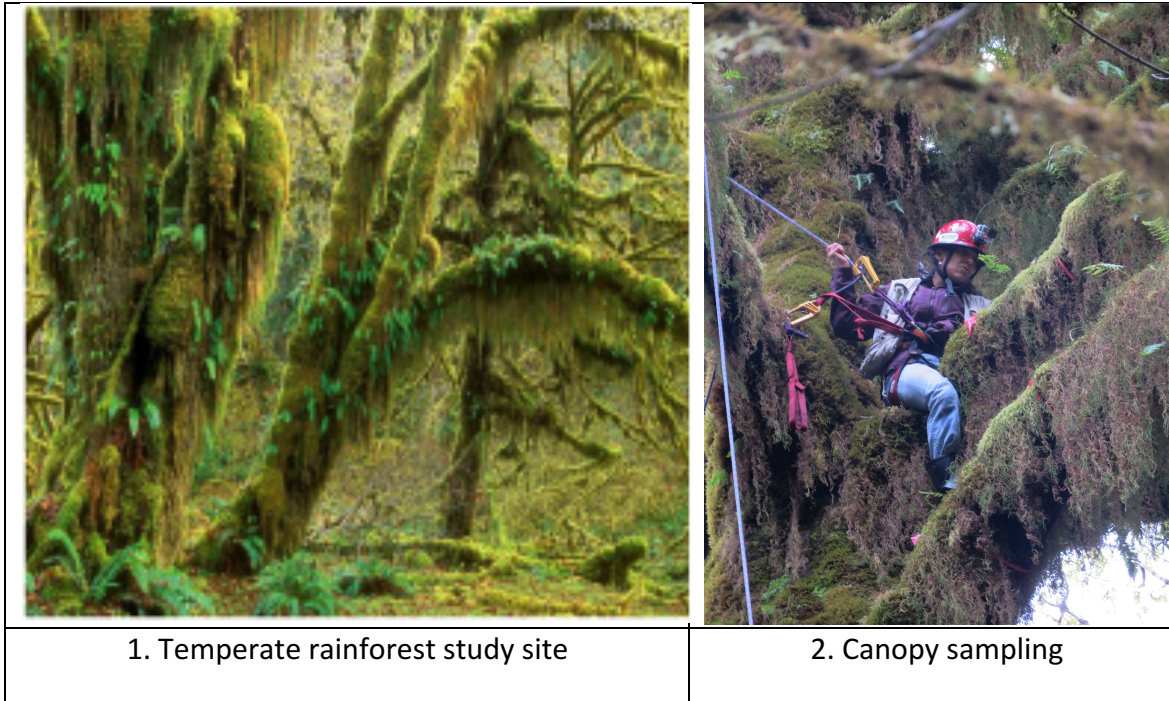

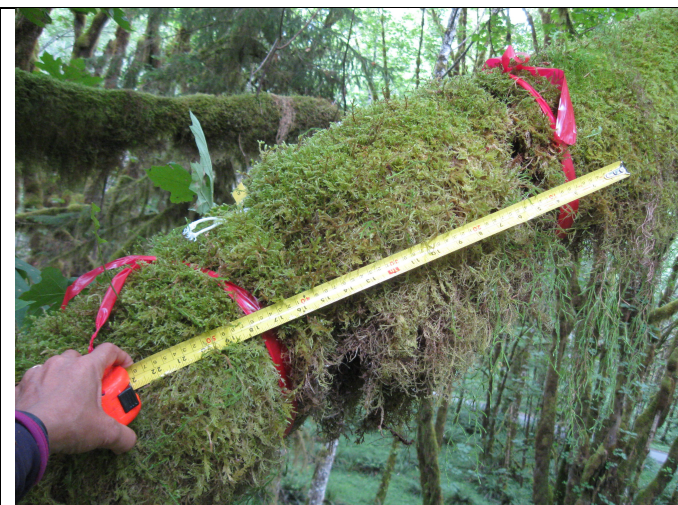

3. Canopy-original

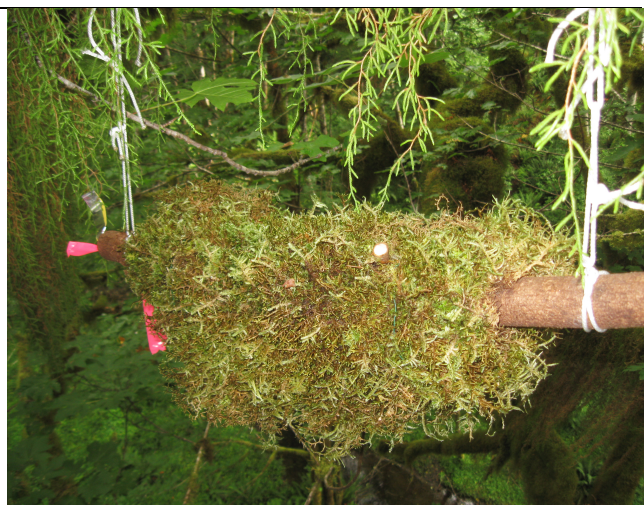

4. Canopy-severed

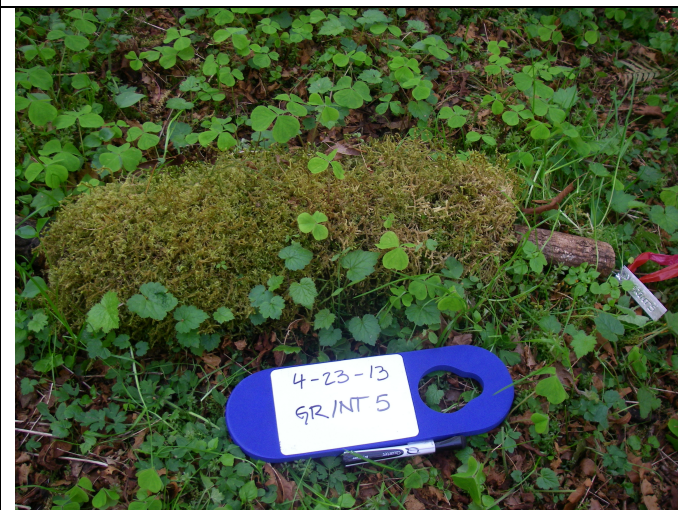

5. Ground-perched

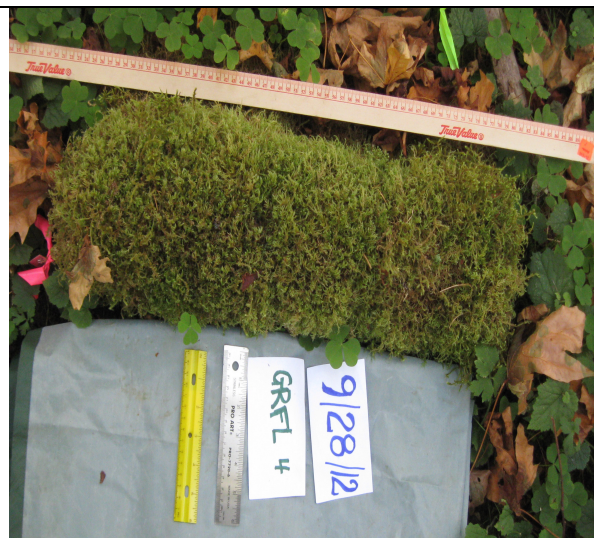

6. Ground-flat

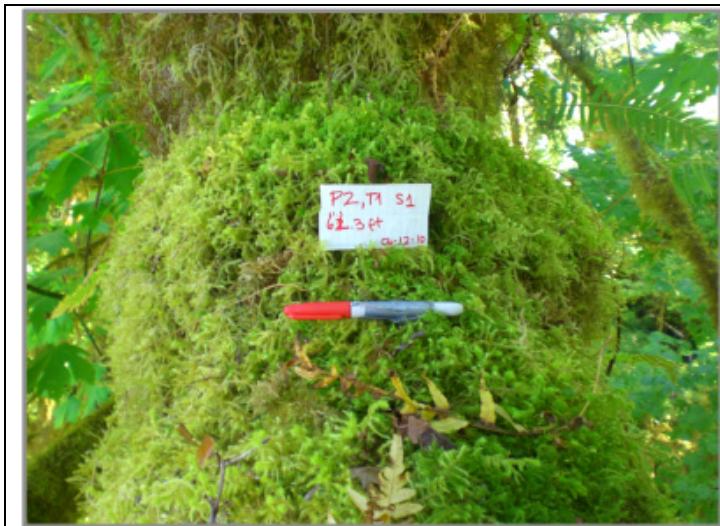

7. Undisturbed epiphytic material

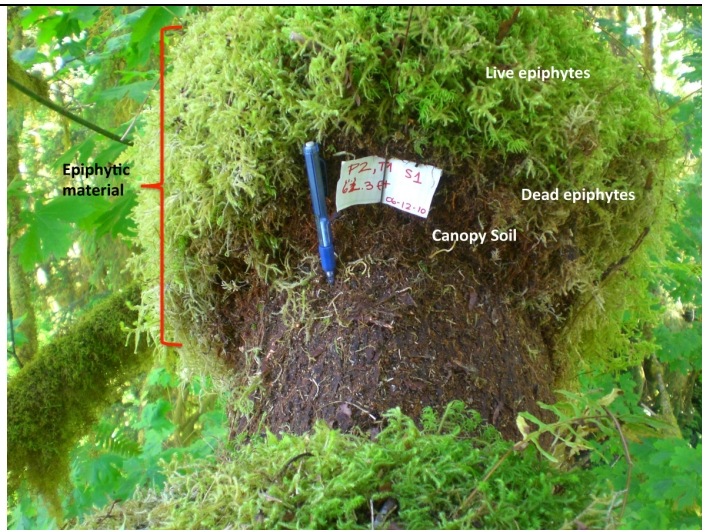

8. Epiphytic material with exposed canopy soil

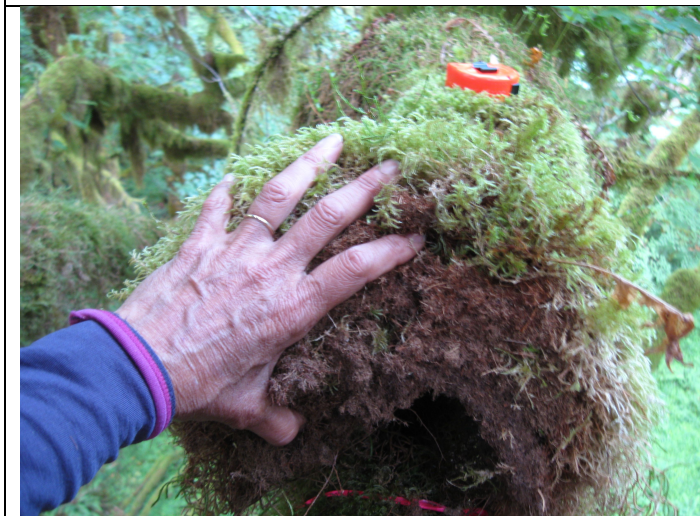

9. Canopy soil profile

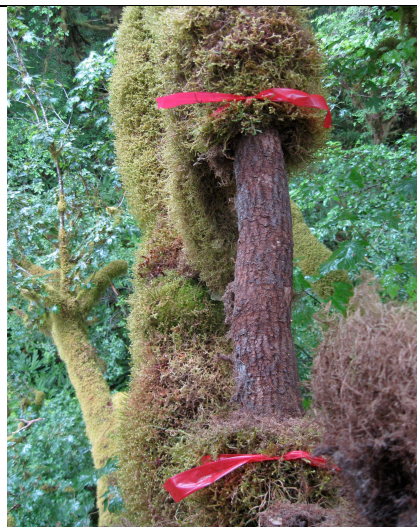

10. Branch with epiphytic material removed
